# Supplementary material for: Flow technology enabled preparation of C3-heterosubstituted 1-azabicyclo[1.1.0]butanes and azetidines: accessing unexplored chemical space in strained heterocyclic chemistry
Source: Royal Society of Chemistry journal article supplement (doi:10.1039/d2cc01641a), 2022-01-01
Supplement: d2cc01641a1.pdf [file d2cc01641a1.pdf]

# Flow Technology Enabled Preparation of C3-Heterosubstituted 1-azabicyclo[1.1.0]butanes and Azetidines: Accessing Unexplored Chemical Space in Strained Heterocyclic Chemistry

Pantaleo Musci,<sup>a</sup> Marco Colella,<sup>a</sup> Michael Andresini,<sup>a</sup> Andrea Aramini,<sup>b</sup> Leonardo Degennaro,<sup>\*c</sup>  
Renzo Luisi<sup>\*a</sup>

<sup>a</sup> FLAME-Lab, Flow Chemistry and Microreactor Technology Laboratory, Department of Pharmacy – Drug Sciences, University of Bari “A. Moro” Via E. Orabona 4 - 70125 Bari, Italy.

<sup>b</sup> Department of Discovery, Dompé Farmaceutici S.p.A., Via Campo di Pile, L’Aquila 67100, Italy.

e-mail: [renzo.luisi@uniba.it](mailto:renzo.luisi@uniba.it)

## Supporting Information

Table of contents:

|                                                                                    |        |
|------------------------------------------------------------------------------------|--------|
| 1. General methods                                                                 | S1     |
| 2. Electrophiles collection                                                        | S2-4   |
| 3. General procedures for the preparation of C3-functionalized ABBs and azetidines | S5-6   |
| 4. Optimization of C3 thiolation                                                   | S7     |
| 5. Characterization of compounds                                                   | S8-26  |
| 6. Copy of NMR spectra                                                             | S27-95 |
| 7. References                                                                      | S96    |

## 1. General methods

Infrared spectra of the compounds were recorded in reciprocal centimeters ( $\text{cm}^{-1}$ ) by using a PerkinElmer 283 spectrometer. Melting points were measured with Büchi melting point B-545.  $^1\text{H}$ ,  $^{13}\text{C}$  and  $^{19}\text{F}$  NMR spectra were recorded with a Varian Mercury 300 spectrometer (300 MHz for  $^1\text{H}$ , 75 MHz for  $^{13}\text{C}$ , 282 MHz for  $^{19}\text{F}$ ) and an Agilent 500 spectrometer (500 MHz for  $^1\text{H}$ , 126 MHz for  $^{13}\text{C}$ , 470 MHz for  $^{19}\text{F}$ ). The center of the (residual) solvent signal was used as an internal standard which was related to TMS with  $\delta$  7.26 ppm ( $^1\text{H}$  in  $\text{CDCl}_3$ ),  $\delta$  77.00 ppm ( $^{13}\text{C}$  in  $\text{CDCl}_3$ ). Spin-spin coupling constants ( $J$ ) are given in Hz. As far as possible, unambiguous assignment of all resonances was performed by combined application of 2D NMR techniques, *i.e.* HSQC and COSY experiments. Data are reported as follows: chemical shift [multiplicity (s = singlet, d = doublet, t = triplet, q = quartet, p = pentet, m = multiplet and bs = broad singlet), coupling constant (in Hz), integration and assignment]. NOESY experiments were performed for structural evaluations of the products. High resolution mass spectrometry (HRMS) spectra were performed on Agilent 6530 accurate mass Q-TOF instrument and Excalibur data system. Diastereomeric ratio was assessed by  $^1\text{H}$  NMR analysis on the reaction crude. Silica (70–230 mesh and 230–400 mesh) was used for flash chromatography on glass columns. TLC was carried out on a 0.25 mm precoated silica gel thick plates (Merck) with a fluorescence indicator F-254; the spots were visualized under UV light ( $\lambda = 254 \text{ nm}$ ) and/or  $\text{KMnO}_4$  (aq.) was used as revealing system.

Chemicals were purchased from Sigma-Aldrich, Fluorochem, TCI Europe and Alfa Aesar unless otherwise specified. THF was distilled prior to use. Organolithium reagents were titrated prior to use (using *N*-benzylbenzamide as titrating agent).<sup>1</sup>

*Flow equipment:* General fluidic connections were achieved using PFA tubing (Bola), with PEEK or PTFE fittings (Idex). Stainless steel microtube reactors (1.0 mm ID, length R1 250 cm and R2 200 cm) and stainless-steel T-connectors (M1 0.5 mm and M2 1.0 mm through hole) were employed. Flow microreactor systems were immersed in a cooling bath (0 °C). Solutions of the reaction components were pumped using syringe pumps Harvard PHD 2000, equipped with gastight syringes purchased from SGE.

## 2. Electrophiles collection

The following compounds are available from Sigma-Aldrich, TCI Europe, Fluorochem and Alfa Aesar except for **12h**, **12i**, **12j**, **12m**, **12n**, **12p**, **12s**, **12t**, **12u** and **16** which have been prepared.

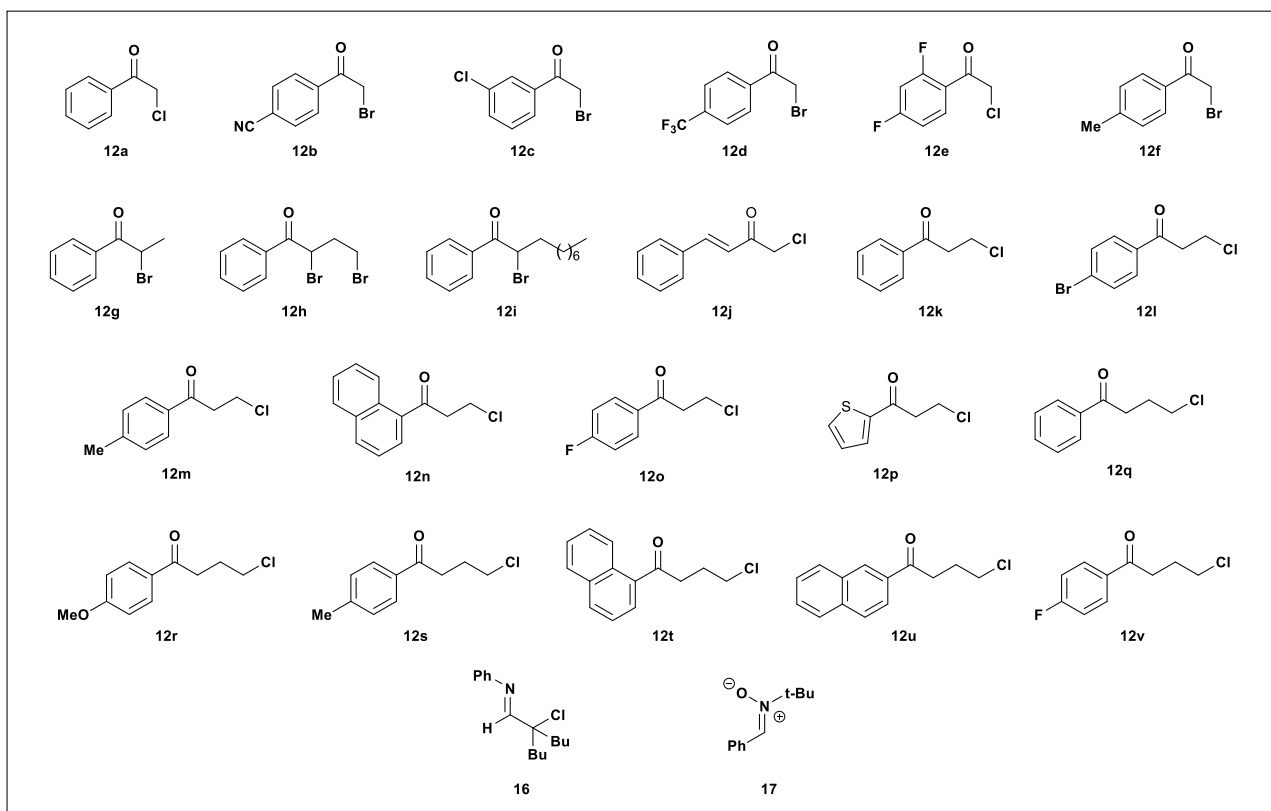

### 2.1 Procedure for the preparation of 2,4-dibromo-1-phenylbutan-1-one **12h**

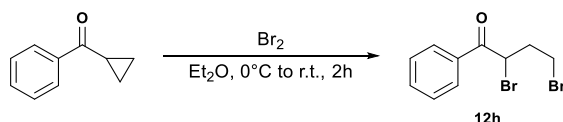

To a solution of cyclopropyl(phenyl)methanone (585 mg, 4 mmol) in diethyl ether (4 mL) at 0°C, Br<sub>2</sub> (230 μL, 4.5 mmol) was added dropwise. The reaction was allowed to warm. After stirring for 2 hours, the crude was poured into a solution of Na<sub>2</sub>S<sub>2</sub>O<sub>5</sub> (1M, 5 mL). The mixture was extracted with Et<sub>2</sub>O (3 x 5 mL) and the combined organic layers were dried over Na<sub>2</sub>SO<sub>4</sub>, filtered and concentrated under reduced pressure. The product was obtained as colourless oil (923 mg, 75%) and used without further purifications. The data are consistent with literature.<sup>2</sup>

### 2.2 Procedure for the preparation of 2-bromo-1-phenyldecan-1-one **12i**

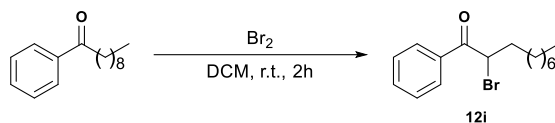

To a solution of 1-phenyldecan-1-one (930 mg, 4 mmol) in DCM (7 mL), Br<sub>2</sub> (205 μL, 4 mmol) was added dropwise. After stirring for 2 hours at room temperature, the crude was poured in a solution of Na<sub>2</sub>S<sub>2</sub>O<sub>5</sub> (1M,

7 mL). The mixture was extracted with DCM (3 x 5 mL) and the combined organic layers were dried over  $\text{Na}_2\text{SO}_4$ , filtered, and concentrated under reduced pressure. Column chromatography on silica gel afforded the desired product (859 mg, 69%) as pale yellow oil.  $R_f = 0.4$  (Hexane/EtOAc 9:1). The data are consistent with literature.<sup>3</sup>

### 2.3 Flow procedure for the preparation of (E)-1-Chloro-4-phenylbut-3-en-2-one **12j**

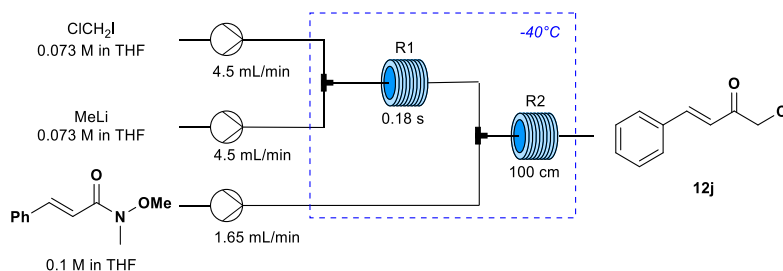

Compound **12j** was synthesized following a reported flow procedure,<sup>4</sup> starting from chloriodomethane, MeLi and *N*-methoxy-*N*-methylcinnamamide. Compound **12j** was obtained as yellow oil (70 %). The data are consistent with literature.<sup>4</sup>

### 2.4 General procedure for the preparation of ketones **12m**, **12n**, **12p**, **12s**, **12t**, **12u** (Friedel-Craft acylation)

To a stirring suspension of  $\text{AlCl}_3$  (6.6 mmol, 1.1 equivalent) in DCM (20 mL), 3-chloropropionyl chloride or 4-chlorobutyryl chloride (6.6 mmol, 1.1 equivalent) was added dropwise at  $0^\circ\text{C}$ . After 10 minutes, a solution of aromatic substrate (6 mmol, 1 equivalent) in DCM (15 mL) was added to the suspension. The crude was warmed at room temperature and stirred for 2-6 hours. The reaction was monitored by TLC. After the completion of the reaction, the crude was diluted with ice cold water (20 mL). The organic phase was washed with HCl 1M (15 mL),  $\text{NaHCO}_3$  sat (15 mL) and brine (15 mL), dried over  $\text{Na}_2\text{SO}_4$ , filtered, and concentrated under reduced pressure. Column chromatography on silica gel afforded the desired product.

#### 3-chloro-1-(*p*-tolyl)propan-1-one **12m**

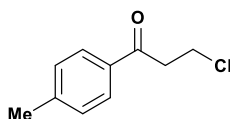

Starting from 3-chloropropionyl chloride and toluene, **12m** was obtained as pale yellow oil (668 mg, 61 %) after column chromatography on silica gel (hexane/EtOAc 9:1,  $R_f$  0.4). The data are consistent with literature.<sup>5</sup>

#### 3-chloro-1-(naphthalen-1-yl)propan-1-one **12n**

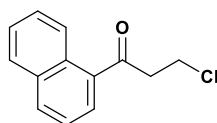

Starting from 3-chloropropionyl chloride and naphthalene, **12n** was obtained as yellow oil (722 mg, 55 %) after column chromatography on silica gel (hexane/EtOAc 8:2,  $R_f$  0.5). The data are consistent with literature.<sup>6</sup>

#### 3-chloro-1-(5-iodothiophen-2-yl)propan-1-one **12p**

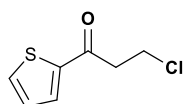

Starting from 3-chloropropionyl chloride and thiophene, **12p** was obtained as waxy yellow solid (1.28 g, 71 %) after column chromatography on silica gel (hexane/EtOAc 8:2,  $R_f$  0.5). The data are consistent with literature.<sup>7</sup>

#### 4-chloro-1-(p-tolyl)butan-1-one **12s**

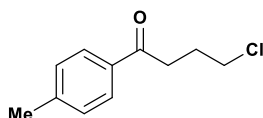

Starting from 4-chlorobutyryl chloride and toluene, **12s** was obtained as white solid (696 mg, 59 %) after column chromatography on silica gel (hexane/EtOAc 9:1,  $R_f$  0.5). The data are consistent with literature.<sup>8</sup>

#### 4-chloro-1-(naphthalen-1-yl)butan-1-one **12t** and 4-chloro-1-(naphthalen-2-yl)butan-1-one **12u**

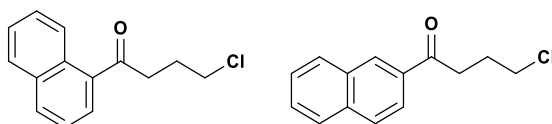

Starting from 4-chlorobutyryl chloride and naphthalene, mixture of **12t** and **12u** was obtained. After column chromatography on silica gel (hexane/EtOAc 9:1) **12t** ( $R_f$  0.55, 810 mg, 58 %) and **12u** ( $R_f$  0.45, 475 mg, 34 %) were obtained as colorless oils. The data are consistent with literature.<sup>9</sup>

### 2.5 Procedure for the preparation of 2-butyl-2-chloro-N-phenylhexan-1-imine **16**

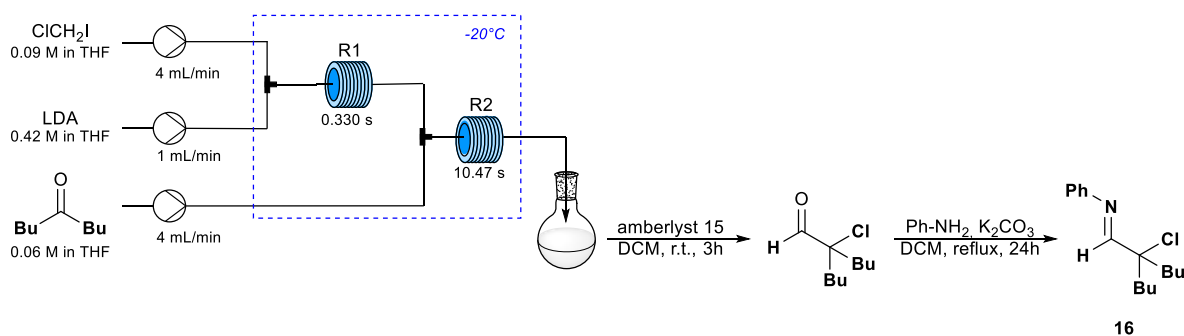

Imine **16** was prepared with a flow-batch approach. 2-Butyl-2-chlorohexanal was prepared following a reported flow procedure,<sup>10</sup> starting from chloriodomethane, LDA and nonan-5-one, and obtained as yellow oil (91 %). The data are consistent with literature.<sup>10</sup> The crude was used without further purification. To a solution of the aldehyde (763 mg, 4 mmol) in DCM (10 mL), aniline (0.364 mL, 4 mmol) and  $K_2CO_3$  (663 mg, 4.8 mmol) were added, and the mixture was refluxed for 24 hours. The crude was diluted with water (10 mL) and extracted with DCM (3 x 10 mL). The combined organic layers were dried over  $Na_2SO_4$ , filtered, and concentrated under reduced pressure. The product was obtained as a colorless oil (776 mg, 73 %) and used without further purification.

### 3. General procedures for the preparation of C3-functionalized ABBs and azetidines

#### 3.1 General procedure 1 (GP1) for the preparation of 3-(oxiran-2-yl)-1-azabicyclo[1.1.0]butanes **5** and 1-(1-azabicyclo[1.1.0]butan-3-yl)-chloroalcohol **13**

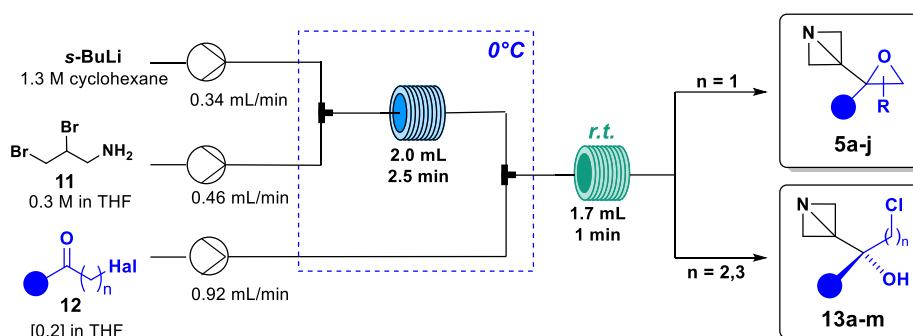

3-(oxiran-2-yl)-1-azabicyclo[1.1.0]butanes **5a-j** and 1-(1-azabicyclo[1.1.0]butan-3-yl)-chloroalcohol **13a-m** were prepared following the reported flow procedure,<sup>11</sup> starting from *sec*-BuLi, 2,3-dibromopropan-1-amine and the corresponding haloketone. After steady state was reached, the crude was collected for 3 minutes while being quenched with water. The desired product was obtained washing the crude with ethyl ether or after column chromatography on silica gel.

#### 3.2 General procedure 2 (GP2) for the preparation of 3-(oxetan-2-yl)-1-azabicyclo[1.1.0]butanes **6** and 3-(tetrahydrofuran-2-yl)-1-azabicyclo[1.1.0]butanes **7**

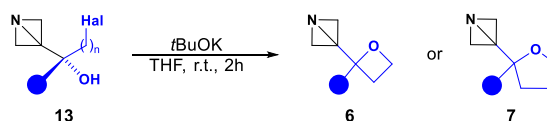

To a solution of alcohol **13** (0.2 mmol) in THF (2 mL), potassium *tert*-butoxide (0.6 mmol, 67 mg) was added. After stirring for 2 hours, the reaction crude was diluted with water (1 mL). The mixture was extracted with EtOAc (3 x 3 mL) and the combined organic layers were dried over Na<sub>2</sub>SO<sub>4</sub>, filtered and concentrated under reduced pressure.

#### 3.3 General procedure 3 (GP3) for the C3 halogenation of ABBs

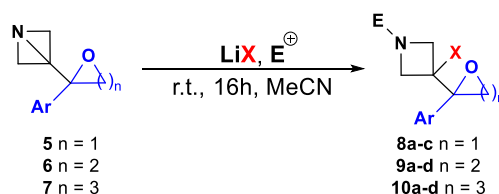

To a solution of ABB **5-7** (0.25 mmol) in acetonitrile (2.5 mL), lithium salt (0.75 mmol, unless otherwise specified) and electrophile (Boc<sub>2</sub>O or tosyl chloride, 0.5 mmol) were added. After stirring for 16 hours, the reaction crude was diluted with water (2 mL). The mixture was extracted with EtOAc (3 x 3 mL) and the combined organic layers were dried over Na<sub>2</sub>SO<sub>4</sub>, filtered and concentrated under reduced pressure. Column chromatography on silica gel afforded the desired product.

### 3.4 General procedure 4 (GP4) for the C3 thiolation of ABBs

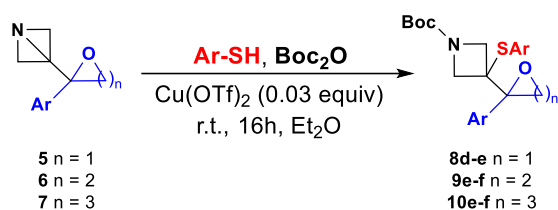

To a solution of ABB **5-7** (0.25 mmol) in ethyl ether (2.5 mL), aromatic thiol (0.75 mmol),  $\text{Boc}_2\text{O}$  (0.5 mmol) and  $\text{Cu}(\text{OTf})_2$  (0.0075 mmol) were added. After stirring for 16 hours, the reaction crude was diluted with water (2 mL). The mixture was extracted with EtOAc (3 x 3 mL) and the combined organic layers were dried over  $\text{Na}_2\text{SO}_4$ , filtered and concentrated under reduced pressure. Column chromatography on silica gel afforded the desired product.

#### 4. Optimization of C3 thiolation

Table S1

Optimization of the C3 thiolation of ABBs involving **6a** and thiophenol.

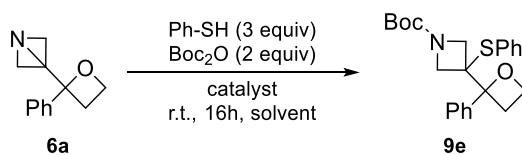

| Entry          | Catalyst                                  | Solvent           | Variation of conditions | <b>9e</b> NMR yield <sup>a</sup> |
|----------------|-------------------------------------------|-------------------|-------------------------|----------------------------------|
| 1              | FeCl <sub>3</sub> (20%)                   | DCM               | Ph-SH (1 equiv), reflux | 0 %                              |
| 2 <sup>b</sup> | FeCl <sub>3</sub> (20%)                   | DCM               | Ph-SH (1 equiv), reflux | 7 %                              |
| 3 <sup>b</sup> | Na <sub>2</sub> CO <sub>3</sub> (1 equiv) | MeCN              | Ph-SH (1 equiv), reflux | S.M.                             |
| 4 <sup>b</sup> | Cs <sub>2</sub> CO <sub>3</sub> (2 equiv) | MeCN              | Ph-SH (1 equiv), reflux | S.M.                             |
| 5 <sup>b</sup> | BF <sub>3</sub> (2 equiv)                 | MeCN              | Ph-SH (1 equiv), reflux | 0 %                              |
| 6 <sup>b</sup> | /                                         | DCM               | Ph-SH (1 equiv), reflux | S.M.                             |
| 7 <sup>b</sup> | Cu(OTf) <sub>2</sub> (0.03 equiv)         | Et <sub>2</sub> O | Ph-SH (1 equiv)         | 32 %                             |
| 8              | Cu(OTf) <sub>2</sub> (0.03 equiv)         | Et <sub>2</sub> O | /                       | 84 %                             |

<sup>a</sup> Dibromomethane was used as internal standard. <sup>b</sup> Two-steps reaction: a solution of **6a**, Ph-SH and catalyst was stirred for 16 h; then Boc<sub>2</sub>O was added, and the solution was stirred for 1h.



## 5. Characterization of compounds

### 3-(2-phenyloxiran-2-yl)-1-azabicyclo[1.1.0]butane **5a**

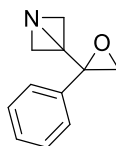

Following the GP1 with **12a** as electrophile, **5a** was obtained as a pale yellow oil (47 mg, 65 %). The data are consistent with literature.<sup>11</sup>

### 4-(2-(1-azabicyclo[1.1.0]butan-3-yl)oxiran-2-yl)benzonitrile **5b**

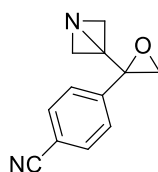

Following the GP1 with **12b** as electrophile, **5b** was obtained as a pale yellow oil (41 mg, 50%) after column chromatography ( $R_f = 0.3$ , hexane/EtOAc 7:3). FT-IR  $\nu_{\max}/\text{cm}^{-1}$  2917, 2849, 2230, 1610, 1505, 1403, 1221, 1122, 1047, 916, 836, 733.  $^1\text{H}$  NMR (500 MHz,  $\text{CDCl}_3$ )  $\delta$  7.69 – 7.62 (m, 4H, Ar-H), 3.19 (d,  $J = 5.7$  Hz, 1H,  $\text{OCH}_2$ ), 2.88 (d,  $J = 5.7$  Hz, 1H,  $\text{OCH}_2$ ), 2.40 (s, 2H,  $\text{NCH}_2$ ), 1.46 (s, 1H,  $\text{NCH}_2$ ), 1.36 (s, 1H,  $\text{NCH}_2$ ).  $^{13}\text{C}$  NMR (126 MHz,  $\text{CDCl}_3$ )  $\delta$  142.8 (Ar- $\text{C}_q$ ), 132.4 (2 x Ar-C), 127.3 (2 x Ar-C), 118.6 (CN), 112.4 (Ar- $\text{C}_q$ ), 57.0 (Oxiranyl- $\text{C}_q$ ), 55.2 ( $\text{OCH}_2$ ), 54.15 ( $\text{NCH}_2$ ), 54.04 ( $\text{NCH}_2$ ), 30.8 ( $\text{NC}_q$ ). HRMS  $m/z$  calculated for  $\text{C}_{12}\text{H}_{10}\text{N}_2\text{NaO}$  [ $\text{M}+\text{Na}$ ] $^+$  221.0691; found 221.0686.

### 3-(2-(3-chlorophenyl)oxiran-2-yl)-1-azabicyclo[1.1.0]butane **5c**

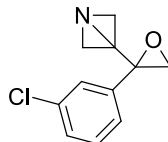

Following the GP1 with **12c** as electrophile, **5c** was obtained as a pale yellow oil (51 mg, 60 %) after column chromatography ( $R_f = 0.4$ , hexane/EtOAc 8:2). FT-IR  $\nu_{\max}/\text{cm}^{-1}$  3061, 2953, 1694, 1599, 1573, 1476, 1428, 1336, 1220, 1079, 929, 882, 787, 691.  $^1\text{H}$  NMR (500 MHz,  $\text{CDCl}_3$ )  $\delta$  7.51 – 7.49 (m, 1H, Ar-H), 7.41 – 7.38 (m, 1H, Ar-H), 7.31 – 7.28 (m, 2H, Ar-H), 3.13 (d,  $J = 5.8$  Hz, 1H,  $\text{OCH}_2$ ), 2.89 (d,  $J = 5.8$  Hz, 1H,  $\text{OCH}_2$ ), 2.43 – 2.35 (m, 2H,  $\text{NCH}_2$ ), 1.44 (d,  $J = 2.2$  Hz, 1H,  $\text{NCH}_2$ ), 1.34 (d,  $J = 2.2$  Hz, 1H,  $\text{NCH}_2$ ).  $^{13}\text{C}$  NMR (126 MHz,  $\text{CDCl}_3$ )  $\delta$  139.6 (Ar- $\text{C}_q$ ), 134.6 (Ar- $\text{C}_q$ ), 129.9 (Ar-C), 128.6 (Ar-C), 126.8 (Ar-C), 124.8 (Ar-C), 56.9 (Oxiranyl- $\text{C}_q$ ), 54.9 ( $\text{OCH}_2$ ), 54.1 ( $\text{NCH}_2$ ), 54.0 ( $\text{NCH}_2$ ), 31.1 ( $\text{NC}_q$ ). HRMS  $m/z$  calculated for  $\text{C}_{11}\text{H}_{10}\text{ClNaO}$  [ $\text{M}+\text{Na}$ ] $^+$  230.0349; found 230.0345.

### 3-(2-(4-(trifluoromethyl)phenyl)oxiran-2-yl)-1-azabicyclo[1.1.0]butane **5d**

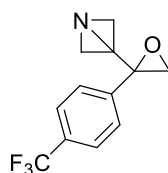

Following the GP1 with **12d** as electrophile, **5d** was obtained as a pale yellow oil (70 mg, 70%) after column chromatography ( $R_f = 0.3$ , hexane/EtOAc 8:2). FT-IR  $\nu_{\max}/\text{cm}^{-1}$  3430, 2917, 1620, 1407, 1325, 1223, 1166, 1122, 1068, 1016, 924, 842, 730.  $^1\text{H}$  NMR (500 MHz,  $\text{CDCl}_3$ )  $\delta$  7.68 – 7.58 (m, 4H, Ar-H), 3.18 (d,  $J = 5.8$  Hz, 1H,  $\text{OCH}_2$ ), 2.89 (d,  $J = 5.8$  Hz, 1H,  $\text{OCH}_2$ ), 2.45 – 2.36 (m, 2H,  $\text{NCH}_2$ ), 1.44 (d,  $J = 1.7$  Hz, 1H,  $\text{NCH}_2$ ), 1.35 (d,  $J = 1.7$

Hz, 1H, NCH<sub>2</sub>). <sup>13</sup>C NMR (126 MHz, CDCl<sub>3</sub>) δ 141.5 (Ar-C<sub>q</sub>), 130.6 (q, <sup>2</sup>J<sub>C-F</sub> = 32.5 Hz, Ar-C<sub>q</sub>), 127.0 (2 x Ar-C), 125.5 (q, <sup>3</sup>J<sub>C-F</sub> = 3.8 Hz, 2 x Ar-C), 124.1 (q, J = 272.1 Hz, CF<sub>3</sub>), 57.1 (Oxiranyl-C<sub>q</sub>), 55.0 (OCH<sub>2</sub>), 54.1 (NCH<sub>2</sub>), 53.9 (NCH<sub>2</sub>), 31.1 (NC<sub>q</sub>). <sup>19</sup>F NMR (282 MHz, CDCl<sub>3</sub>) δ -62.68 (3F). HRMS *m/z* calculated for C<sub>12</sub>H<sub>10</sub>F<sub>3</sub>NNaO [M+Na]<sup>+</sup> 264.0612; found 264.0622.

### 3-(2-(2,4-difluorophenyl)oxiran-2-yl)-1-azabicyclo[1.1.0]butane **5e**

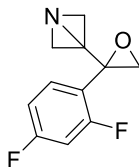

Following the GP1 with **12e** as electrophile, **5e** was obtained as a pale yellow oil (55 mg, 64 %) after column chromatography (*R<sub>f</sub>* = 0.4, hexane/EtOAc 8:2). FT-IR  $\nu_{\max}/\text{cm}^{-1}$  3062, 2924, 1615, 1505, 1427, 1349, 1271, 1141, 1101, 966, 930, 851, 819, 615. <sup>1</sup>H NMR (500 MHz, CDCl<sub>3</sub>) δ 7.43 (td, J = 8.3, 6.5 Hz, 1H, Ar-H), 6.88 (td, J = 8.4, 2.4 Hz, 1H, Ar-H), 6.85 – 6.79 (m, 1H, Ar-H), 3.18 (d, J = 5.6 Hz, 1H, OCH<sub>2</sub>), 2.99 (d, J = 5.6 Hz, 1H, OCH<sub>2</sub>), 2.41 (dd, J = 6.4, 2.6 Hz, 1H, NCH<sub>2</sub>), 2.27 (dd, J = 6.4, 2.5 Hz, 1H, NCH<sub>2</sub>), 1.30 (t, J = 3.1 Hz, 2H, NCH<sub>2</sub>). <sup>13</sup>C NMR (126 MHz, CDCl<sub>3</sub>) δ 163.2 (dd, <sup>1</sup>J<sub>C-F</sub> = 250.1, <sup>3</sup>J<sub>C-F</sub> = 11.6 Hz, Ar-CF), 160.8 (dd, <sup>1</sup>J<sub>C-F</sub> = 250.3, <sup>3</sup>J<sub>C-F</sub> = 12.1 Hz, Ar-CF), 130.4 (dd, <sup>3</sup>J<sub>C-F</sub> = 9.8, 5.4 Hz, Ar-C), 120.4 (dd, <sup>2</sup>J<sub>C-F</sub> = 15.2, <sup>4</sup>J<sub>C-F</sub> = 3.8 Hz, Ar-C<sub>q</sub>), 111.66 (dd, <sup>2</sup>J<sub>C-F</sub> = 21.4, <sup>4</sup>J<sub>C-F</sub> = 3.7 Hz), 104.0 (t, <sup>2</sup>J<sub>C-F</sub> = 25.3 Hz, Ar-C), 54.7 (Oxiranyl-C<sub>q</sub>), 54.0 (NCH<sub>2</sub>), 53.6 (NCH<sub>2</sub>), 53.4 (OCH<sub>2</sub>), 32.1 (NC<sub>q</sub>). <sup>19</sup>F NMR (282 MHz, CDCl<sub>3</sub>) δ -108.96 – -109.23 (m, 1F), -111.51 (q, J = 8.2 Hz, 1F). HRMS *m/z* calculated for C<sub>11</sub>H<sub>9</sub>F<sub>2</sub>NNaO [M+Na]<sup>+</sup> 232.0550; found 232.0545.

### 3-(2-(p-tolyl)oxiran-2-yl)-1-azabicyclo[1.1.0]butane **5f**

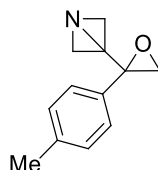

Following the GP1 with **12f** as electrophile, **5f** was obtained as a pale yellow oil (55 mg, 71 %) after column chromatography (*R<sub>f</sub>* = 0.4, hexane/EtOAc 7:3). FT-IR  $\nu_{\max}/\text{cm}^{-1}$  3233, 2920, 1666, 1513, 1417, 1255, 1218, 1182, 1097, 1073, 912, 820, 720. <sup>1</sup>H NMR (500 MHz, CDCl<sub>3</sub>) δ 7.44 – 7.37 (m, 2H, Ar-H), 7.17 (d, J = 7.9 Hz, 2H, Ar-H), 3.12 (d, J = 5.8 Hz, 1H, OCH<sub>2</sub>), 2.92 (d, J = 5.8 Hz, 1H, OCH<sub>2</sub>), 2.40 – 2.37 (m, 2H, NCH<sub>2</sub>), 2.35 (s, 3H, CH<sub>3</sub>), 1.41 – 1.39 (m, 1H, NCH<sub>2</sub>), 1.31 (d, J = 2.5 Hz, 1H, NCH<sub>2</sub>). <sup>13</sup>C NMR (126 MHz, CDCl<sub>3</sub>) δ 138.2 (Ar-C<sub>q</sub>), 134.4 (Ar-C<sub>q</sub>), 129.2 (2 x Ar-C), 126.5 (2 x Ar-C), 57.2 (Oxiranyl-C<sub>q</sub>), 54.7 (OCH<sub>2</sub>), 53.94 (NCH<sub>2</sub>), 53.93 (NCH<sub>2</sub>), 31.6 (NC<sub>q</sub>), 21.3 (CH<sub>3</sub>). HRMS *m/z* calculated for C<sub>12</sub>H<sub>13</sub>NNaO [M+Na]<sup>+</sup> 210.0895; found 210.0892.

### 3-((2S\*,3S\*)-3-methyl-2-phenyloxiran-2-yl)-1-azabicyclo[1.1.0]butane **5g**

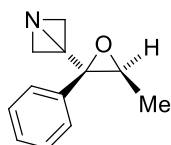

Following the GP1 with **12g** as electrophile, **5g** was obtained as a pale yellow oil (dr > 95:5, 50 mg, 64 %) after column chromatography (*R<sub>f</sub>* = 0.4, hexane/EtOAc 7:3). FT-IR  $\nu_{\max}/\text{cm}^{-1}$  3433, 1638, 1447, 1275, 1261, 1044, 934, 815, 764, 750, 700. <sup>1</sup>H NMR (500 MHz, CDCl<sub>3</sub>) δ 7.40 (d, J = 7.2 Hz, 2H), 7.35 (t, J = 7.3 Hz, 2H), 7.32 – 7.28 (m, 1H), 3.37 (q, J = 5.4 Hz, 1H, OCH), 2.31 (s, 2H, NCH<sub>2</sub>), 1.27 (s, 1H, NCH<sub>2</sub>), 1.23 (s, 1H, NCH<sub>2</sub>), 1.04 (d, J = 5.4 Hz, 3H). <sup>13</sup>C NMR (126 MHz, CDCl<sub>3</sub>) δ 135.1 (Ar-C<sub>q</sub>), 128.3 (2 x Ar-C), 128.1 (Ar-C), 127.6 (2 x Ar-C), 62.4

(Oxiranyl-C<sub>q</sub>), 59.5 (OCHCH<sub>3</sub>), 53.7 (NCH<sub>2</sub>), 53.1 (NCH<sub>2</sub>), 32.9 (NC<sub>q</sub>), 14.3 (OCHCH<sub>3</sub>). HRMS *m/z* calculated for C<sub>12</sub>H<sub>13</sub>NNaO [M+Na]<sup>+</sup> 210.0895; found 210.0906.

### 3-((2S\*,3S\*)-3-(2-bromoethyl)-2-phenyloxiran-2-yl)-1-azabicyclo[1.1.0]butane **5h**

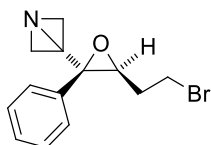

Following the GP1 with **12h** as electrophile, **5h** was obtained as a pale yellow oil (dr > 95:5, 53 mg, 46 %) after column chromatography (R<sub>f</sub> = 0.3, hexane/EtOAc 8:2). FT-IR ν<sub>max</sub>/cm<sup>-1</sup> 3056, 2918, 2849, 1494, 1448, 1266, 1219, 1127, 1076, 1046, 939, 909, 735, 701. <sup>1</sup>H NMR (500 MHz, CDCl<sub>3</sub>) δ 7.41 (d, *J* = 7.2 Hz, 2H, Ar-H), 7.39 – 7.30 (m, 3H, Ar-H), 3.47 – 3.43 (m, 1H, OCH), 3.42 – 3.33 (m, 2H, CH<sub>2</sub>Br), 2.40 – 2.32 (m, 2H, NCH<sub>2</sub>), 1.91 – 1.83 (m, 1H, CH<sub>2</sub>CH<sub>2</sub>Br), 1.76 – 1.68 (m, 1H, CH<sub>2</sub>CH<sub>2</sub>Br), 1.33 (d, *J* = 1.5 Hz, 1H, NCH<sub>2</sub>), 1.27 (d, *J* = 1.5 Hz, 1H, NCH<sub>2</sub>). <sup>13</sup>C NMR (126 MHz, CDCl<sub>3</sub>) δ 134.7 (Ar-C<sub>q</sub>), 128.44 (2 x Ar-C), 128.37 (Ar-C), 127.4 (2 x Ar-C), 62.5 (Oxiranyl-C<sub>q</sub>), 62.1 (OCH), 53.9 (NCH<sub>2</sub>), 53.4 (NCH<sub>2</sub>), 32.7 (NC<sub>q</sub>), 31.6 (CH<sub>2</sub>CH<sub>2</sub>Br), 29.2 (CH<sub>2</sub>Br). HRMS *m/z* calculated for C<sub>26</sub>H<sub>26</sub>Br<sub>2</sub>N<sub>2</sub>NaO<sub>2</sub> [2M+Na]<sup>+</sup> 583.0415 ; found 583.0407.

### 3-((2S\*,3S\*)-3-octyl-2-phenyloxiran-2-yl)-1-azabicyclo[1.1.0]butane **5i**

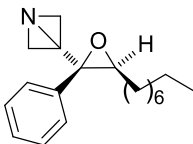

Following the GP1 with **12i** as electrophile, **5i** was obtained as a pale yellow oil (dr > 95:5, 78 mg, 66 %) after column chromatography (R<sub>f</sub> = 0.3, hexane/EtOAc 8:2). FT-IR ν<sub>max</sub>/cm<sup>-1</sup> 2925, 2855, 1604, 1495, 1449, 1400, 1217, 1126, 1075, 929, 907, 767, 734, 700. <sup>1</sup>H NMR (300 MHz, CDCl<sub>3</sub>) δ 7.44 – 7.27 (m, 5H, Ar-H), 3.23 (t, *J* = 6.0 Hz, 1H, OCH), 2.34 – 2.31 (m, 2H, NCH<sub>2</sub>), 1.45 – 1.15 (m, 16H, 14 x (CH<sub>2</sub>)<sub>7</sub> and 2 x NCH<sub>2</sub>), 0.85 (t, *J* = 6.8 Hz, 3H, CH<sub>3</sub>). <sup>13</sup>C NMR (126 MHz, CDCl<sub>3</sub>) δ 135.4 (Ar-C<sub>q</sub>), 128.2 (2 x Ar-C), 128.0 (Ar-C), 127.4 (2 x Ar-C), 63.9 (OCH), 62.2 (Oxiranyl-C<sub>q</sub>), 53.7 (NCH<sub>2</sub>), 53.3 (NCH<sub>2</sub>), 32.9 (NC<sub>q</sub>), 31.9 (CH<sub>2</sub>), 29.4 (CH<sub>2</sub>), 29.3 (CH<sub>2</sub>), 29.2 (CH<sub>2</sub>), 28.3 (CH<sub>2</sub>), 26.1 (CH<sub>2</sub>), 22.7 (CH<sub>2</sub>), 14.2 (CH<sub>3</sub>). HRMS *m/z* calculated for C<sub>19</sub>H<sub>28</sub>NO [M+H]<sup>+</sup> 286.2171; found 286.2177.

### (E)-3-(2-styryloxiran-2-yl)-1-azabicyclo[1.1.0]butane **5j**

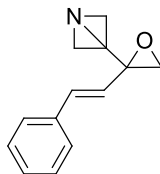

Following the GP1 with **12j** as electrophile, **5j** was obtained as a pale yellow oil (41 mg, 50 %) after column chromatography (R<sub>f</sub> = 0.2, hexane/EtOAc 7:3). FT-IR ν<sub>max</sub>/cm<sup>-1</sup> 2919, 2111, 1645, 1494, 1449, 1261, 1157, 1074, 968, 749, 695. <sup>1</sup>H NMR (500 MHz, CDCl<sub>3</sub>) δ 7.41 – 7.38 (m, 2H, Ar-H), 7.35 – 7.30 (m, 2H, Ar-H), 7.29 – 7.25 (m, 1H, Ar-H), 6.94 (d, *J* = 16.1 Hz, 1H, CH=CH), 6.24 (d, *J* = 16.1 Hz, 1H, CH=CH), 3.07 (d, *J* = 5.8 Hz, 1H, OCH<sub>2</sub>), 2.91 (d, *J* = 5.8 Hz, 1H, OCH<sub>2</sub>), 2.48 (dd, *J* = 6.4, 2.7 Hz, 1H, NCH<sub>2</sub>), 2.42 (dd, *J* = 6.4, 2.6 Hz, 1H, NCH<sub>2</sub>), 1.42 (dd, *J* = 2.6, 0.6 Hz, 1H, NCH<sub>2</sub>), 1.37 (d, *J* = 2.7 Hz, 1H, NCH<sub>2</sub>). <sup>13</sup>C NMR (126 MHz, CDCl<sub>3</sub>) δ 136.1 (Ar-C<sub>q</sub>), 133.7 (CH=CH), 128.8 (2 x Ar-C), 128.4 (Ar-C), 126.7 (2 x Ar-C), 125.8 (CH=CH), 56.4 (Oxiranyl-C<sub>q</sub>), 54.8 (OCH<sub>2</sub>), 54.2 (NCH<sub>2</sub>), 54.0 (NCH<sub>2</sub>), 34.0 (NC<sub>q</sub>). HRMS *m/z* calculated for C<sub>13</sub>H<sub>13</sub>NNaO [M+Na]<sup>+</sup> 222.0895; found 222.0894.

### 1-(1-azabicyclo[1.1.0]butan-3-yl)-3-chloro-1-phenylpropan-1-ol **13a**

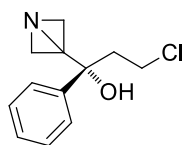

Following the GP1 with **12k** as electrophile, **13a** was obtained as a waxy yellow solid (74 mg, 80%) after washing the crude with ethyl ether (4 mL). FT-IR  $\nu_{\max}/\text{cm}^{-1}$  3177, 2930, 1634, 1446, 1255, 1446, 1255, 1213, 1066, 912, 829, 747, 703, 670.  $^1\text{H}$  NMR (500 MHz,  $\text{CDCl}_3$ )  $\delta$  7.48 – 7.46 (m, 2H, Ar-H), 7.38 (t,  $J = 7.6$  Hz, 2H, Ar-H), 7.31 – 7.28 (m, 1H, Ar-H), 3.63 (td,  $J = 11.0, 5.2$  Hz, 1H,  $\text{CH}_2\text{CH}_2\text{Cl}$ ), 3.23 (td,  $J = 11.0, 5.0$  Hz, 1H,  $\text{CH}_2\text{CH}_2\text{Cl}$ ), 2.61 (dd,  $J = 6.6, 2.5$  Hz, 1H,  $\text{NCH}_2$ ), 2.49 (ddd,  $J = 13.6, 11.3, 5.0$  Hz, 1H,  $\text{CH}_2\text{CH}_2\text{Cl}$ ), 2.33 (ddd,  $J = 13.6, 11.3, 5.2$  Hz, 1H,  $\text{CH}_2\text{CH}_2\text{Cl}$ ), 2.28 (dd,  $J = 6.6, 2.6$  Hz, 1H,  $\text{NCH}_2$ ), 1.42 (d,  $J = 2.3$  Hz, 1H,  $\text{NCH}_2$ ), 1.27 (d,  $J = 2.5$  Hz, 1H,  $\text{NCH}_2$ ).  $^{13}\text{C}$  NMR (126 MHz,  $\text{CDCl}_3$ )  $\delta$  141.8 (Ar- $\text{C}_q$ ), 128.6 (2 x Ar-C), 127.7 (Ar- $\text{C}_q$ ), 125.6 (2 x Ar-C), 72.8 (COH), 54.4 ( $\text{NCH}_2$ ), 53.9 ( $\text{NCH}_2$ ), 44.0 ( $\text{CH}_2\text{CH}_2\text{Cl}$ ), 39.7 ( $\text{CH}_2\text{CH}_2\text{Cl}$ ), 37.9 ( $\text{NC}_q$ ). HRMS  $m/z$  calculated for  $\text{C}_{12}\text{H}_{15}\text{ClNO}$   $[\text{M}+\text{H}]^+$  224.0842; found 224.1436.

### 3-(2-phenyloxetan-2-yl)-1-azabicyclo[1.1.0]butane 6a

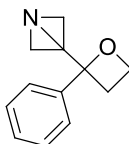

Following the GP2 with **13a**, **6a** was obtained as a pale yellow oil (29 mg, 78 %) without further purification. FT-IR  $\nu_{\max}/\text{cm}^{-1}$  3058, 2948, 2888, 1492, 1448, 1259, 1134, 1075, 1000, 967, 880, 816, 765, 699.  $^1\text{H}$  NMR (500 MHz,  $\text{CDCl}_3$ )  $\delta$  7.46 – 7.41 (m, 2H, Ar-H), 7.40 – 7.35 (m, 2H, Ar-H), 7.30 – 7.26 (m, 1H, Ar-H), 4.63 – 4.57 (m, 1H,  $\text{OCH}_2$ ), 4.56 – 4.50 (m, 1H,  $\text{OCH}_2$ ), 2.93 – 2.85 (m, 1H,  $\text{OCH}_2\text{CH}_2$ ), 2.80 – 2.72 (m, 1H,  $\text{OCH}_2\text{CH}_2$ ), 2.54 - 2.50 (m, 1H,  $\text{NCH}_2$ ), 2.42 – 2.38 (m, 1H,  $\text{NCH}_2$ ), 1.31 (d,  $J = 1.7$  Hz, 1H,  $\text{NCH}_2$ ), 1.25 (t,  $J = 2.3$  Hz, 1H,  $\text{NCH}_2$ ).  $^{13}\text{C}$  NMR (126 MHz,  $\text{CDCl}_3$ )  $\delta$  144.1 (Ar- $\text{C}_q$ ), 128.3 (2 x Ar-C), 127.5 (Ar-C), 124.6 (2 x Ar-C), 84.5 ( $\text{OC}_q$ ), 65.9 ( $\text{OCH}_2\text{CH}_2$ ), 53.1 ( $\text{NCH}_2$ ), 52.2 ( $\text{NCH}_2$ ), 35.3 ( $\text{NC}_q$ ), 31.6 ( $\text{OCH}_2\text{CH}_2$ ). HRMS  $m/z$  calculated for  $\text{C}_{12}\text{H}_{14}\text{NO}$   $[\text{M}+\text{H}]^+$  188.1075; found 188.1067.

### 1-(1-azabicyclo[1.1.0]butan-3-yl)-1-(4-bromophenyl)-3-chloropropan-1-ol 13b

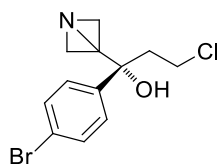

Following the GP1 with **12l** as electrophile, **13b** was obtained as a waxy yellow solid (87 mg, 70 %) after washing the crude with ethyl ether (4 mL). FT-IR  $\nu_{\max}/\text{cm}^{-1}$  3400, 1642, 1487, 1448, 1397, 1255, 1132, 1073, 826, 702, 684.  $^1\text{H}$  NMR (500 MHz,  $\text{CDCl}_3$ )  $\delta$  7.52 – 7.48 (m, 2H, Ar-H), 7.38 – 7.34 (m, 2H, Ar-H), 3.62 (td,  $J = 11.0, 5.2$  Hz, 1H,  $\text{CH}_2\text{CH}_2\text{Cl}$ ), 3.24 (s, OH), 3.20 (td,  $J = 10.9, 5.0$  Hz, 1H,  $\text{CH}_2\text{CH}_2\text{Cl}$ ), 2.61 (dd,  $J = 6.7, 2.3$  Hz, 1H,  $\text{NCH}_2$ ), 2.47 – 2.39 (m, 1H,  $\text{CH}_2\text{CH}_2\text{Cl}$ ), 2.33 - 2.28 (m, 2H, 1H  $\text{CH}_2\text{CH}_2\text{Cl}$  and 1H  $\text{NCH}_2$ ), 1.43 (d,  $J = 2.4$  Hz, 1H,  $\text{NCH}_2$ ), 1.26 (d,  $J = 2.5$  Hz, 1H,  $\text{NCH}_2$ ).  $^{13}\text{C}$  NMR (126 MHz,  $\text{CDCl}_3$ )  $\delta$  141.1 (Ar- $\text{C}_q$ ), 131.7 (2 x Ar-C), 127.5 (2 x Ar-C), 121.8 (Ar- $\text{C}_q$ ), 72.6 (COH), 54.02 ( $\text{NCH}_2$ ), 53.91 ( $\text{NCH}_2$ ), 43.8 ( $\text{CH}_2\text{CH}_2\text{Cl}$ ), 39.4 ( $\text{CH}_2\text{CH}_2\text{Cl}$ ), 37.8 ( $\text{NC}_q$ ). HRMS  $m/z$  calculated for  $\text{C}_{12}\text{H}_{13}\text{BrCl}_2\text{NO}$   $[\text{M}+\text{Cl}]^-$  337.9543; found 337.9533.

### 3-(2-(4-bromophenyl)oxetan-2-yl)-1-azabicyclo[1.1.0]butane 6b

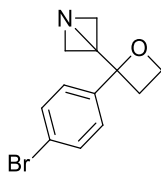

Following the GP2 with **13b**, **6b** was obtained as a pale yellow oil (34 mg, 65 %) without further purification. FT-IR  $\nu_{\max}/\text{cm}^{-1}$  2950, 2888, 1486, 1448, 1395, 1134, 1072, 1009, 967, 881, 820, 700.  $^1\text{H}$  NMR (500 MHz,  $\text{CDCl}_3$ )  $\delta$  7.55 – 7.49 (m, 2H, Ar-H), 7.35 – 7.29 (m, 2H, Ar-H), 4.67 – 4.49 (m, 2H,  $\text{OCH}_2\text{CH}_2$ ), 2.91 (ddd,  $J = 10.9, 8.7, 6.6$  Hz, 1H,  $\text{OCH}_2\text{CH}_2$ ), 2.73 (ddd,  $J = 10.9, 8.8, 6.8$  Hz, 1H,  $\text{OCH}_2\text{CH}_2$ ), 2.52 (dd,  $J = 6.6, 2.9$  Hz, 1H,  $\text{NCH}_2$ ), 2.39 (dd,  $J = 6.6, 2.6$  Hz, 1H,  $\text{NCH}_2$ ), 1.34 (d,  $J = 2.1$  Hz, 1H,  $\text{NCH}_2$ ), 1.28 (d,  $J = 2.7$  Hz, 1H,  $\text{NCH}_2$ ).  $^{13}\text{C}$  NMR (126 MHz,  $\text{CDCl}_3$ )  $\delta$  143.2 (Ar- $\text{C}_q$ ), 131.6 (2 x Ar-C), 126.6 (2 x Ar-C), 121.7 (Ar- $\text{C}_q$ ), 84.4 ( $\text{OC}_q$ ), 66.0 ( $\text{OCH}_2\text{CH}_2$ ), 53.2 ( $\text{NCH}_2$ ), 52.4 ( $\text{NCH}_2$ ), 35.1 ( $\text{NC}_q$ ), 31.7 ( $\text{OCH}_2\text{CH}_2$ ). HRMS  $m/z$  calculated for  $\text{C}_{12}\text{H}_{12}\text{BrNNaO}$   $[\text{M}+\text{Na}]^+$  288.0000; found 287.9994.

### 1-(1-azabicyclo[1.1.0]butan-3-yl)-3-chloro-1-(p-tolyl)propan-1-ol **13c**

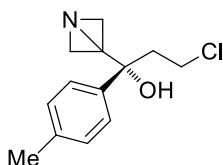

Following the GP1 with **12m** as electrophile, **13c** was obtained as a waxy yellow solid (79 mg, 80 %) after washing the crude with ethyl ether (4 mL). FT-IR  $\nu_{\max}/\text{cm}^{-1}$  3270, 2951, 2920, 1674, 1606, 1513, 1450, 1208, 1182, 1098, 914, 821, 721.  $^1\text{H}$  NMR (500 MHz,  $\text{CDCl}_3$ )  $\delta$  7.36 (d,  $J = 8.2$  Hz, 2H, Ar-H), 7.18 (d,  $J = 8.2$  Hz, 2H, Ar-H), 3.64 (td,  $J = 11.1, 5.1$  Hz, 1H,  $\text{CH}_2\text{CH}_2\text{Cl}$ ), 3.23 (td,  $J = 11.1, 4.9$  Hz, 1H,  $\text{CH}_2\text{CH}_2\text{Cl}$ ), 2.62 (dd,  $J = 6.6, 2.4$  Hz, 1H,  $\text{NCH}_2$ ), 2.49 – 2.41 (m, 1H,  $\text{CH}_2\text{CH}_2\text{Cl}$ ), 2.37 – 2.26 (m, 1H  $\text{NCH}_2$  and 1H  $\text{CH}_2\text{CH}_2\text{Cl}$ ), 2.35 (s, 3H,  $\text{CH}_3$ ), 1.41 (d,  $J = 2.5$  Hz, 1H,  $\text{NCH}_2$ ), 1.24 (d,  $J = 2.6$  Hz, 1H,  $\text{NCH}_2$ ).  $^{13}\text{C}$  NMR (126 MHz,  $\text{CDCl}_3$ )  $\delta$  138.9 (Ar- $\text{C}_q$ ), 137.3 (Ar- $\text{C}_q$ ), 129.2 (2 x Ar-C), 125.5 (2 x Ar-C), 72.6 (COH), 53.8 ( $\text{NCH}_2$ ), 53.6 ( $\text{NCH}_2$ ), 43.8 ( $\text{CH}_2\text{CH}_2\text{Cl}$ ), 39.8 ( $\text{CH}_2\text{CH}_2\text{Cl}$ ), 38.2 ( $\text{NC}_q$ ), 21.1 ( $\text{CH}_3$ ). HRMS  $m/z$  calculated for  $\text{C}_{13}\text{H}_{16}\text{ClNNaO}$   $[\text{M}+\text{Na}]^+$  260.0818; found 260.0818.

### 3-(2-(p-tolyl)oxetan-2-yl)-1-azabicyclo[1.1.0]butane **6c**

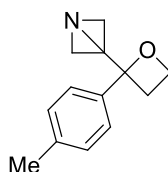

Following the GP2 with **13c**, **6c** was obtained as a pale yellow oil (23 mg, 56 %) without further purification. FT-IR  $\nu_{\max}/\text{cm}^{-1}$  3432, 2949, 2919, 1673, 1513, 1448, 1225, 1181, 1134, 1019, 968, 817, 726.  $^1\text{H}$  NMR (500 MHz,  $\text{CDCl}_3$ )  $\delta$  7.37 – 7.32 (m, 2H, Ar-H), 7.21 (d,  $J = 7.9$  Hz, 2H, Ar-H), 4.61 (ddd,  $J = 8.7, 6.8, 5.7$  Hz, 1H,  $\text{OCH}_2\text{CH}_2$ ), 4.57 – 4.52 (m, 1H,  $\text{OCH}_2\text{CH}_2$ ), 2.88 (ddd,  $J = 10.8, 8.7, 6.5$  Hz, 1H,  $\text{OCH}_2\text{CH}_2$ ), 2.76 (ddd,  $J = 10.8, 8.8, 6.8$  Hz, 1H,  $\text{OCH}_2\text{CH}_2$ ), 2.54 (dd,  $J = 6.6, 3.0$  Hz, 1H,  $\text{NCH}_2$ ), 2.41 (dd,  $J = 6.6, 2.6$  Hz, 1H,  $\text{NCH}_2$ ), 2.36 (s, 3H,  $\text{CH}_3$ ), 1.33 (d,  $J = 2.6$  Hz, 1H,  $\text{NCH}_2$ ), 1.26 (d,  $J = 3.0$  Hz, 1H,  $\text{NCH}_2$ ).  $^{13}\text{C}$  NMR (126 MHz,  $\text{CDCl}_3$ )  $\delta$  141.3 (Ar- $\text{C}_q$ ), 137.3 (Ar- $\text{C}_q$ ), 129.1 (2 x Ar-C), 124.6 (2 x Ar-C), 84.6 ( $\text{OC}_q$ ), 66.0 ( $\text{OCH}_2$ ), 53.2 ( $\text{NCH}_2$ ), 52.3 ( $\text{NCH}_2$ ), 35.5 ( $\text{NC}_q$ ), 31.7 ( $\text{OCH}_2\text{CH}_2$ ), 21.3 ( $\text{CH}_3$ ). HRMS  $m/z$  calculated for  $\text{C}_{13}\text{H}_{15}\text{NNaO}$   $[\text{M}+\text{Na}]^+$  224.1051; found 224.1049.

### 1-(1-azabicyclo[1.1.0]butan-3-yl)-3-chloro-1-(naphthalen-1-yl)propan-1-ol **13d**

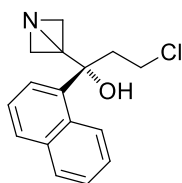

Following the GP1 with **12n** as electrophile, **13d** was obtained as a waxy yellow solid (96 mg, 85 %) after washing the crude with ethyl ether (4 mL). FT-IR  $\nu_{\max}/\text{cm}^{-1}$  3400, 2918, 1723, 1674, 1509, 1325, 1278, 1133, 909, 803, 779, 733.  $^1\text{H}$  NMR (500 MHz,  $\text{CDCl}_3$ )  $\delta$  8.41 (d,  $J = 8.1$  Hz, 1H, Ar-H), 7.92 – 7.87 (m, 2H, Ar-H), 7.82 (d,  $J = 8.2$  Hz, 1H, Ar-H), 7.54 – 7.44 (m, 3H, Ar-H), 3.61 (ddd,  $J = 11.2, 10.4, 5.0$  Hz, 1H,  $\text{CH}_2\text{CH}_2\text{Cl}$ ), 3.06 – 2.94 (m, 1H  $\text{CH}_2\text{CH}_2\text{Cl}$  and 1H  $\text{CH}_2\text{CH}_2\text{Cl}$ ), 2.92 (dd,  $J = 6.5, 2.4$  Hz, 1H,  $\text{NCH}_2$ ), 2.74 (bs, 1H, OH), 2.50 (ddd,  $J = 12.6, 11.0, 5.0$  Hz, 1H,  $\text{CH}_2\text{CH}_2\text{Cl}$ ), 2.10 (dd,  $J = 6.5, 2.4$  Hz, 1H,  $\text{NCH}_2$ ), 1.70 (d,  $J = 2.5$  Hz, 1H,  $\text{NCH}_2$ ), 1.43 (d,  $J = 2.4$  Hz, 1H,  $\text{NCH}_2$ ).  $^{13}\text{C}$  NMR ( $\delta$  (126 MHz,  $\text{CDCl}_3$ )  $\delta$  137.4 (Ar- $\text{C}_q$ ), 134.6 (Ar- $\text{C}_q$ ), 130.0 (Ar- $\text{C}_q$ ), 129.6 (Ar-C), 129.3 (Ar-C), 125.8 (Ar-C), 125.5 (Ar-C), 125.4 (Ar-C), 125.3 (Ar-C), 124.7 (Ar-C), 72.9 (COH), 57.9 ( $\text{NCH}_2$ ), 55.5 ( $\text{NCH}_2$ ), 43.9 ( $\text{CH}_2\text{CH}_2\text{Cl}$ ), 40.1 ( $\text{CH}_2\text{CH}_2\text{Cl}$ ), 38.5 ( $\text{NC}_q$ ). HRMS  $m/z$  calculated for  $\text{C}_{16}\text{H}_{16}\text{ClNNaO}$  [ $\text{M}+\text{Na}$ ] $^+$  296.0818; found 296.0830.

### 3-(2-(naphthalen-1-yl)oxetan-2-yl)-1-azabicyclo[1.1.0]butane 6d

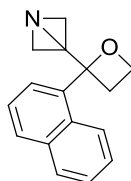

Following the GP2 with **13d**, **6d** was obtained as a pale yellow oil (43 mg, 90 %) without further purification. FT-IR  $\nu_{\max}/\text{cm}^{-1}$  2921, 2103, 1644, 1463, 1393, 1248, 1133, 965, 802, 778, 735.  $^1\text{H}$  NMR (500 MHz,  $\text{CDCl}_3$ )  $\delta$  7.93 – 7.85 (m, 1H, Ar-H), 7.81 (d,  $J = 8.2$  Hz, 2H, Ar-H), 7.72 (d,  $J = 7.0$  Hz, 1H, Ar-H), 7.55 – 7.45 (m, 3H, Ar-H), 4.72 (dd,  $J = 14.1, 7.0$  Hz, 1H,  $\text{OCH}_2\text{CH}_2$ ), 4.57 (dd,  $J = 14.8, 6.3$  Hz, 1H,  $\text{OCH}_2\text{CH}_2$ ), 3.28 (dd,  $J = 17.1, 8.8$  Hz, 1H,  $\text{OCH}_2\text{CH}_2$ ), 3.15 (dd,  $J = 17.7, 9.0$  Hz, 1H,  $\text{OCH}_2\text{CH}_2$ ), 2.63 (d,  $J = 6.4$  Hz, 1H,  $\text{NCH}_2$ ), 2.21 (d,  $J = 6.2$  Hz, 1H,  $\text{NCH}_2$ ), 1.43 (s, 1H,  $\text{NCH}_2$ ), 1.36 (s, 1H,  $\text{NCH}_2$ ).  $^{13}\text{C}$  NMR (126 MHz,  $\text{CDCl}_3$ )  $\delta$  139.2 (Ar- $\text{C}_q$ ), 134.1 (Ar- $\text{C}_q$ ), 129.3 (Ar- $\text{C}_q$ ), 129.1 (Ar-C), 128.5 (Ar-C), 125.8 (Ar-C), 125.6 (Ar-C), 125.4 (Ar-C), 124.9 (Ar-C), 123.2 (Ar-C), 84.8 ( $\text{OC}_q$ ), 66.7 ( $\text{OCH}_2\text{CH}_2$ ), 54.21 ( $\text{NCH}_2$ ), 53.39 ( $\text{NCH}_2$ ), 35.7 ( $\text{NC}_q$ ), 32.7 ( $\text{OCH}_2\text{CH}_2$ ). HRMS  $m/z$  calculated for  $\text{C}_{16}\text{H}_{15}\text{NNaO}$  [ $\text{M}+\text{Na}$ ] $^+$  260.1051; found 260.1046.

### 1-(1-azabicyclo[1.1.0]butan-3-yl)-3-chloro-1-(4-fluorophenyl)propan-1-ol 13e

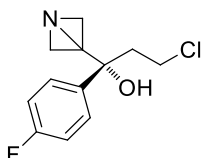

Following the GP1 with **12o** as electrophile, **13e** was obtained as a waxy yellow solid (84 mg, 84 %) after washing the crude with ethyl ether (4 mL). FT-IR  $\nu_{\max}/\text{cm}^{-1}$  3272, 2954, 1603, 1508, 1412, 1225, 1159, 1078, 915, 838, 816, 721.  $^1\text{H}$  NMR (500 MHz,  $\text{CDCl}_3$ )  $\delta$  7.48–7.43 (m, 2H, Ar-H), 7.08 – 7.04 (m, 2H, Ar-H), 3.62 (td,  $J = 11.0, 5.2$  Hz, 1H,  $\text{ClCH}_2$ ), 3.22 (td,  $J = 11.0, 5.1$  Hz, 1H,  $\text{ClCH}_2$ ), 2.59 (dd,  $J = 6.6, 2.4$  Hz, 1H,  $\text{NCH}_2$ ), 2.44 (ddd,  $J = 13.6, 11.2, 5.1$  Hz, 1H,  $\text{ClCH}_2\text{CH}_2$ ), 2.34 – 2.23 (m, 1H  $\text{NCH}_2$  and 1H  $\text{ClCH}_2\text{CH}_2$ ), 1.43 (d,  $J = 2.3$  Hz, 1H,  $\text{NCH}_2$ ), 1.27 (d,  $J = 2.5$  Hz, 1H,  $\text{NCH}_2$ ).  $^{13}\text{C}$  NMR (126 MHz,  $\text{CDCl}_3$ )  $\delta$  162.3 (d,  $^1J_{\text{C-F}} = 246.5$  Hz, Ar- $\text{C}_q$ ), 137.7 (d,  $^4J_{\text{C-F}} = 3.1$  Hz, Ar- $\text{C}_q$ ), 127.4 (d,  $^3J_{\text{C-F}} = 8.0$  Hz, 2 x Ar-C), 115.4 (d,  $^2J_{\text{C-F}} = 21.4$  Hz, 2 x Ar-C), 72.6 (COH), 54.1 ( $\text{NCH}_2$ ), 53.9 ( $\text{NCH}_2$ ), 44.0 ( $\text{ClCH}_2\text{CH}_2$ ), 39.5 ( $\text{ClCH}_2\text{CH}_2$ ), 37.8 ( $\text{NC}_q$ ).  $^{19}\text{F}$  NMR (282 MHz,  $\text{CDCl}_3$ ) -114.96 – -115.15 (m, 1F). HRMS  $m/z$  calculated for  $\text{C}_{12}\text{H}_{14}\text{ClFNO}$  [ $\text{M}+\text{H}$ ] $^+$  242.0748; found 242.0740.

### 3-(2-(4-fluorophenyl)oxetan-2-yl)-1-azabicyclo[1.1.0]butane **6e**

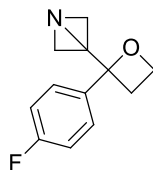

Following the GP2 with **13e**, **6e** was obtained as a pale yellow oil (32 mg, 79 %) without further purification. FT-IR  $\nu_{\max}/\text{cm}^{-1}$  3391, 2954, 2891, 1602, 1508, 1411, 1226, 1157, 1134, 969, 837, 817.  $^1\text{H}$  NMR (500 MHz,  $\text{CDCl}_3$ )  $\delta$  7.44 – 7.39 (m, 2H, Ar-H), 7.10 – 7.04 (m, 2H, Ar-H), 4.64 – 4.59 (m, 1H,  $\text{OCH}_2$ ), 4.57 – 4.51 (m, 1H,  $\text{OCH}_2$ ), 2.94 – 2.87 (m, 1H,  $\text{OCH}_2\text{CH}_2$ ), 2.78 – 2.71 (m, 1H,  $\text{OCH}_2\text{CH}_2$ ), 2.51 (dd,  $J = 6.6, 2.9$  Hz, 1H,  $\text{NCH}_2$ ), 2.39 (dd,  $J = 6.6, 2.6$  Hz, 1H,  $\text{NCH}_2$ ), 1.34 (d,  $J = 2.5$  Hz, 1H,  $\text{NCH}_2$ ), 1.28 (d,  $J = 3.2$  Hz, 1H,  $\text{NCH}_2$ ).  $^{13}\text{C}$  NMR (126 MHz,  $\text{CDCl}_3$ )  $\delta$  162.3 (d,  $^1J_{\text{C-F}} = 246.0$  Hz, Ar- $\text{C}_q$ ), 139.9 (d,  $^4J_{\text{C-F}} = 3.2$  Hz, Ar- $\text{C}_q$ ), 126.5 (d,  $^3J_{\text{C-F}} = 8.1$  Hz, 2 x Ar-C), 115.3 (d,  $^2J_{\text{C-F}} = 21.5$  Hz, 2 x Ar-C), 84.4 ( $\text{OC}_q$ ), 66.0 ( $\text{OCH}_2$ ), 53.2 ( $\text{NCH}_2$ ), 52.3 ( $\text{NCH}_2$ ), 35.3 ( $\text{NC}_q$ ), 31.7 ( $\text{OCH}_2\text{CH}_2$ ).  $^{19}\text{F}$  NMR (282 MHz,  $\text{CDCl}_3$ )  $\delta$  -115.02 -115.10 (m, 1F). HRMS  $m/z$  calculated for  $\text{C}_{12}\text{H}_{13}\text{FNO}$   $[\text{M}+\text{H}]^+$  206.0981; found 206.1015.

### 1-(1-azabicyclo[1.1.0]butan-3-yl)-3-chloro-1-(thiophen-2-yl)propan-1-ol **13f**

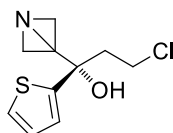

Following the GP1 with **12p** as electrophile, **13f** was obtained as a waxy yellow solid (76 mg, 80 %) after column chromatography ( $R_f = 0.3$ , hexane/EtOAc 7:3). FT-IR  $\nu_{\max}/\text{cm}^{-1}$  3400, 1651, 1404, 1233, 1190, 1077, 893, 848, 829, 701.  $^1\text{H}$  NMR (500 MHz,  $\text{CDCl}_3$ )  $\delta$  7.28 – 7.26 (m, 1H, Ar-H), 7.03 – 6.99 (m, 2H, Ar-H), 3.71 (td,  $J = 10.8, 5.6$  Hz, 1H,  $\text{ClCH}_2$ ), 3.48 (td,  $J = 10.8, 5.2$  Hz, 1H,  $\text{ClCH}_2$ ), 2.57 – 2.50 (m, 2H, 1H  $\text{ClCH}_2\text{CH}_2$  and 1H  $\text{NCH}_2$ ), 2.48 – 2.41 (m, 1H,  $\text{ClCH}_2\text{CH}_2$ ), 2.35 (dd,  $J = 6.6, 2.6$  Hz, 1H,  $\text{NCH}_2$ ), 1.38 (d,  $J = 2.5$  Hz, 1H,  $\text{NCH}_2$ ), 1.33 (d,  $J = 2.6$  Hz, 1H,  $\text{NCH}_2$ ).  $^{13}\text{C}$  NMR (126 MHz,  $\text{CDCl}_3$ )  $\delta$  146.6 (Ar- $\text{C}_q$ ), 127.2 (Ar-C), 125.1 (Ar-C), 124.0 (Ar-C), 72.5 (COH), 54.4 ( $\text{NCH}_2$ ), 53.3 ( $\text{NCH}_2$ ), 44.4 ( $\text{ClCH}_2\text{CH}_2$ ), 39.6 ( $\text{ClCH}_2\text{CH}_2$ ), 37.9 ( $\text{NC}_q$ ).

### 3-(2-(thiophen-2-yl)oxetan-2-yl)-1-azabicyclo[1.1.0]butane **6f**

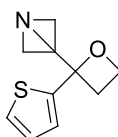

Following the GP2 with **13f**, **6f** was obtained as a pale yellow oil (32 mg, 82 %) without further purification. FT-IR  $\nu_{\max}/\text{cm}^{-1}$  2917, 2849, 2099, 1644, 1435, 1241, 1132, 949, 868, 818, 702.  $^1\text{H}$  NMR (500 MHz,  $\text{CDCl}_3$ )  $\delta$  7.34 (dd,  $J = 5.0, 1.3$  Hz, 1H, Ar-H), 7.15 (dd,  $J = 3.6, 1.2$  Hz, 1H, Ar-H), 7.04 (dd,  $J = 5.1, 3.5$  Hz, 1H, Ar-H), 4.67 – 4.60 (m, 1H,  $\text{OCH}_2$ ), 4.59 – 4.53 (m, 1H,  $\text{OCH}_2$ ), 2.90 – 2.84 (m, 2H,  $\text{OCH}_2\text{CH}_2$ ), 2.70 (dd,  $J = 6.5, 3.0$  Hz, 1H,  $\text{NCH}_2$ ), 2.48 (dd,  $J = 6.5, 2.5$  Hz, 1H,  $\text{NCH}_2$ ), 1.42 (d,  $J = 2.4$  Hz, 1H,  $\text{NCH}_2$ ), 1.38 (d,  $J = 3.1$  Hz, 1H,  $\text{NCH}_2$ ).  $^{13}\text{C}$  NMR (126 MHz,  $\text{CDCl}_3$ )  $\delta$  148.4 (Ar- $\text{C}_q$ ), 127.2 (Ar-C), 125.8 (Ar-C), 124.0 (Ar-C), 82.6 ( $\text{OC}_q$ ), 66.0 ( $\text{OCH}_2$ ), 53.6 ( $\text{NCH}_2$ ), 52.3 ( $\text{NCH}_2$ ), 35.1 ( $\text{NC}_q$ ), 32.7 ( $\text{OCH}_2\text{CH}_2$ ). HRMS  $m/z$  calculated for  $\text{C}_{10}\text{H}_{11}\text{NNaOS}$   $[\text{M}+\text{Na}]^+$  216.0459; found 216.0454.

### 1-(1-azabicyclo[1.1.0]butan-3-yl)-4-chloro-1-phenylbutan-1-ol **13g**

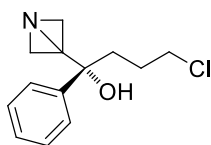

Following the GP1 with **12q** as electrophile, **13g** was obtained as a waxy white solid (93 mg, 95 %) after washing the crude with ethyl ether (4 mL). FT-IR  $\nu_{\max}/\text{cm}^{-1}$  3400, 1654, 1637, 1447, 1310, 1131, 1068, 910, 824, 768, 704, 616.  $^1\text{H}$  NMR (500 MHz,  $\text{CDCl}_3$ )  $\delta$  7.50 – 7.46 (m, 2H, Ar-H), 7.38 – 7.35 (m, 2H, Ar-H), 7.29 – 7.26 (m, 1H, Ar-H), 3.46 (t,  $J = 6.4$  Hz, 2H,  $\text{CH}_2\text{CH}_2\text{CH}_2\text{Cl}$ ), 2.81 (bs, OH), 2.63 (dd,  $J = 6.6, 2.6$  Hz, 1H,  $\text{NCH}_2$ ), 2.30 (dd,  $J = 6.6, 2.7$  Hz, 1H,  $\text{NCH}_2$ ), 2.19 – 2.11 (m, 1H,  $\text{CH}_2\text{CH}_2\text{CH}_2\text{Cl}$ ), 1.99 – 1.86 (m, 1H  $\text{CH}_2\text{CH}_2\text{CH}_2\text{Cl}$  and 1H  $\text{CH}_2\text{CH}_2\text{CH}_2\text{Cl}$ ), 1.60 – 1.51 (m, 1H,  $\text{CH}_2\text{CH}_2\text{CH}_2\text{Cl}$ ), 1.41 (d,  $J = 2.4$  Hz, 1H,  $\text{NCH}_2$ ), 1.24 (d,  $J = 2.7$  Hz, 1H,  $\text{NCH}_2$ ).  $^{13}\text{C}$ -NMR (126 MHz,  $\text{CDCl}_3$ )  $\delta$  142.8 (Ar- $\text{C}_q$ ), 128.3 (2 x Ar-C), 127.4 (Ar-C), 125.7 (2 x Ar-C), 73.0 (OH- $\text{C}_q$ ), 54.1 ( $\text{NCH}_2$ ), 53.96 ( $\text{NCH}_2$ ), 45.6 ( $\text{CH}_2\text{CH}_2\text{CH}_2\text{Cl}$ ), 38.1 ( $\text{CH}_2\text{CH}_2\text{CH}_2\text{Cl}$ ), 31.7 ( $\text{NC}_q$ ), 26.7 ( $\text{CH}_2\text{CH}_2\text{CH}_2\text{Cl}$ ). HRMS  $m/z$  calculated for  $\text{C}_{13}\text{H}_{17}\text{ClNO}$   $[\text{M}+\text{H}]^+$  238.0999; found 238.0995.

### 3-(2-phenyltetrahydrofuran-2-yl)-1-azabicyclo[1.1.0]butane 7a

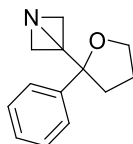

Following the GP2 with **13g**, **7a** was obtained as a pale yellow oil (27 mg, 67 %) without further purification. FT-IR  $\nu_{\max}/\text{cm}^{-1}$  3434, 3058, 2947, 1668, 1448, 1386, 1225, 1132, 1057, 992, 820, 768, 703.  $^1\text{H}$  NMR (500 MHz,  $\text{CDCl}_3$ )  $\delta$  7.47 – 7.44 (m, 2H, Ar-H), 7.36 – 7.32 (m, 2H, Ar-H), 7.29 – 7.24 (m, 1H, Ar-H overlapping  $\text{CHCl}_3$ ), 4.06 (dd,  $J = 14.4, 7.6$  Hz, 1H,  $\text{OCH}_2\text{CH}_2\text{CH}_2$ ), 3.99 (td,  $J = 7.8, 6.0$  Hz, 1H,  $\text{OCH}_2\text{CH}_2\text{CH}_2$ ), 2.36 (dd,  $J = 6.6, 3.0$  Hz, 1H,  $\text{NCH}_2$ ), 2.31 – 2.25 (m, 1H,  $\text{OCH}_2\text{CH}_2\text{CH}_2$ ), 2.23 (dd,  $J = 6.6, 2.8$  Hz, 1H,  $\text{NCH}_2$ ), 2.21 – 2.14 (m, 1H,  $\text{OCH}_2\text{CH}_2\text{CH}_2$ ), 2.09 – 2.01 (m, 1H,  $\text{OCH}_2\text{CH}_2\text{CH}_2$ ), 1.94 – 1.85 (m, 1H,  $\text{OCH}_2\text{CH}_2\text{CH}_2$ ), 1.17 (d,  $J = 2.7$  Hz, 1H,  $\text{NCH}_2$ ), 1.13 (d,  $J = 3.0$  Hz, 1H,  $\text{NCH}_2$ ).  $^{13}\text{C}$  NMR (126 MHz,  $\text{CDCl}_3$ )  $\delta$  144.1 (Ar- $\text{C}_q$ ), 128.3 (2 x Ar-C), 127.3 (Ar-C), 125.7 (2 x Ar-C), 83.4 ( $\text{OC}_q$ ), 68.9 ( $\text{OCH}_2\text{CH}_2\text{CH}_2$ ), 52.8 ( $\text{NCH}_2$ ), 52.3 ( $\text{NCH}_2$ ), 36.3 ( $\text{OCH}_2\text{CH}_2\text{CH}_2$ ), 35.9 ( $\text{NC}_q$ ), 26.0 ( $\text{OCH}_2\text{CH}_2\text{CH}_2$ ). HRMS  $m/z$  calculated for  $\text{C}_{13}\text{H}_{16}\text{NO}$   $[\text{M}+\text{H}]^+$  202.1232; found 202.1225.

### 1-(1-azabicyclo[1.1.0]butan-3-yl)-4-chloro-1-(4-methoxyphenyl)butan-1-ol 13h

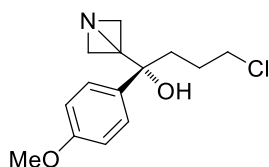

Following the GP1 with **12r** as electrophile, **13h** was obtained as a waxy white solid (109 mg, 99 %) after washing the crude with ethyl ether (4 mL). FT-IR  $\nu_{\max}/\text{cm}^{-1}$  3293, 2956, 1722, 1610, 1512, 1462, 1250, 1175, 1101, 1033, 913, 833, 764, 748.  $^1\text{H}$  NMR (500 MHz,  $\text{CDCl}_3$ )  $\delta$  7.39 (d,  $J = 8.8$  Hz, 2H, Ar-H), 6.89 (d,  $J = 8.8$  Hz, 2H, Ar-H), 3.81 (s, 3H,  $\text{OCH}_3$ ), 3.46 (t,  $J = 6.4$  Hz, 2H,  $\text{CH}_2\text{Cl}$ ), 2.58 (dd,  $J = 6.6, 2.5$  Hz, 1H,  $\text{NCH}_2$ ), 2.29 (dd,  $J = 6.6, 2.6$  Hz, 1H,  $\text{NCH}_2$ ), 2.14 – 2.06 (m, 1H,  $\text{CH}_2\text{CH}_2\text{Cl}$ ), 1.98 – 1.84 (m, 2H, 1H  $\text{CH}_2\text{CH}_2\text{CH}_2\text{Cl}$  and 1H  $\text{CH}_2\text{CH}_2\text{CH}_2\text{Cl}$ ), 1.62 – 1.53 (m, 1H,  $\text{CH}_2\text{CH}_2\text{CH}_2\text{Cl}$ ), 1.38 (d,  $J = 2.4$  Hz, 1H,  $\text{NCH}_2$ ), 1.22 (d,  $J = 2.5$  Hz, 1H,  $\text{NCH}_2$ ).  $^{13}\text{C}$  NMR (126 MHz,  $\text{CDCl}_3$ )  $\delta$  158.8 (Ar- $\text{C}_q$ ), 135.9 (Ar- $\text{C}_q$ ), 126.9 (2 x Ar-C), 113.7 (2 x Ar-C), 72.6 (COH), 55.4 ( $\text{OCH}_3$ ), 53.8 (bs,  $\text{NCH}_2$ ), 53.7 (bs,  $\text{NCH}_2$ ), 45.6 ( $\text{CH}_2\text{Cl}$ ), 38.2 ( $\text{NC}_q$ ), 38.0 ( $\text{CH}_2\text{CH}_2\text{Cl}$ ), 26.8 ( $\text{CH}_2\text{CH}_2\text{CH}_2\text{Cl}$ ). HRMS  $m/z$  calculated for  $\text{C}_{14}\text{H}_{18}\text{ClNNaO}_2$   $[\text{M}+\text{Na}]^+$  290.0918; found 290.0867.

### 3-(2-(4-methoxyphenyl)tetrahydrofuran-2-yl)-1-azabicyclo[1.1.0]butane 7b



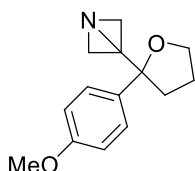

Following the GP2 with **13h**, **7b** was obtained as a pale yellow oil (36 mg, 77 %) without further purification. FT-IR  $\nu_{\max}/\text{cm}^{-1}$  2949, 1722, 1610, 1510, 1462, 1247, 1175, 1100, 1057, 1034, 960, 832, 730.  $^1\text{H}$  NMR (500 MHz,  $\text{CDCl}_3$ )  $\delta$  7.36 (d,  $J = 8.9$  Hz, 2H, Ar-H), 6.87 (d,  $J = 8.8$  Hz, 2H, Ar-H), 4.05 – 4.00 (m, 1H,  $\text{OCH}_2$ ), 3.99 – 3.92 (m, 1H,  $\text{OCH}_2$ ), 3.79 (s, 3H,  $\text{CH}_3$ ), 2.32 (dd,  $J = 6.6, 3.0$  Hz, 1H,  $\text{NCH}_2$ ), 2.28 – 2.17 (m, 2H, 1H  $\text{OCH}_2\text{CH}_2$  and 1H,  $\text{NCH}_2$ ), 2.18 – 2.11 (m, 1H,  $\text{OCH}_2\text{CH}_2$ ), 2.08 – 1.98 (m, 1H,  $\text{OCH}_2\text{CH}_2\text{CH}_2$ ), 1.94 – 1.84 (m, 1H,  $\text{OCH}_2\text{CH}_2\text{CH}_2$ ), 1.14 (d,  $J = 2.7$  Hz, 1H,  $\text{NCH}_2$ ), 1.12 (d,  $J = 2.7$  Hz, 1H,  $\text{NCH}_2$ ).  $^{13}\text{C}$  NMR (126 MHz,  $\text{CDCl}_3$ )  $\delta$  158.8 (Ar- $\text{C}_q$ ), 136.1 (Ar- $\text{C}_q$ ), 126.9 (2 x Ar-C), 113.6 (2 x Ar-C), 83.1 ( $\text{OC}_q$ ), 68.7 ( $\text{OCH}_2$ ), 55.4 ( $\text{OCH}_3$ ), 52.7 ( $\text{NCH}_2$ ), 52.3 ( $\text{NCH}_2$ ), 36.2 ( $\text{OCH}_2\text{CH}_2$ ), 35.9 ( $\text{NC}_q$ ), 26.0 ( $\text{OCH}_2\text{CH}_2\text{CH}_2$ ). HRMS  $m/z$  calculated for  $\text{C}_{14}\text{H}_{17}\text{NNaO}_2$   $[\text{M}+\text{Na}]^+$  254.1151; found 254.1156.

### 1-(1-azabicyclo[1.1.0]butan-3-yl)-4-chloro-1-(p-tolyl)butan-1-ol **13i**

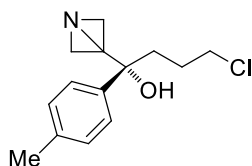

Following the GP1 with **12s** as electrophile, **13i** was obtained as a white solid (62 mg, 60 %) after washing the crude with ethyl ether (4 mL). M.p. 110-112°C. FT-IR  $\nu_{\max}/\text{cm}^{-1}$  3247, 2920, 2851, 1661, 1510, 1439, 1384, 1218, 1105, 1043, 820, 740.  $^1\text{H}$  NMR (500 MHz,  $\text{CDCl}_3$ )  $\delta$  7.36 (d,  $J = 8.2$  Hz, 2H, Ar-H), 7.17 (d,  $J = 8.0$  Hz, 2H, Ar-H), 3.45 (t,  $J = 6.4$  Hz, 2H,  $\text{CH}_2\text{CH}_2\text{CH}_2\text{Cl}$ ), 2.64 – 2.60 (m, 1H,  $\text{NCH}_2$ ), 2.34 (s, 3H,  $\text{CH}_3$ ), 2.32 – 2.28 (m, 1H,  $\text{NCH}_2$ ), 2.11 (ddd,  $J = 14.5, 11.6, 4.7$  Hz, 1H,  $\text{CH}_2\text{CH}_2\text{CH}_2\text{Cl}$ ), 1.97 – 1.85 (m, 1H  $\text{CH}_2\text{CH}_2\text{CH}_2\text{Cl}$  and 1H  $\text{CH}_2\text{CH}_2\text{CH}_2\text{Cl}$ ), 1.62 – 1.52 (m, 1H,  $\text{CH}_2\text{CH}_2\text{CH}_2\text{Cl}$ ), 1.39 (d,  $J = 2.6$  Hz, 1H,  $\text{NCH}_2$ ), 1.21 (d,  $J = 2.7$  Hz, 1H,  $\text{NCH}_2$ ).  $^{13}\text{C}$  NMR (126 MHz,  $\text{CDCl}_3$ )  $\delta$  139.9 (Ar- $\text{C}_q$ ), 136.9 (Ar- $\text{C}_q$ ), 129.0 (2 x Ar-C), 125.6 (2 x Ar-C), 72.8 ( $\text{COH}$ ), 53.72 ( $\text{NCH}_2$ ), 53.70 ( $\text{NCH}_2$ ), 45.6 ( $\text{CH}_2\text{CH}_2\text{CH}_2\text{Cl}$ ), 38.3 ( $\text{NC}_q$ ), 37.9 ( $\text{CH}_2\text{CH}_2\text{CH}_2\text{Cl}$ ), 26.7 ( $\text{CH}_2\text{CH}_2\text{CH}_2\text{Cl}$ ), 21.1 ( $\text{CH}_3$ ). HRMS  $m/z$  calculated for  $\text{C}_{14}\text{H}_{18}\text{ClNNaO}$   $[\text{M}+\text{Na}]^+$  274.0975; found 274.0978.

### 3-(2-(p-tolyl)tetrahydrofuran-2-yl)-1-azabicyclo[1.1.0]butane **7c**

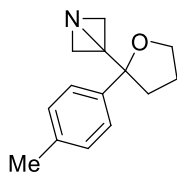

Following the GP2 with **13i**, **7c** was obtained as a pale yellow oil (33 mg, 77 %) without further purification. FT-IR  $\nu_{\max}/\text{cm}^{-1}$  2945, 2874, 1721, 1667, 1511, 1455, 1408, 1183, 1131, 1058, 1021, 959, 816.  $^1\text{H}$  NMR (500 MHz,  $\text{CDCl}_3$ )  $\delta$  7.36 – 7.32 (m, 2H, Ar-H), 7.15 (d,  $J = 7.9$  Hz, 2H, Ar-H), 4.04 (dd,  $J = 14.3, 7.6$  Hz, 1H,  $\text{OCH}_2\text{CH}_2\text{CH}_2$ ), 3.97 (td,  $J = 7.8, 5.9$  Hz, 1H,  $\text{OCH}_2\text{CH}_2\text{CH}_2$ ), 2.36 – 2.32 (m, 1H,  $\text{NCH}_2$ ), 2.34 (s, 3H,  $\text{CH}_3$ ), 2.28 – 2.21 (m, 1H  $\text{NCH}_2$  and 1H  $\text{OCH}_2\text{CH}_2\text{CH}_2$ ), 2.16 (ddd,  $J = 12.3, 7.9, 6.0$  Hz, 1H,  $\text{OCH}_2\text{CH}_2\text{CH}_2$ ), 2.08 – 1.99 (m, 1H,  $\text{OCH}_2\text{CH}_2\text{CH}_2$ ), 1.94 – 1.84 (m, 1H,  $\text{OCH}_2\text{CH}_2\text{CH}_2$ ), 1.16 (d,  $J = 2.9$  Hz, 1H,  $\text{NCH}_2$ ), 1.12 (d,  $J = 3.2$  Hz, 1H,  $\text{NCH}_2$ ).  $^{13}\text{C}$  NMR (126 MHz,  $\text{CDCl}_3$ )  $\delta$  141.1 (Ar- $\text{C}_q$ ), 136.8 (Ar- $\text{C}_q$ ), 128.9 (2 x Ar-C), 125.6 (2 x Ar-C), 83.3 ( $\text{OC}_q$ ), 68.8 ( $\text{OCH}_2\text{CH}_2\text{CH}_2$ ), 52.7 ( $\text{NCH}_2$ ), 52.3 ( $\text{NCH}_2$ ), 36.2 ( $\text{OCH}_2\text{CH}_2\text{CH}_2$ ), 35.9 ( $\text{NC}_q$ ), 26.0 ( $\text{OCH}_2\text{CH}_2\text{CH}_2$ ), 21.2 ( $\text{CH}_3$ ). HRMS  $m/z$  calculated for  $\text{C}_{14}\text{H}_{17}\text{NNaO}$   $[\text{M}+\text{Na}]^+$  238.1208; found 238.1209.

### 1-(1-azabicyclo[1.1.0]butan-3-yl)-4-chloro-1-(naphthalen-1-yl)butan-1-ol **13j**

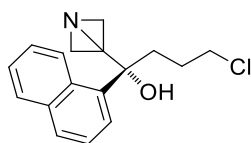

Following the GP1 with **12t** as electrophile, **13j** was obtained as a pale yellow oil (77 mg, 65 %) after column chromatography ( $R_f = 0.4$ , hexane/EtOAc 8:2). FT-IR  $\nu_{\max}/\text{cm}^{-1}$  3429, 2091, 1644, 1509, 1444, 1389, 1280, 1216, 1174, 1133, 1074, 904, 802, 779.  $^1\text{H NMR}$  (500 MHz,  $\text{CDCl}_3$ )  $\delta$  8.45 (d,  $J = 8.3$  Hz, 1H, Ar-H), 7.91 (d,  $J = 7.4$  Hz, 1H, Ar-H), 7.89 (d,  $J = 7.6$  Hz, 1H, Ar-H), 7.80 (d,  $J = 8.2$  Hz, 1H, Ar-H), 7.53 – 7.43 (m, 3H, Ar-H), 3.42 – 3.31 (m, 2H,  $\text{CH}_2\text{Cl}$ ), 2.94 (dd,  $J = 6.5, 2.2$  Hz, 1H,  $\text{NCH}_2$ ), 2.69 – 2.62 (m, 1H,  $\text{CH}_2\text{CH}_2\text{CH}_2\text{Cl}$ ), 2.20 – 2.11 (m, 2H, 1H  $\text{CH}_2\text{CH}_2\text{CH}_2\text{Cl}$  and 1H  $\text{NCH}_2$ ), 1.90 – 1.79 (m, 1H,  $\text{CH}_2\text{CH}_2\text{CH}_2\text{Cl}$ ), 1.68 (d,  $J = 1.9$  Hz, 1H,  $\text{NCH}_2$ ), 1.40 (d,  $J = 1.5$  Hz, 1H,  $\text{NCH}_2$ ), 1.37 – 1.28 (m, 1H,  $\text{CH}_2\text{CH}_2\text{CH}_2\text{Cl}$ ).  $^{13}\text{C NMR}$  (126 MHz,  $\text{CDCl}_3$ )  $\delta$  138.4 (Ar- $\text{C}_q$ ), 134.6 (Ar- $\text{C}_q$ ), 130.1 (Ar- $\text{C}_q$ ), 129.5 (Ar-C), 128.9 (Ar-C), 125.8 (Ar-C), 125.6 (Ar-C), 125.3 (Ar-C), 125.2 (Ar-C), 125.0 (Ar-C), 73.3 (COH), 57.3 ( $\text{NCH}_2$ ), 55.6 ( $\text{NCH}_2$ ), 45.4 ( $\text{CH}_2\text{Cl}$ ), 38.6 ( $\text{NC}_q$ ), 38.1 ( $\text{CH}_2\text{CH}_2\text{CH}_2\text{Cl}$ ), 27.4 ( $\text{CH}_2\text{CH}_2\text{CH}_2\text{Cl}$ ). HRMS  $m/z$  calculated for  $\text{C}_{17}\text{H}_{18}\text{ClNNaO}$  [ $\text{M}+\text{Na}$ ] $^+$  310.0975; found 310.0969.

### 3-(2-(naphthalen-1-yl)tetrahydrofuran-2-yl)-1-azabicyclo[1.1.0]butane 7d

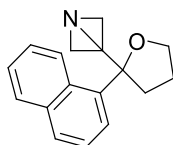

Following the GP2 with **13j**, **7d** was obtained as a pale yellow oil (45 mg, 90 %) without further purification. FT-IR  $\nu_{\max}/\text{cm}^{-1}$  3433, 2102, 1645, 1509, 1393, 1297, 1252, 1132, 1072, 1054, 920, 821, 802, 778, 732.  $^1\text{H NMR}$  (500 MHz,  $\text{CDCl}_3$ )  $\delta$  8.29 (d,  $J = 8.3$  Hz, 1H, Ar-H), 7.88 – 7.83 (m, 2H, Ar-H), 7.77 (d,  $J = 8.2$  Hz, 1H, Ar-H), 7.50 – 7.43 (m, 3H, Ar-H), 4.12 (td,  $J = 7.7, 5.6$  Hz, 1H,  $\text{OCH}_2$ ), 3.97 (dd,  $J = 15.1, 7.0$  Hz, 1H,  $\text{OCH}_2$ ), 2.69 (ddd,  $J = 12.6, 8.3, 6.0$  Hz, 1H,  $\text{OCH}_2\text{CH}_2\text{CH}_2$ ), 2.60 – 2.53 (m, 1H,  $\text{OCH}_2\text{CH}_2\text{CH}_2$ ), 2.47 (dd,  $J = 6.6, 2.9$  Hz, 1H,  $\text{NCH}_2$ ), 2.13 (dd,  $J = 6.6, 2.9$  Hz, 1H,  $\text{NCH}_2$ ), 2.12 – 2.04 (m, 1H,  $\text{OCH}_2\text{CH}_2\text{CH}_2$ ), 1.96 – 1.86 (m, 1H,  $\text{OCH}_2\text{CH}_2\text{CH}_2$ ), 1.25 (d,  $J = 2.9$  Hz, 1H,  $\text{NCH}_2$ ), 1.16 (d,  $J = 2.9$  Hz, 1H,  $\text{NCH}_2$ ).  $^{13}\text{C NMR}$  (126 MHz,  $\text{CDCl}_3$ )  $\delta$  139.7 (Ar- $\text{C}_q$ ), 134.6 (Ar- $\text{C}_q$ ), 130.6 (Ar- $\text{C}_q$ ), 129.1 (Ar-C), 128.6 (Ar-C), 126.4 (Ar-C), 125.39 (Ar-C), 125.37 (Ar-C), 125.22 (Ar-C), 123.9 (Ar-C), 83.9 ( $\text{OC}_q$ ), 68.3 ( $\text{OCH}_2$ ), 53.99 ( $\text{NCH}_2$ ), 53.14 ( $\text{NCH}_2$ ), 37.4 ( $\text{OCH}_2\text{CH}_2$ ), 36.4 ( $\text{NC}_q$ ), 26.7 ( $\text{OCH}_2\text{CH}_2\text{CH}_2$ ). HRMS  $m/z$  calculated for  $\text{C}_{17}\text{H}_{17}\text{NNaO}$  [ $\text{M}+\text{Na}$ ] $^+$  274.1208; found 274.1214.

### 1-(1-azabicyclo[1.1.0]butan-3-yl)-4-chloro-1-(naphthalen-2-yl)butan-1-ol 13k

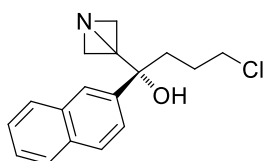

Following the GP1 with **12u** as electrophile, **13k** was obtained as a pale yellow oil (89 mg, 75 %) after column chromatography ( $R_f = 0.3$ , hexane/EtOAc 8:2). FT-IR  $\nu_{\max}/\text{cm}^{-1}$  3400, 2099, 1508, 1445, 1309, 1178, 1131, 902, 857, 819, 752, 647.  $^1\text{H NMR}$  (500 MHz,  $\text{CDCl}_3$ )  $\delta$  8.00 (s, 1H, Ar-H), 7.92 – 7.80 (m,  $J = 7.9$  Hz, 3H, Ar-H), 7.55 (d,  $J = 8.6$  Hz, 1H, Ar-H), 7.52 – 7.46 (m, 2H, Ar-H), 3.55 – 3.38 (m, 2H,  $\text{CH}_2\text{Cl}$ ), 2.68 (dd,  $J = 6.5, 2.7$  Hz, 1H,  $\text{NCH}_2$ ), 2.33 – 2.24 (m, 2H, 1H  $\text{NCH}_2$  and 1H  $\text{CH}_2\text{CH}_2\text{CH}_2\text{Cl}$ ), 2.08 – 2.01 (m, 1H,  $\text{CH}_2\text{CH}_2\text{CH}_2\text{Cl}$ ), 1.98 – 1.88 (m, 1H,  $\text{CH}_2\text{CH}_2\text{CH}_2\text{Cl}$ ), 1.60 – 1.49 (m, 1H,  $\text{CH}_2\text{CH}_2\text{CH}_2\text{Cl}$ ), 1.46 (s, 1H,  $\text{NCH}_2$ ), 1.28 (d,  $J = 2.0$  Hz, 1H,  $\text{NCH}_2$ ).  $^{13}\text{C NMR}$  (126 MHz,  $\text{CDCl}_3$ )  $\delta$  140.2 (Ar- $\text{C}_q$ ), 133.2 (Ar- $\text{C}_q$ ), 132.7 (Ar- $\text{C}_q$ ), 128.4 (Ar-C), 128.1 (Ar-C), 127.7 (Ar-C), 126.4 (Ar-C), 126.2 (Ar-C), 124.6 (Ar-C), 124.0 (Ar-C), 73.2 (COH), 54.4 ( $\text{NCH}_2$ ), 54.1 ( $\text{NCH}_2$ ), 45.5 ( $\text{CH}_2\text{Cl}$ ), 38.2 ( $\text{NC}_q$ ), 37.9 ( $\text{CH}_2\text{CH}_2\text{CH}_2\text{Cl}$ ), 26.8 ( $\text{CH}_2\text{CH}_2\text{CH}_2\text{Cl}$ ). HRMS  $m/z$  calculated for  $\text{C}_{17}\text{H}_{18}\text{ClNNaO}$  [ $\text{M}+\text{Na}$ ] $^+$  310.0975; found 310.0976.

### 3-(2-(naphthalen-2-yl)tetrahydrofuran-2-yl)-1-azabicyclo[1.1.0]butane 7e

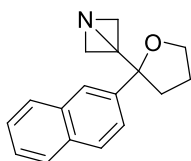

Following the GP2 with **13k**, **7e** was obtained as a pale yellow oil (45 mg, 90 %) without further purification. FT-IR  $\nu_{\max}/\text{cm}^{-1}$  3432, 2110, 1647, 1507, 1462, 1272, 1193, 1131, 1058, 906, 857, 820, 749.  $^1\text{H}$  NMR (500 MHz,  $\text{CDCl}_3$ )  $\delta$  7.96 (s, 1H, Ar-H), 7.88 – 7.80 (m, 3H, Ar-H), 7.54 (dd,  $J = 8.6, 1.8$  Hz, 1H, Ar-H), 7.51 – 7.43 (m, 2H, Ar-H), 4.15 – 4.04 (m, 2H,  $\text{OCH}_2$ ), 2.39 (dd,  $J = 6.6, 3.0$  Hz, 1H,  $\text{NCH}_2$ ), 2.38 – 2.33 (m, 1H,  $\text{OCH}_2\text{CH}_2$ ), 2.32 – 2.25 (m, 2H, 1H  $\text{OCH}_2\text{CH}_2$  and 1H  $\text{NCH}_2$ ), 2.13 – 2.05 (m, 1H,  $\text{OCH}_2\text{CH}_2\text{CH}_2$ ), 1.98 – 1.88 (m, 1H,  $\text{OCH}_2\text{CH}_2\text{CH}_2$ ), 1.20 (d,  $J = 2.7$  Hz, 1H,  $\text{NCH}_2$ ), 1.16 (d,  $J = 3.0$  Hz, 1H,  $\text{NCH}_2$ ).  $^{13}\text{C}$  NMR (126 MHz,  $\text{CDCl}_3$ )  $\delta$  141.5 (Ar- $\text{C}_q$ ), 133.2 (Ar- $\text{C}_q$ ), 132.7 (Ar- $\text{C}_q$ ), 128.3 (Ar-C), 128.0 (Ar-C), 127.7 (Ar-C), 126.2 (Ar-C), 126.0 (Ar-C), 124.3 (Ar-C), 124.2 (Ar-C), 83.6 ( $\text{OC}_q$ ), 69.0 ( $\text{OCH}_2\text{CH}_2\text{CH}_2$ ), 52.8 ( $\text{NCH}_2$ ), 52.5 ( $\text{NCH}_2$ ), 36.2 ( $\text{OCH}_2\text{CH}_2\text{CH}_2$ ), 35.9 ( $\text{NC}_q$ ), 26.1 ( $\text{OCH}_2\text{CH}_2\text{CH}_2$ ). HRMS  $m/z$  calculated for  $\text{C}_{17}\text{H}_{17}\text{NNaO}$   $[\text{M}+\text{Na}]^+$  274.1208; found 274.1209.

### 1-(1-azabicyclo[1.1.0]butan-3-yl)-4-chloro-1-(4-fluorophenyl)butan-1-ol 13l

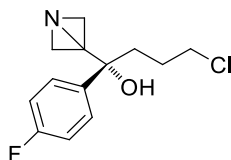

Following the GP1 with **12v** as electrophile, **13l** was obtained as a pale yellow waxy solid (86 mg, 81 %) after washing the crude with ethyl ether (4 mL). FT-IR  $\nu_{\max}/\text{cm}^{-1}$  2956, 2917, 1686, 1601, 1506, 1414, 1306, 1225, 1157, 1012, 908, 834.  $^1\text{H}$  NMR (500 MHz,  $\text{CDCl}_3$ )  $\delta$  7.50 – 7.43 (m, 2H, Ar-H), 7.04 (t,  $J = 8.7$  Hz, 2H, Ar-H), 3.46 (t,  $J = 6.2$  Hz, 2H,  $\text{CH}_2\text{Cl}$ ), 2.61 (dd,  $J = 6.6, 2.5$  Hz, 1H,  $\text{NCH}_2$ ), 2.33 – 2.30 (m, 1H,  $\text{NCH}_2$ ), 2.14 – 2.05 (m, 1H,  $\text{CH}_2\text{CH}_2\text{Cl}$ ), 1.97 – 1.85 (m, 2H, 1H  $\text{CH}_2\text{CH}_2\text{CH}_2\text{Cl}$  and 1H  $\text{CH}_2\text{CH}_2\text{CH}_2\text{Cl}$ ), 1.58 – 1.47 (m, 1H,  $\text{CH}_2\text{CH}_2\text{CH}_2\text{Cl}$ ), 1.41 (d,  $J = 2.4$  Hz, 1H,  $\text{NCH}_2$ ), 1.23 (d,  $J = 2.6$  Hz, 1H,  $\text{NCH}_2$ ).  $^{13}\text{C}$  NMR (126 MHz,  $\text{CDCl}_3$ )  $\delta$  162.1 (d,  $^1J_{\text{C-F}} = 245.7$  Hz, Ar-CF), 138.7 (d,  $^4J_{\text{C-F}} = 3.1$  Hz, Ar- $\text{C}_q$ ), 127.5 (d,  $^3J_{\text{C-F}} = 8.0$  Hz, 2 x Ar-C), 115.2 (d,  $^2J_{\text{C-F}} = 21.4$  Hz, 2 x Ar-C), 72.6 (COH), 53.9 ( $\text{NCH}_2$ ), 53.6 ( $\text{NCH}_2$ ), 45.4 ( $\text{CH}_2\text{Cl}$ ), 38.2 ( $\text{NC}_q$ ), 38.0 ( $\text{CH}_2\text{CH}_2\text{Cl}$ ), 26.6 ( $\text{CH}_2\text{CH}_2\text{CH}_2\text{Cl}$ ).  $^{19}\text{F}$  NMR (470 MHz,  $\text{CDCl}_3$ )  $\delta$  -115.63 – -115.75 (m, 1F).

### 3-(2-(4-fluorophenyl)tetrahydrofuran-2-yl)-1-azabicyclo[1.1.0]butane 7f

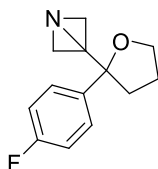

Following the GP2 with **13l**, **7f** was obtained as a pale yellow oil (43 mg, 99 %) without further purification. FT-IR  $\nu_{\max}/\text{cm}^{-1}$  1644, 1506, 1296, 1221, 1157, 1131, 1055, 1015, 960, 835, 744.  $^1\text{H}$  NMR (300 MHz,  $\text{CDCl}_3$ )  $\delta$  7.47 – 7.34 (m, 2H, Ar-H), 7.07 – 6.95 (m, 2H, Ar-H), 4.09 – 3.91 (m, 2H,  $\text{OCH}_2$ ), 2.35 – 1.81 (m, 6H, 4H  $\text{CH}_2\text{CH}_2\text{CH}_2\text{O}$  and 2H  $\text{NCH}_2$ ), 1.16 (d,  $J = 2.7$  Hz, 1H,  $\text{NCH}_2$ ), 1.13 (d,  $J = 2.9$  Hz, 1H,  $\text{NCH}_2$ ).  $^{13}\text{C}$  NMR (126 MHz,  $\text{CDCl}_3$ )  $\delta$  162.1 (d,  $^1J_{\text{C-F}} = 245.2$  Hz, Ar- $\text{C}_q$ ), 139.8 (d,  $^4J_{\text{C-F}} = 3.1$  Hz, Ar- $\text{C}_q$ ), 127.4 (d,  $^3J_{\text{C-F}} = 8.0$  Hz, 2 x Ar-C), 115.0 (d,  $^2J_{\text{C-F}} = 21.3$  Hz, Ar-C), 83.2 ( $\text{OC}_q$ ), 68.8 ( $\text{OCH}_2$ ), 52.7 (bs,  $\text{NCH}_2$ ), 52.3 (bs,  $\text{NCH}_2$ ), 36.4 ( $\text{OCH}_2\text{CH}_2$ ), 35.7 ( $\text{NC}_q$ ), 26.0 ( $\text{OCH}_2\text{CH}_2\text{CH}_2$ ).  $^{19}\text{F}$  NMR (282 MHz,  $\text{CDCl}_3$ )  $\delta$  -115.93 – -116.03 (m, 1F). HRMS  $m/z$  calculated for  $\text{C}_{13}\text{H}_{14}\text{FNNaO}$   $[\text{M}+\text{Na}]^+$  242.0957; found 242.0958.

### **tert-butyl 3-chloro-3-(2-phenyloxiran-2-yl)azetidine-1-carboxylate **8a****

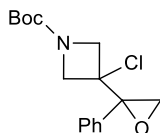

Following the GP3 with **5a**, LiCl (0.25 mmol) and Boc<sub>2</sub>O, **8a** was obtained as a pale yellow oil (70 mg, 90 %) after column chromatography ( $R_f = 0.55$ , hexane/EtOAc 7:3). FT-IR  $\nu_{\max}/\text{cm}^{-1}$  2979, 1809, 1706, 1394, 1368, 1258, 1156, 1119, 1073, 912, 734, 700. <sup>1</sup>H NMR (500 MHz, CDCl<sub>3</sub>)  $\delta$  7.52 – 7.48 (m, 2H, Ar-H), 7.39 – 7.34 (m, 3H, Ar-H), 4.34 (d,  $J = 9.4$  Hz, 2H, NCH<sub>2</sub>), 4.02 (d,  $J = 9.2$ , 2H, NCH<sub>2</sub>), 3.05 (d,  $J = 4.4$  Hz, 1H, OCH<sub>2</sub>), 3.02 (d,  $J = 4.5$  Hz, 1H, OCH<sub>2</sub>), 1.44 (s, 9H, 3 x CH<sub>3</sub>). <sup>13</sup>C NMR (126 MHz, CDCl<sub>3</sub>)  $\delta$  156.1 (C=O), 135.0 (Ar-C<sub>q</sub>), 128.8 (Ar-C), 128.4 (2 x Ar-C), 127.9 (2 x Ar-C), 80.5 (OC(CH<sub>3</sub>)<sub>3</sub>), 63.4, 61.1, 60.6, 52.8 (OCH<sub>2</sub>), 28.5 (3 x CH<sub>3</sub>). HRMS  $m/z$  calculated for C<sub>16</sub>H<sub>20</sub>ClNNaO<sub>3</sub> [M+Na]<sup>+</sup> 332.1024; found 332.1030.

### **tert-butyl 3-bromo-3-(2-phenyloxiran-2-yl)azetidine-1-carboxylate **8b****

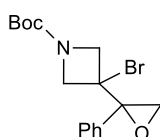

Following the GP3 with **5a**, LiBr (0.25 mmol) and Boc<sub>2</sub>O, **8b** was obtained as a pale yellow oil (78 mg, 88 %) after column chromatography ( $R_f = 0.5$ , hexane/EtOAc 7:3). FT-IR  $\nu_{\max}/\text{cm}^{-1}$  2979, 1809, 1718, 1455, 1407, 1372, 1263, 1118, 1101, 872, 845, 728. <sup>1</sup>H NMR (500 MHz, CDCl<sub>3</sub>)  $\delta$  7.54 – 7.51 (m, 2H, Ar-H), 7.40 – 7.32 (m, 3H, Ar-H), 4.49 (d,  $J = 10.2$  Hz, 2H, NCH<sub>2</sub>), 4.21 – 4.15 (m, 2H, NCH<sub>2</sub>), 3.11 – 3.03 (m, 2H, OCH<sub>2</sub>), 1.45 (s, 9H, 3 x CH<sub>3</sub>). <sup>13</sup>C NMR (126 MHz, CDCl<sub>3</sub>)  $\delta$  156.2 (C=O), 146.9 (Ar-C<sub>q</sub>), 128.8 (2 x Ar-C), 128.4 (2 x Ar-C), 128.1 (Ar-C), 85.3 (OC<sub>q</sub>), 80.5 (OC(CH<sub>3</sub>)<sub>3</sub>), 61.5 (2 x NCH<sub>2</sub>), 54.8 (CBr), 53.7 (OCH<sub>2</sub>), 28.5 (3 x CH<sub>3</sub>). HRMS  $m/z$  calculated for C<sub>16</sub>H<sub>20</sub>BrNNaO<sub>3</sub> [M+Na]<sup>+</sup> 376.0524; found 376.0518.

### **tert-butyl 3-iodo-3-(2-phenyloxiran-2-yl)azetidine-1-carboxylate **8c****

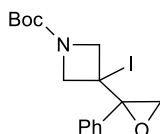

Following the GP3 with **5a**, LiI (0.25 mmol) and Boc<sub>2</sub>O, **8c** was obtained as a pale yellow oil (75 mg, 75 %) after column chromatography ( $R_f = 0.4$ , hexane/EtOAc 8:2). FT-IR  $\nu_{\max}/\text{cm}^{-1}$  2976, 2931, 1713, 1448, 1392, 1280, 1256, 1163, 1063, 859, 756, 699. <sup>1</sup>H NMR (500 MHz, CDCl<sub>3</sub>)  $\delta$  7.54 – 7.49 (m, 2H, Ar-H), 7.40 – 7.33 (m, 3H, Ar-H), 4.66 (d,  $J = 9.6$  Hz, 1H, NCH<sub>2</sub>), 4.64 (d,  $J = 10.8$  Hz, 1H, NCH<sub>2</sub>), 4.32 (dd,  $J = 9.5, 1.1$  Hz, 1H, NCH<sub>2</sub>), 4.27 (d,  $J = 10.4$  Hz, 1H, NCH<sub>2</sub>), 3.13 (d,  $J = 4.5$  Hz, 1H, OCH<sub>2</sub>), 3.04 (d,  $J = 4.3$  Hz, 1H, OCH<sub>2</sub>), 1.45 (s, 9H, 3 x CH<sub>3</sub>). <sup>13</sup>C NMR (126 MHz, CDCl<sub>3</sub>)  $\delta$  156.3 (C=O), 136.2 (Ar-C<sub>q</sub>), 128.8 (2 x Ar-C), 128.5 (Ar-C), 128.3 (2 x Ar-C), 80.5 (OC(CH<sub>3</sub>)<sub>3</sub>), 63.7 (bs, NCH<sub>2</sub>), 62.9 (Oxiranyl-C<sub>q</sub>), 54.8 (OCH<sub>2</sub>), 31.0 (C<sub>q</sub>), 28.5 (3 x CH<sub>3</sub>). HRMS  $m/z$  calculated for C<sub>16</sub>H<sub>20</sub>I NNaO<sub>3</sub><sup>+</sup> [M+Na]<sup>+</sup> 424.0386; found 424.0380.

### **tert-butyl 3-(2-phenyloxiran-2-yl)-3-(phenylthio)azetidine-1-carboxylate **8d****

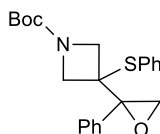

Following the GP4 with **5a** and thiophenol, **8d** was obtained as a pale yellow oil (81 mg, 85 %) after column chromatography ( $R_f = 0.4$ , hexane/EtOAc 7:3). FT-IR  $\nu_{\max}/\text{cm}^{-1}$  2976, 1703, 1474, 1392, 1367, 1256, 1140, 1025, 915, 859, 752, 697. <sup>1</sup>H NMR (500 MHz, CDCl<sub>3</sub>)  $\delta$  7.58 (d,  $J = 6.6$  Hz, 2H, Ar-H), 7.52 – 7.48 (m, 2H, Ar-H),

7.39 – 7.31 (m, 6H, Ar-H), 4.19 (d,  $J = 9.5$  Hz, 1H, NCH<sub>2</sub>), 4.09 (d,  $J = 8.5$  Hz, 1H, NCH<sub>2</sub>), 3.95 (d,  $J = 8.6$  Hz, 1H, NCH<sub>2</sub>) 3.82 (d,  $J = 9.5$  Hz, 1H, NCH<sub>2</sub>), 2.86 (d,  $J = 4.5$  Hz, 1H, OCH<sub>2</sub>), 2.66 (d,  $J = 4.4$  Hz, 1H, OCH<sub>2</sub>), 1.40 (s, 9H, CH<sub>3</sub>). <sup>13</sup>C NMR (126 MHz, CDCl<sub>3</sub>)  $\delta$  156.2 (C=O), 136.6 (Ar-C<sub>q</sub>), 135.7 (2 x Ar-C), 130.9 (Ar-C<sub>q</sub>), 129.4 (Ar-C), 129.2 (2 x Ar-C), 128.4 (Ar-C), 128.3 (2 x Ar-C), 128.0 (2 x Ar-C), 80.0 (OC(CH<sub>3</sub>)<sub>3</sub>), 74.2 (OC<sub>q</sub>Ph), 57.7 (NCH<sub>2</sub>), 56.6 (NCH<sub>2</sub>), 52.5 (OCH<sub>2</sub>), 49.9 (SC<sub>q</sub>), 28.5 (3 x CH<sub>3</sub>). HRMS  $m/z$  calculated for C<sub>22</sub>H<sub>25</sub>NNaO<sub>3</sub>S [M+Na]<sup>+</sup> 406.1453; found 406.1442.

**tert-butyl 3-(naphthalen-2-ylthio)-3-((2S\*,3R\*)-3-octyl-2-phenyloxiran-2-yl)azetidide-1-carboxylate 8e**

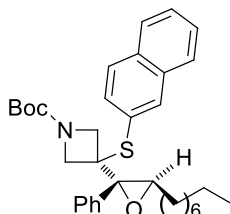

Following the GP4 with **5i** and naphthalene-2-thiol, **8e** was obtained as a waxy yellow solid (99 mg, 73 %) after column chromatography ( $R_f = 0.4$ , hexane/EtOAc 7:3). FT-IR  $\nu_{\max}/\text{cm}^{-1}$  3056, 2925, 1704, 1698, 1455, 1393, 1255, 1150, 1078, 943, 915, 859, 816, 746. <sup>1</sup>H NMR (500 MHz, CDCl<sub>3</sub>)  $\delta$  8.03 (d,  $J = 1.8$  Hz, 1H, Ar-H), 7.82 (td,  $J = 9.1, 8.5, 4.1$  Hz, 3H, Ar-H), 7.66 – 7.61 (m, 2H, Ar-H), 7.57 (dd,  $J = 8.5, 1.8$  Hz, 1H, Ar-H), 7.55 – 7.50 (m, 2H, Ar-H), 7.42 – 7.34 (m, 3H, Ar-H), 4.18 (d,  $J = 9.1$  Hz, 1H, NCH<sub>2</sub>), 4.14 (bs, 1H, NCH<sub>2</sub>), 4.04 (bs, 1H, NCH<sub>2</sub>), 3.68 (d,  $J = 9.1$  Hz, 1H, NCH<sub>2</sub>), 2.88 – 2.82 (m, 1H, OCH), 1.34 (s, 9H, 3 x CH<sub>3</sub>), 1.29 – 1.00 (m, 14H, (CH<sub>2</sub>)<sub>7</sub>), 0.87 (t,  $J = 7.2$  Hz, 3H, (CH<sub>2</sub>)<sub>7</sub>CH<sub>3</sub>). <sup>13</sup>C NMR (126 MHz, CDCl<sub>3</sub>)  $\delta$  156.2 (C=O), 134.6 (Ar-C), 133.6 (Ar-C<sub>q</sub>), 133.2 (Ar-C<sub>q</sub>), 131.4 (Ar-C), 129.0 (2 x Ar-C), 128.8 (2 x Ar-C), 128.2 (Ar-C<sub>q</sub>), 128.0 (3 x Ar-C), 127.9 (Ar-C<sub>q</sub>), 127.8 (Ar-C), 127.1 (Ar-C), 126.9 (Ar-C), 79.8 (OC(CH<sub>3</sub>)<sub>3</sub>), 65.5 (OC<sub>q</sub>Ph), 61.7 (OCH), 57.3 (bs, 2 x NCH<sub>2</sub>), 51.2 (SC<sub>q</sub>), 31.9 ((CH<sub>2</sub>)<sub>7</sub>), 29.4 ((CH<sub>2</sub>)<sub>7</sub>), 29.3 ((CH<sub>2</sub>)<sub>7</sub>), 29.2 ((CH<sub>2</sub>)<sub>7</sub>), 29.1 ((CH<sub>2</sub>)<sub>7</sub>), 28.4 (3 x CH<sub>3</sub>), 26.1 ((CH<sub>2</sub>)<sub>7</sub>), 22.7 ((CH<sub>2</sub>)<sub>7</sub>), 14.2 (CH<sub>2</sub>CH<sub>3</sub>). HRMS  $m/z$  calculated for C<sub>34</sub>H<sub>43</sub>NNaO<sub>3</sub>S [M+Na]<sup>+</sup> 568.2861; found 568.2864.

**tert-butyl 3-chloro-3-(2-phenyloxetan-2-yl)azetidide-1-carboxylate 9a**

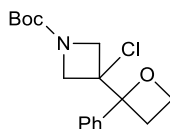

Following the GP3 with **6a**, LiCl and Boc<sub>2</sub>O, **9a** was obtained as a pale yellow oil (74 mg, 92 %) after column chromatography ( $R_f = 0.4$ , hexane/EtOAc 7:3). FT-IR  $\nu_{\max}/\text{cm}^{-1}$  2974, 2890, 1706, 1448, 1392, 1366, 1275, 1159, 997, 965, 859, 753, 704. <sup>1</sup>H NMR (500 MHz, CDCl<sub>3</sub>)  $\delta$  7.49 – 7.44 (m, 2H, Ar-H), 7.40 – 7.35 (m, 2H, Ar-H), 7.35 – 7.30 (m, 1H, Ar-H), 4.86 (d,  $J = 9.1$  Hz, 1H, NCH<sub>2</sub>), 4.60 – 4.51 (m, 2H, OCH<sub>2</sub>), 4.41 (d,  $J = 10.1$  Hz, 1H, NCH<sub>2</sub>), 4.22 (dd,  $J = 9.3, 1.0$  Hz, 1H, NCH<sub>2</sub>), 3.75 (d,  $J = 10.0$  Hz, 1H, NCH<sub>2</sub>), 2.99 (dd,  $J = 9.8, 1.9$  Hz, 1H, OCH<sub>2</sub>CH<sub>2</sub>), 2.86 (dd,  $J = 8.7, 6.0$  Hz, 1H, OCH<sub>2</sub>CH<sub>2</sub>), 1.46 (s, 9H, 3 x CH<sub>3</sub>). <sup>13</sup>C NMR (126 MHz, CDCl<sub>3</sub>)  $\delta$  156.3 (C=O), 141.0 (Ar-C<sub>q</sub>), 128.0 (Ar-C), 127.8 (2 x Ar-C), 126.6 (2 x Ar-C), 87.1 (oxetanyl-OC<sub>q</sub>), 80.3 (OC(CH<sub>3</sub>)<sub>3</sub>), 66.2 (CCl) 65.3 (OCH<sub>2</sub>), 60.5 (bs, NCH<sub>2</sub>), 59.2 (bs, NCH<sub>2</sub>) 30.6 (OCH<sub>2</sub>CH<sub>2</sub>), 28.5 (3 x CH<sub>3</sub>). HRMS  $m/z$  calculated for C<sub>17</sub>H<sub>22</sub>ClNNaO<sub>3</sub> [M+Na]<sup>+</sup> 346.1180; found 346.1185.

**tert-butyl 3-bromo-3-(2-phenyloxetan-2-yl)azetidide-1-carboxylate 9b**

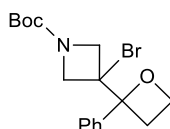

Following the GP3 with **6a**, LiBr and Boc<sub>2</sub>O, **9b** was obtained as a pale yellow oil (78 mg, 85 %) after column chromatography ( $R_f = 0.5$ , hexane/EtOAc 7:3). FT-IR  $\nu_{\max}/\text{cm}^{-1}$  2975, 2888, 1706, 1448, 1390, 1366, 1274, 1161, 962, 859, 751, 702. <sup>1</sup>H NMR (500 MHz, CDCl<sub>3</sub>)  $\delta$  7.50 – 7.47 (m, 2H, Ar-H), 7.40 – 7.36 (m, 2H, Ar-H), 7.35 – 7.32 (m, 1H, Ar-H), 4.98 (d,  $J = 9.3$  Hz, 1H, NCH<sub>2</sub>), 4.59 (d,  $J = 10.3$  Hz, 1H, NCH<sub>2</sub>), 4.56 – 4.48 (m, 2H, OCH<sub>2</sub>), 4.37 (dt,  $J = 23.2, 11.6$  Hz, 1H, NCH<sub>2</sub>), 3.92 (d,  $J = 10.3$  Hz, 1H, NCH<sub>2</sub>), 3.02 - 2.96 (m, 1H, OCH<sub>2</sub>CH<sub>2</sub>), 2.91 - 2.86 (m, 1H, OCH<sub>2</sub>CH<sub>2</sub>), 1.46 (s, 9H, 3 x CH<sub>3</sub>). <sup>13</sup>C NMR (126 MHz, CDCl<sub>3</sub>)  $\delta$  156.4 (C=O), 141.3 (Ar-C<sub>q</sub>), 128.0 (Ar-C), 127.7 (2 x Ar-C), 126.8 (2 x Ar-C), 87.4 (oxetanyl-OC<sub>q</sub>), 80.4 (OC(CH<sub>3</sub>)<sub>3</sub>), 64.7 (OCH<sub>2</sub>), 61.7 (bs, NCH<sub>2</sub>), 59.9 (CBr), 59.4 (bs, NCH<sub>2</sub>), 31.2 (OCH<sub>2</sub>CH<sub>2</sub>), 28.5 (3 x CH<sub>3</sub>). HRMS  $m/z$  calculated for C<sub>17</sub>H<sub>22</sub>BrNNaO [M+Na]<sup>+</sup> 390.0675; found 390.0667.

### **tert-butyl 3-iodo-3-(2-phenyloxetan-2-yl)azetidide-1-carboxylate 9c**

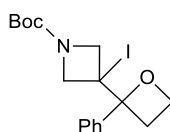

Following the GP3 with **6a**, LiI and Boc<sub>2</sub>O, **9c** was obtained as a pale yellow oil (74 mg, 71 %) after column chromatography ( $R_f = 0.5$ , hexane/EtOAc 8:2). FT-IR  $\nu_{\max}/\text{cm}^{-1}$  3422, 2975, 2887, 1704, 1968 1448, 1392, 1271, 1161, 959, 859, 749, 702, 607. <sup>1</sup>H NMR (500 MHz, CDCl<sub>3</sub>)  $\delta$  7.51 - 7.47 (m, 2H, Ar-H), 7.39 – 7.36 (m, 2H, Ar-H), 7.34 – 7.30 (m, 1H, Ar-H), 5.09 (d,  $J = 9.3$  Hz, 1H, NCH<sub>2</sub>), 4.80 (d,  $J = 10.3$  Hz, 1H, NCH<sub>2</sub>), 4.50 (dd,  $J = 9.5, 1.1$  Hz, 1H, NCH<sub>2</sub>), 4.48 – 4.44 (m, 1H, OCH<sub>2</sub>), 4.43 – 4.36 (m, 1H, OCH<sub>2</sub>), 4.07 (dd,  $J = 10.3$  Hz, 1H, NCH<sub>2</sub>), 3.01 – 2.93 (m, 1H, OCH<sub>2</sub>CH<sub>2</sub>), 2.93 – 2.86 (m, 1H, OCH<sub>2</sub>CH<sub>2</sub>), 1.46 (s, 9H, 3 x CH<sub>3</sub>). <sup>13</sup>C NMR (126 MHz, CDCl<sub>3</sub>)  $\delta$  156.4 (C=O), 142.3 (Ar-C<sub>q</sub>), 128.0 (Ar-C), 127.7 (2 x Ar-C), 127.0 (2 x Ar-C), 88.7 (oxetanyl-OC<sub>q</sub>), 80.4 (OC(CH<sub>3</sub>)<sub>3</sub>), 64.5 (bs, NCH<sub>2</sub>), 63.8 (OCH<sub>2</sub>), 62.1 (bs, NCH<sub>2</sub>), 40.5 (C<sub>q</sub>), 31.9 (OCH<sub>2</sub>CH<sub>2</sub>), 28.5 (3 x CH<sub>3</sub>). HRMS  $m/z$  calculated for C<sub>17</sub>H<sub>22</sub>IINaO<sub>3</sub> [M+Na]<sup>+</sup> 438.0537; found 438.0537.

### **3-(2-(4-fluorophenyl)oxetan-2-yl)-3-iodo-1-tosylazetidide 9d**

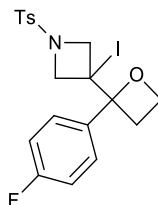

Following the GP3 with **6e**, LiI and tosyl chloride, **9d** was obtained as a pale yellow oil (110 mg, 90 %) after column chromatography ( $R_f = 0.4$ , hexane/EtOAc 8:2). FT-IR  $\nu_{\max}/\text{cm}^{-1}$  2917, 1735, 1599, 1508, 1347, 1223, 1159, 1094, 958, 816, 676. <sup>1</sup>H NMR (500 MHz, CDCl<sub>3</sub>)  $\delta$  7.77 (d,  $J = 8.3$  Hz, 2H, Ar-H), 7.39 (d,  $J = 8.0$  Hz, 2H, Ar-H), 7.34 – 7.29 (m, 2H, Ar-H), 7.04 – 6.97 (m, 2H, Ar-H), 4.88 (d,  $J = 9.1$  Hz, 1H, NCH<sub>2</sub>), 4.59 (d,  $J = 9.8$  Hz, 1H, NCH<sub>2</sub>), 4.29 – 4.21 (m, 3H, 1H NCH<sub>2</sub> and 2H OCH<sub>2</sub>), 3.86 (d,  $J = 9.8$  Hz, 1H, NCH<sub>2</sub>), 2.88 (dt,  $J = 11.8, 8.5$  Hz, 1H, OCH<sub>2</sub>CH<sub>2</sub>), 2.78 – 2.71 (m, 1H, OCH<sub>2</sub>CH<sub>2</sub>), 2.46 (s, 3H, CH<sub>3</sub>). <sup>13</sup>C NMR (126 MHz, CDCl<sub>3</sub>)  $\delta$  162.4 (d, <sup>1</sup>J<sub>C-F</sub> = 247.6 Hz, Ar-C<sub>q</sub>), 144.7 (Ar-C<sub>q</sub>), 137.8 (d, <sup>4</sup>J<sub>C-F</sub> = 3.2 Hz, Ar-C<sub>q</sub>), 131.7 (Ar-C<sub>q</sub>), 129.9 (2 x Ar-C), 128.6 (d, <sup>3</sup>J<sub>C-F</sub> = 8.2 Hz, 2 x Ar-C), 128.5 (2 x Ar-C), 114.7 (d, <sup>2</sup>J<sub>C-F</sub> = 21.6 Hz, 2 x Ar-C), 87.9 (OC<sub>q</sub>), 64.1 (NCH<sub>2</sub>), 63.5 (OCH<sub>2</sub>), 62.1 (NCH<sub>2</sub>), 38.5 (C<sub>q</sub>), 31.5 (OCH<sub>2</sub>CH<sub>2</sub>), 21.8 (CH<sub>3</sub>). <sup>19</sup>F NMR (282 MHz, CDCl<sub>3</sub>) -113.93 – -114.03 (m, 1F). HRMS  $m/z$  calculated for C<sub>19</sub>H<sub>19</sub>FINNaO<sub>3</sub>S [M+Na]<sup>+</sup> 510.0012; found 510.0014.

### **tert-butyl 3-(2-phenyloxetan-2-yl)-3-(phenylthio)azetidide-1-carboxylate 9e**

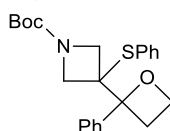

Following the GP4 with **6a** and thiophenol, **9e** was obtained as a pale yellow oil (77 mg, 78 %) after column chromatography ( $R_f = 0.4$ , hexane/EtOAc 7:3). FT-IR  $\nu_{\max}/\text{cm}^{-1}$  3435, 2529, 2080, 1645, 1447, 1393, 1366, 1257, 1145, 963, 750, 666.  $^1\text{H}$  NMR (500 MHz,  $\text{CDCl}_3$ )  $\delta$  7.52 – 7.50 (m, 2H, Ar-H), 7.42 – 7.38 (m, 4H, 4 x Ar-H), 7.36 – 7.31 (m, 2H, Ar-H), 7.31 – 7.27 (m, 2H, Ar-H), 4.62 – 4.46 (m, 3H, 2H  $\text{OCH}_2$  and 1H  $\text{NCH}_2$ ), 4.40 (d,  $J = 9.7$  Hz, 1H,  $\text{NCH}_2$ ), 4.04 – 3.92 (m, 1H,  $\text{NCH}_2$ ), 3.77 – 3.63 (m, 1H,  $\text{NCH}_2$ ), 3.07 (bs, 1H,  $\text{OCH}_2\text{CH}_2$ ), 2.86 – 2.81 (m, 1H,  $\text{OCH}_2\text{CH}_2$ ), 1.34 (s, 9H, 3 x  $\text{CH}_3$ ).  $^{13}\text{C}$  NMR (126 MHz,  $\text{CDCl}_3$ )  $\delta$  156.1 (C=O), 142.5 (Ar- $\text{C}_q$ ), 136.3 (2 x Ar-C), 131.1 (Ar- $\text{C}_q$ ), 129.2 (Ar-C), 129.1 (2 x Ar-C), 127.9 (2 x Ar-C), 127.8 (Ar-C), 126.3 (2 x Ar-C), 88.4 (oxetanyl- $\text{OC}_q$ ), 79.7 ( $\text{OC}(\text{CH}_3)_3$ ), 65.4 ( $\text{OCH}_2$ ), 56.1 (bs,  $\text{NCH}_2$ ), 54.2 ( $\text{C}_q\text{SPh}$ ), 31.4 ( $\text{OCH}_2\text{CH}_2$ ), 28.5 (3 x  $\text{CH}_3$ ). HRMS  $m/z$  calculated for  $\text{C}_{23}\text{H}_{27}\text{NO}_3\text{S}$   $[\text{M}+\text{Na}]^+$  420.1604; found 420.1611.

**tert-butyl 3-(2-(4-fluorophenyl)oxetan-2-yl)-3-((4-nitrophenyl)thio)azetidine-1-carboxylate 9f**

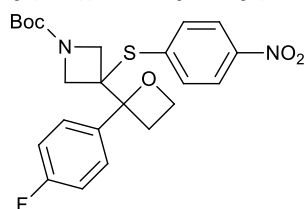

Following the GP4 with **6e** and 4-nitrobenzenethiol, **9f** was obtained as a waxy yellow solid (75 mg, 65 %) after column chromatography ( $R_f = 0.4$ , hexane/EtOAc 7:3). FT-IR  $\nu_{\max}/\text{cm}^{-1}$  2976, 2250, 1699, 1597, 1578, 1513, 1393, 1342, 1157, 964, 853, 731.  $^1\text{H}$  NMR (500 MHz,  $\text{CDCl}_3$ )  $\delta$  8.08 – 8.01 (m, 2H, Ar-H), 7.43 – 7.36 (m, 2H, Ar-H), 7.31 – 7.24 (m, 2H, Ar-H), 7.04 (t,  $J = 8.6$  Hz, 2H, Ar-H), 4.64 – 4.47 (m, 4H, 2H  $\text{NCH}_2$  and 2H  $\text{OCH}_2$ ), 3.97 (d,  $J = 9.1$  Hz, 1H,  $\text{NCH}_2$ ), 3.87 (bs, 1H,  $\text{NCH}_2$ ), 3.22 – 3.12 (m, 1H,  $\text{OCH}_2\text{CH}_2$ ), 2.84 (ddd,  $J = 11.5, 8.4, 5.6$  Hz, 1H,  $\text{OCH}_2\text{CH}_2$ ), 1.40 (s, 9H, 3 x  $\text{CH}_3$ ).  $^{13}\text{C}$  NMR (126 MHz,  $\text{CDCl}_3$ )  $\delta$  162.5 (d,  $^1J_{\text{C-F}} = 247.6$  Hz, C-F), 155.9 (C=O), 146.8 (Ar- $\text{C}_q$ ), 142.3 (Ar- $\text{C}_q$ ), 138.3 (d,  $^4J_{\text{C-F}} = 3.3$  Hz, Ar- $\text{C}_q$ ), 131.7 (2 x Ar-C), 127.8 (d,  $^3J_{\text{C-F}} = 8.1$  Hz, 2 x Ar-C), 123.8 (2 x Ar-C), 115.2 (d,  $^2J_{\text{C-F}} = 21.5$  Hz, 2 x Ar-C), 88.5 (oxetanyl- $\text{OC}_q$ ), 80.6 ( $\text{OC}(\text{CH}_3)_3$ ), 65.3 ( $\text{OCH}_2$ ), 57.0 (bs,  $\text{NCH}_2$ ), 55.6 (bs,  $\text{NCH}_2$ ), 54.1 ( $\text{C}_q\text{SAr}$ ), 31.5 ( $\text{OCH}_2\text{CH}_2$ ), 28.5 (3 x  $\text{CH}_3$ ).  $^{19}\text{F}$  NMR (282 MHz,  $\text{CDCl}_3$ )  $\delta$  -113.82 – -113.99 (m, 1F). HRMS  $m/z$  calculated for  $\text{C}_{23}\text{H}_{25}\text{FN}_2\text{NaO}_5\text{S}$   $[\text{M}+\text{Na}]^+$  483.1366; found 483.1363.

**tert-butyl 3-chloro-3-(2-phenyltetrahydrofuran-2-yl)azetidine-1-carboxylate 10a**

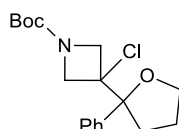

Following the GP3 with **7a**,  $\text{ZnCl}_2$  and  $\text{Boc}_2\text{O}$ , **10a** was obtained as a pale yellow oil (80 mg, 95 %) after column chromatography ( $R_f = 0.4$ , hexane/EtOAc 8:2). FT-IR  $\nu_{\max}/\text{cm}^{-1}$  2980, 1703, 1447, 1416, 1365, 1255, 1161, 1139, 1056, 859, 754, 707.  $^1\text{H}$  NMR (500 MHz,  $\text{CDCl}_3$ )  $\delta$  7.60 – 7.55 (m, 2H, Ar-H), 7.36 – 7.28 (m, 3H, Ar-H), 4.49 (d,  $J = 9.1$  Hz, 1H,  $\text{NCH}_2$ ), 4.42 (d,  $J = 9.8$  Hz, 1H,  $\text{NCH}_2$ ), 4.10 – 4.02 (m, 2H, 1H  $\text{NCH}_2$  and 1H  $\text{OCH}_2$ ), 3.94 (td,  $J = 8.3, 4.7$  Hz, 1H,  $\text{OCH}_2$ ), 3.67 (d,  $J = 9.8$  Hz, 1H,  $\text{NCH}_2$ ), 2.53 (ddd,  $J = 12.4, 7.7, 3.0$  Hz, 1H,  $\text{OCH}_2\text{CH}_2\text{CH}_2$ ), 2.12 – 2.04 (m, 1H,  $\text{OCH}_2\text{CH}_2\text{CH}_2$ ), 2.03 – 1.92 (m, 1H,  $\text{OCH}_2\text{CH}_2\text{CH}_2$ ), 1.80 – 1.69 (m, Hz, 1H,  $\text{OCH}_2\text{CH}_2\text{CH}_2$ ), 1.45 (s, 9H, 3 x  $\text{CH}_3$ ).  $^{13}\text{C}$  NMR (126 MHz,  $\text{CDCl}_3$ )  $\delta$  156.4 (C=O), 140.2 (Ar- $\text{C}_q$ ), 127.9 (2 x Ar-C), 127.8 (Ar-C), 127.6 (2 x Ar-C), 87.6 (tetrahydrofuran- $\text{OC}_q$ ), 80.0 ( $\text{OC}(\text{CH}_3)_3$ ), 69.1 ( $\text{OCH}_2$ ), 67.4 (CCl), 61.0 (bs,  $\text{NCH}_2$ ), 34.4 ( $\text{OCH}_2\text{CH}_2\text{CH}_2$ ), 28.5 (3 x  $\text{CH}_3$ ), 25.7 ( $\text{OCH}_2\text{CH}_2\text{CH}_2$ ). HRMS  $m/z$  calculated for  $\text{C}_{19}\text{H}_{26}\text{BrNNaO}_3$   $[\text{M}+\text{Na}]^+$  360.1342; found 360.1331.

**tert-butyl 3-bromo-3-(2-phenyltetrahydrofuran-2-yl)azetidine-1-carboxylate 10b**

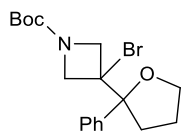

Following the GP3 with **7a**, LiBr and Boc<sub>2</sub>O, **10b** was obtained as a pale yellow oil (81 mg, 85 %) after column chromatography ( $R_f = 0.4$ , hexane/EtOAc 8:2). FT-IR  $\nu_{\max}/\text{cm}^{-1}$  2965, 1720, 1578, 1455, 1408, 1455, 1263, 1117, 1100, 1017, 874, 727. <sup>1</sup>H NMR (500 MHz, CDCl<sub>3</sub>)  $\delta$  7.59 (d,  $J = 7.3$  Hz, 2H, Ar-H), 7.38 – 7.28 (m, 3H, Ar-H), 4.61 (dd,  $J = 20.7, 9.7$  Hz, 2H, NCH<sub>2</sub>), 4.25 (d,  $J = 9.4$ , 1H, NCH<sub>2</sub>), 4.08 (q,  $J = 7.8$  Hz, 1H, OCH<sub>2</sub>CH<sub>2</sub>CH<sub>2</sub>), 3.96 (td,  $J = 8.3, 4.6$  Hz, 1H, OCH<sub>2</sub>CH<sub>2</sub>CH<sub>2</sub>), 3.87 (d,  $J = 10.1$  Hz, 1H, NCH<sub>2</sub>), 2.62 – 2.55 (m, 1H, OCH<sub>2</sub>CH<sub>2</sub>CH<sub>2</sub>), 2.15 – 2.05 (m, 1H, OCH<sub>2</sub>CH<sub>2</sub>CH<sub>2</sub>), 2.03 – 1.94 (m, 1H, OCH<sub>2</sub>CH<sub>2</sub>CH<sub>2</sub>), 1.79 – 1.70 (m, 1H, OCH<sub>2</sub>CH<sub>2</sub>CH<sub>2</sub>), 1.45 (s, 3 x CH<sub>3</sub>). <sup>13</sup>C NMR (126 MHz, CDCl<sub>3</sub>)  $\delta$  156.5 (C=O) 140.5 (Ar-C<sub>q</sub>), 127.9 (Ar-C), 127.8 (2 x Ar-C), 127.7 (2 x Ar-C), 87.8 (OC<sub>q</sub>Ph), 80.1 (OC(CH<sub>3</sub>)<sub>3</sub>), 69.2 (OCH<sub>2</sub>CH<sub>2</sub>CH<sub>2</sub>), 62.0 (bs, 2 x NCH<sub>2</sub>), 60.9 (CBr), 35.0 (OCH<sub>2</sub>CH<sub>2</sub>CH<sub>2</sub>), 28.5 (3 x CH<sub>3</sub>), 25.7 (OCH<sub>2</sub>CH<sub>2</sub>CH<sub>2</sub>). HRMS  $m/z$  calculated for C<sub>18</sub>H<sub>24</sub>BrNNaO<sub>3</sub> [M+Na]<sup>+</sup> 404.0832; found 404.0833.

#### tert-butyl 3-iodo-3-(2-phenyltetrahydrofuran-2-yl)azetidine-1-carboxylate **10c**

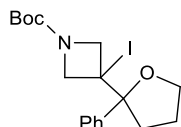

Following the GP3 with **7a**, LiI and Boc<sub>2</sub>O, **10c** was obtained as a pale yellow oil (84 mg, 78 %) after column chromatography ( $R_f = 0.4$ , hexane/EtOAc 7:3). FT-IR  $\nu_{\max}/\text{cm}^{-1}$  2974, 1718, 447, 1407, 1263, 1119, 1100, 1047, 1018, 913, 727, 702. <sup>1</sup>H NMR (500 MHz, CDCl<sub>3</sub>)  $\delta$  7.57 (d,  $J = 7.3$  Hz, 2H, Ar-H), 7.38 – 7.28 (m, 3H Ar-H), 4.81 – 4.75 (m, 2H, NCH<sub>2</sub>), 4.41 (d,  $J = 9.6$  Hz, 1H, NCH<sub>2</sub>), 4.13 – 4.04 (m, 2H, 1H NCH<sub>2</sub> and 1H OCH<sub>2</sub>), 3.97 (td,  $J = 8.3, 4.6$  Hz, 1H, OCH<sub>2</sub>), 2.62 (ddd,  $J = 12.3, 7.7, 2.8$  Hz, 1H, OCH<sub>2</sub>CH<sub>2</sub>), 2.18 – 2.09 (m, 1H, OCH<sub>2</sub>CH<sub>2</sub>), 2.06 – 1.96 (m, 1H, OCH<sub>2</sub>CH<sub>2</sub>CH<sub>2</sub>), 1.84 – 1.72 (m, 1H, OCH<sub>2</sub>CH<sub>2</sub>CH<sub>2</sub>), 1.45 (s, 9H, CH<sub>3</sub>). <sup>13</sup>C NMR (126 MHz, CDCl<sub>3</sub>)  $\delta$  156.5 (C=O), 141.6 (Ar-C<sub>q</sub>), 127.9 (3 x Ar-C), 127.7 (2 x Ar-C), 88.4 (tetrahydrofuran-yl-OC<sub>q</sub>), 80.1 (OC(CH<sub>3</sub>)<sub>3</sub>), 69.3 (OCH<sub>2</sub>), 64.6 (bs, 2 x NCH<sub>2</sub>), 40.9 (IC), 35.5 (OCH<sub>2</sub>CH<sub>2</sub>), 28.5 (3 x CH<sub>3</sub>), 25.8 (OCH<sub>2</sub>CH<sub>2</sub>CH<sub>2</sub>). HRMS  $m/z$  calculated for C<sub>18</sub>H<sub>24</sub>I NNaO<sub>3</sub> [M+Na]<sup>+</sup> 452.0693; found 452.0692.

#### tert-butyl 3-bromo-3-(2-(p-tolyl)tetrahydrofuran-2-yl)azetidine-1-carboxylate **10d**

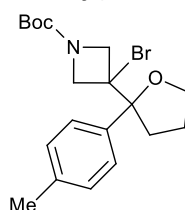

Following the GP3 with **7c**, LiBr and Boc<sub>2</sub>O, **10d** was obtained as a pale yellow oil (91 mg, 92 %) after column chromatography ( $R_f = 0.4$ , hexane/EtOAc 7:3). FT-IR  $\nu_{\max}/\text{cm}^{-1}$  3419, 1702, 1409, 1365, 1225, 1156, 1050, 975, 938, 860, 805, 767. <sup>1</sup>H NMR (500 MHz, CDCl<sub>3</sub>)  $\delta$  7.47 (d,  $J = 8.2$  Hz, 2H, Ar-H), 7.15 (d,  $J = 8.2$  Hz, 2H, Ar-H), 4.60 (dd,  $J = 15.2, 9.8$  Hz, 2H, NCH<sub>2</sub>), 4.24 (dd,  $J = 9.4, 1.2$  Hz, 1H, NCH<sub>2</sub>), 4.06 (dd,  $J = 15.5, 7.8$  Hz, 1H, OCH<sub>2</sub>CH<sub>2</sub>CH<sub>2</sub>), 3.94 (td,  $J = 8.3, 4.6$  Hz, 1H, OCH<sub>2</sub>CH<sub>2</sub>CH<sub>2</sub>), 3.87 (d,  $J = 10.1$  Hz, 1H, NCH<sub>2</sub>), 2.56 (ddd,  $J = 12.5, 7.7, 2.9$  Hz, 1H, OCH<sub>2</sub>CH<sub>2</sub>CH<sub>2</sub>), 2.34 (s, 3H, Ar-CH<sub>3</sub>), 2.11 – 2.02 (m, 1H, OCH<sub>2</sub>CH<sub>2</sub>CH<sub>2</sub>), 2.01 – 1.93 (m, 1H, OCH<sub>2</sub>CH<sub>2</sub>CH<sub>2</sub>), 1.80 – 1.70 (m, 1H, OCH<sub>2</sub>CH<sub>2</sub>CH<sub>2</sub>), 1.44 (s, 9H, 3 x CH<sub>3</sub>). <sup>13</sup>C NMR (126 MHz, CDCl<sub>3</sub>)  $\delta$  156.5 (C=O), 137.6 (Ar-C<sub>q</sub>), 137.5 (Ar-C<sub>q</sub>), 128.6 (2 x Ar-C), 127.6 (2 x Ar-C), 87.7 (OC<sub>q</sub>Ar), 80.0 (OC(CH<sub>3</sub>)<sub>3</sub>), 69.2 (OCH<sub>2</sub>CH<sub>2</sub>CH<sub>2</sub>), 61.9 (bs, 2 x NCH<sub>2</sub>), 61.1 (CBr), 35.0 (OCH<sub>2</sub>CH<sub>2</sub>CH<sub>2</sub>), 28.5 (3 x CH<sub>3</sub>), 25.7 (OCH<sub>2</sub>CH<sub>2</sub>CH<sub>2</sub>), 21.2 (Ar-CH<sub>3</sub>). HRMS  $m/z$  calculated for C<sub>19</sub>H<sub>26</sub>BrNNaO<sub>3</sub> [M+Na]<sup>+</sup> 418.0994; found 418.1007.

#### tert-butyl-3-(2-phenyltetrahydrofuran-2-yl)-3-(phenylthio)azetidine-1-carboxylate **10e**



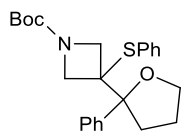

Following the GP4 with **7a** and thiophenol, **10e** was obtained as a pale yellow oil (92 mg, 90 %) after column chromatography ( $R_f = 0.4$ , hexane/EtOAc 7:3). FT-IR  $\nu_{\max}/\text{cm}^{-1}$  2979, 1810, 1719, 1450, 1408, 1372, 1263, 1213, 1119, 912, 730.  $^1\text{H NMR}$  (500 MHz,  $\text{CDCl}_3$ )  $\delta$  7.59 (d,  $J = 7.4$  Hz, 2H, Ar-H), 7.52 – 7.47 (m, 1H, Ar-H), 7.39 – 7.19 (m, 7H, Ar-H overlapping  $\text{CHCl}_3$  signal), 4.35 – 4.22 (m, 2H,  $\text{NCH}_2$ ), 4.04 (q,  $J = 7.7$  Hz, 1H,  $\text{OCH}_2$ ), 3.97 – 3.83 (m, 2H, 1H  $\text{NCH}_2$  and 1H  $\text{OCH}_2$ ), 3.71 – 3.54 (m, 1H,  $\text{NCH}_2$ ), 2.59 – 2.51 (m, 1H,  $\text{OCH}_2\text{CH}_2$ ), 2.20 – 2.09 (m, 1H,  $\text{OCH}_2\text{CH}_2$ ), 2.02 – 1.94 (m, 1H,  $\text{OCH}_2\text{CH}_2\text{CH}_2$ ), 1.81 – 1.69 (m, 1H,  $\text{OCH}_2\text{CH}_2\text{CH}_2$ ), 1.30 (s, 9H, 3 x  $\text{CH}_3$ ).  $^{13}\text{C NMR}$  (126 MHz,  $\text{CDCl}_3$ )  $\delta$  156.1 (C=O), 141.7 (Ar- $\text{C}_q$ ), 136.5 (2 x Ar-C), 131.3 (Ar- $\text{C}_q$ ), 129.2 (Ar-C), 129.0 (2 x Ar-C), 128.0 (Ar-C), 127.7 (2 x Ar-C), 127.3 (2 x Ar-C), 88.4 (tetrahydrofuran- $\text{OC}_q$ ), 79.4 ( $\text{OC}(\text{CH}_3)_3$ ), 68.3 ( $\text{OCH}_2$ ), 57.3 (bs, 2 x  $\text{NCH}_2$ ), 54.9 ( $\text{C}_q\text{SPh}$ ), 34.6 ( $\text{OCH}_2\text{CH}_2$ ), 28.4 (3 x  $\text{CH}_3$ ), 25.7 ( $\text{OCH}_2\text{CH}_2\text{CH}_2$ ). HRMS  $m/z$  calculated for  $\text{C}_{24}\text{H}_{29}\text{NNaO}_3\text{S}$  [ $\text{M}+\text{H}$ ] $^+$  434.1760; found 434.1763.

**tert-butyl 3-((2-bromophenyl)thio)-3-(2-(4-methoxyphenyl)tetrahydrofuran-2-yl)azetidine-1-carboxylate **10f****

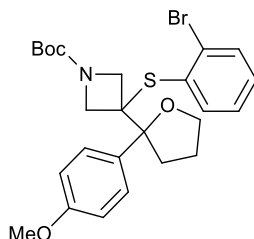

Following the GP4 with **7b** and 2-bromothiophenol, **10f** was obtained as a waxy yellow solid (108 mg, 83 %) after column chromatography ( $R_f = 0.4$ , hexane/EtOAc 7:3). FT-IR  $\nu_{\max}/\text{cm}^{-1}$  2975, 1698, 1609, 1510, 1444, 1299, 1250, 1177, 1054, 912, 829, 755, 732.  $^1\text{H NMR}$  (500 MHz,  $\text{CDCl}_3$ )  $\delta$  7.64 (dd,  $J = 6.8, 2.6$  Hz, 1H, Ar-H), 7.54 (d,  $J = 8.8$  Hz, 2H, Ar-H), 7.30 – 7.25 (m, 1H, Ar-H), 7.19 – 7.12 (m, 2H, Ar-H), 6.89 – 6.85 (m, 2H, Ar-H), 4.37 (d,  $J = 9.7$  Hz, 1H,  $\text{NCH}_2$ ), 4.25 – 4.17 (m, 1H,  $\text{NCH}_2$ ), 4.04 (q,  $J = 7.7$  Hz, 1H,  $\text{OCH}_2$ ), 3.87 (td,  $J = 8.3, 5.0$  Hz, 1H,  $\text{OCH}_2$ ), 3.84 – 3.63 (m, 5H, 2H  $\text{NCH}_2$  and 3H  $\text{OCH}_3$ ), 2.60 (ddd,  $J = 12.7, 7.9, 3.1$  Hz, 1H,  $\text{OCH}_2\text{CH}_2$ ), 2.28 – 2.17 (m, 1H,  $\text{OCH}_2\text{CH}_2$ ), 2.05 – 1.95 (m, 1H,  $\text{OCH}_2\text{CH}_2\text{CH}_2$ ), 1.82 – 1.70 (m, 1H,  $\text{OCH}_2\text{CH}_2\text{CH}_2$ ), 1.31 (bs, 9H, 3 x  $\text{CH}_3$ ).  $^{13}\text{C NMR}$  (126 MHz,  $\text{CDCl}_3$ )  $\delta$  159.3 (C=O), 156.1 (Ar- $\text{C}_q$ ), 137.2 (Ar-C), 133.7 (Ar-C), 133.2 (Ar- $\text{C}_q$ ), 131.4 (Ar- $\text{C}_q$ ), 130.3 (Ar-C), 128.6 (2 x Ar-C), 127.9 (Ar-C), 113.4 (2 x Ar-C), 88.2 (tetrahydrofuran- $\text{OC}_q$ ), 79.4 ( $\text{OC}(\text{CH}_3)_3$ ), 68.3 ( $\text{OCH}_2$ ), 57.8 (bs,  $\text{NCH}_2$ ), 56.8 (bs,  $\text{NCH}_2$ ), 56.2 ( $\text{C}_q\text{SPh}$ ), 55.3 ( $\text{OCH}_3$ ), 34.3 ( $\text{OCH}_2\text{CH}_2$ ), 28.5 (3 x  $\text{CH}_3$ ), 25.8 ( $\text{OCH}_2\text{CH}_2\text{CH}_2$ ). HRMS  $m/z$  calculated for  $\text{C}_{25}\text{H}_{30}\text{BrNNaO}_4\text{S}$  [ $\text{M}+\text{H}$ ] $^+$  542.0977; found 542.0966.

**1-(1-azabicyclo[1.1.0]butan-3-yl)-1-phenylhexan-1-ol **14****

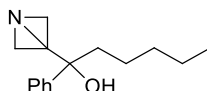

To a stirred solution of **5a** (40 mg, 0.23 mmol) in dry ethyl ether (3 mL) at  $-78^\circ\text{C}$ , butylmagnesium chloride (2.0 M in ethyl ether, 0.138 mL) was added dropwise. The reaction mixture was allowed to warm at room temperature in 15 minutes and quenched with water (1 mL). The crude was extracted with EtOAc (3 x 3 mL) and the combined organic layers were dried over  $\text{Na}_2\text{SO}_4$ , filtered and concentrated under reduced pressure. Compound **14** was obtained as a pale yellow oil (29 mg, 55 %) after column chromatography ( $R_f = 0.6$ , hexane/EtOAc 6:4). FT-IR  $\nu_{\max}/\text{cm}^{-1}$  3270, 2928, 1494, 1447, 1217, 1129, 1068, 1034, 920, 825, 705.  $^1\text{H NMR}$  (500 MHz,  $\text{CDCl}_3$ )  $\delta$  7.50 – 7.46 (m, 2H, Ar-H), 7.38 – 7.33 (m, 2H, Ar-H), 7.29 – 7.24 (m, 1H, Ar-H overlapping  $\text{CHCl}_3$ ), 2.56 (dd,  $J = 6.7, 2.7$  Hz, 1H,  $\text{NCH}_2$ ), 2.27 (dd,  $J = 6.7, 2.8$  Hz, 1H,  $\text{NCH}_2$ ), 1.96 (ddd,  $J = 13.7, 12.1, 4.5$

Hz, 1H, pentyl-CH<sub>2</sub>), 1.80 (ddd, *J* = 13.7, 11.9, 4.5 Hz, 1H, pentyl-CH<sub>2</sub>), 1.46 – 1.34 (m, 2H, 1H pentyl-CH<sub>2</sub> and 1H NCH<sub>2</sub>), 1.30 – 1.15 (m, 5H, 4H pentyl-CH<sub>2</sub> and 1H NCH<sub>2</sub>), 1.10 – 1.00 (m, 1H, pentyl-CH<sub>2</sub>), 0.82 (t, *J* = 6.9 Hz, 3H, pentyl-CH<sub>3</sub>). <sup>13</sup>C NMR (126 MHz, CDCl<sub>3</sub>) δ 143.5 (Ar-C<sub>q</sub>), 128.2 (2 x Ar-C), 127.1 (Ar-C), 125.8 (2 x Ar-C), 73.3 (C<sub>q</sub>OH), 54.1 (NCH<sub>2</sub>), 54.0 (NCH<sub>2</sub>), 40.8 (pentyl-CH<sub>2</sub>), 38.0 (NC<sub>q</sub>), 32.2 (pentyl-CH<sub>2</sub>), 22.9 (pentyl-CH<sub>2</sub>), 22.6 (pentyl-CH<sub>2</sub>), 14.1 (pentyl-CH<sub>3</sub>). HRMS *m/z* calculated for C<sub>15</sub>H<sub>22</sub>NO [M+H]<sup>+</sup> 232.1701; found 232.1702.

### **tert-butyl 4-(hydroxydiphenylmethyl)-3-(2-(p-tolyl)tetrahydrofuran-2-yl)azete-1(2H)-carboxylate 15**

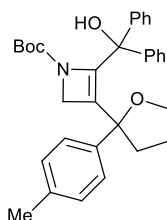

To a stirred solution of **10d** (60 mg, 0.15 mmol) and benzophenone (55 mg, 0.3 mmol) in dry THF (2 mL) at -78°C, LDA (2.0 M in THF/heptane/ethylbenzene, 0.175 mL) was added dropwise. The reaction mixture was allowed to warm at room temperature in 15 minutes and quenched with water (1 mL). The crude was extracted with EtOAc (3 x 3 mL) and the combined organic layers were dried over Na<sub>2</sub>SO<sub>4</sub>, filtered and concentrated under reduced pressure. Compound **15** was obtained as a pale yellow oil (63 mg, 85 %) after column chromatography (*R<sub>f</sub>* = 0.6, hexane/EtOAc 8:2). FT-IR *v*<sub>max</sub>/cm<sup>-1</sup> 3272, 1673, 1448, 1416, 1368, 1239, 1156, 1047, 910, 873, 813, 758, 700. <sup>1</sup>H NMR (500 MHz, CDCl<sub>3</sub>) δ 7.48 – 7.44 (m, 2H, Ar-H), 7.35 – 7.23 (m, 8H, Ar-H), 7.09 (s, 4H, Ar-H), 4.10 (s, 1H, NCH<sub>2</sub>), 3.66 – 3.52 (m, 2H, OCH<sub>2</sub>), 2.33 (s, 3H, CH<sub>3</sub>), 1.67 – 1.46 (m, 4H, OCH<sub>2</sub>CH<sub>2</sub>CH<sub>2</sub>), 1.28 (s, 9H, 3 x CH<sub>3</sub>). <sup>13</sup>C NMR (126 MHz, CDCl<sub>3</sub>) δ 152.1 (C=O), 145.8 (C<sub>q</sub>), 144.2 (C<sub>q</sub>), 143.6 (C<sub>q</sub>), 141.3 (C<sub>q</sub>), 136.8 (C<sub>q</sub>), 128.9 (2 x Ar-C), 128.5 (2 x Ar-C), 128.2 (2 x Ar-C), 128.0 (2 x Ar-C), 127.9 (C<sub>q</sub>), 127.8 (2 x Ar-C), 127.8 (Ar-C), 127.7 (Ar-C), 125.5 (2 x Ar-C), 83.8 (C<sub>q</sub>), 81.3 (C<sub>q</sub>), 77.6 (C<sub>q</sub>), 66.6 (OCH<sub>2</sub>), 55.0 (NCH<sub>2</sub>), 36.2 (OCH<sub>2</sub>CH<sub>2</sub>), 28.3 (3 x CH<sub>3</sub>), 25.7 (OCH<sub>2</sub>CH<sub>2</sub>CH<sub>2</sub>), 21.2 (Ar-CH<sub>3</sub>). HRMS *m/z* calculated for C<sub>32</sub>H<sub>35</sub>NNaO<sub>4</sub> [M+Na]<sup>+</sup> 520.2464; found 520.2475.

### **3-(3,3-dibutyl-1-phenylaziridin-2-yl)-1-azabicyclo[1.1.0]butane 18**

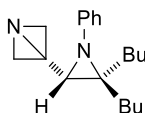

Following the GP1 with **16** as electrophile, **18** was obtained as a pale yellow oil (94 mg, 80 %) after column chromatography (*R<sub>f</sub>* = 0.6, hexane/EtOAc 8:2). FT-IR *v*<sub>max</sub>/cm<sup>-1</sup> 2956, 2930, 1598, 1488, 1455, 1287, 1263, 1172, 1127, 946, 765, 696. <sup>1</sup>H NMR (500 MHz, CDCl<sub>3</sub>) δ 7.23 – 7.15 (m, 2H, Ar-H), 6.93 (tt, *J* = 7.4, 1.1 Hz, 1H, Ar-H), 6.87 – 6.83 (m, 2H, Ar-H), 2.53 (dd, *J* = 6.4, 2.9 Hz, 1H, NCH<sub>2</sub>), 2.45 (dd, *J* = 6.4, 2.5 Hz, 1H, NCH<sub>2</sub>), 2.33 (s, 1H, aziridinyl-CH), 1.89 – 1.78 (m, 2H, butyl-CH<sub>2</sub>), 1.65 – 1.57 (m, 2H, butyl-CH<sub>2</sub>), 1.53 – 1.15 (m, 9H, 7H butyl-CH<sub>2</sub> and 2H NCH<sub>2</sub>), 0.97 (t, *J* = 7.3 Hz, 3H, butyl-CH<sub>3</sub>), 0.84 (t, *J* = 7.2 Hz, 3H, butyl-CH<sub>3</sub>), 0.56 – 0.48 (m, 1H, butyl-CH<sub>2</sub>). <sup>13</sup>C NMR (126 MHz, CDCl<sub>3</sub>) δ 145.0 (Ar-C<sub>q</sub>), 128.9 (2 x Ar-C), 121.9 (Ar-C), 120.5 (2 x Ar-C), 54.5 (NCH<sub>2</sub>), 54.1 (NCH<sub>2</sub>), 50.5 (aziridinyl-C<sub>q</sub>), 48.1 (aziridinyl-CH), 31.69 (butyl-CH<sub>2</sub>), 31.65 (butyl-CH<sub>2</sub>), 29.2 (ABB-C<sub>q</sub>), 29.0 (butyl-CH<sub>2</sub>), 28.4 (butyl-CH<sub>2</sub>), 23.3 (butyl-CH<sub>2</sub>), 22.8 (butyl-CH<sub>2</sub>), 14.3 (butyl-CH<sub>3</sub>), 14.2 (butyl-CH<sub>3</sub>). HRMS *m/z* calculated for C<sub>19</sub>H<sub>29</sub>N<sub>2</sub> [M+H]<sup>+</sup> 285.2331; found 285.2340.

### **N-((1-azabicyclo[1.1.0]butan-3-yl)(phenyl)methyl)-N-(tert-butyl)hydroxylamine 19**

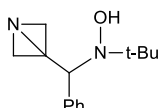

Following the GP1 with **17** as electrophile, **19** was obtained as a white waxy solid (91 mg, 95%) after washing the crude with ethyl ether (4 mL). FT-IR  $\nu_{\max}/\text{cm}^{-1}$  2971, 2934, 1703, 1453, 1363, 1327, 1219, 1075, 1028, 939, 901, 833, 701.  $^1\text{H}$  NMR (300 MHz,  $\text{CDCl}_3$ )  $\delta$  7.51 – 7.45 (m, 2H, Ar-H), 7.34 – 7.22 (m, 3H, Ar-H), 5.16 (bs, 1H, OH), 4.47 (s, 1H, CHPh), 2.38 (dd,  $J = 6.6, 2.8$  Hz, 1H,  $\text{NCH}_2$ ), 2.15 (dd,  $J = 6.6, 2.8$  Hz, 1H,  $\text{NCH}_2$ ), 1.29 (d,  $J = 2.8$  Hz, 1H,  $\text{NCH}_2$ ), 1.12 (d,  $J = 2.8$  Hz, 1H,  $\text{NCH}_2$ ), 1.07 (s, 9H,  $\text{C}(\text{CH}_3)_3$ ).  $^{13}\text{C}$  NMR (126 MHz,  $\text{CDCl}_3$ )  $\delta$  138.6 (Ar- $\text{C}_q$ ), 128.9 (2 x Ar-C), 127.3 (2 x Ar-C), 126.6 (Ar-C), 63.2 (CHPh), 59.0 ( $\text{C}(\text{CH}_3)_3$ ), 54.6 ( $\text{NCH}_2$ ), 51.9 ( $\text{NCH}_2$ ), 32.2 ( $\text{NC}_q$ ), 26.1 ( $\text{C}(\text{CH}_3)_3$ ). HRMS  $m/z$  calculated for  $\text{C}_{14}\text{H}_{21}\text{N}_2\text{O}$   $[\text{M}+\text{H}]^+$  233.1654; found 233.1646.

**tert-butyl 2-(tert-butyl)-3-phenyl-1-oxa-2,6-diazaspiro[3.3]heptane-6-carboxylate **20****

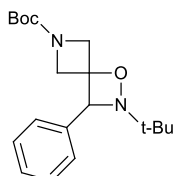

To a stirred solution of **19** (60 mg, 0.26 mmol) and  $\text{Boc}_2\text{O}$  (85 mg, 0.39 mmol) in DCM (2.5 mL), Amberlyst 15 (40 mg) was added. After stirring for 16h at room temperature, the mixture was filtered and the solvent was removed under reduced pressure. Compound **20** was obtained as a pale yellow oil (64 mg, 74 %) after column chromatography ( $R_f = 0.3$ , hexane/EtOAc 9:1). FT-IR  $\nu_{\max}/\text{cm}^{-1}$  2974, 2934, 1704, 1478, 1455, 1393, 1366, 1173, 1100, 898, 766, 700.  $^1\text{H}$  NMR (500 MHz,  $\text{CDCl}_3$ )  $\delta$  7.47 (d,  $J = 7.0$  Hz, 2H, Ar-H), 7.41 (t,  $J = 7.9$  Hz, 2H, Ar-H), 7.36 – 7.31 (m, 1H, Ar-H), 4.91 (s, 1H, CHPh), 4.21 (dd,  $J = 10.8, 1.6$  Hz, 1H,  $\text{NCH}_2$ ), 4.06 (dd,  $J = 10.7, 1.7$  Hz, 1H,  $\text{NCH}_2$ ), 3.90 (dd,  $J = 10.8, 1.6$  Hz, 1H,  $\text{NCH}_2$ ), 3.65 (d,  $J = 10.3$  Hz, 1H,  $\text{NCH}_2$ ), 1.36 (s, 9H,  $\text{OC}(\text{CH}_3)_3$ ), 1.07 (s, 9H,  $\text{NC}(\text{CH}_3)_3$ ).  $^{13}\text{C}$  NMR (126 MHz,  $\text{CDCl}_3$ )  $\delta$  156.2 (C=O), 137.4 (Ar- $\text{C}_q$ ), 129.0 (2 x Ar-C), 128.6 (Ar-C), 127.6 (2 x Ar-C), 80.9 ( $\text{OC}(\text{CH}_3)_3$ ), 79.9 (spiro- $\text{C}_q$ ), 68.2 (CHPh), 62.7 (bs,  $\text{NCH}_2$ ), 59.2 ( $\text{NC}(\text{CH}_3)_3$ ), 59.1 (bs,  $\text{NCH}_2$ ), 28.4 ( $\text{OC}(\text{CH}_3)_3$ ), 23.4 ( $\text{NC}(\text{CH}_3)_3$ ). HRMS  $m/z$  calculated for  $\text{C}_{19}\text{H}_{28}\text{N}_2\text{NaO}_3$   $[\text{M}+\text{Na}]^+$  355.1998; found 355.2003.

## 6. Copy of NMR spectra

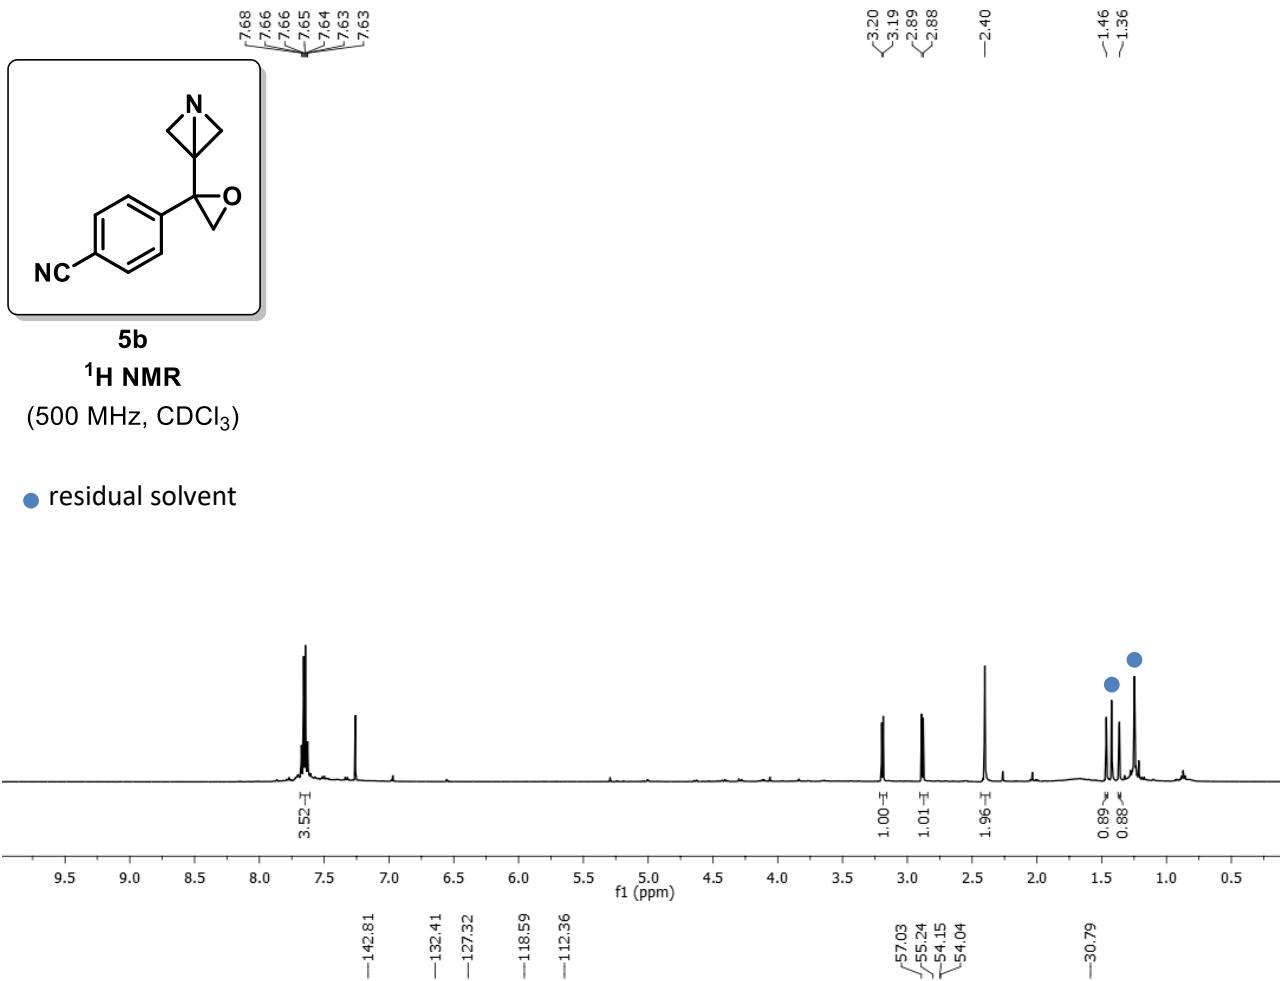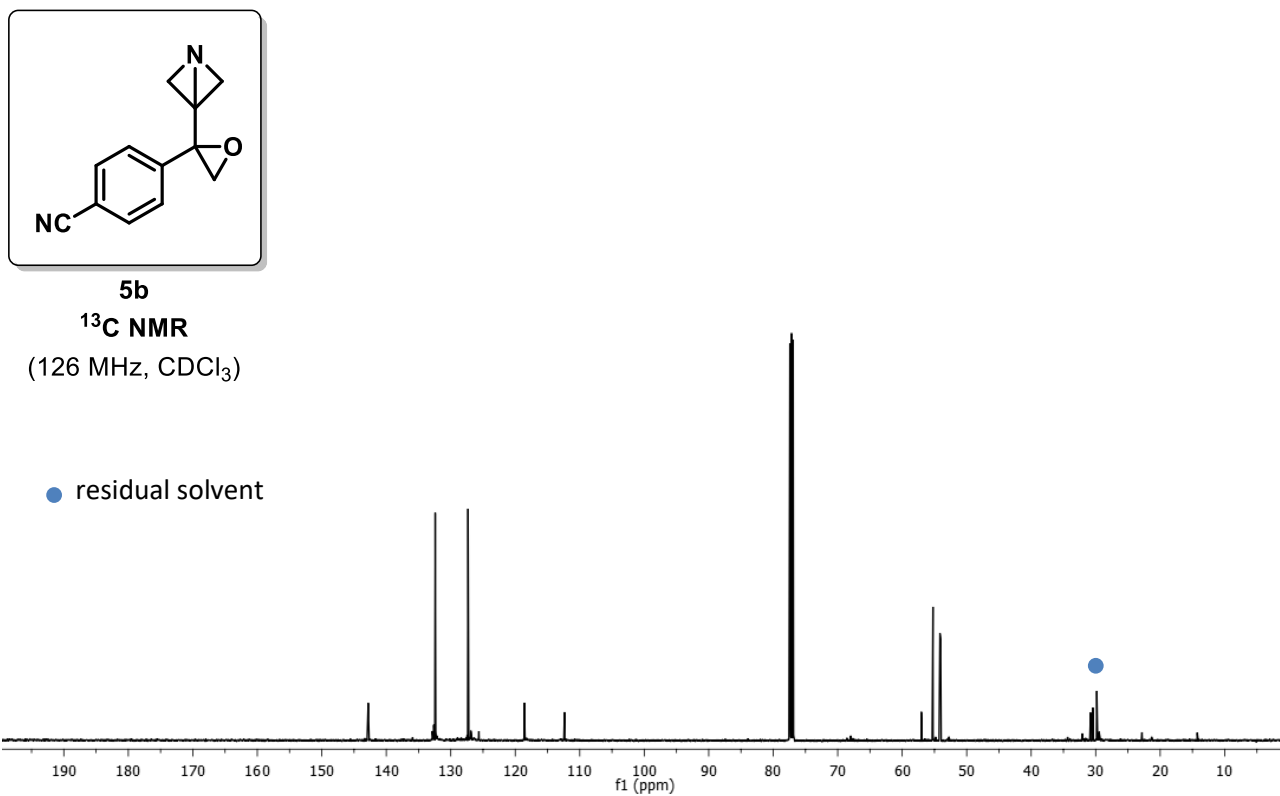

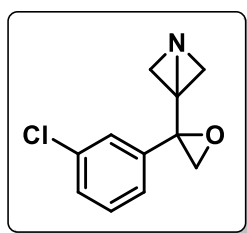

**5c**

**<sup>1</sup>H NMR**

(500 MHz, CDCl<sub>3</sub>)

7.51  
7.50  
7.50  
7.41  
7.40  
7.40  
7.40  
7.39  
7.39  
7.30  
7.30  
7.29

3.14  
3.13  
2.89  
2.88  
2.41  
2.40  
2.40  
2.39  
2.38  
1.44  
1.43  
1.34  
1.34

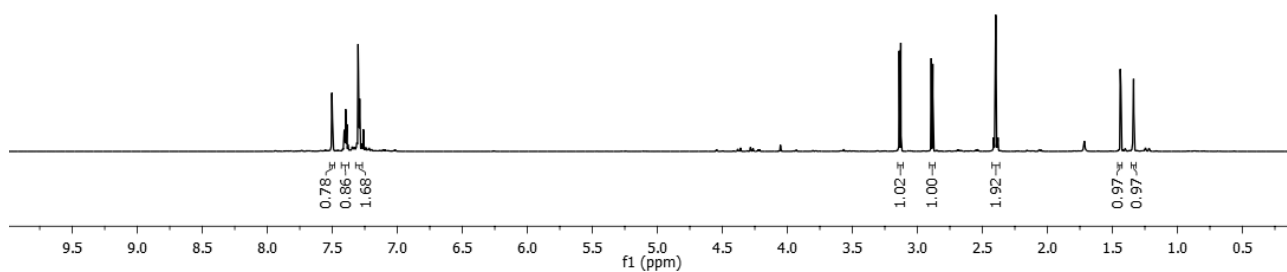

139.55  
134.60  
129.88  
128.61  
126.75  
124.76

56.92  
54.93  
54.06  
54.04

31.14

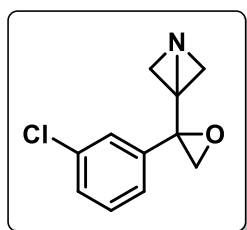

**5c**

**<sup>13</sup>C NMR**

(126 MHz, CDCl<sub>3</sub>)

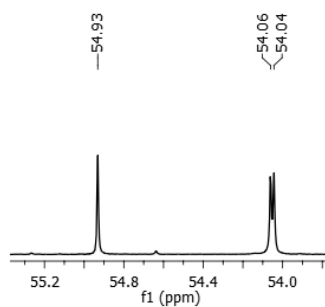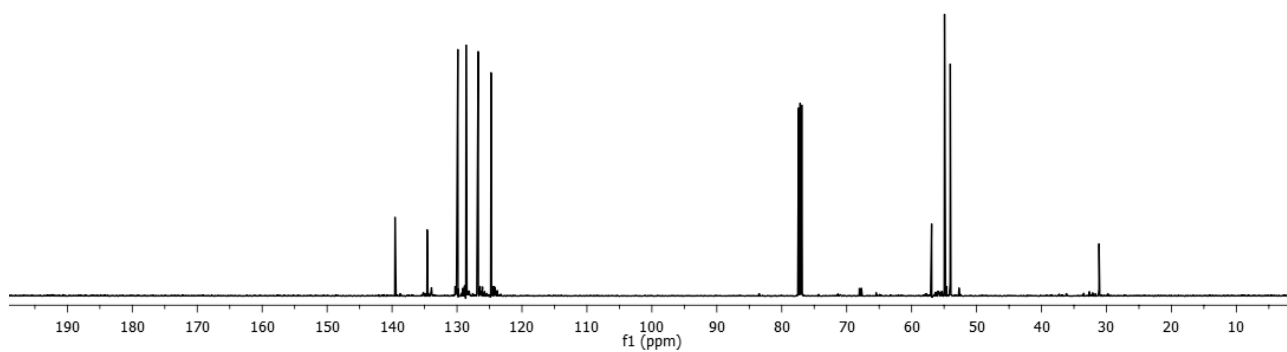

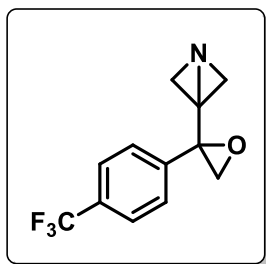

5d

<sup>1</sup>H NMR

(500 MHz, CDCl<sub>3</sub>)

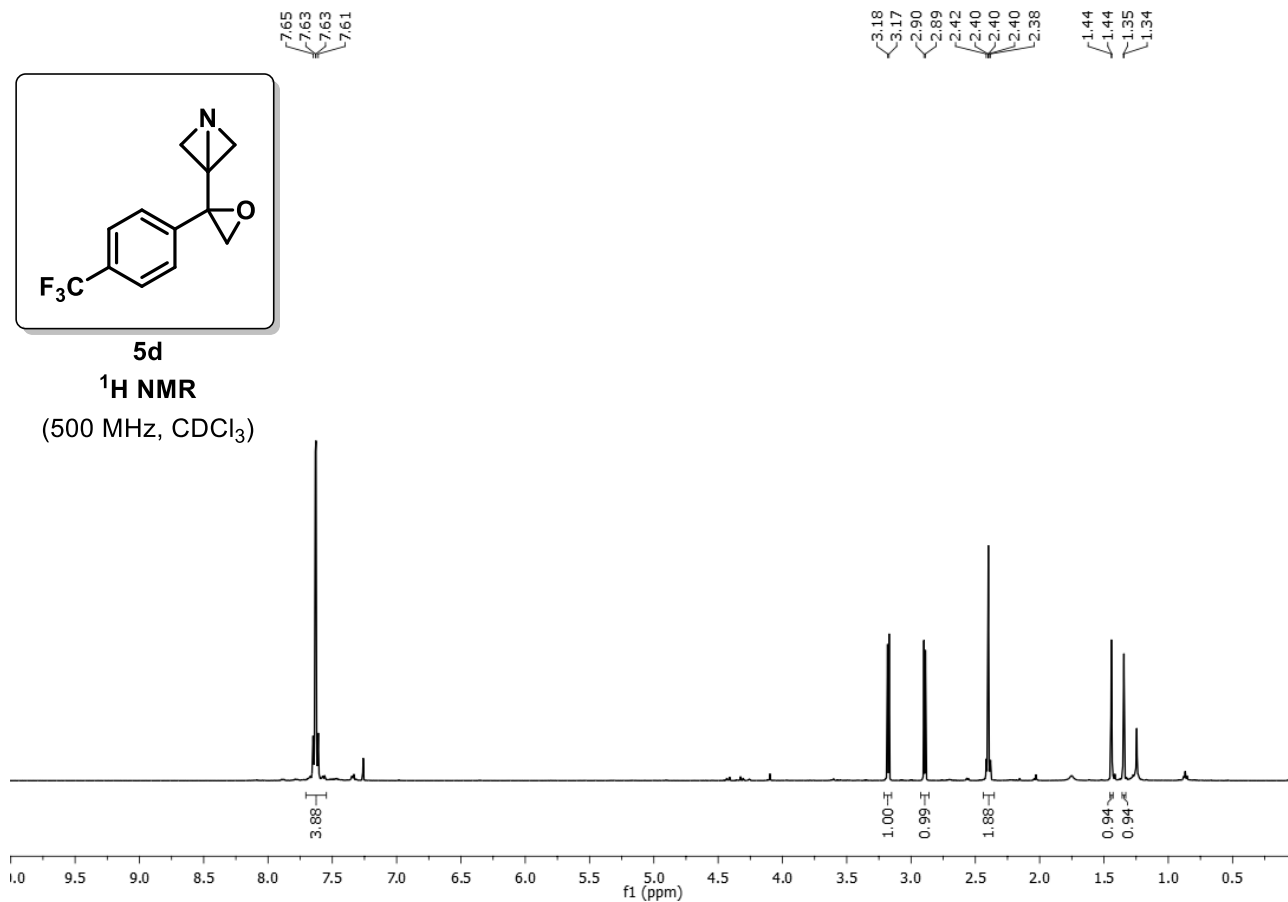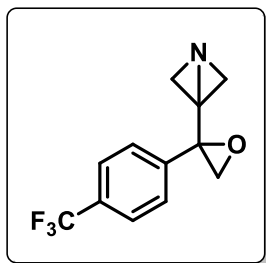

5d

<sup>13</sup>C NMR

(126 MHz, CDCl<sub>3</sub>)

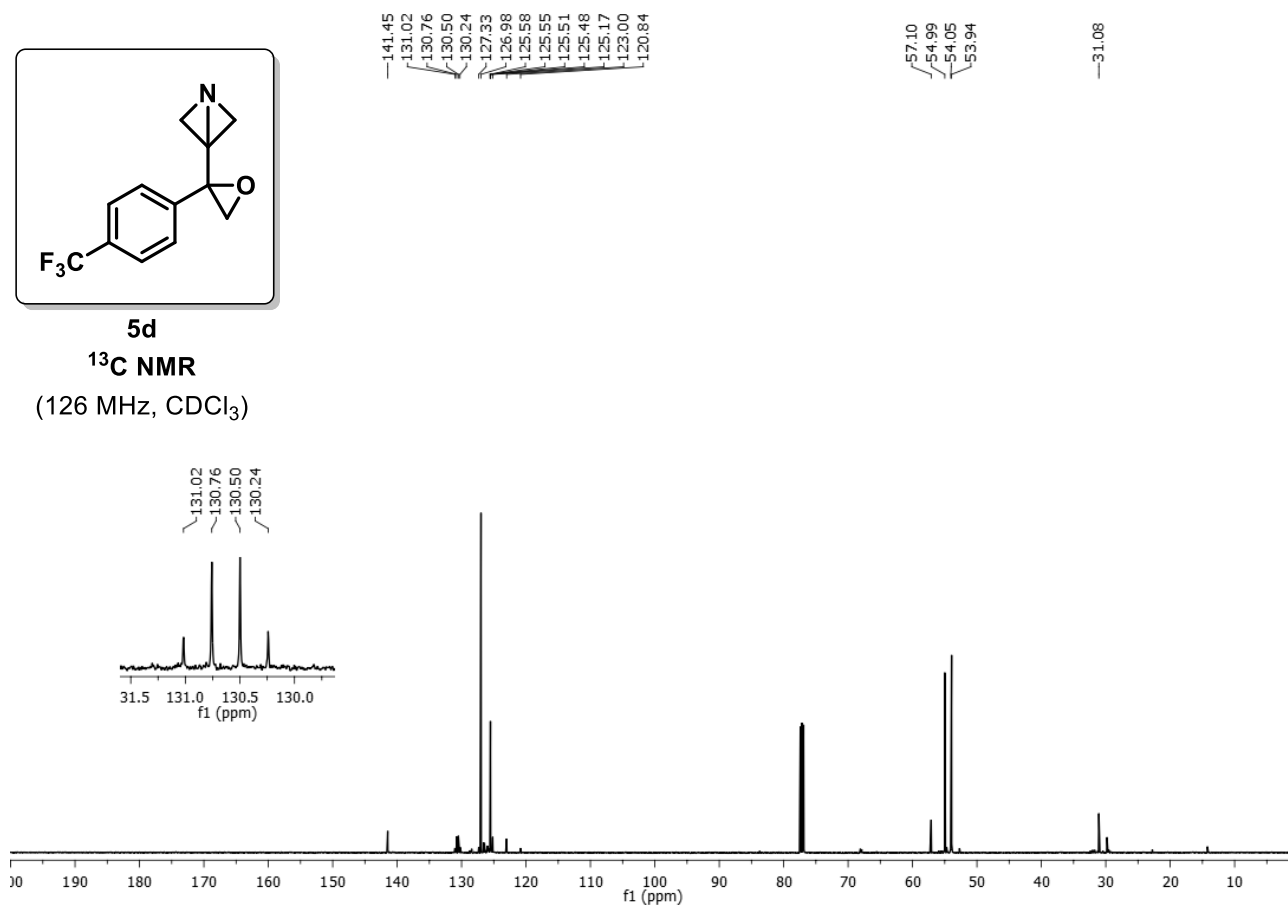

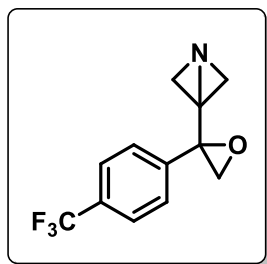

**5d**  
<sup>19</sup>F NMR  
 (282 MHz, CDCl<sub>3</sub>)

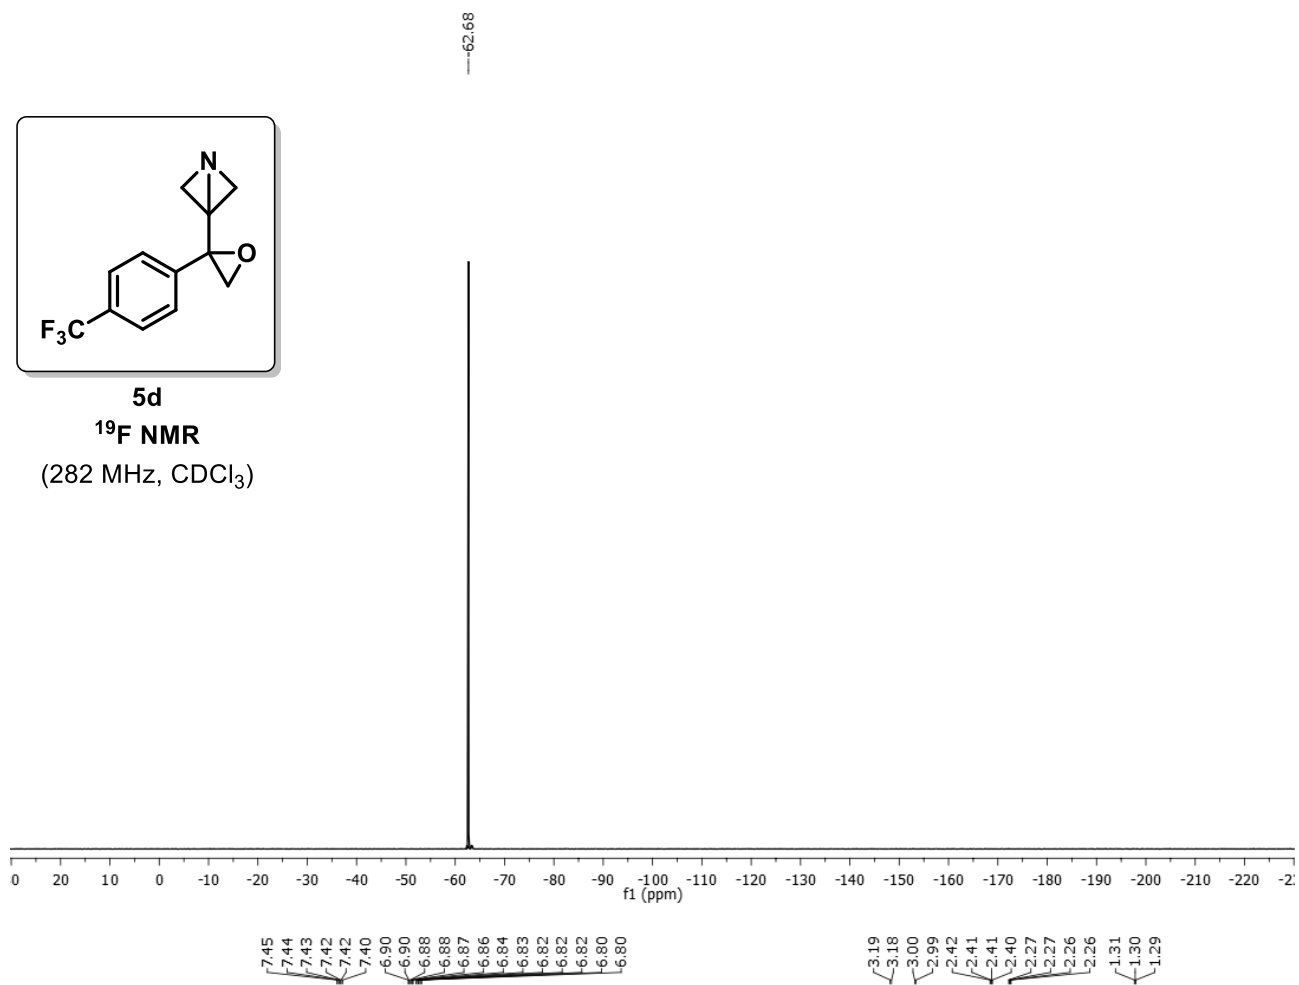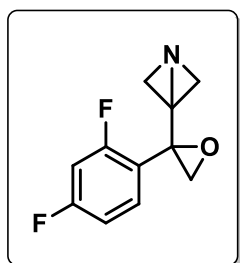

**5e**  
<sup>1</sup>H NMR  
 (500 MHz, CDCl<sub>3</sub>)

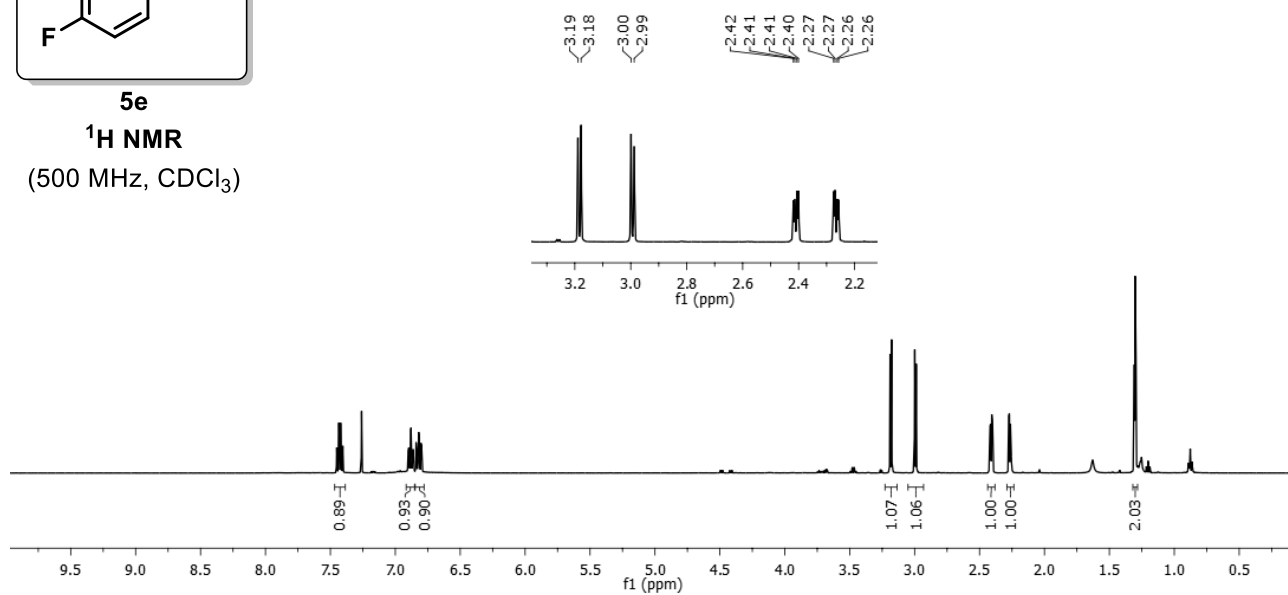

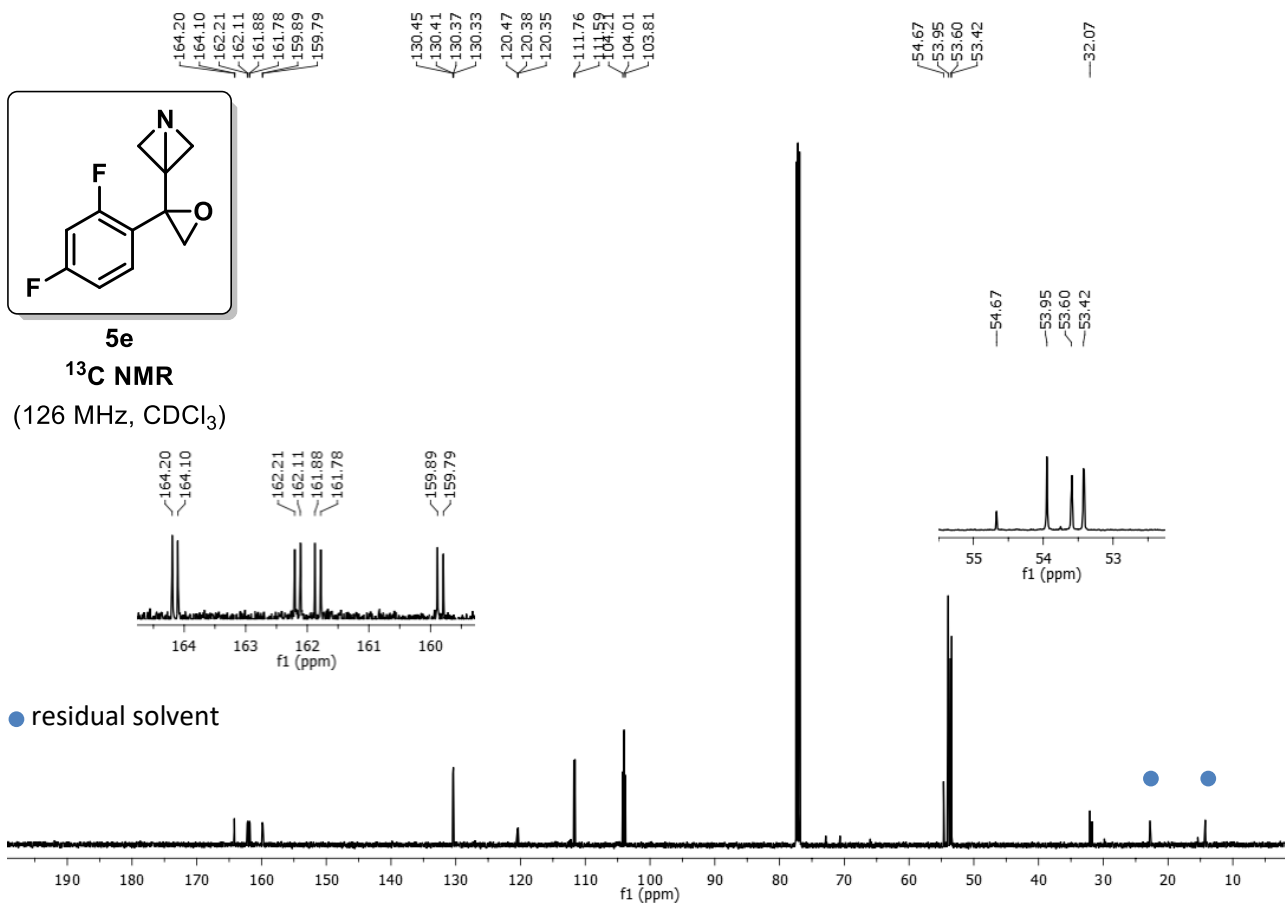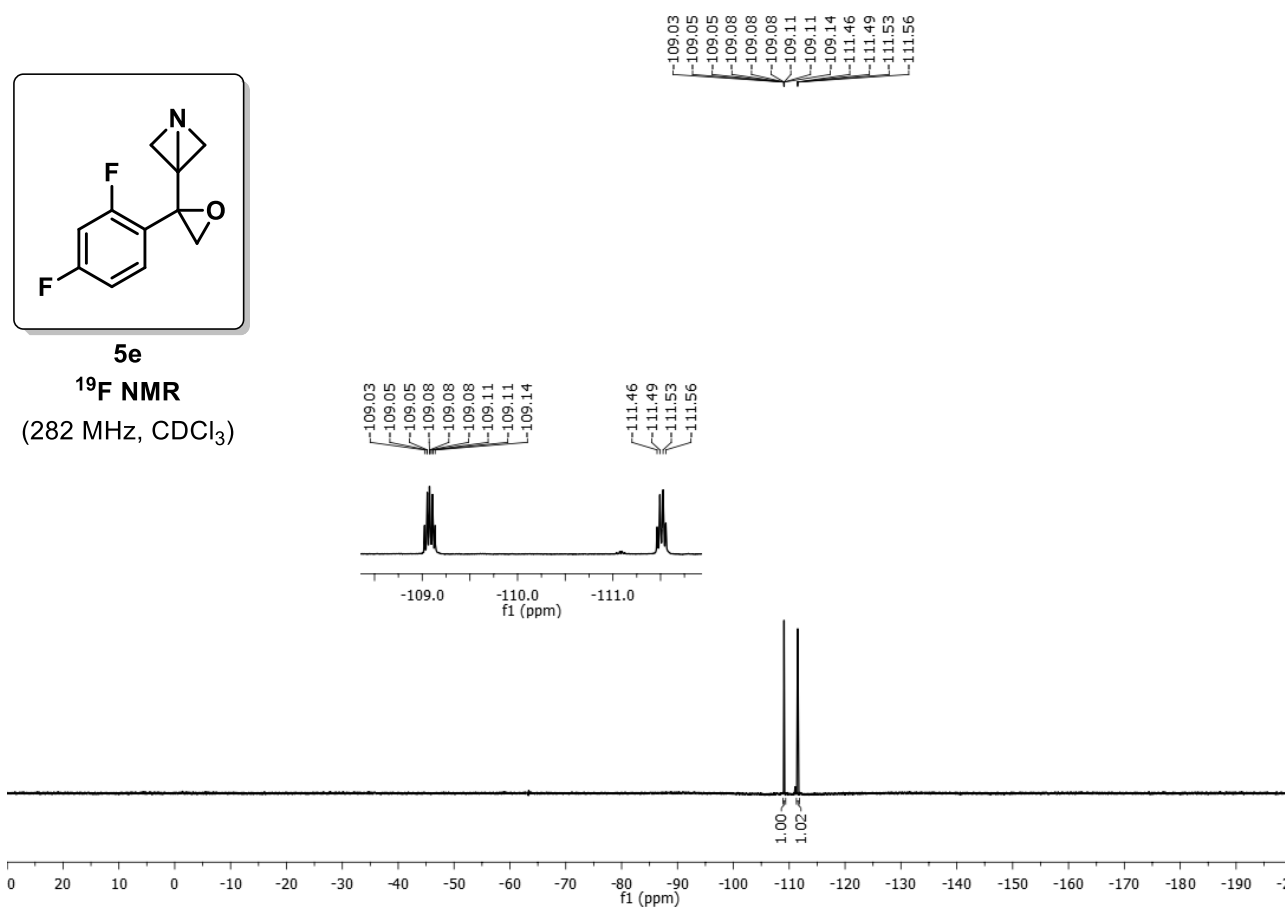



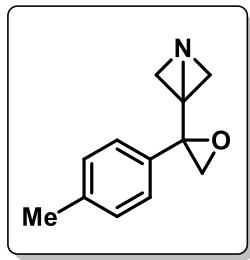

**5f**

**<sup>1</sup>H NMR**

(500 MHz, CDCl<sub>3</sub>)

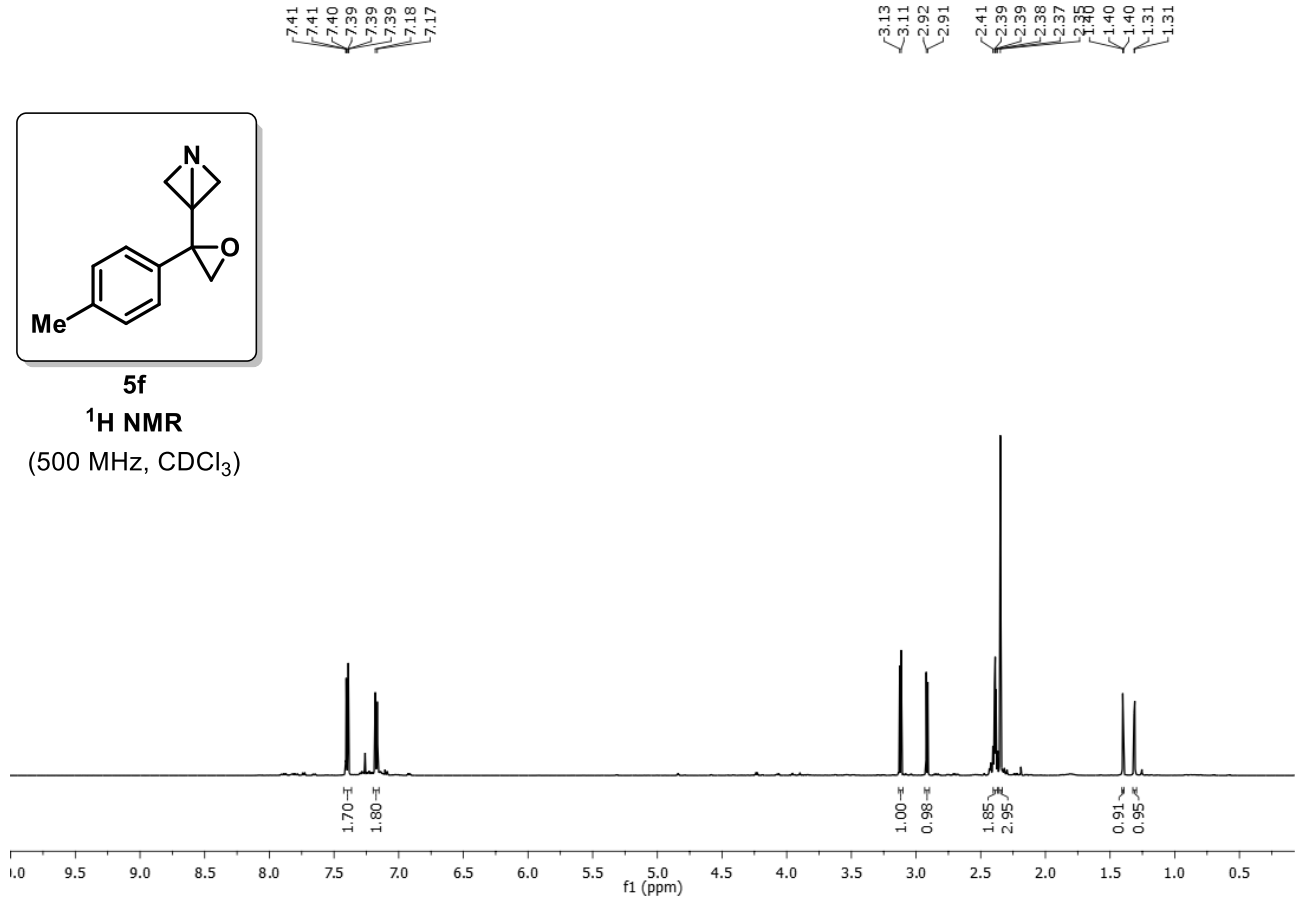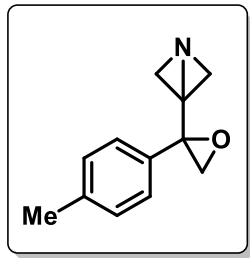

**5f**

**<sup>13</sup>C NMR**

(126 MHz, CDCl<sub>3</sub>)

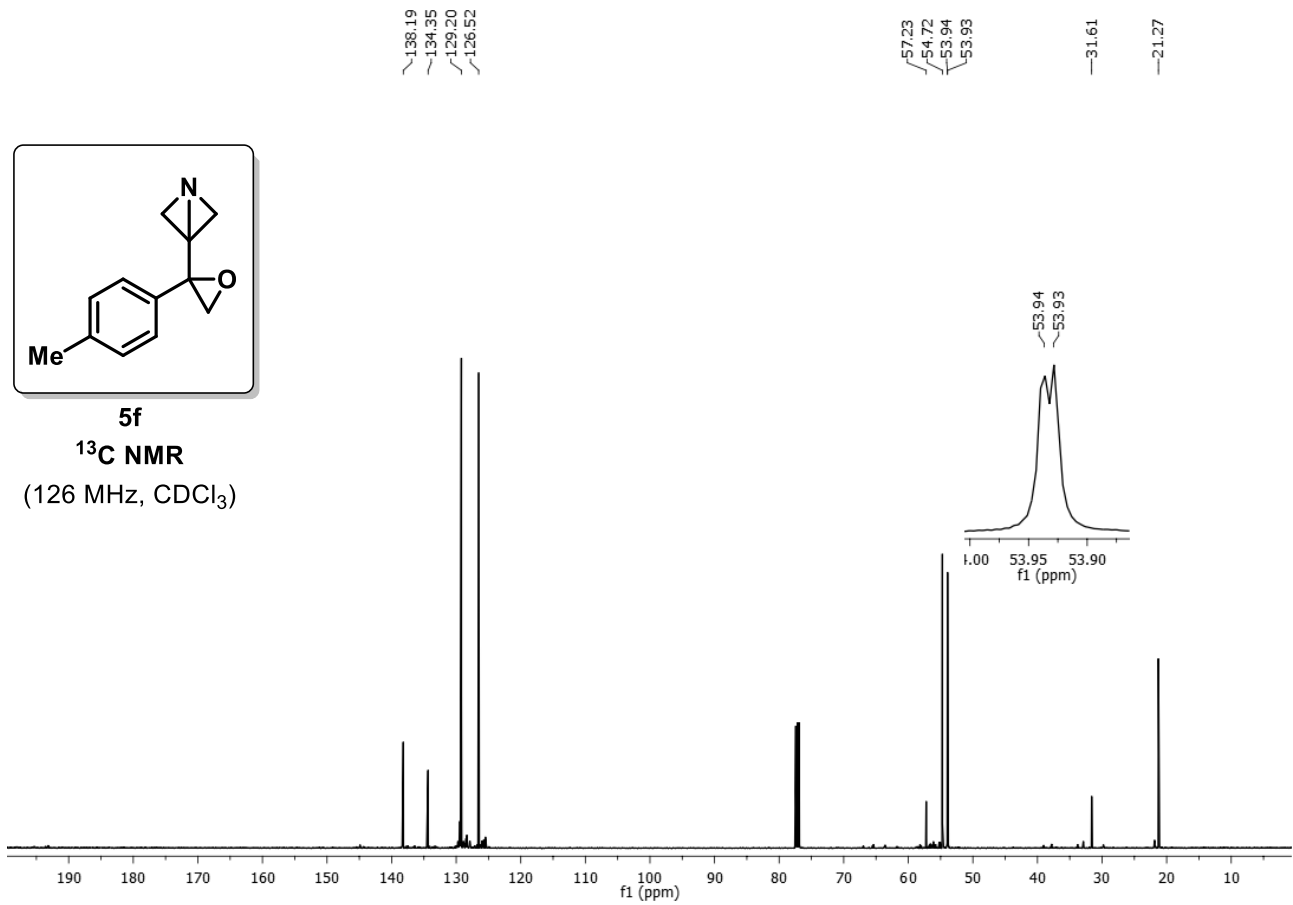

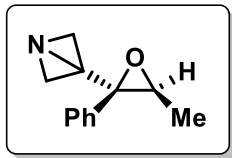

5g

<sup>1</sup>H NMR

(500 MHz, CDCl<sub>3</sub>)

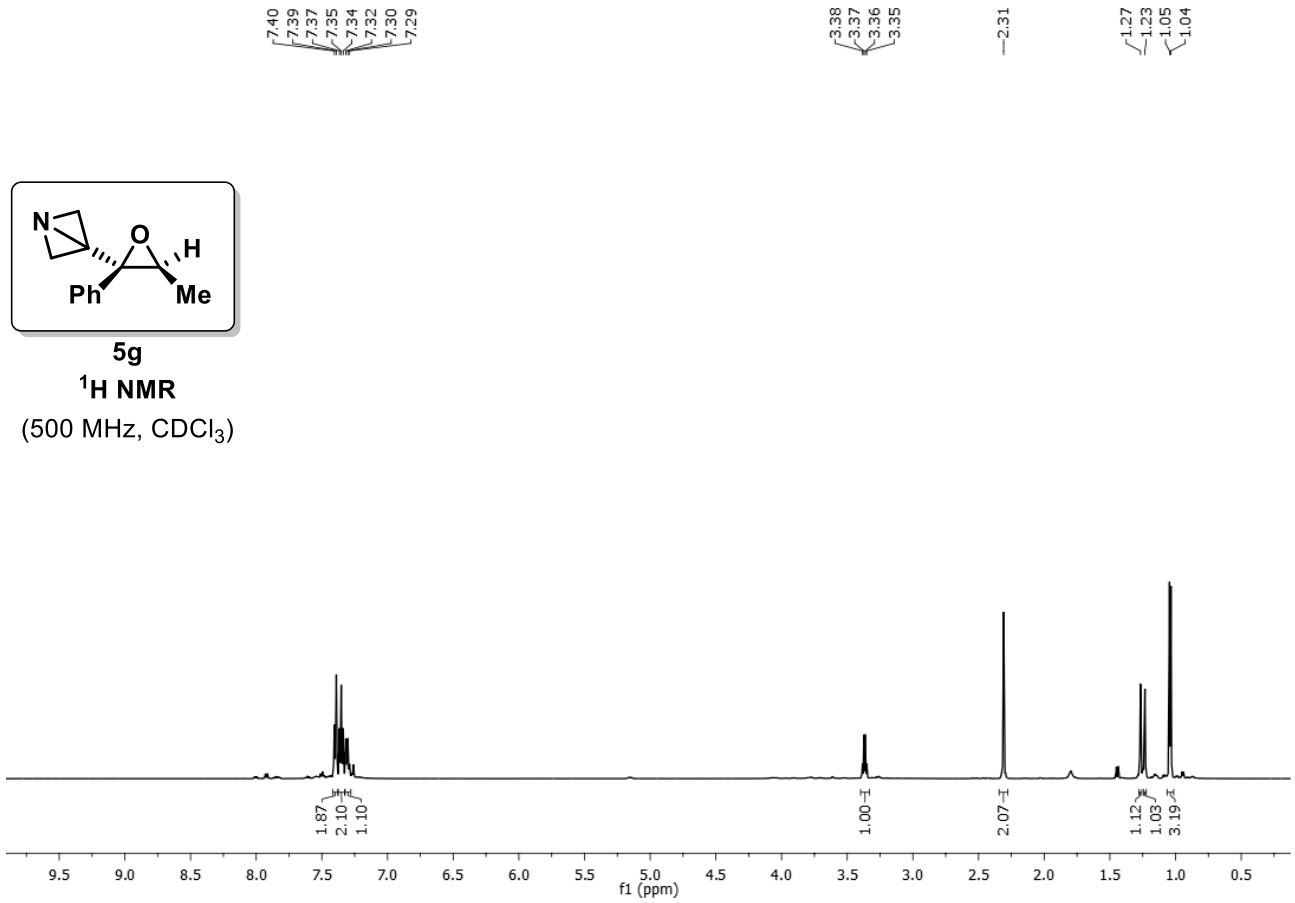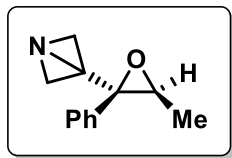

5g

<sup>13</sup>C NMR

(126 MHz, CDCl<sub>3</sub>)

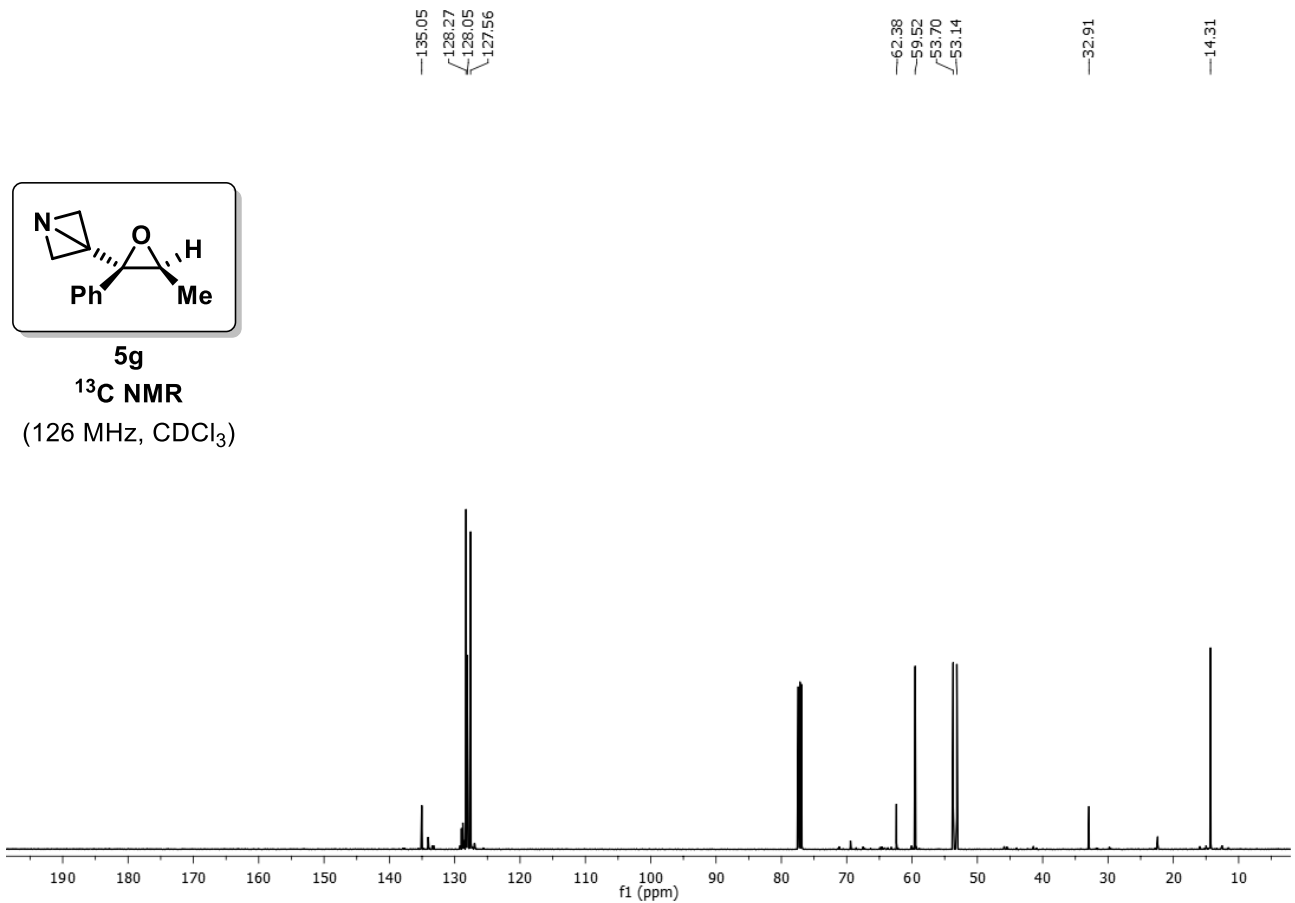

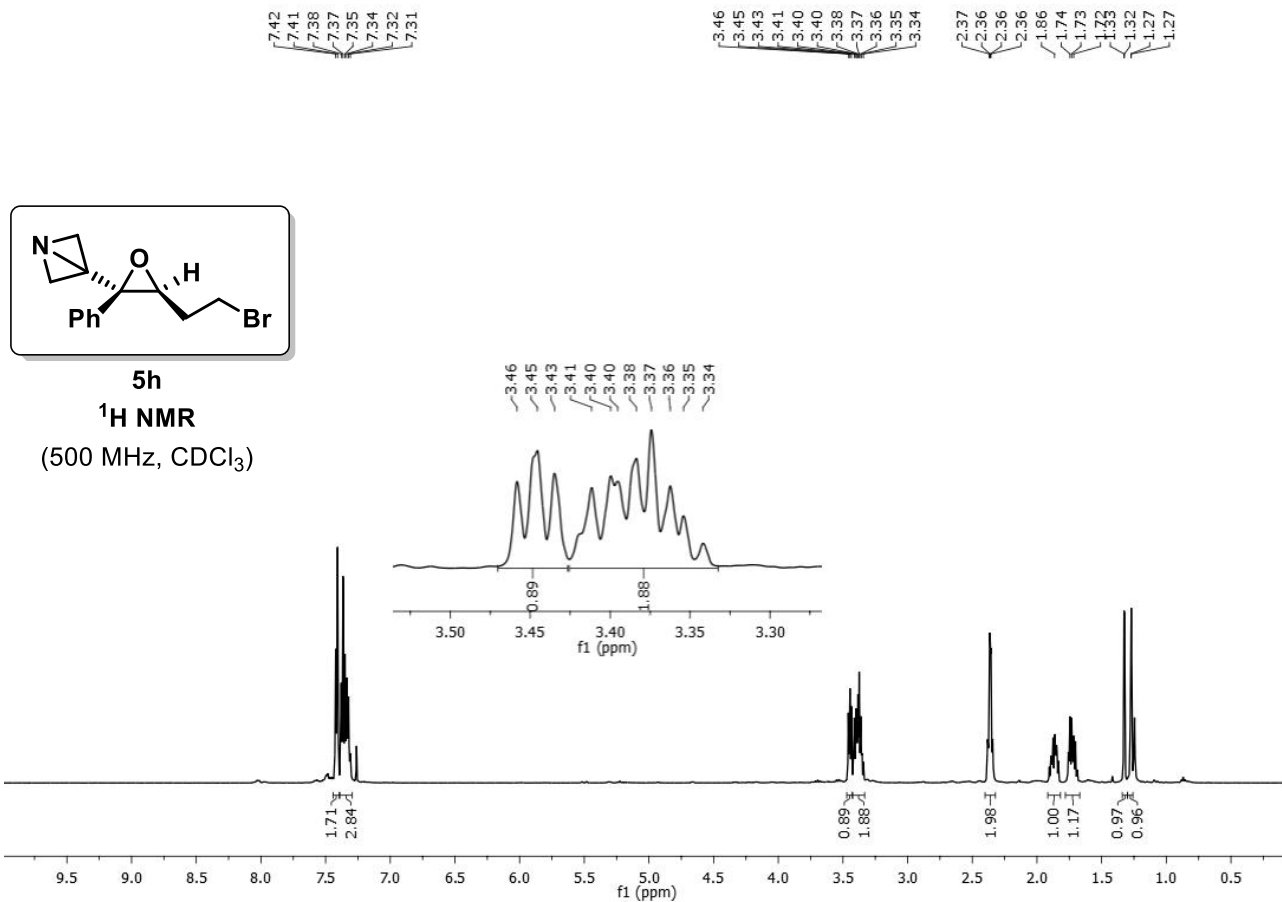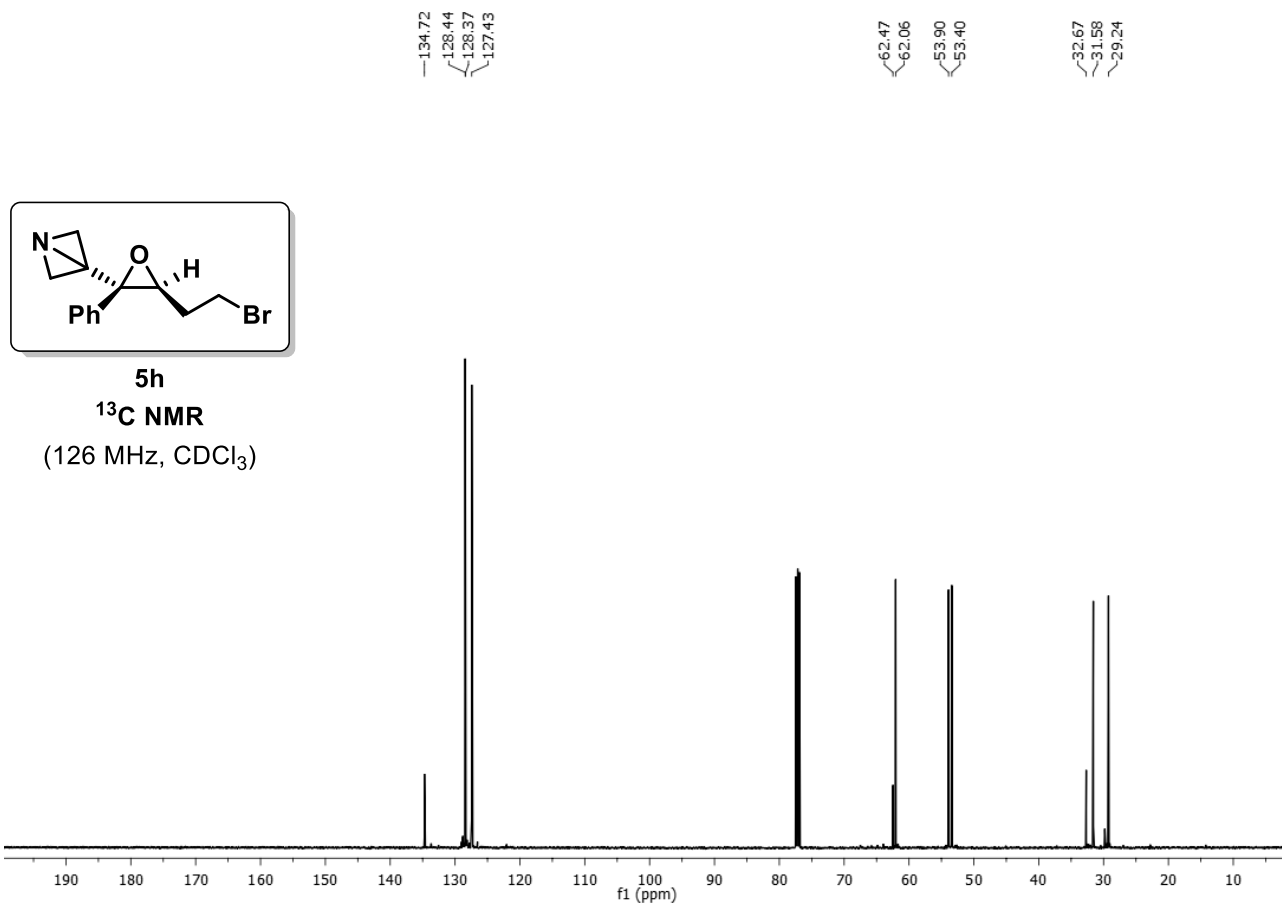

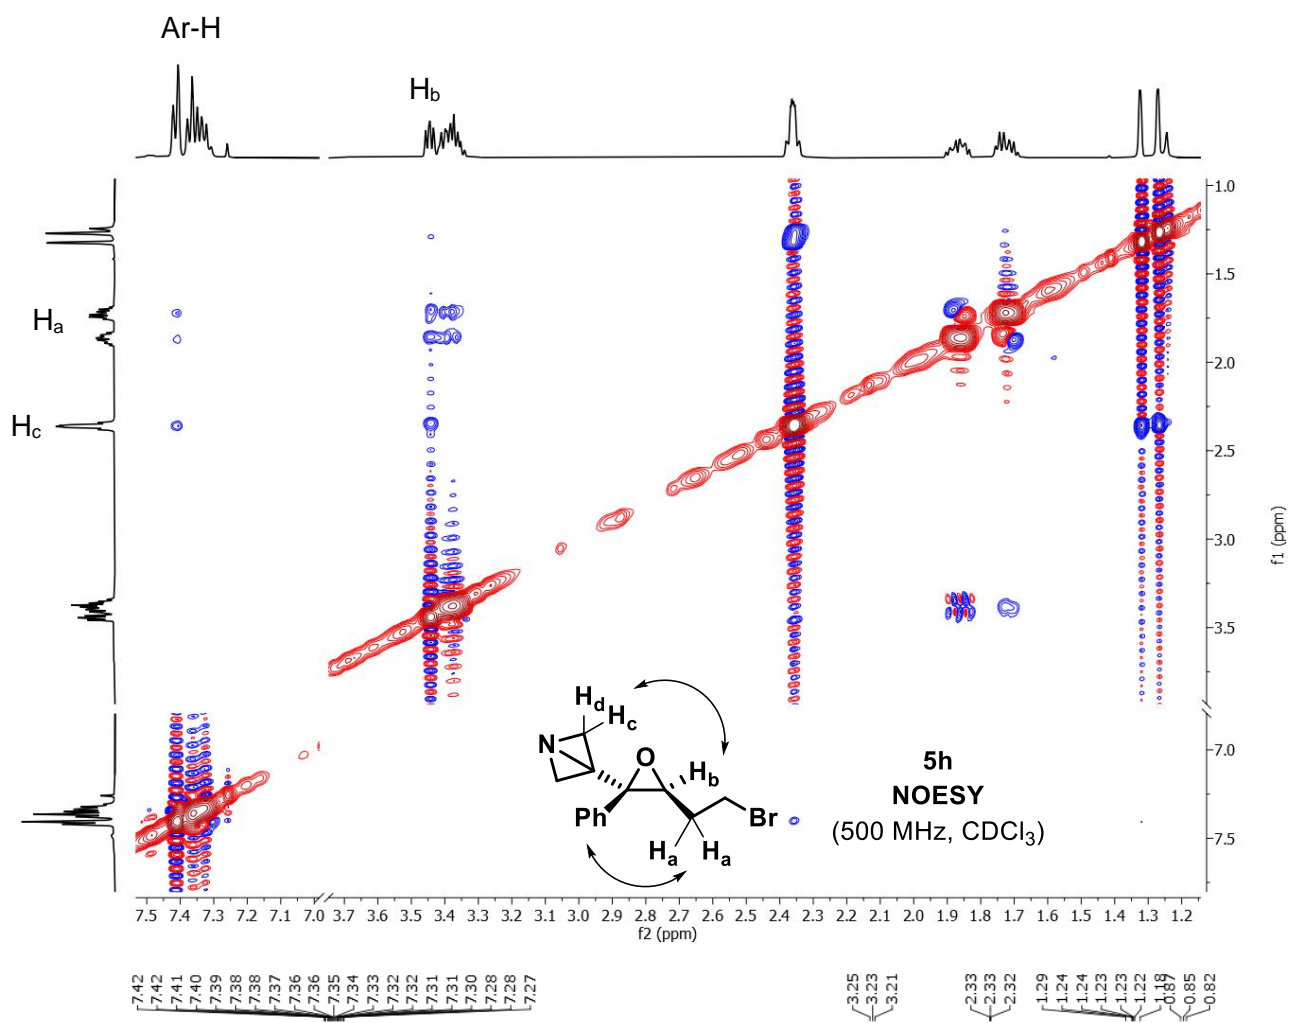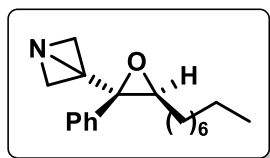

5i  
<sup>1</sup>H NMR  
(300 MHz, CDCl<sub>3</sub>)

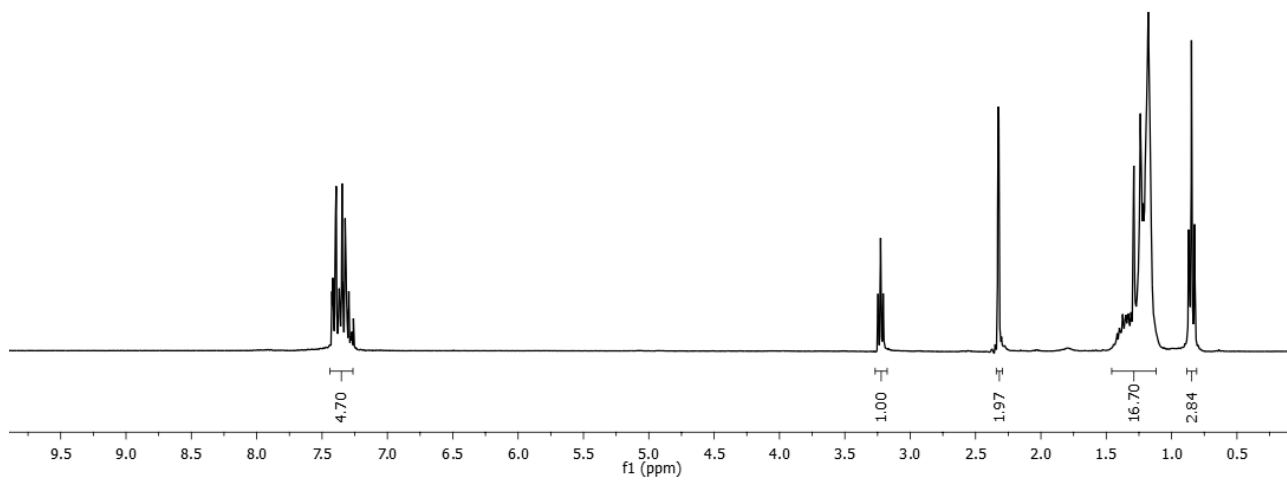

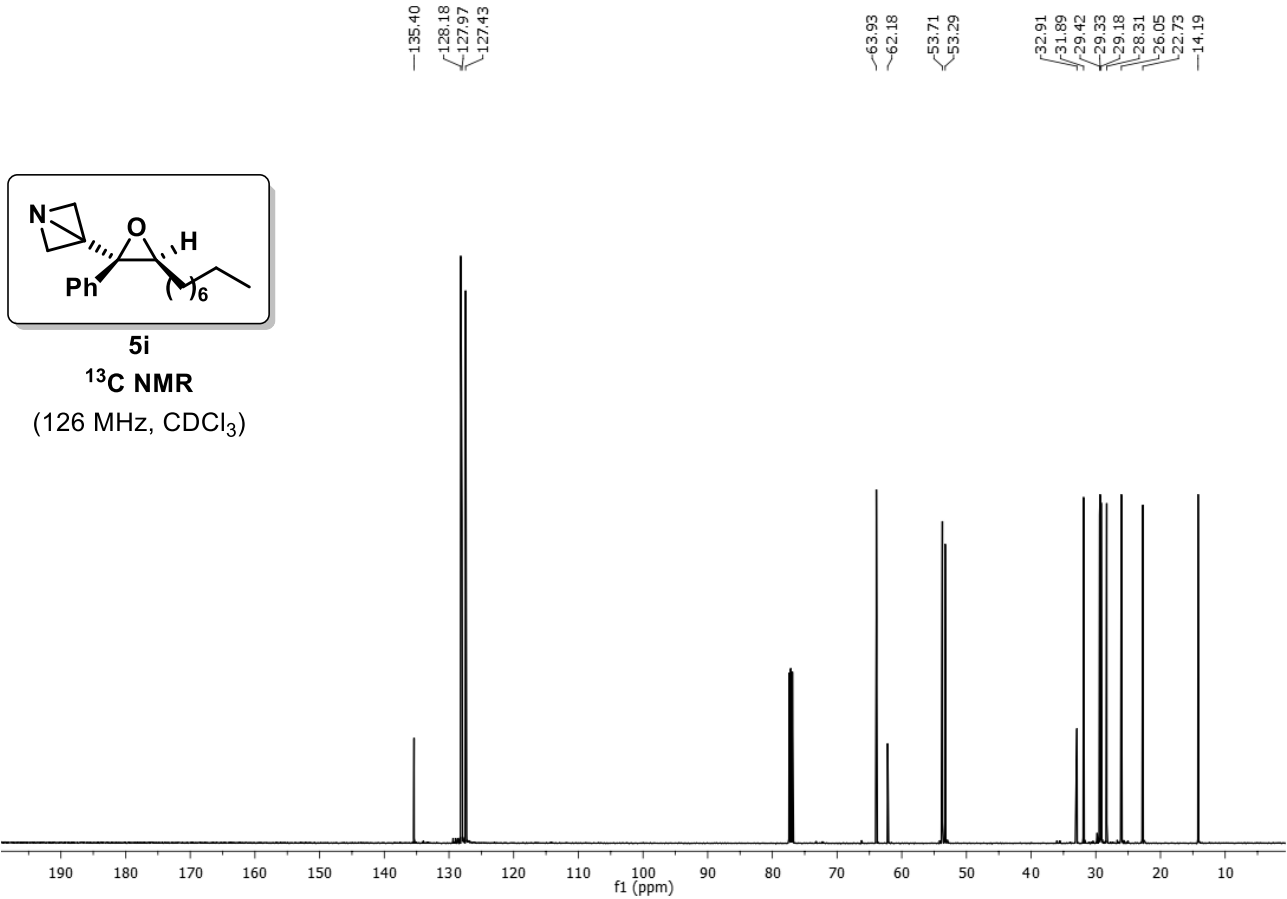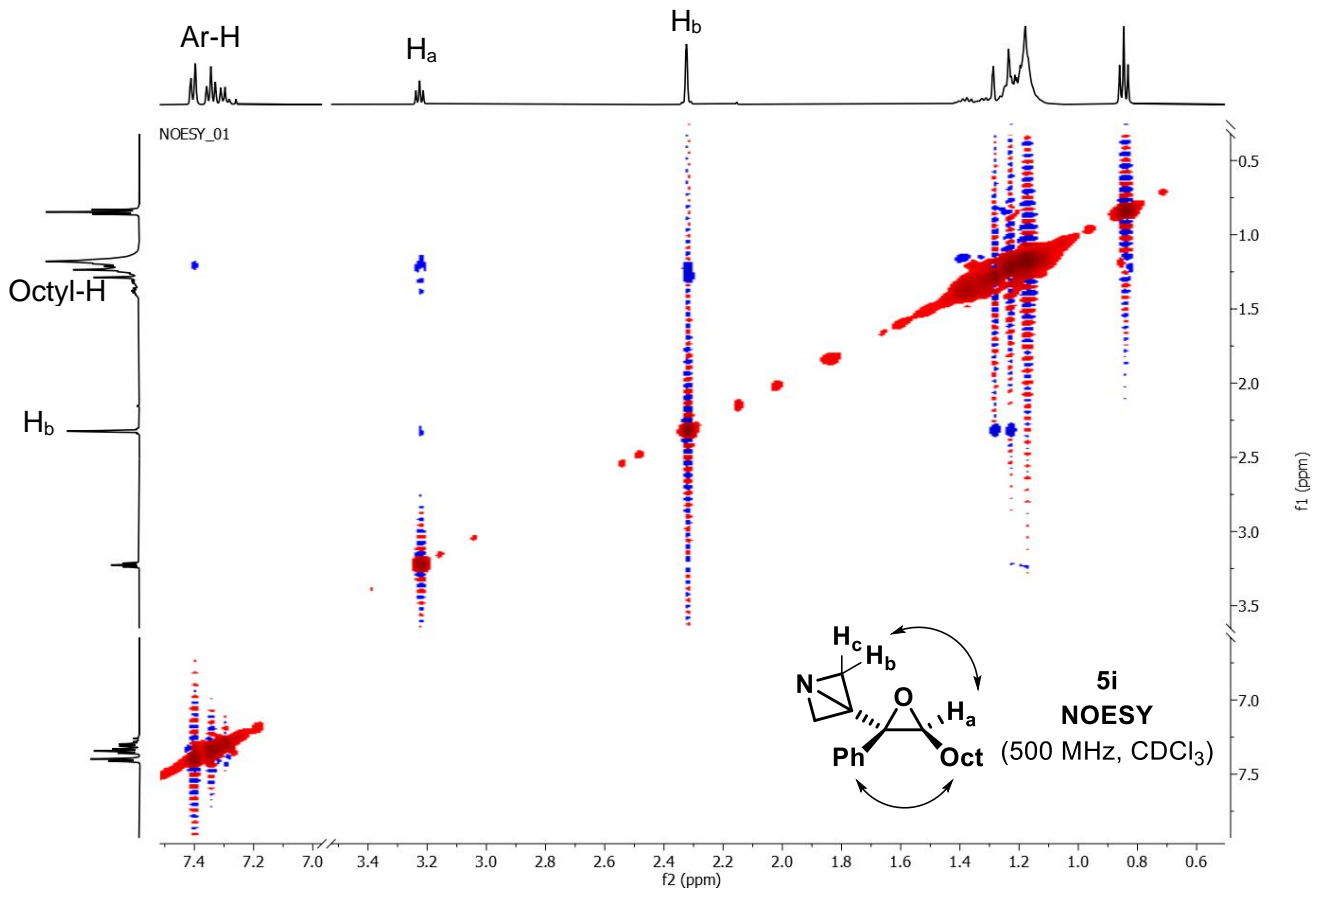

7.40  
7.40  
7.40  
7.38  
7.38  
7.34  
7.34  
7.33  
7.33  
7.32  
7.31  
7.31  
7.28  
7.28  
7.27  
7.27  
7.27  
7.26  
7.26  
7.25  
6.96  
6.93  
6.26  
6.22

3.07  
3.06  
2.92  
2.91  
2.49  
2.48  
2.47  
2.43  
2.43  
1.42  
1.41  
1.41  
1.37  
1.37

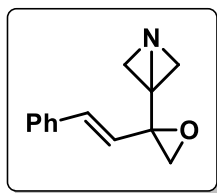

5j

<sup>1</sup>H NMR

(500 MHz, CDCl<sub>3</sub>)

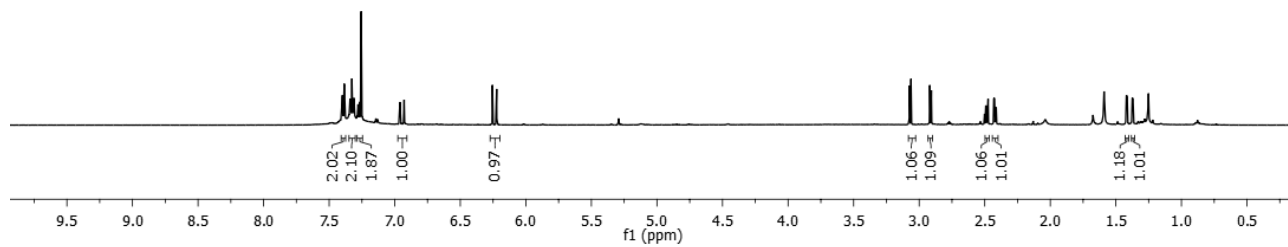

136.08  
133.67  
128.81  
128.37  
126.72  
125.77

56.37  
54.84  
54.24  
54.03  
33.95

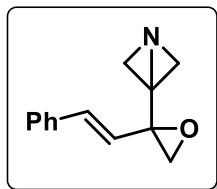

5j

<sup>13</sup>C NMR

(126 MHz, CDCl<sub>3</sub>)

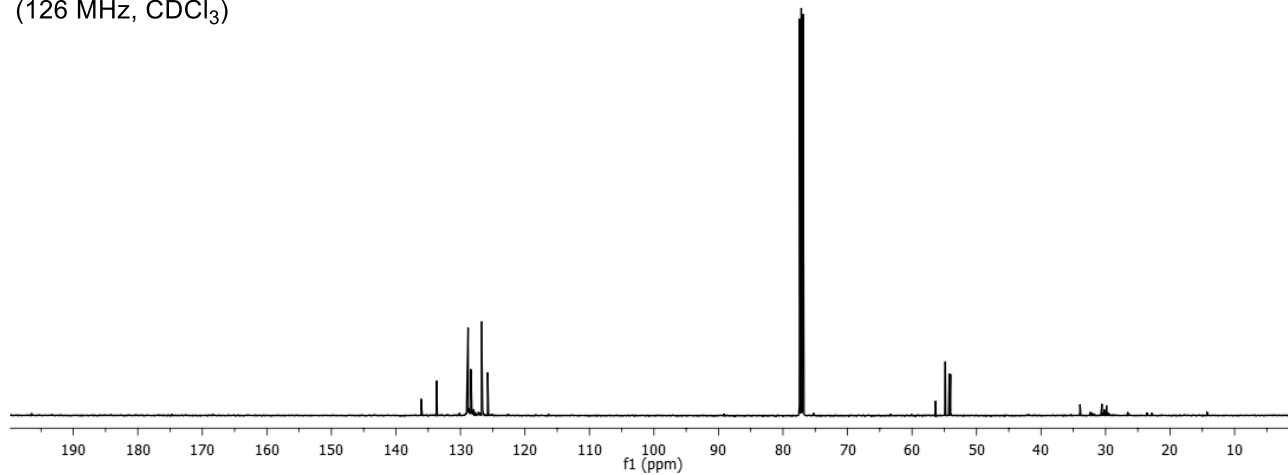

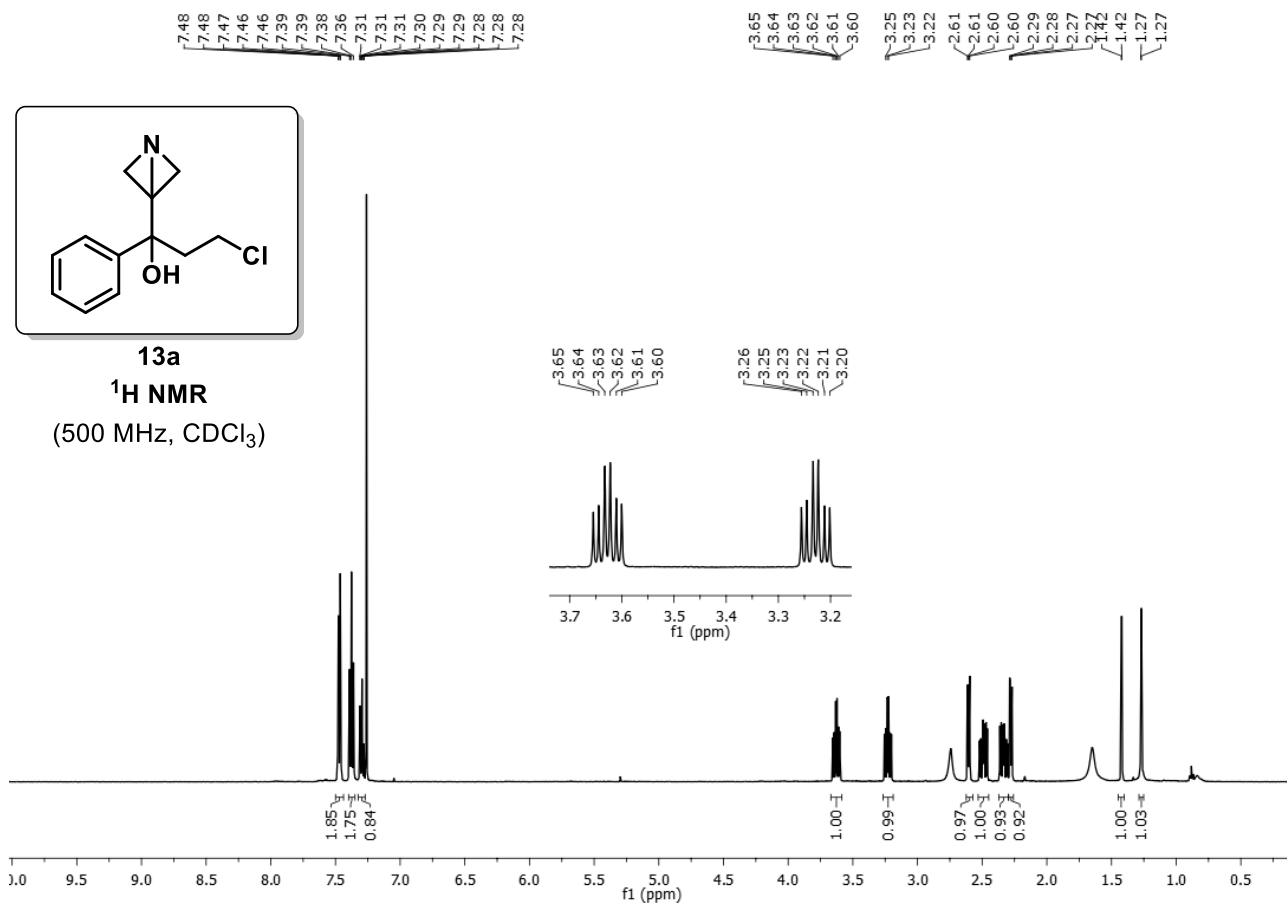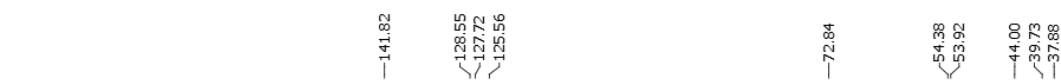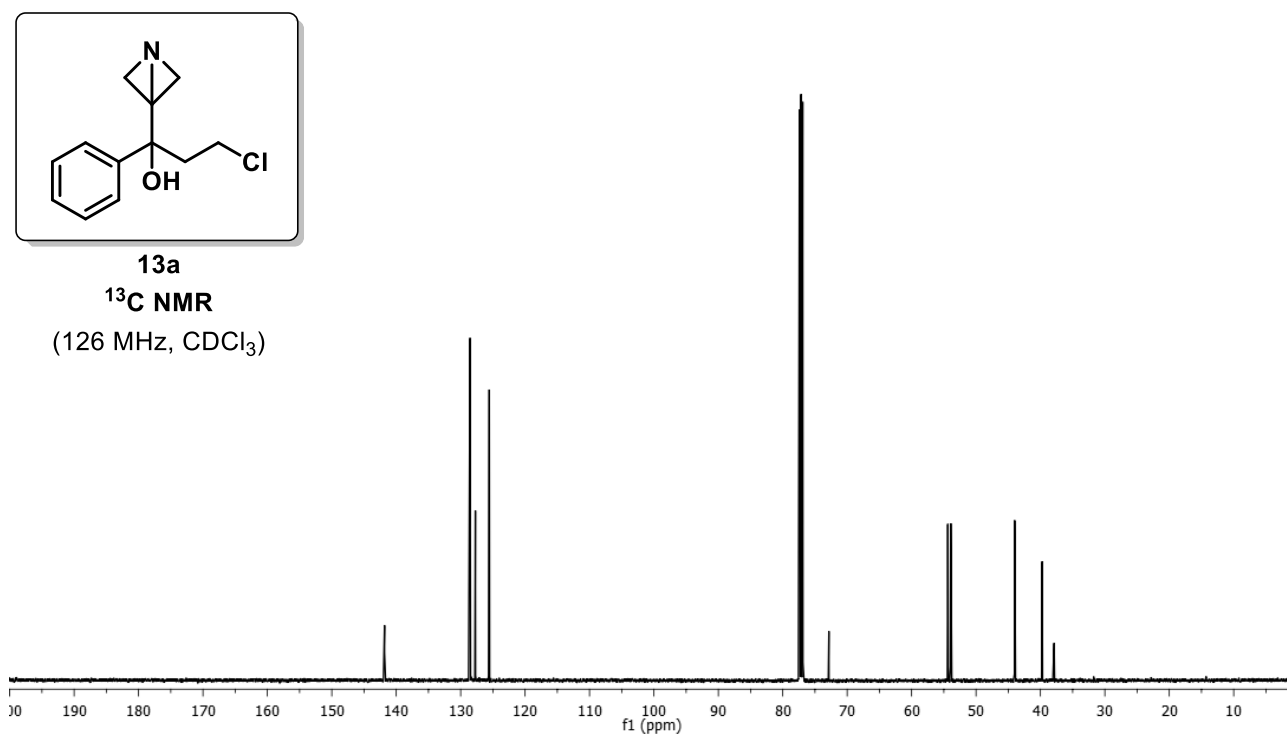

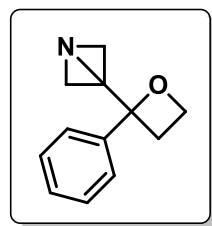

**6a**

**<sup>1</sup>H NMR**

(500 MHz, CDCl<sub>3</sub>)

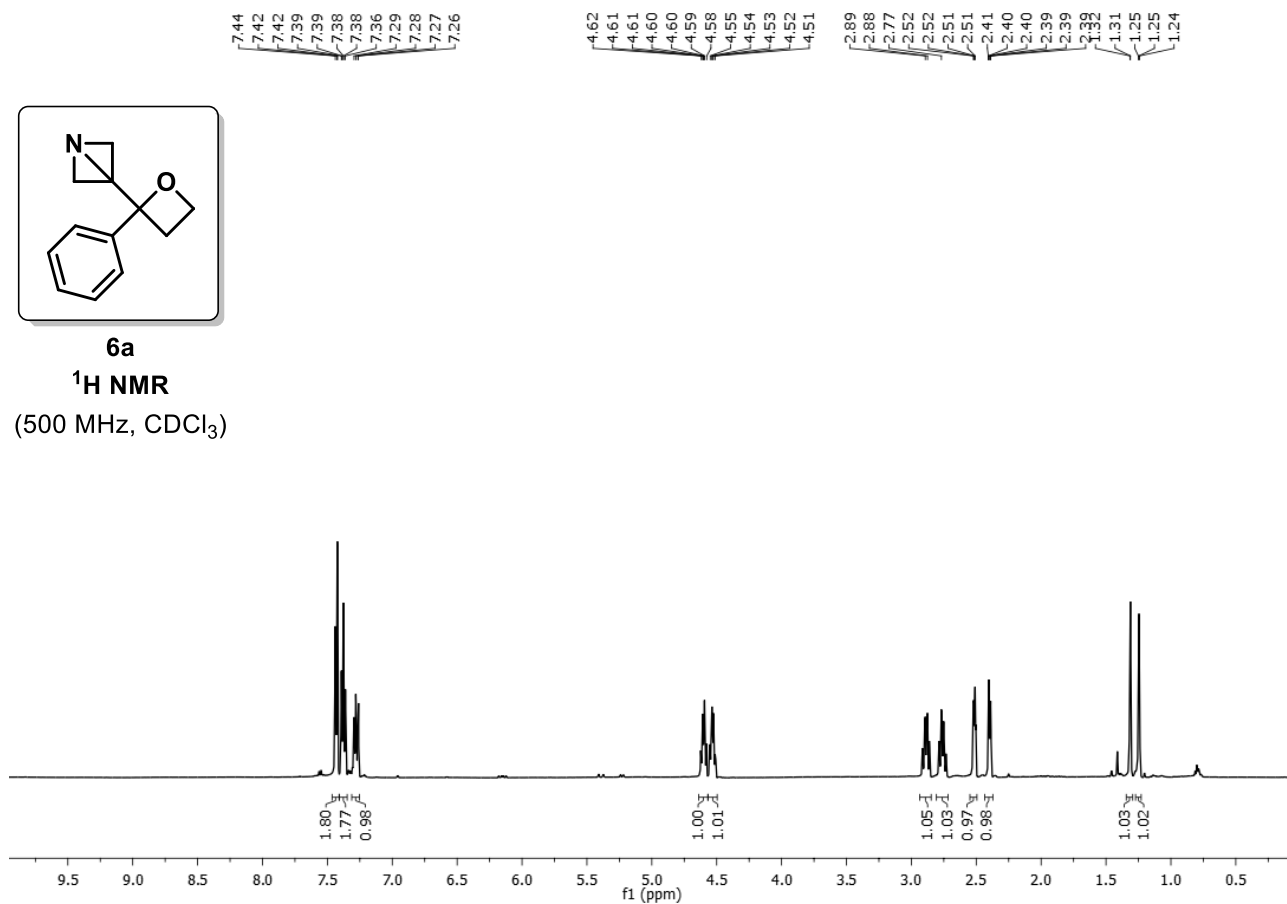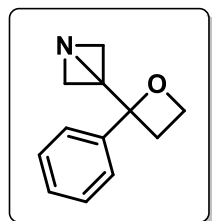

**6a**

**<sup>13</sup>C NMR**

(126 MHz, CDCl<sub>3</sub>)

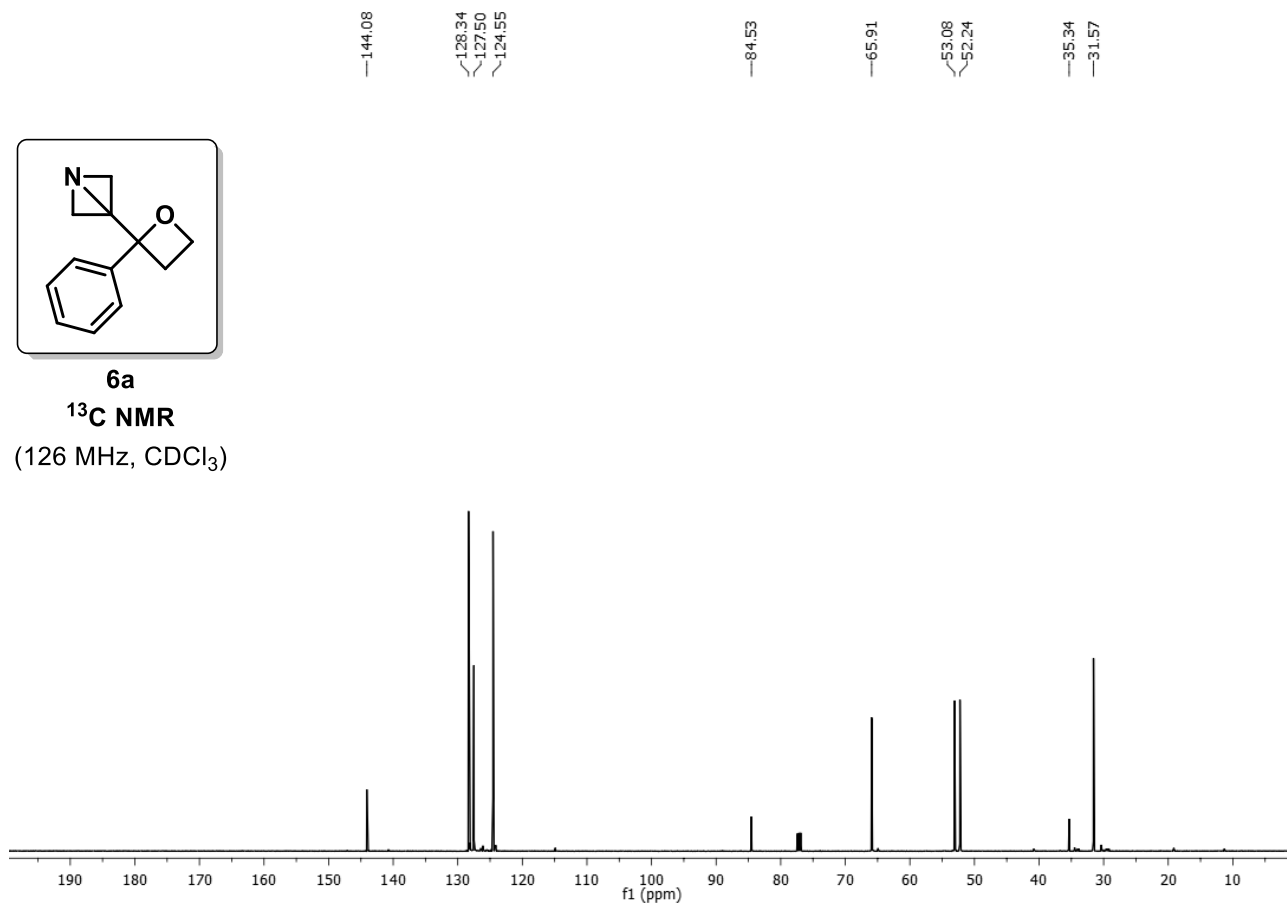



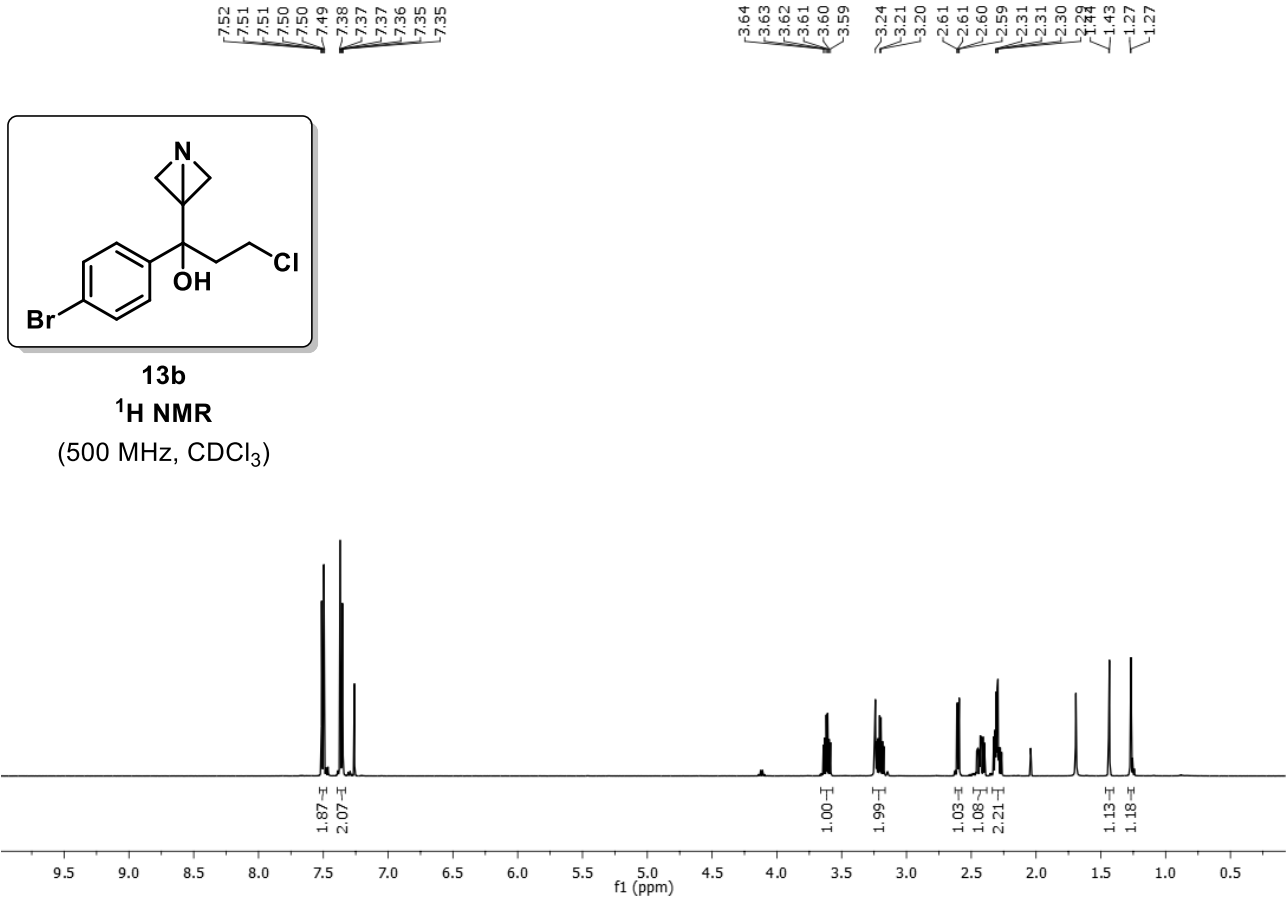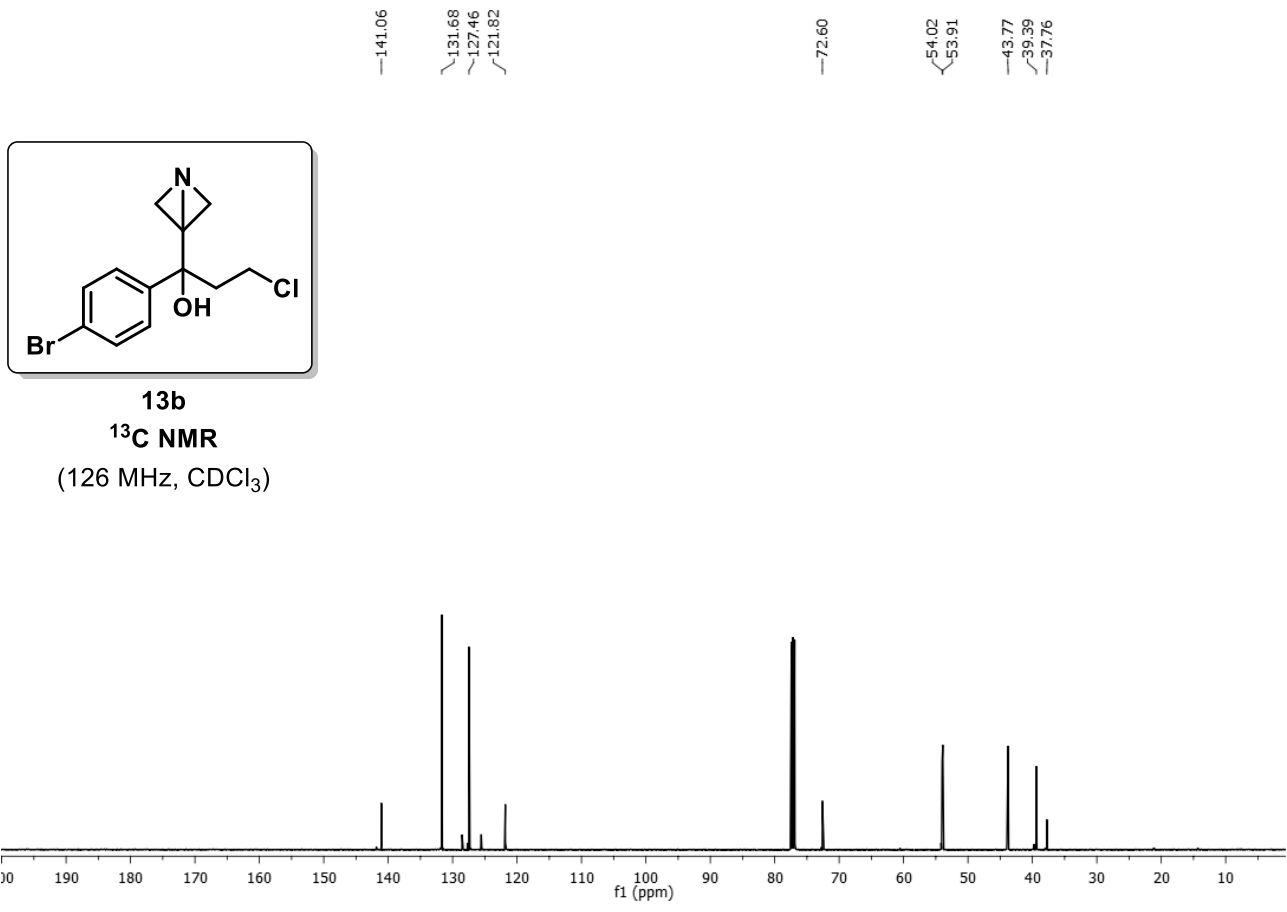

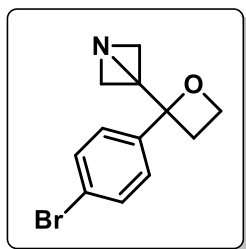

**6b**

**<sup>1</sup>H NMR**  
(500 MHz, CDCl<sub>3</sub>)

7.54  
7.54  
7.53  
7.51  
7.51  
7.50  
7.34  
7.33  
7.33  
7.31  
7.31  
7.30

4.65  
4.63  
4.63  
4.62  
4.61  
4.60  
4.60  
4.58  
4.58  
4.55  
4.55  
4.54  
4.53  
4.51

2.92  
2.90  
2.89  
2.75  
2.74  
2.72  
2.53  
2.52  
2.51  
2.50  
2.41  
2.40  
2.39  
1.38  
1.33  
1.28  
1.27

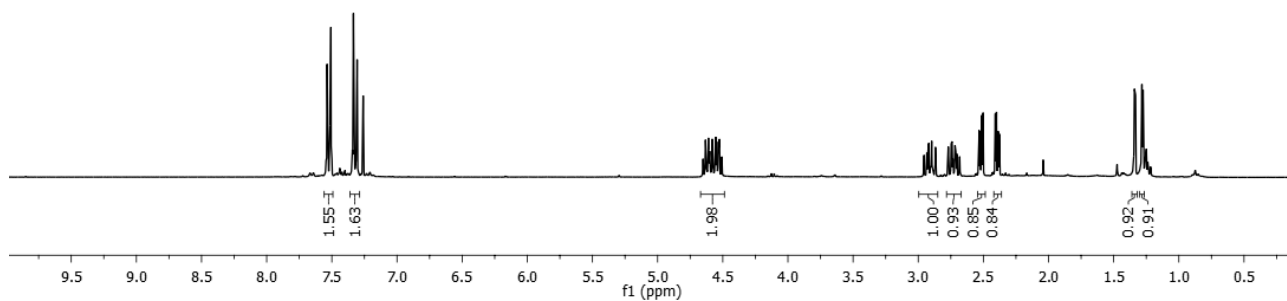

143.17  
131.60  
126.57  
121.66

84.40

66.04

53.22  
52.38

35.09  
31.67

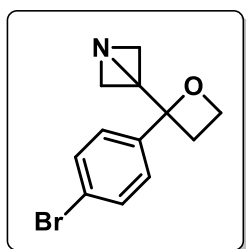

**6b**

**<sup>13</sup>C NMR**  
(126 MHz, CDCl<sub>3</sub>)

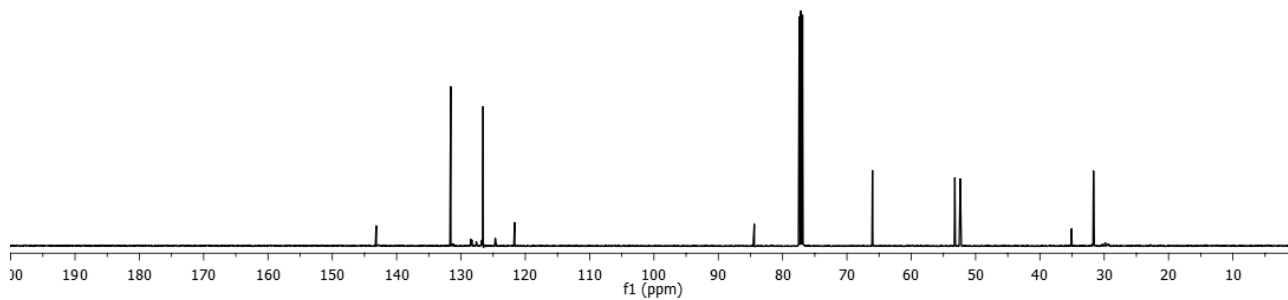

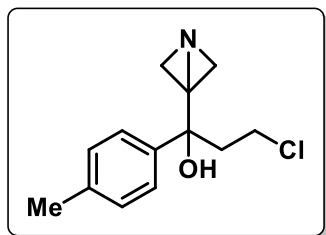

**13c**  
<sup>1</sup>H NMR  
 (500 MHz, CDCl<sub>3</sub>)

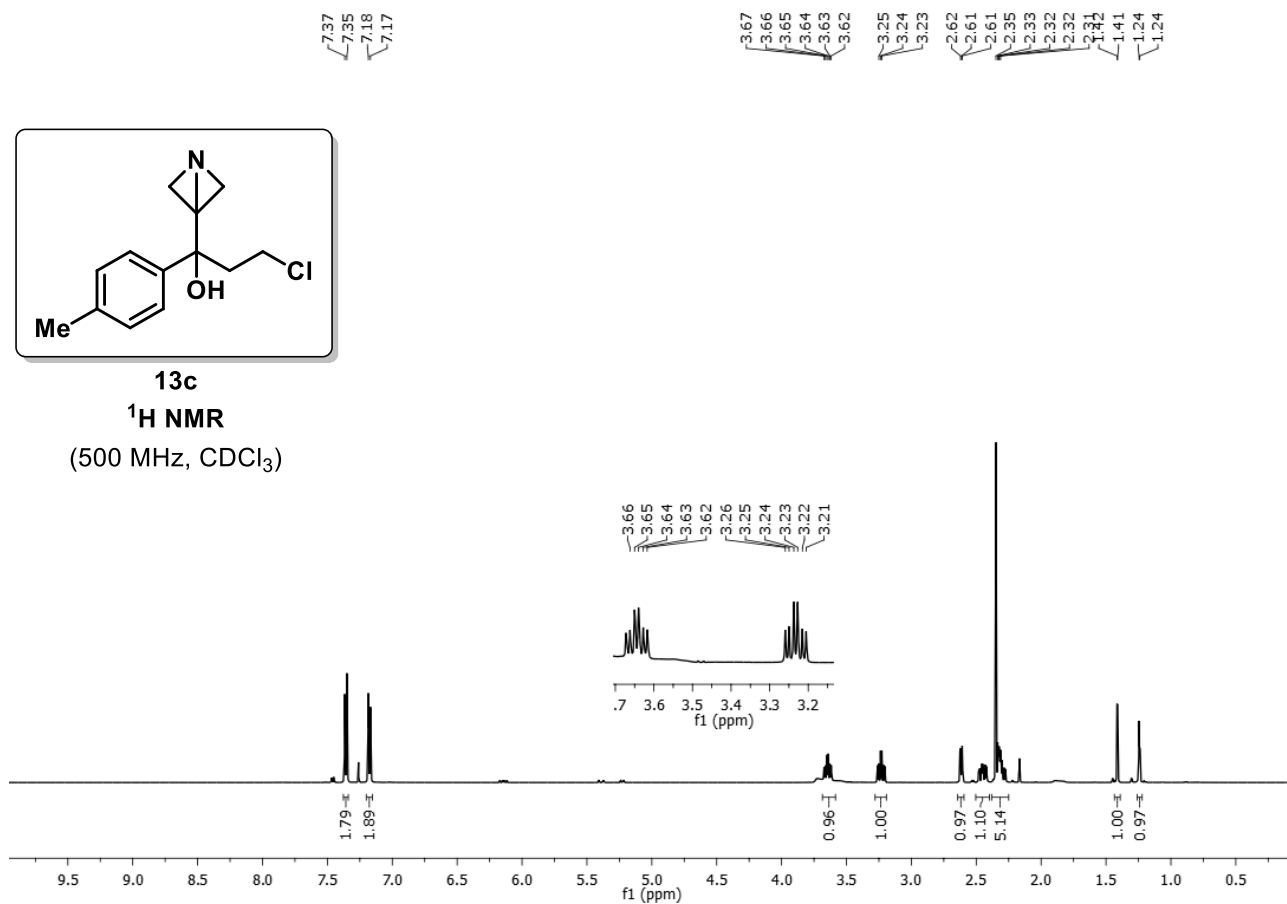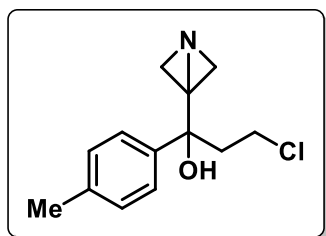

**13c**  
<sup>13</sup>C NMR  
 (126 MHz, CDCl<sub>3</sub>)

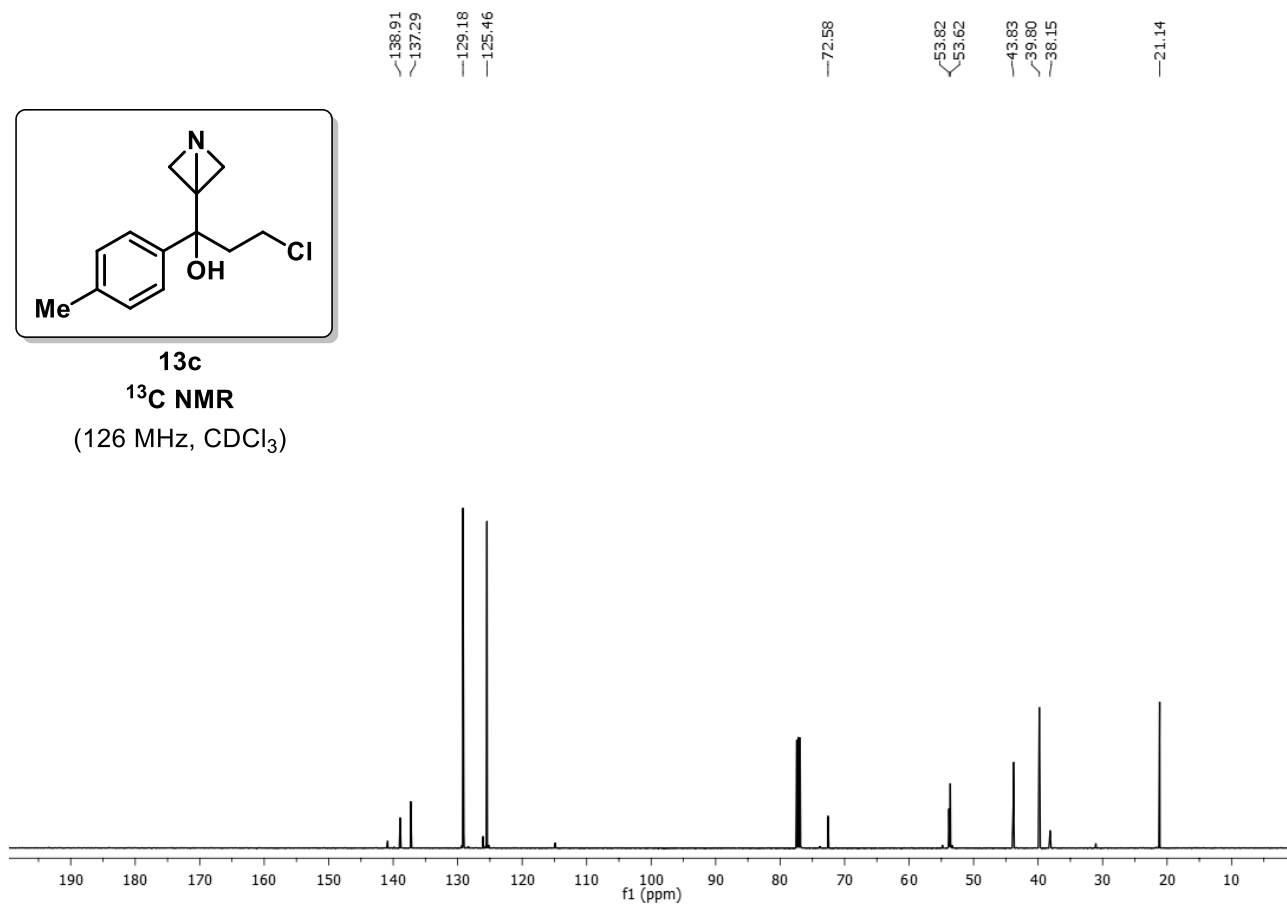

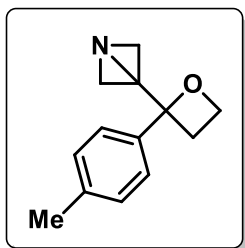

**6c**

**<sup>1</sup>H NMR**

(500 MHz, CDCl<sub>3</sub>)

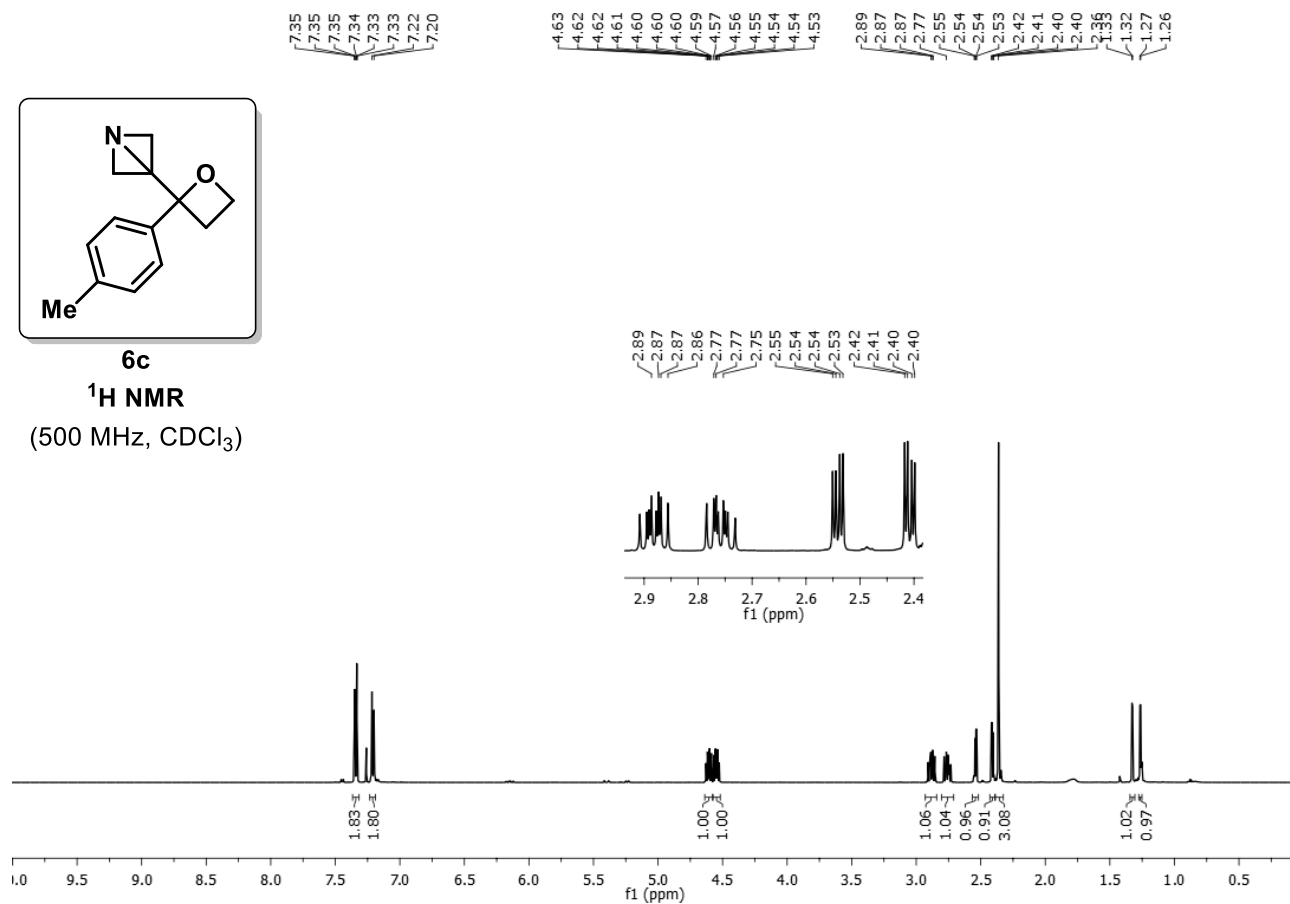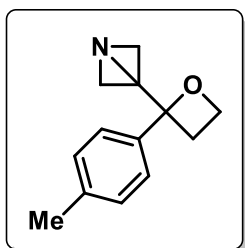

**6c**

**<sup>13</sup>C NMR**

(126 MHz, CDCl<sub>3</sub>)

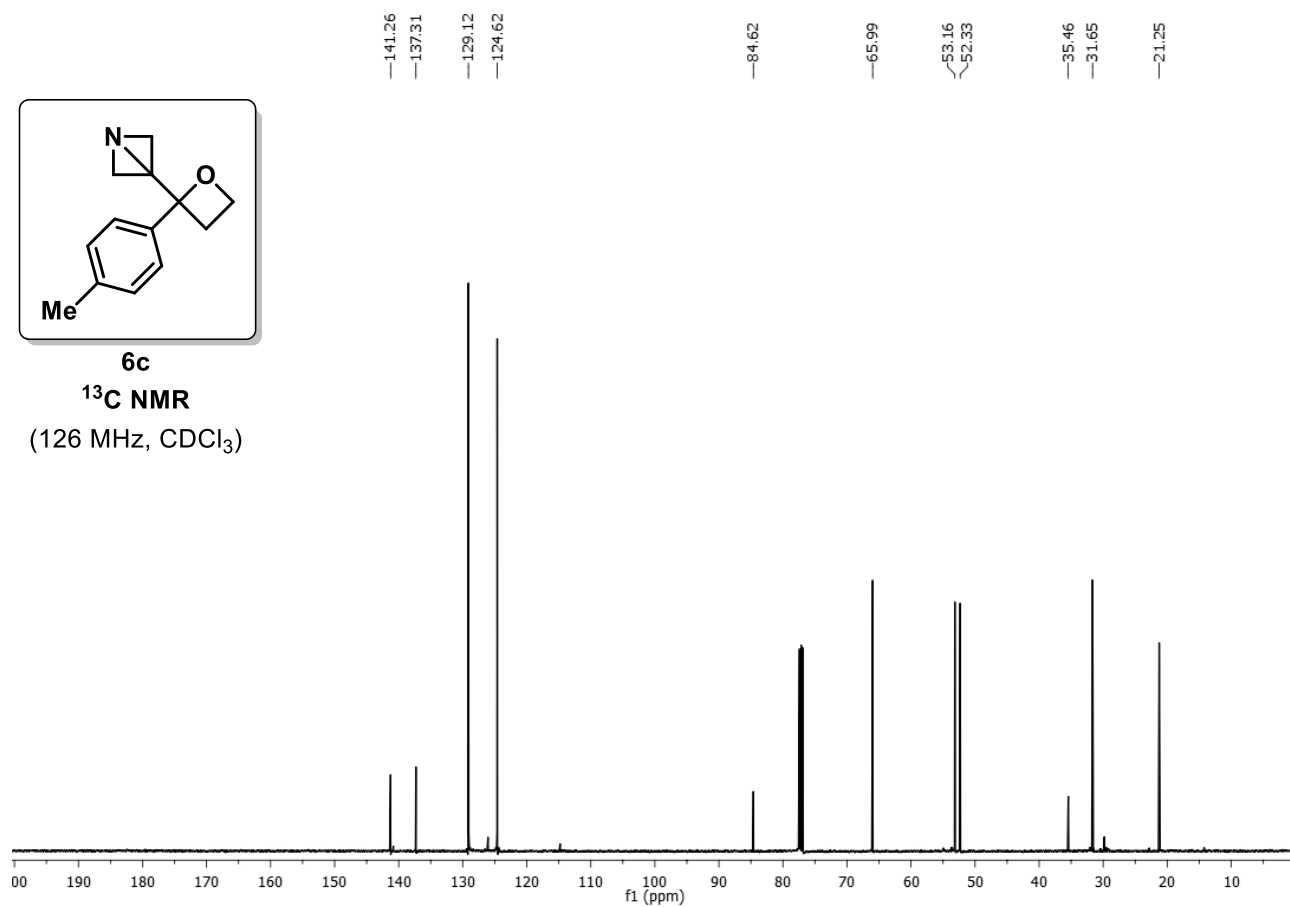

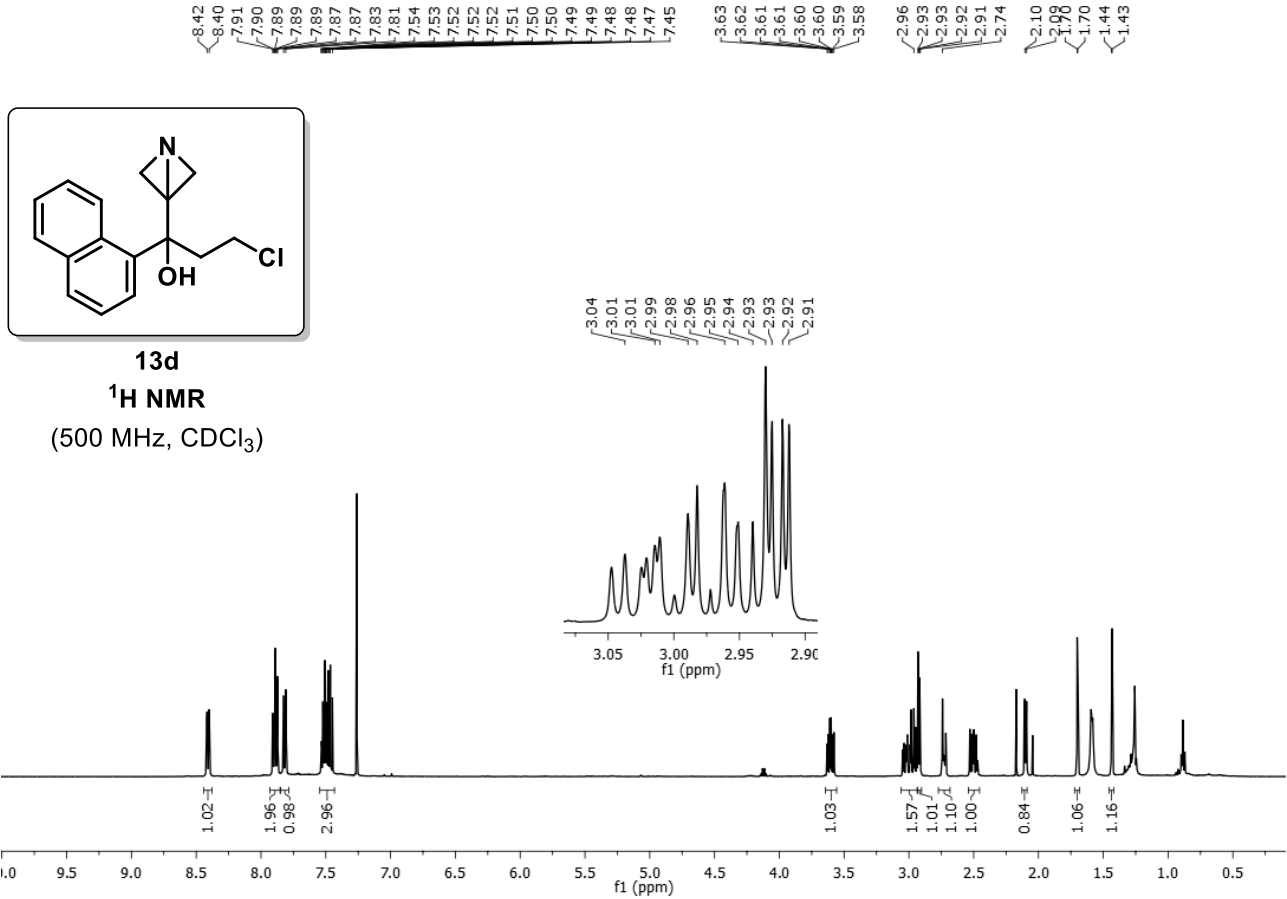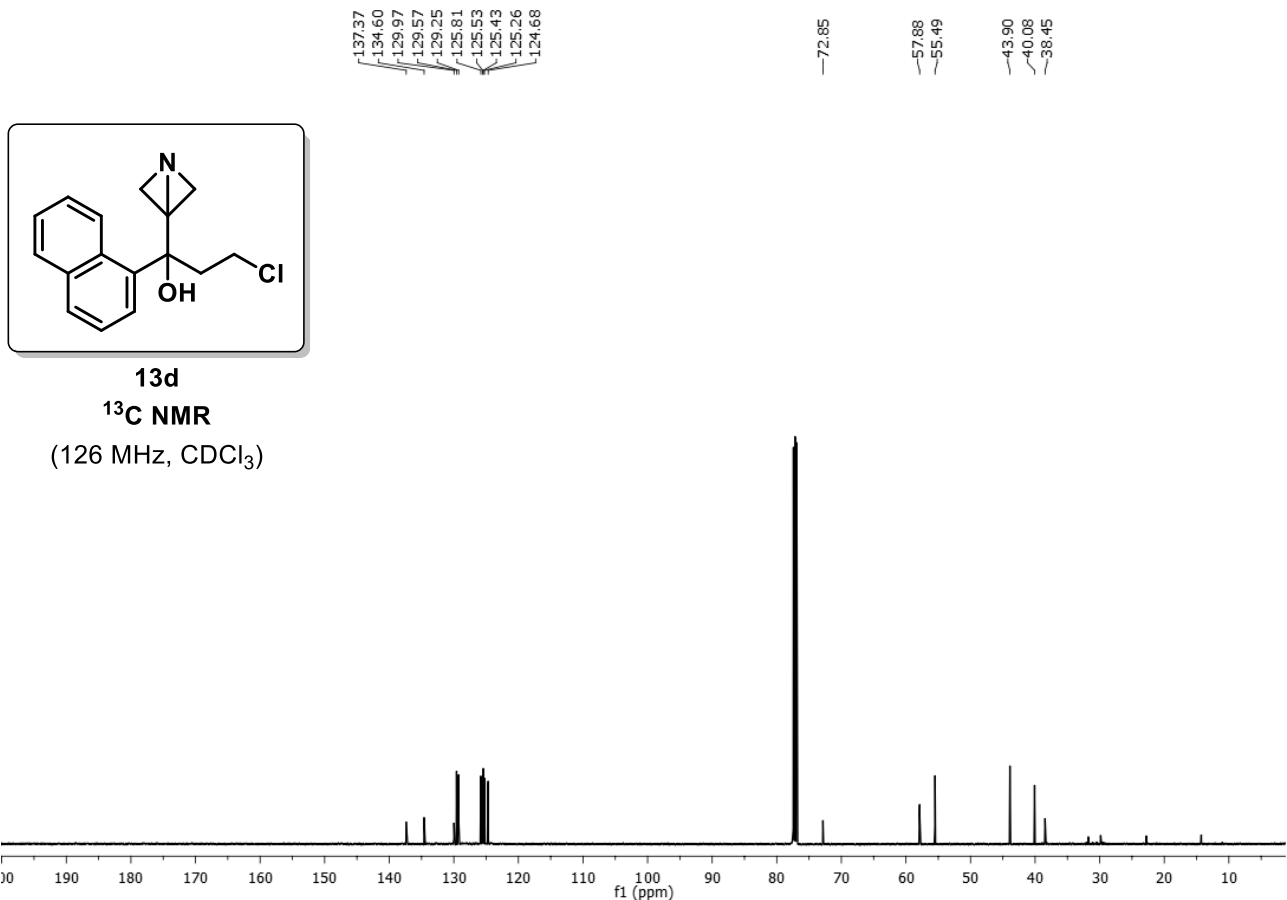

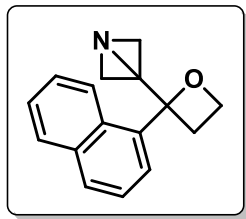

**6d**

**<sup>1</sup>H NMR**  
(500 MHz, CDCl<sub>3</sub>)

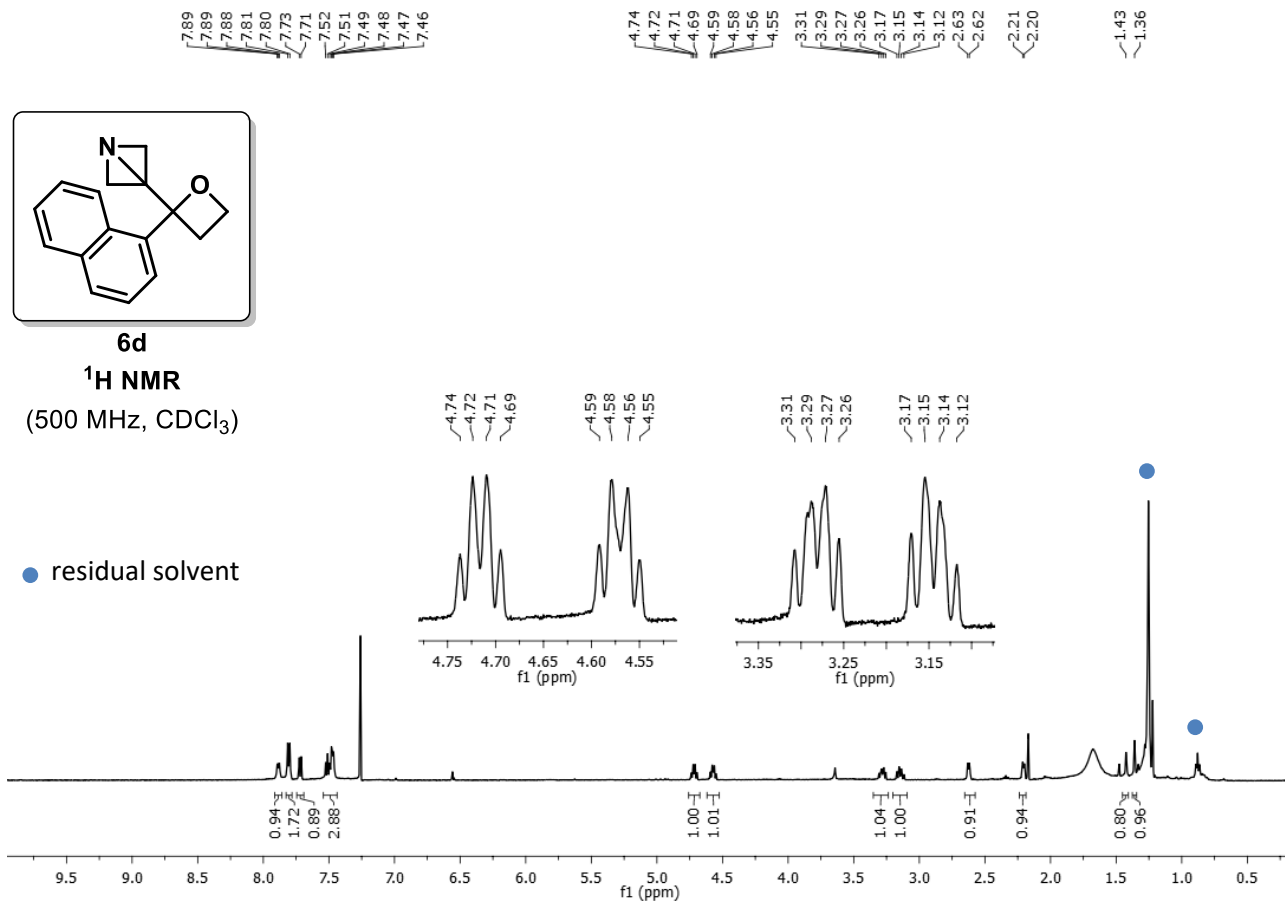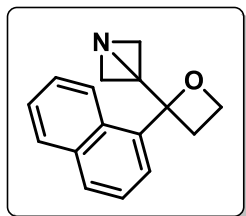

**6d**

**<sup>13</sup>C NMR**  
(126 MHz, CDCl<sub>3</sub>)

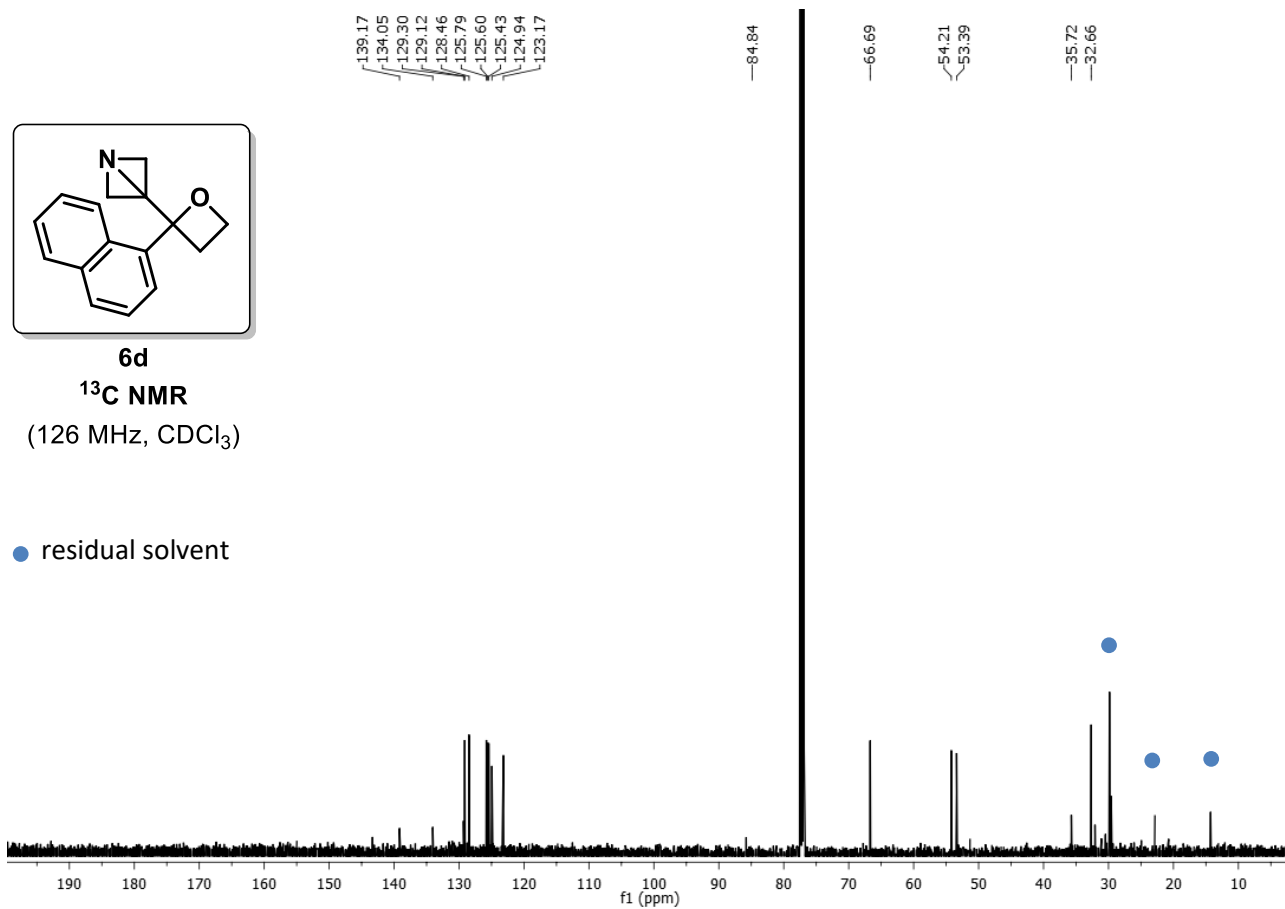

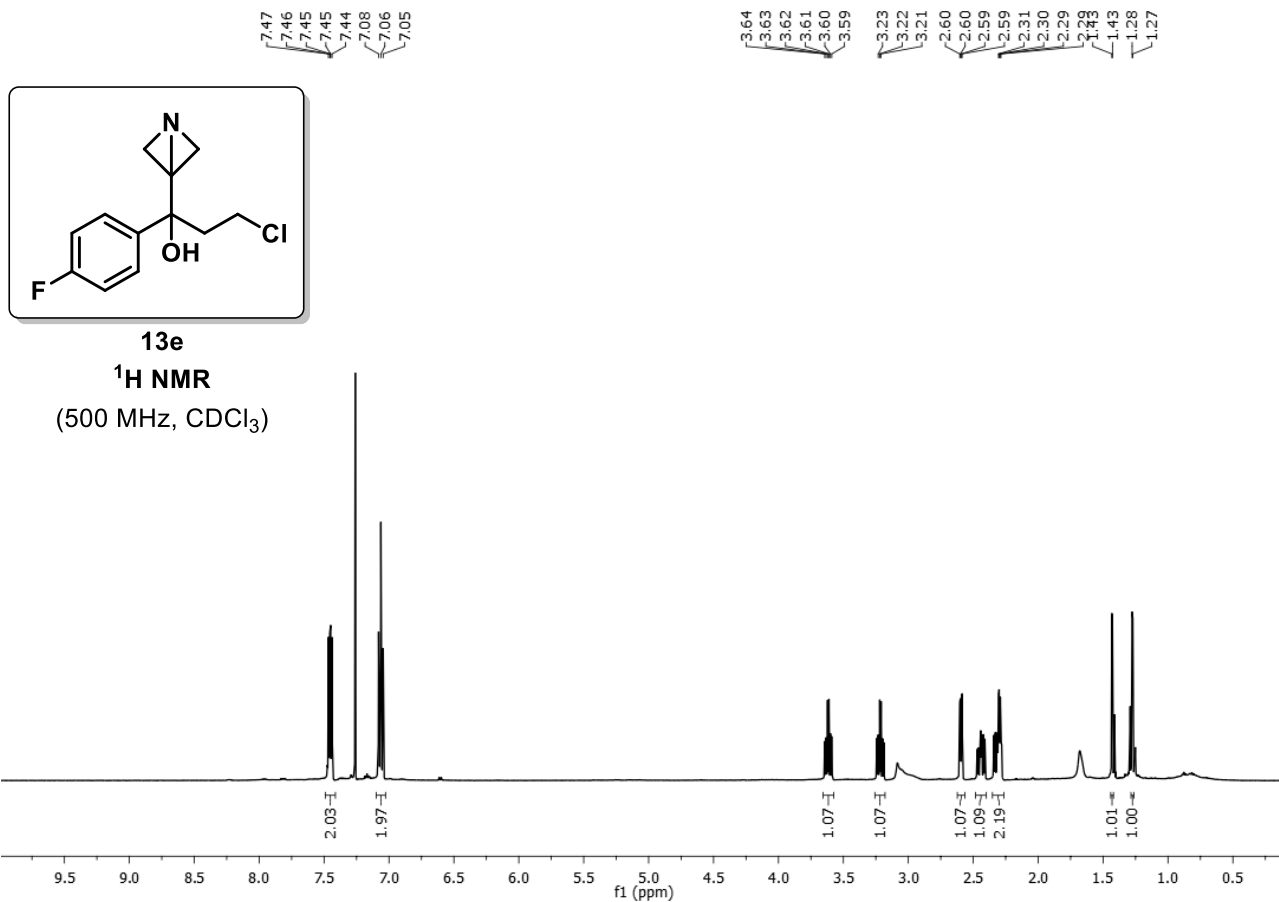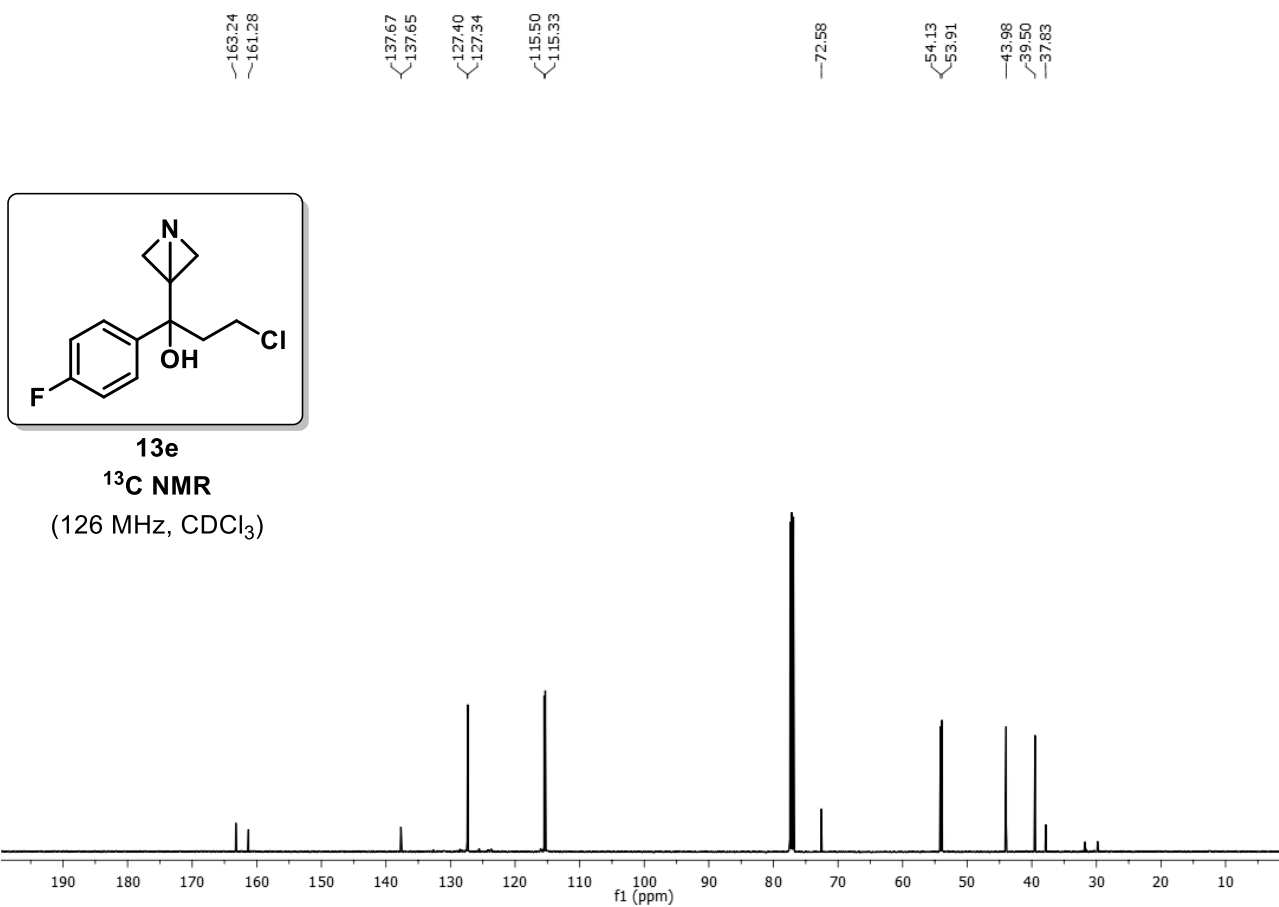

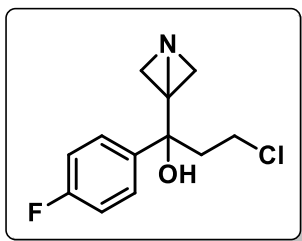

**13e**

**$^{19}\text{F}$  NMR**

(282 MHz,  $\text{CDCl}_3$ )

115.00  
115.02  
115.03  
115.04  
115.05  
115.07  
115.08  
115.10

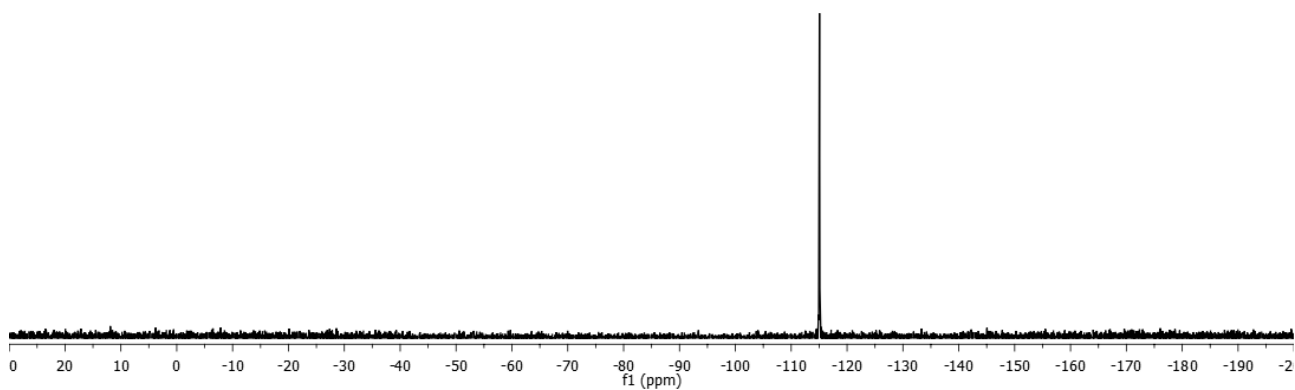

7.43  
7.43  
7.42  
7.42  
7.41  
7.41  
7.40  
7.09  
7.08  
7.07  
7.07  
7.06  
7.05  
4.64  
4.63  
4.62  
4.62  
4.61  
4.61  
4.61  
4.59  
4.57  
4.55  
4.55  
4.54  
4.54  
4.53  
4.52  
2.89  
2.89  
2.88  
2.77  
2.74  
2.73  
2.52  
2.51  
2.50  
2.40  
2.40  
2.39  
1.38  
1.34  
1.28  
1.28

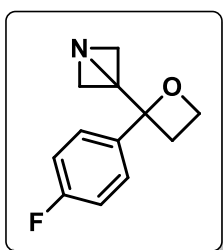

**6e**

**$^1\text{H}$  NMR**

(500 MHz,  $\text{CDCl}_3$ )

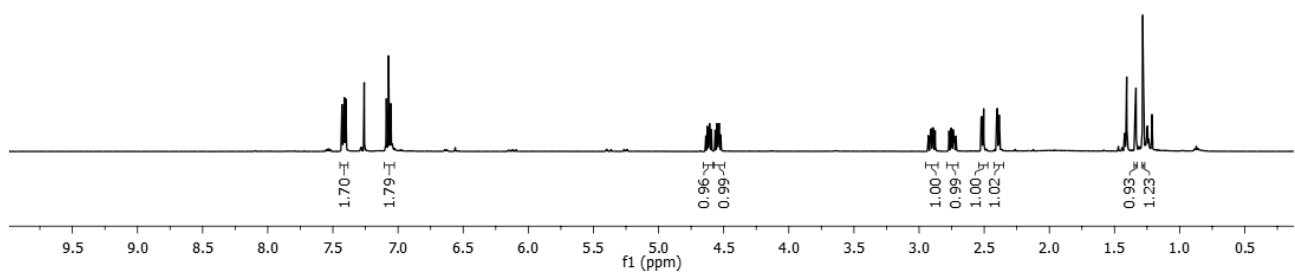



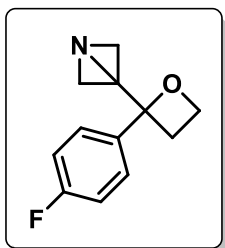

**6e**

**<sup>13</sup>C NMR**

(126 MHz, CDCl<sub>3</sub>)

<sup>13</sup>C NMR chemical shifts (ppm):  
 163.23, 161.27, 139.91, 139.89, 126.57, 126.51, 115.40, 115.23, 84.40, 65.97, 53.21, 52.35, 35.27, 31.73

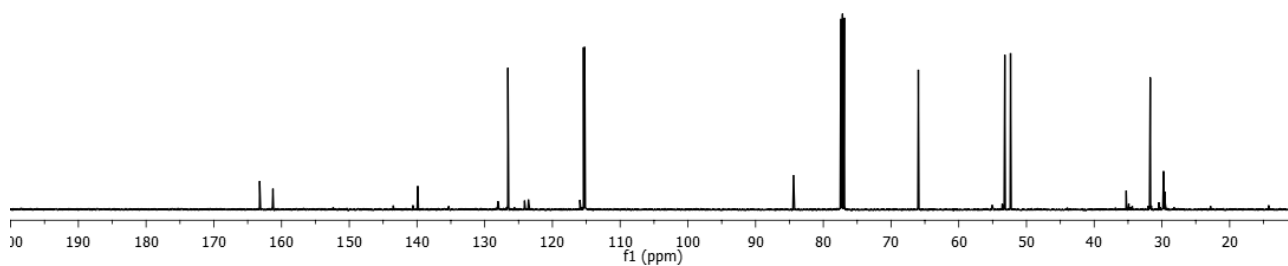

<sup>19</sup>F NMR chemical shifts (ppm):  
 -115.03, -115.04, -115.04, -115.05, -115.06, -115.06, -115.07, -115.07, -115.09

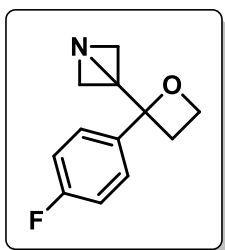

**6e**

**<sup>19</sup>F NMR**

(282 MHz, CDCl<sub>3</sub>)

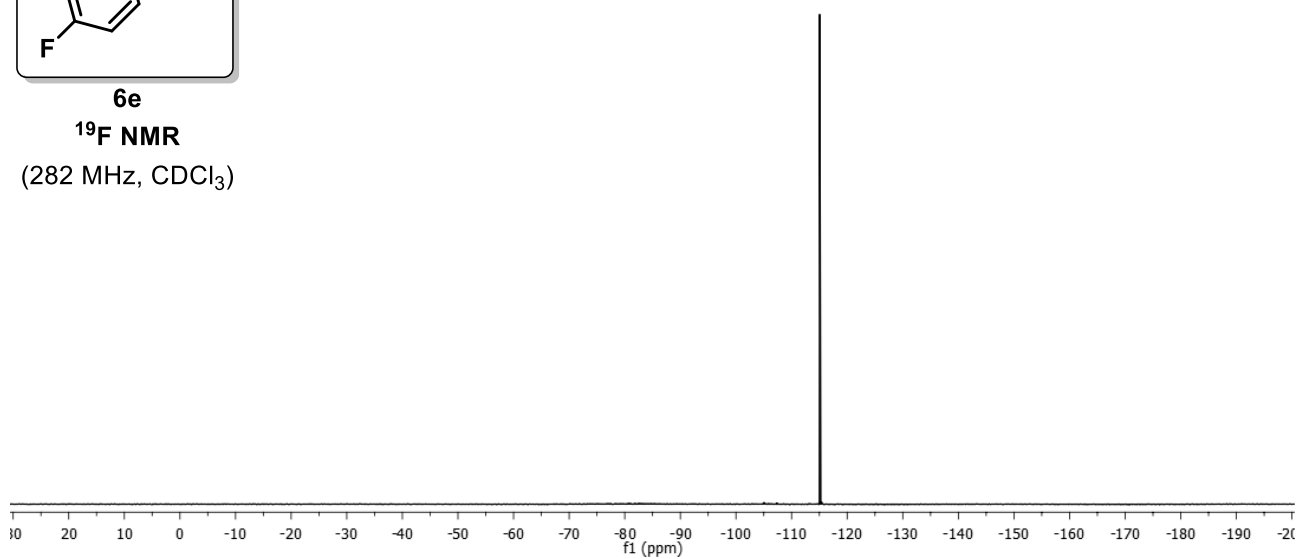

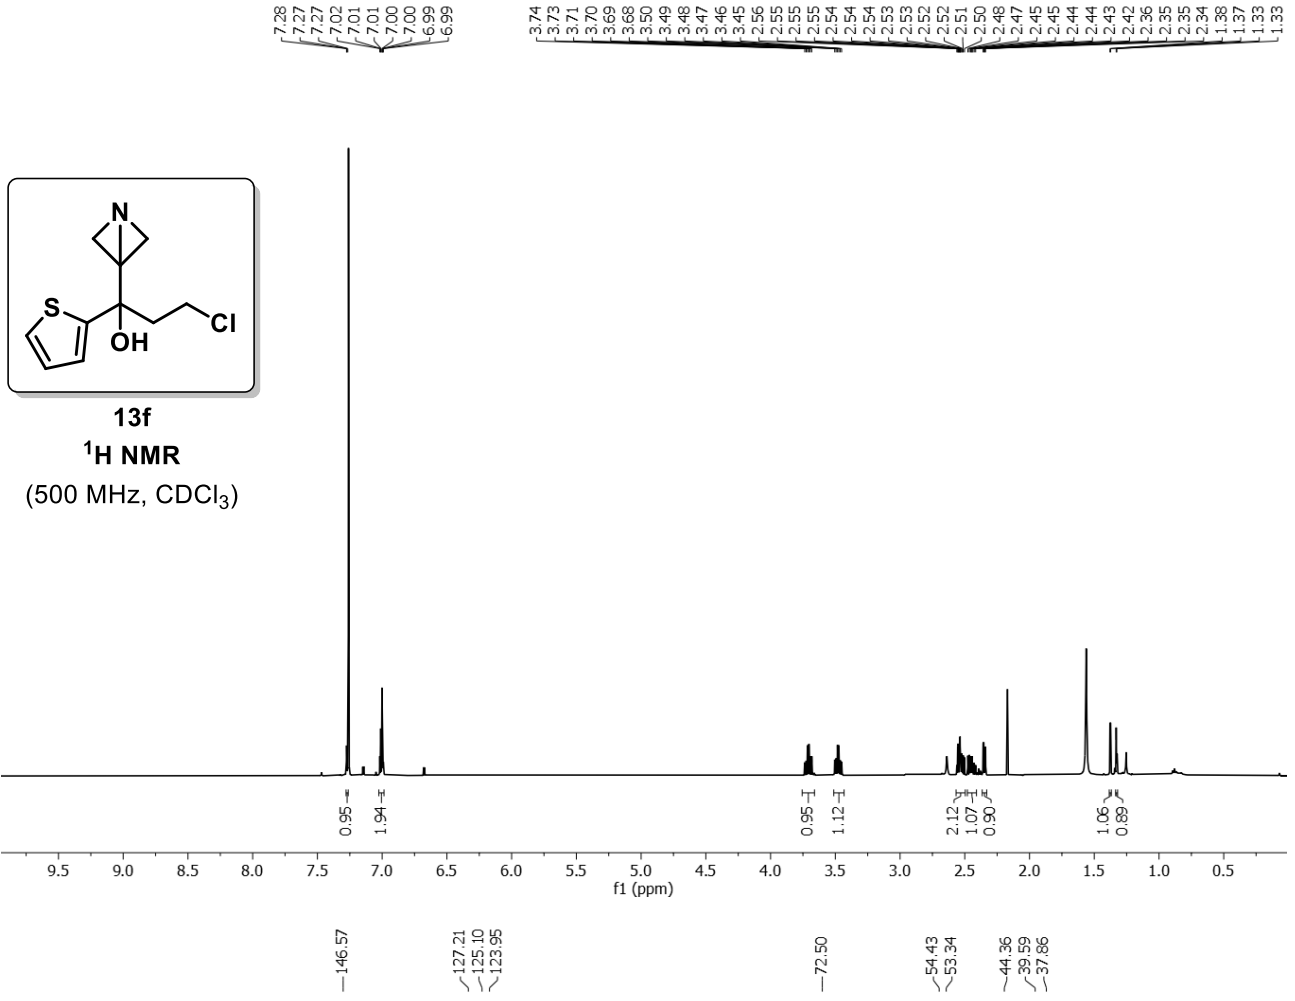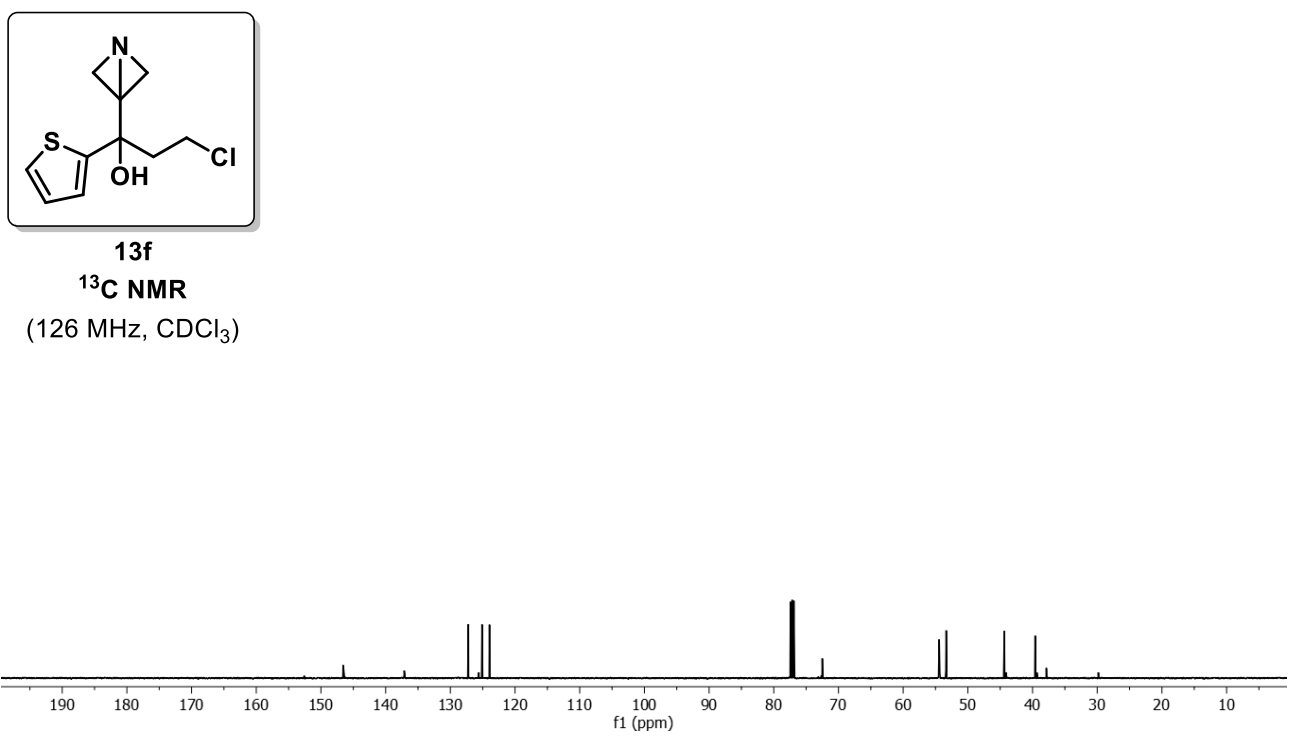

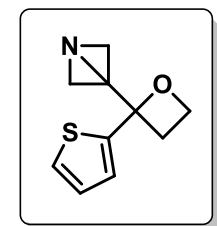

**6f**

**<sup>1</sup>H NMR**

(500 MHz, CDCl<sub>3</sub>)

● residual solvent

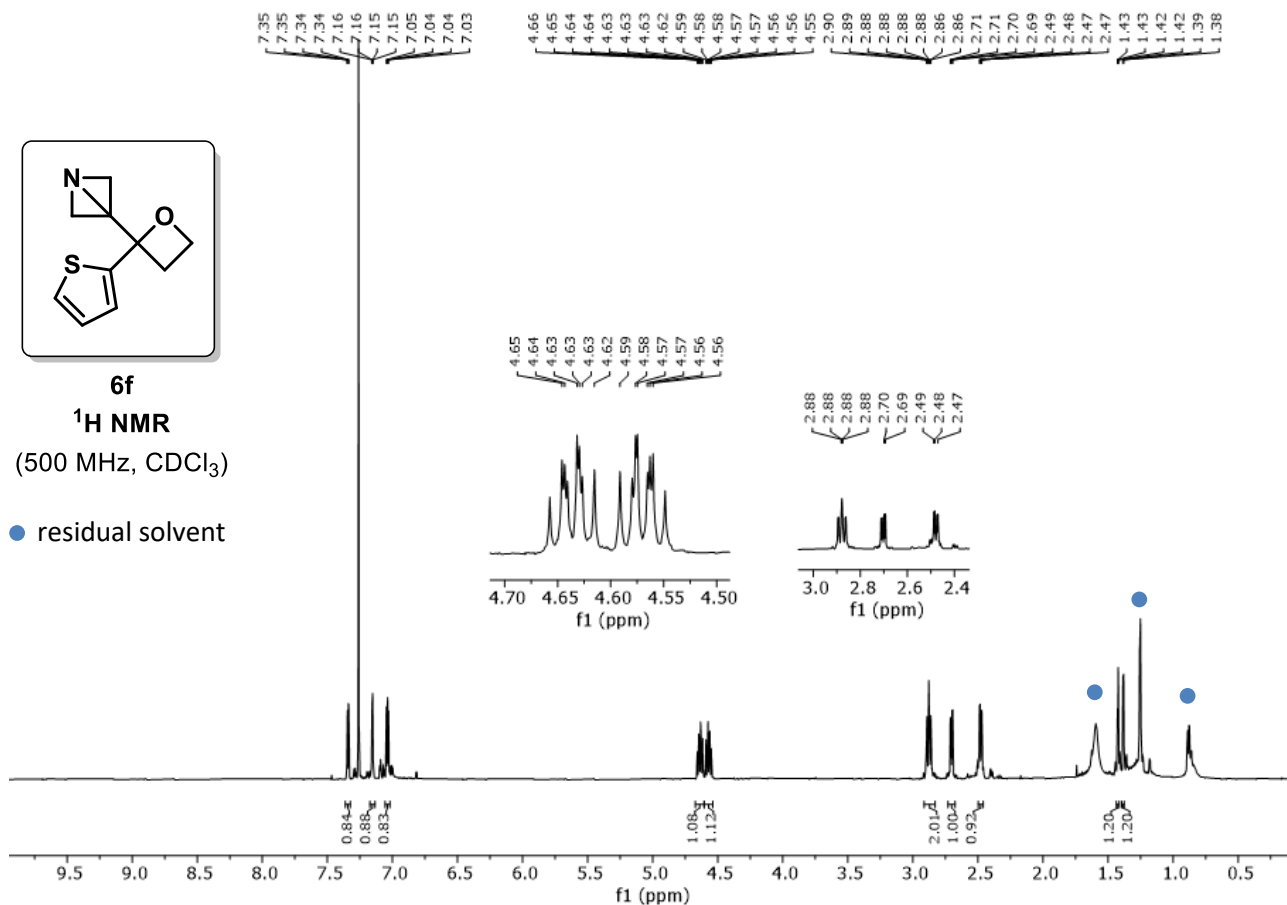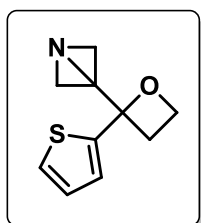

**6f**

**<sup>13</sup>C NMR**

(126 MHz, CDCl<sub>3</sub>)

● residual solvent

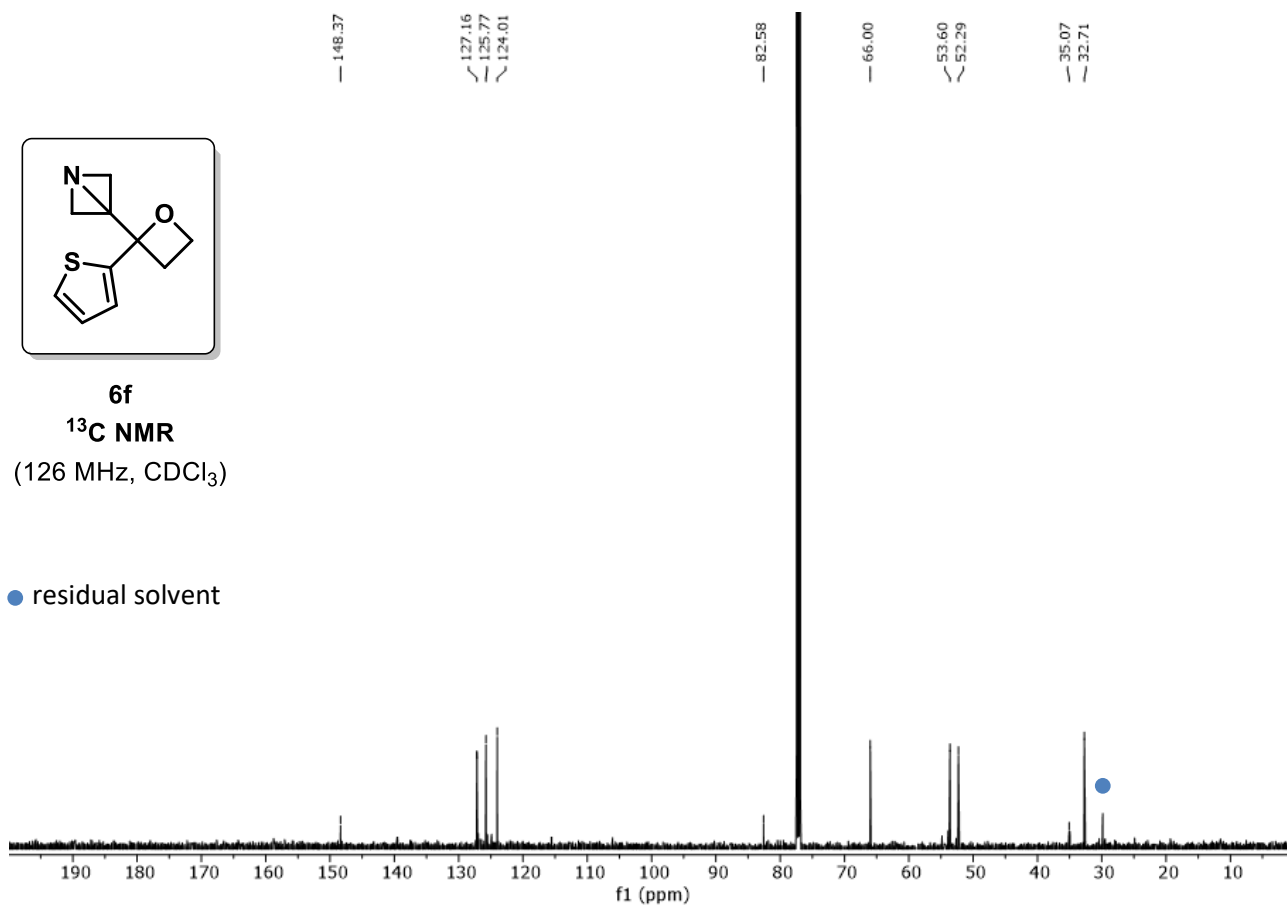

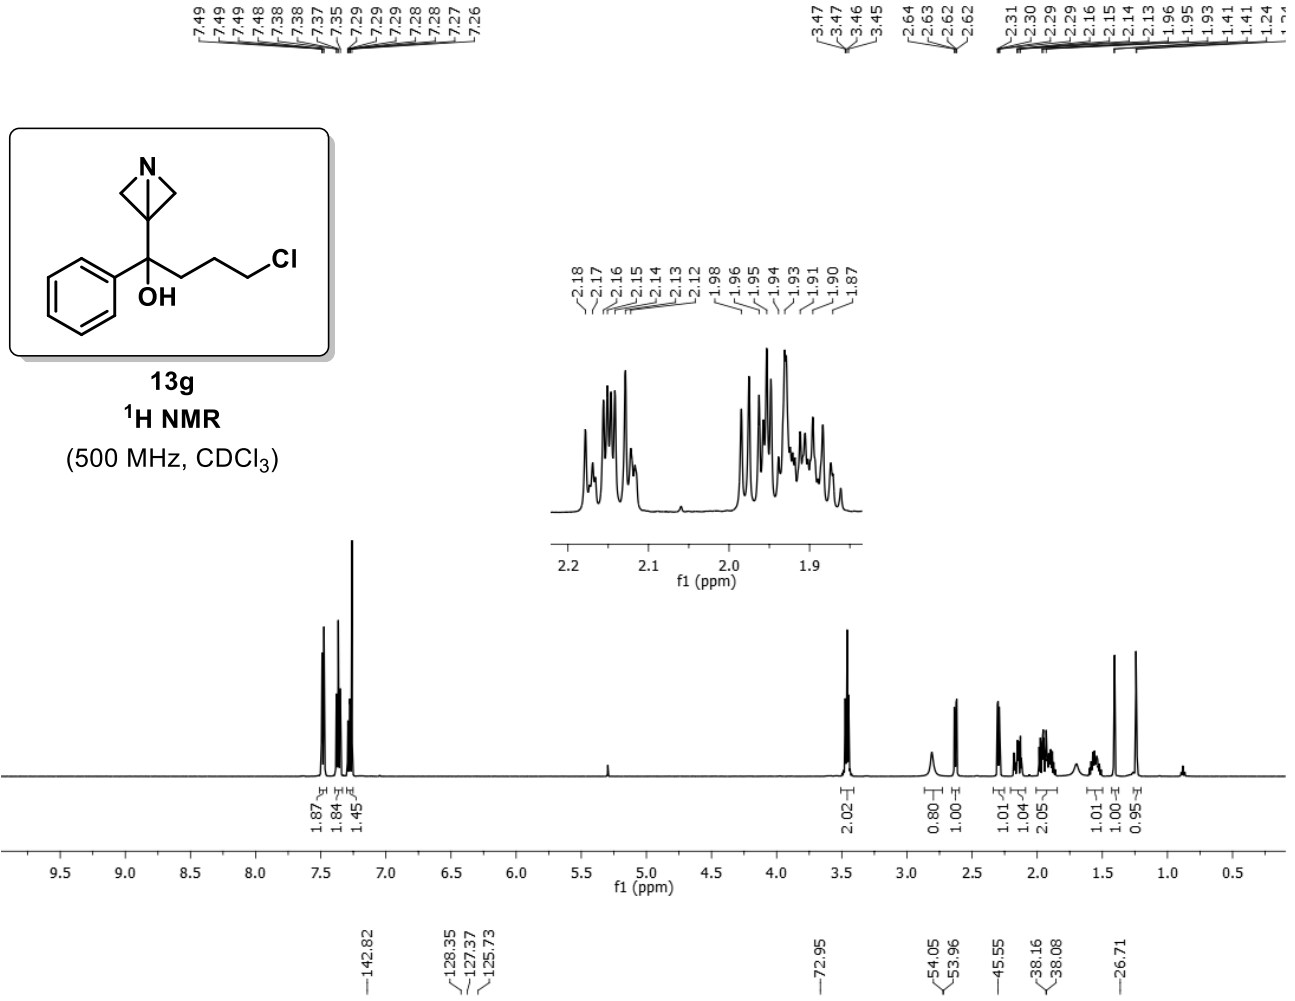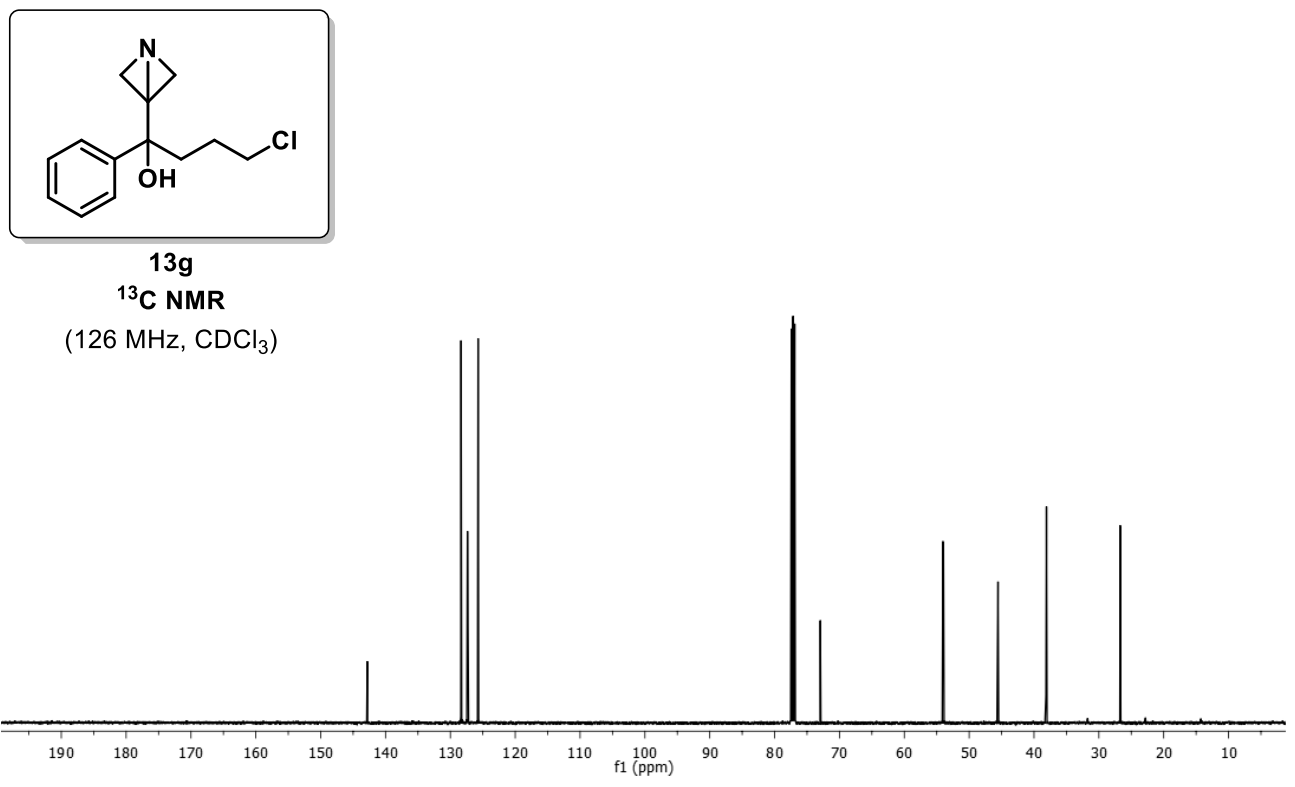

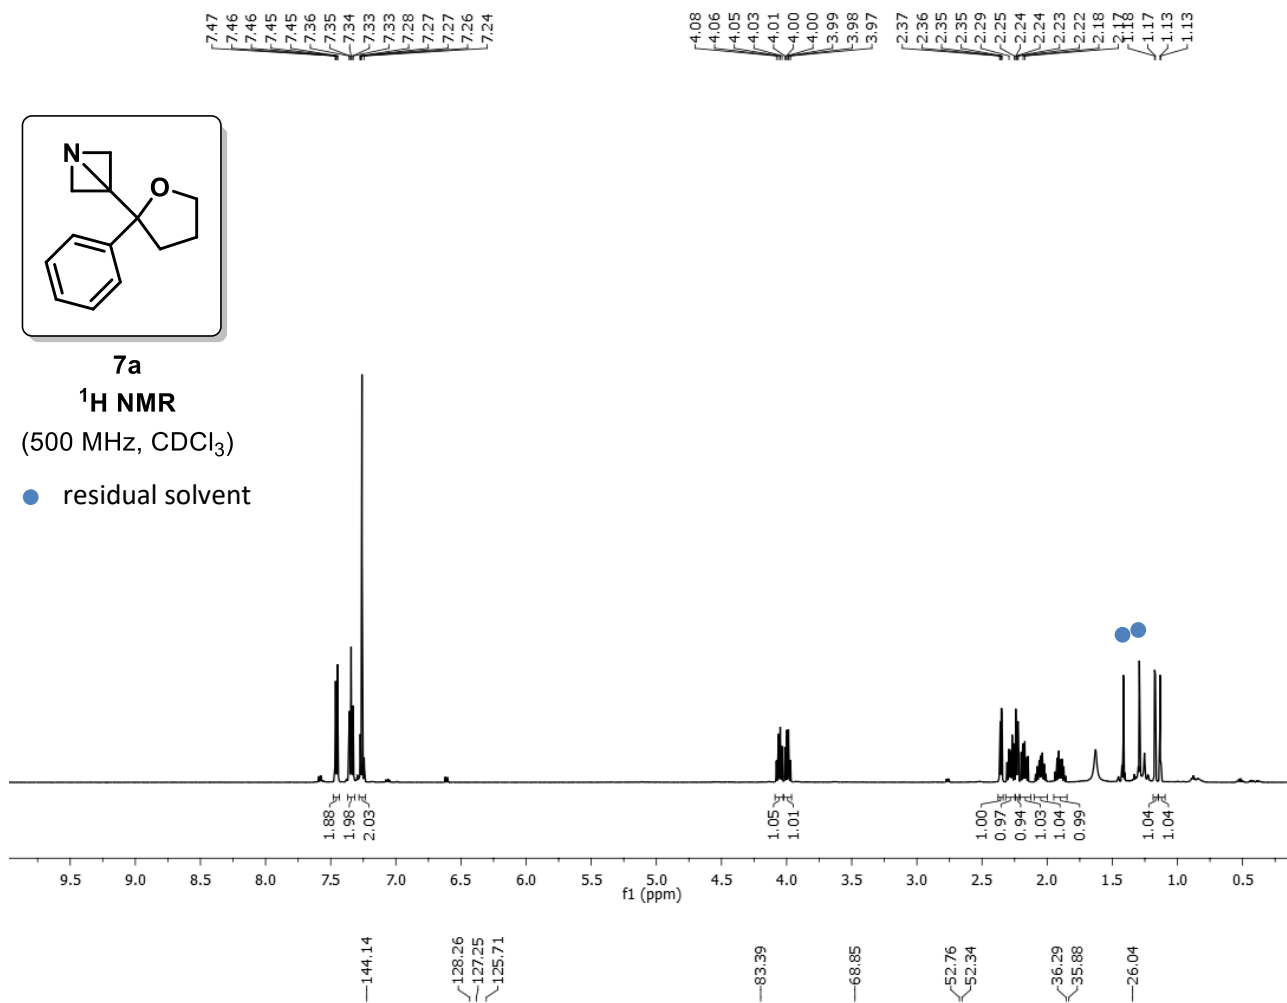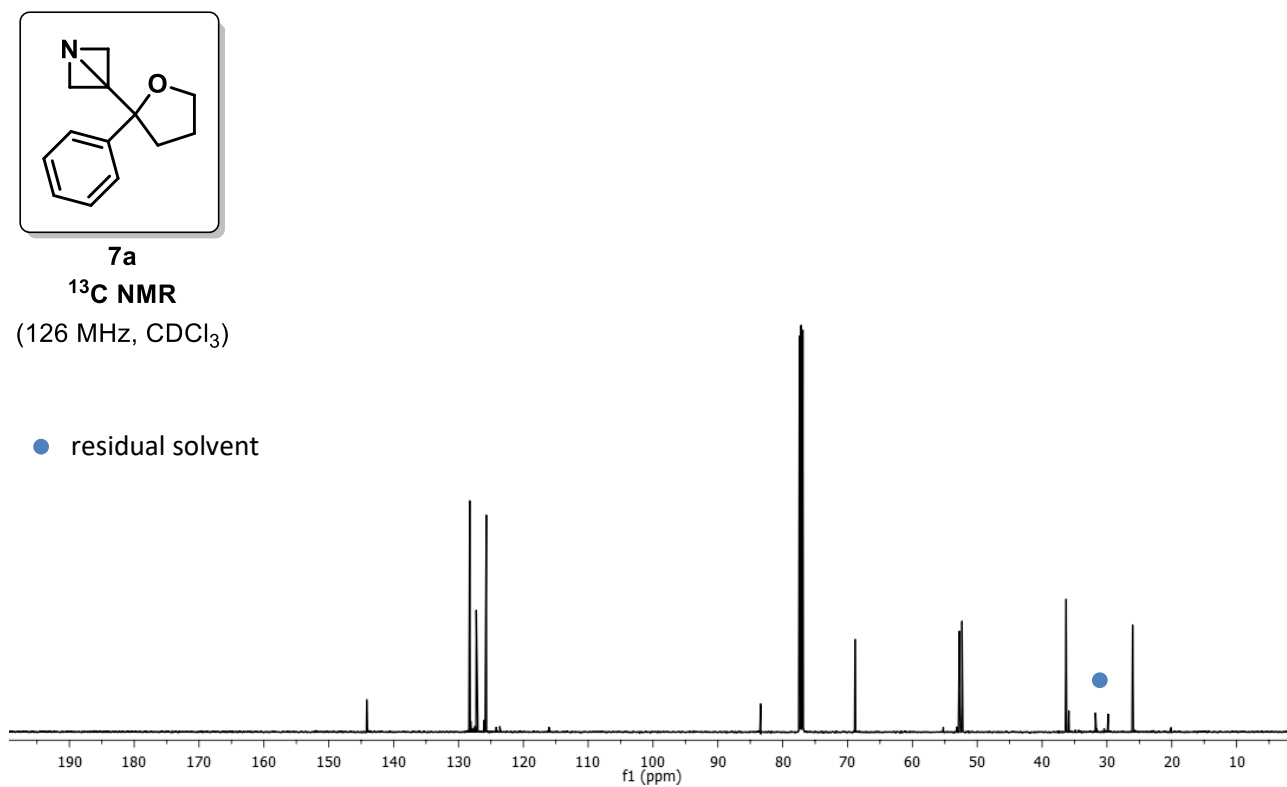

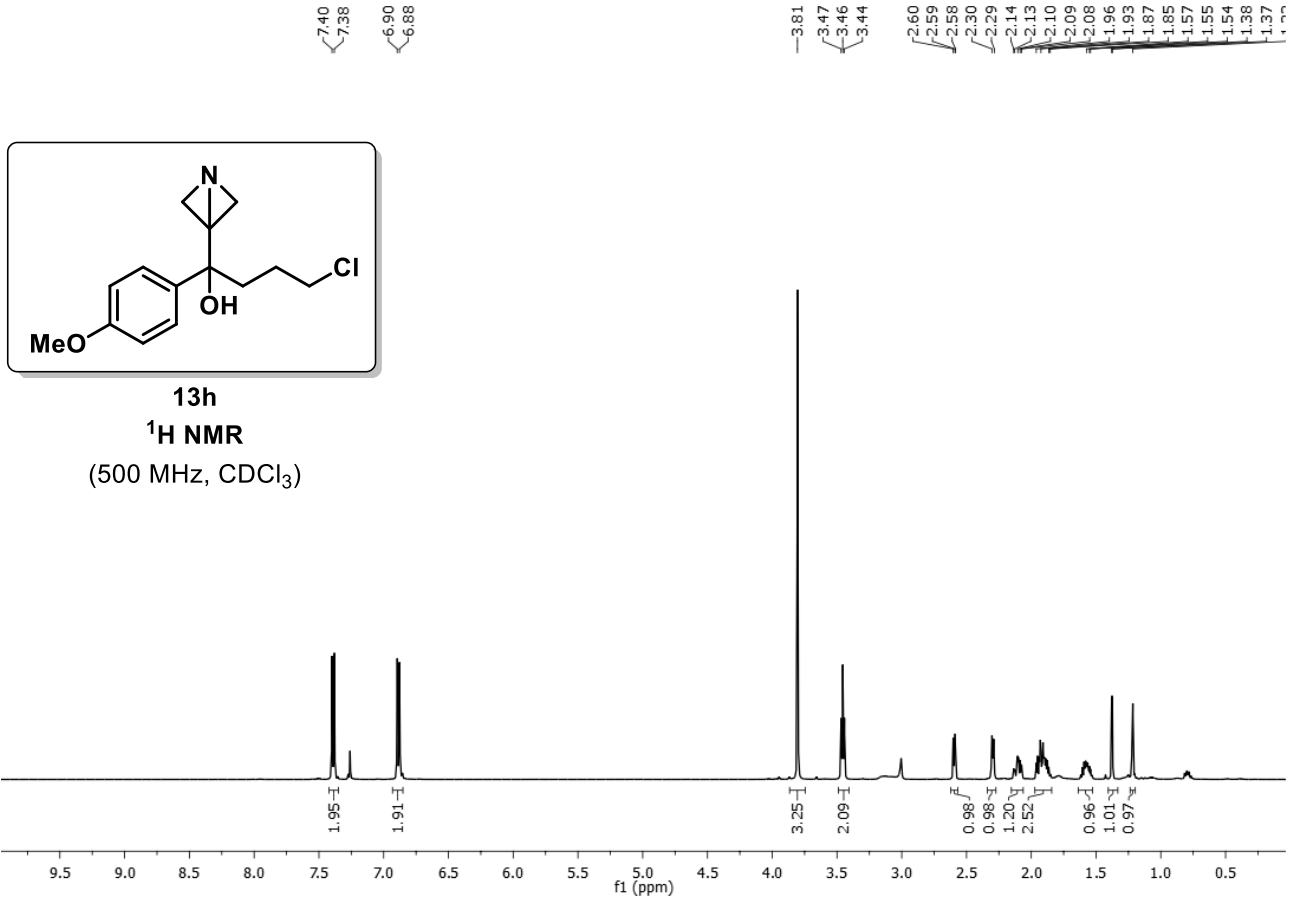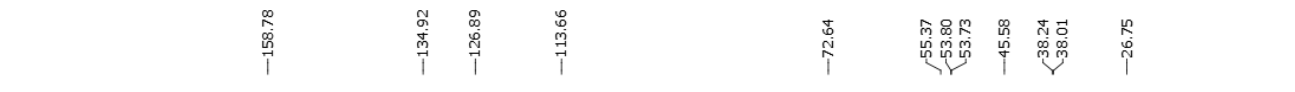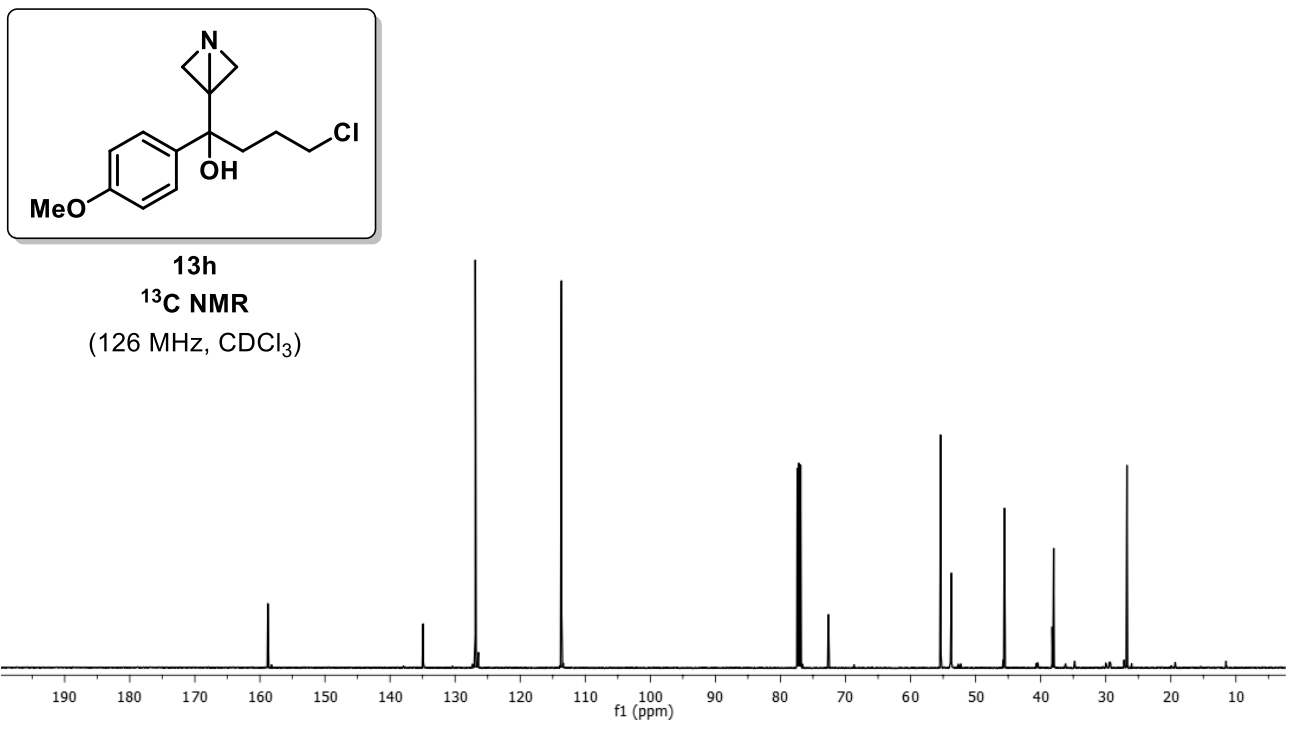

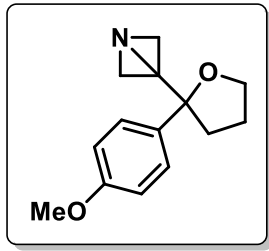

**7b**  
<sup>1</sup>H NMR  
 (500 MHz, CDCl<sub>3</sub>)

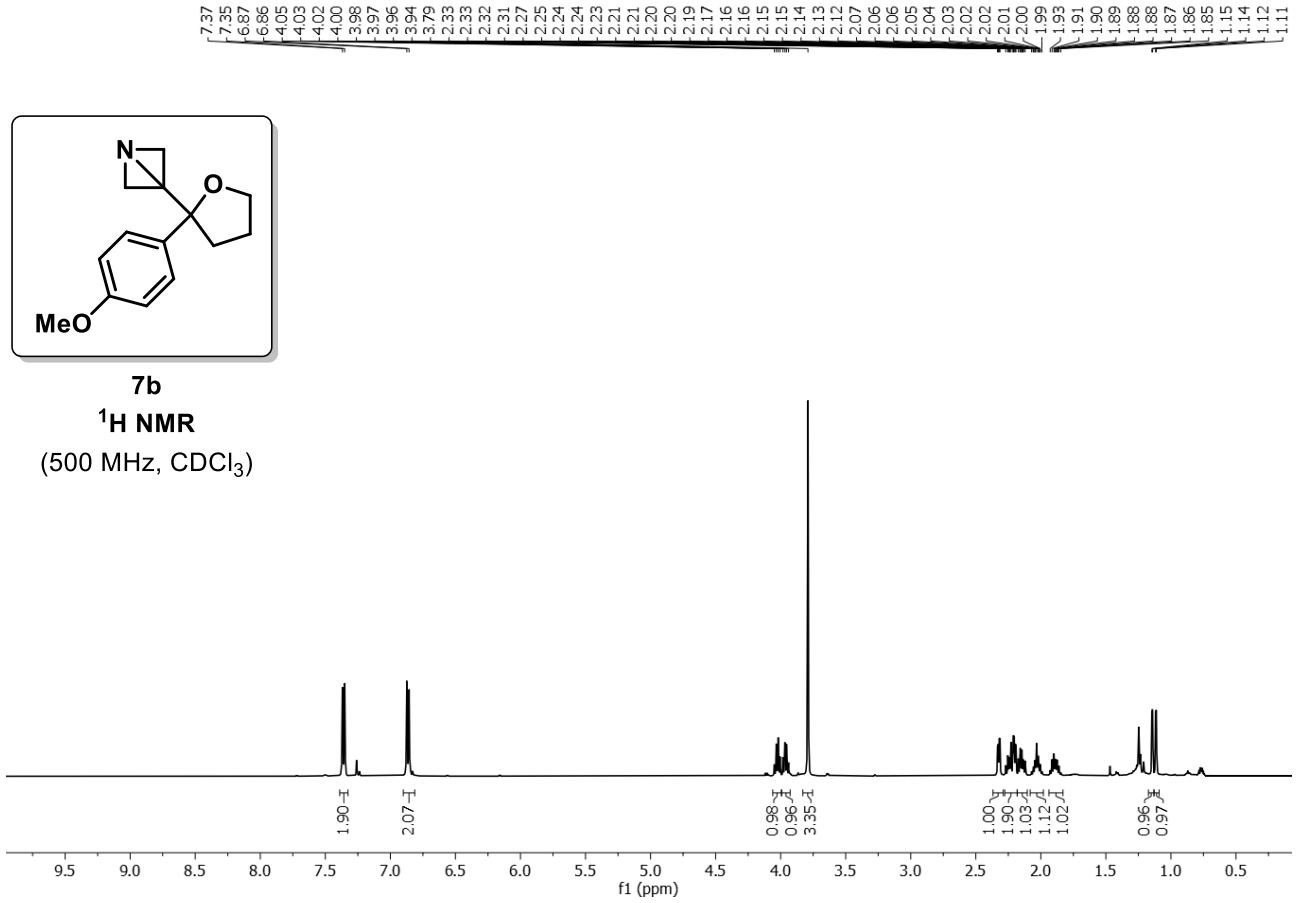

Chemical shifts (ppm): -158.78, -136.08, -126.88, -113.57, -83.14, -68.68, 55.35, 52.69, 52.25, 36.16, 35.85, 26.00

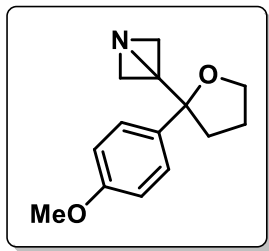

**7b**  
<sup>13</sup>C NMR  
 (126 MHz, CDCl<sub>3</sub>)

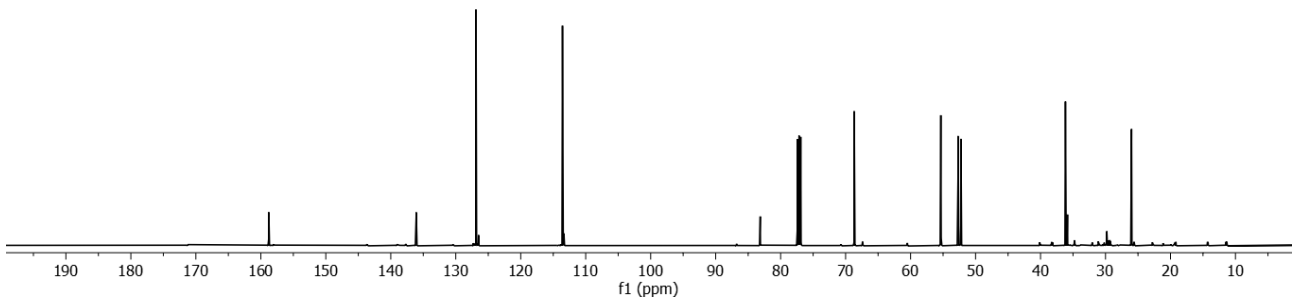

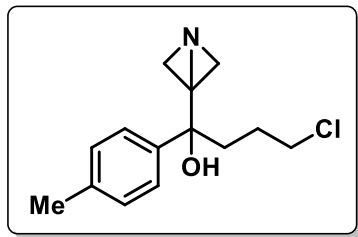

**13i**  
**<sup>1</sup>H NMR**  
 (500 MHz, CDCl<sub>3</sub>)

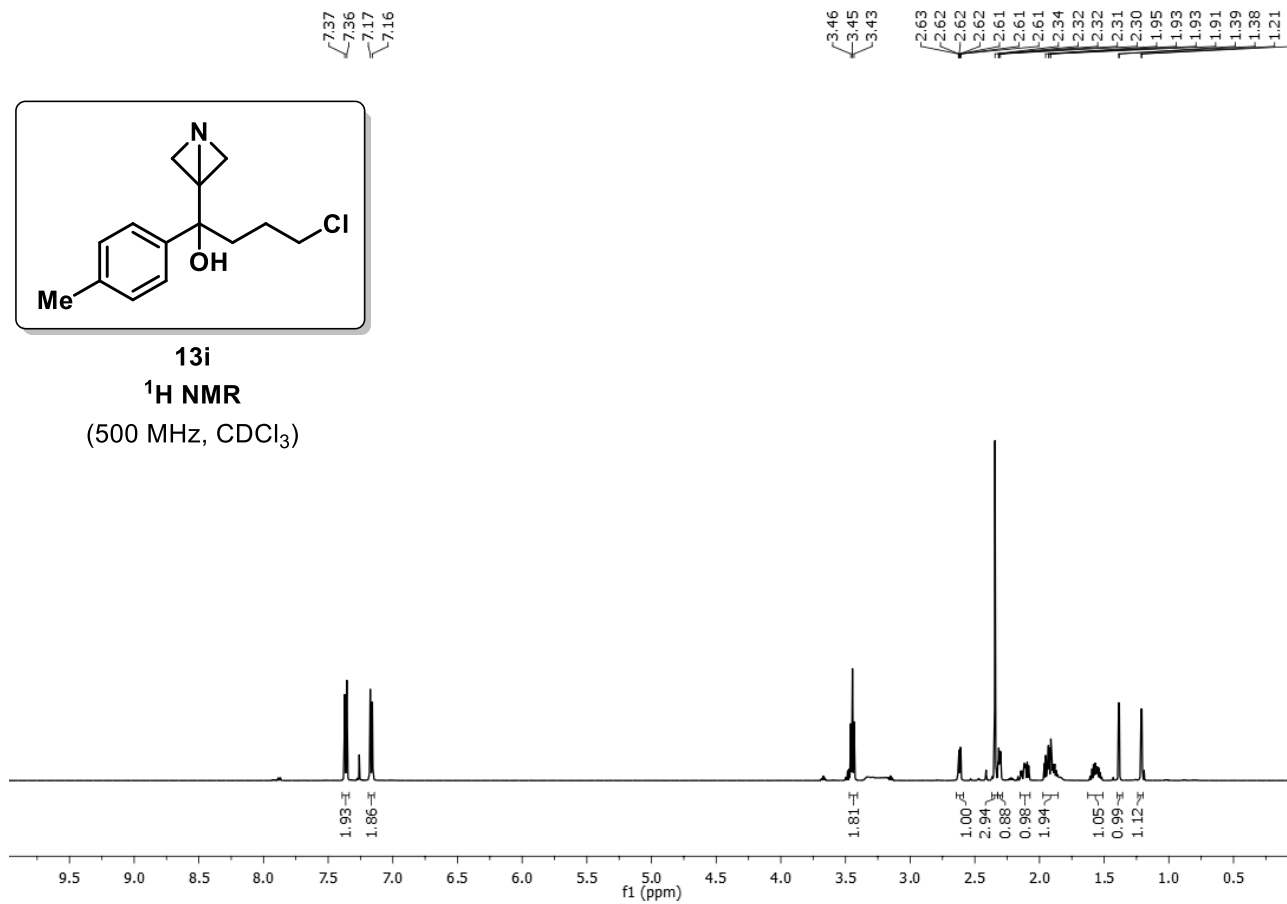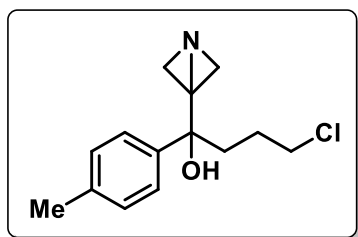

**13i**  
**<sup>13</sup>C NMR**  
 (126 MHz, CDCl<sub>3</sub>)

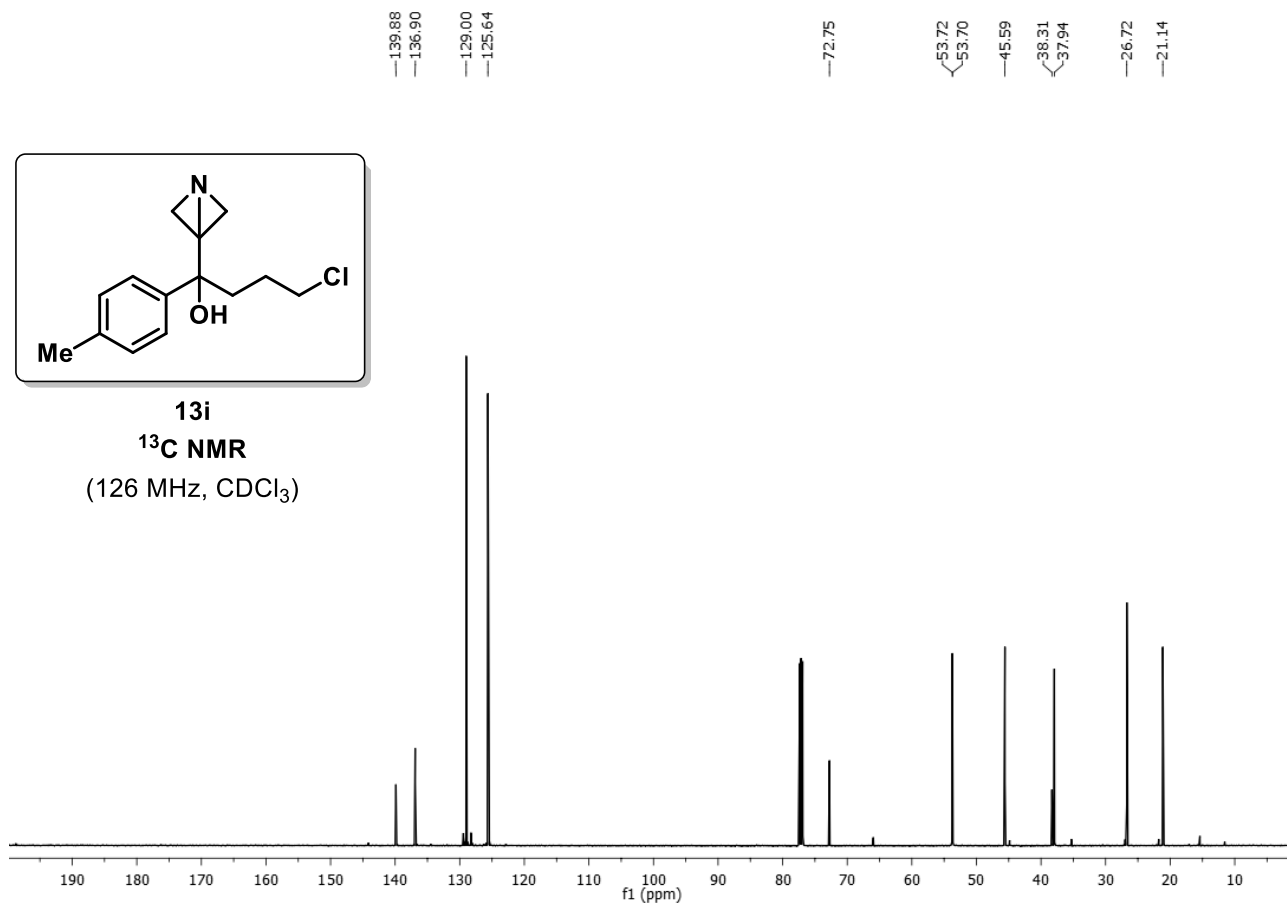



7.35  
7.34  
7.33  
7.33  
7.16  
7.14  
7.14  
4.06  
4.04  
4.03  
4.02  
4.00  
3.98  
3.98  
3.97  
3.96  
3.95  
3.95  
2.36  
2.35  
2.35  
2.34  
2.34  
2.28  
2.26  
2.25  
2.25  
2.24  
2.24  
2.23  
2.22  
2.22  
2.18  
2.17  
2.17  
2.16  
2.15  
2.14  
2.14  
2.13  
2.06  
2.06  
2.05  
2.05  
2.04  
2.04  
2.04  
2.03  
2.03  
2.02  
2.02  
2.01  
2.01  
2.01  
1.93  
1.91  
1.90  
1.89  
1.89  
1.88  
1.86  
1.16  
1.15  
1.15  
1.12  
1.11

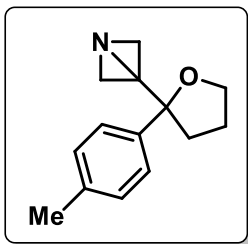

**7c**  
**<sup>1</sup>H NMR**  
(500 MHz, CDCl<sub>3</sub>)

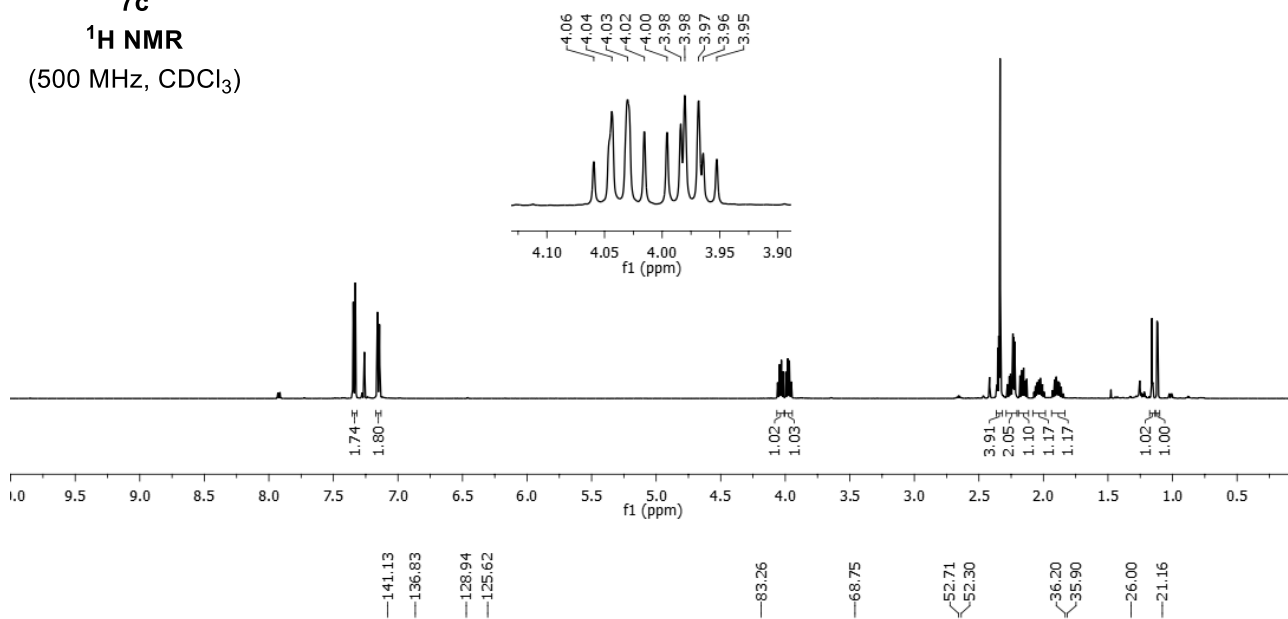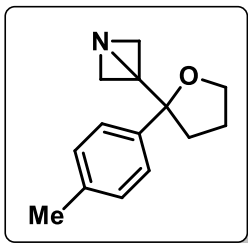

**7c**  
**<sup>13</sup>C NMR**  
(126 MHz, CDCl<sub>3</sub>)

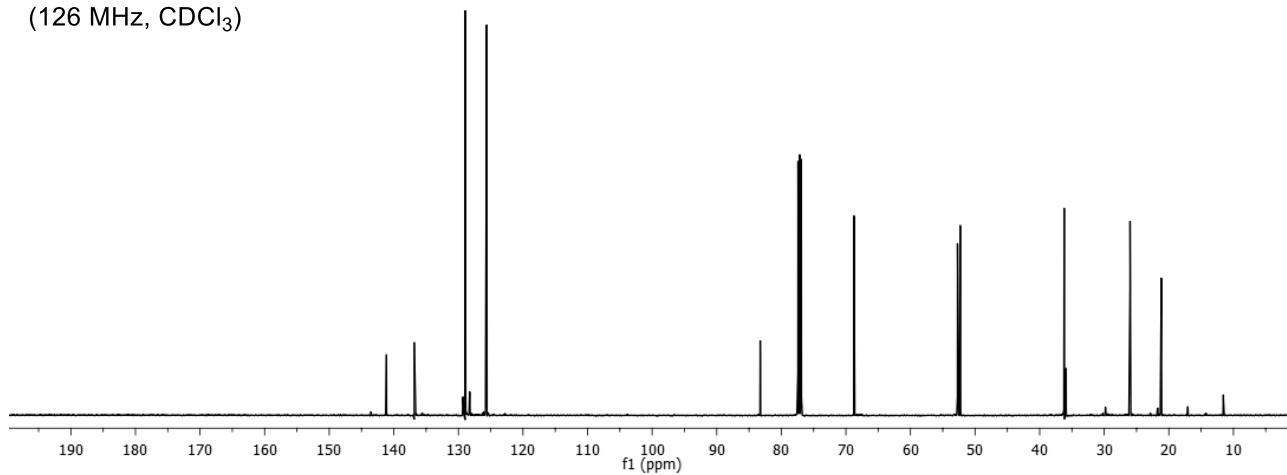

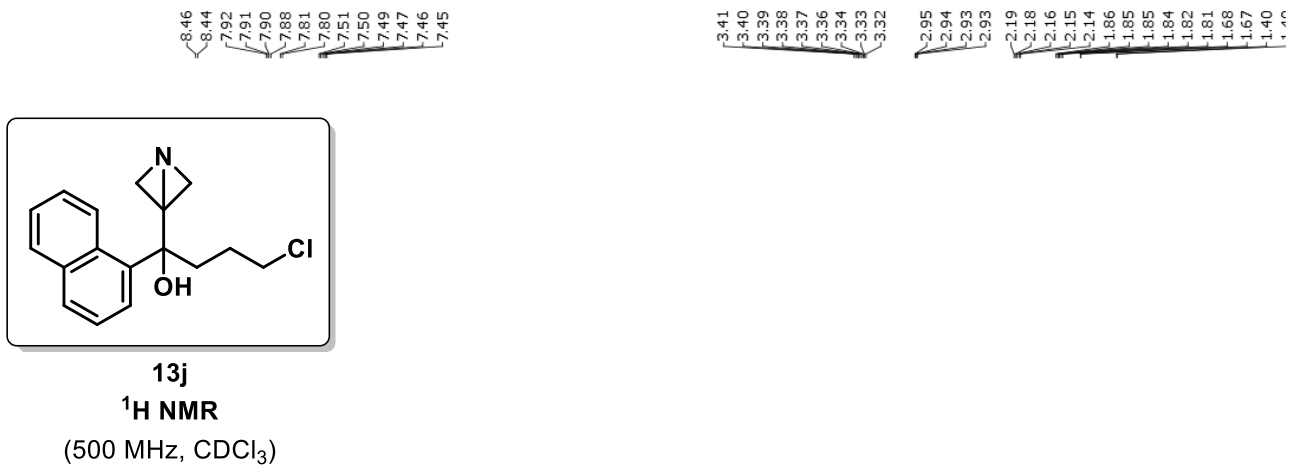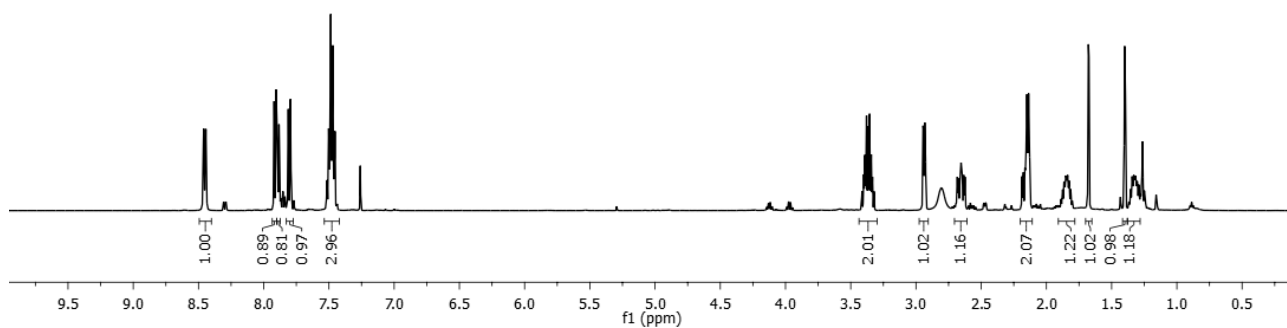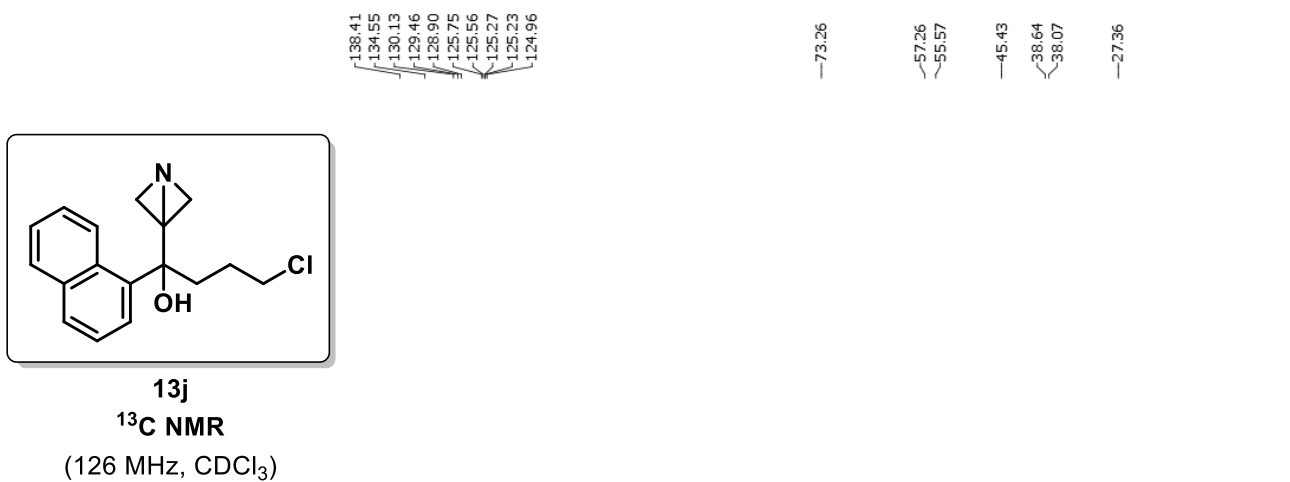

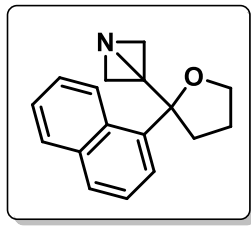

**7d**  
<sup>1</sup>H NMR  
 (500 MHz, CDCl<sub>3</sub>)

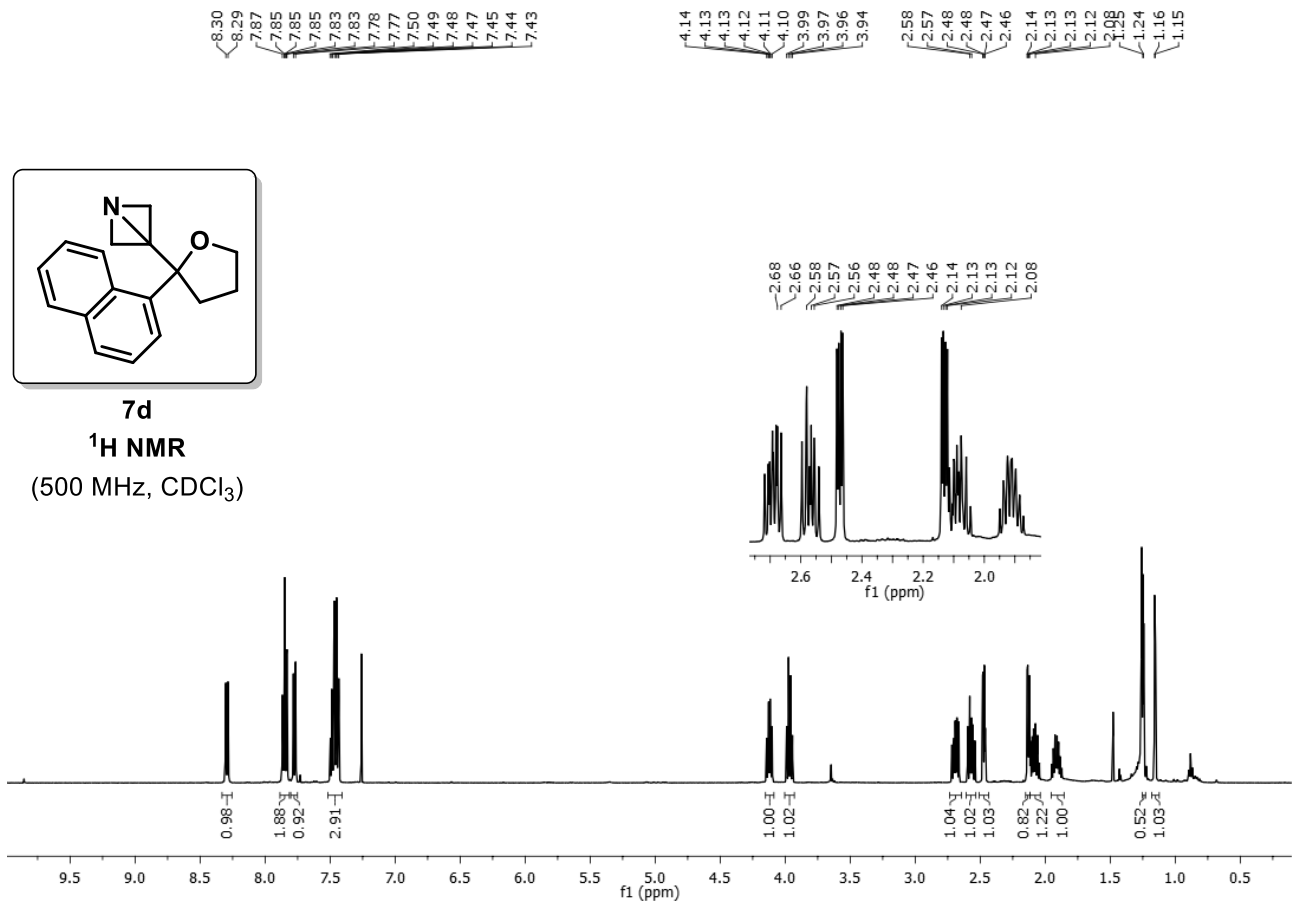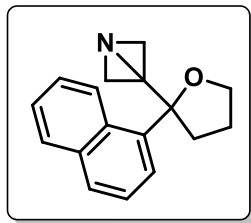

**7d**  
<sup>13</sup>C NMR  
 (126 MHz, CDCl<sub>3</sub>)

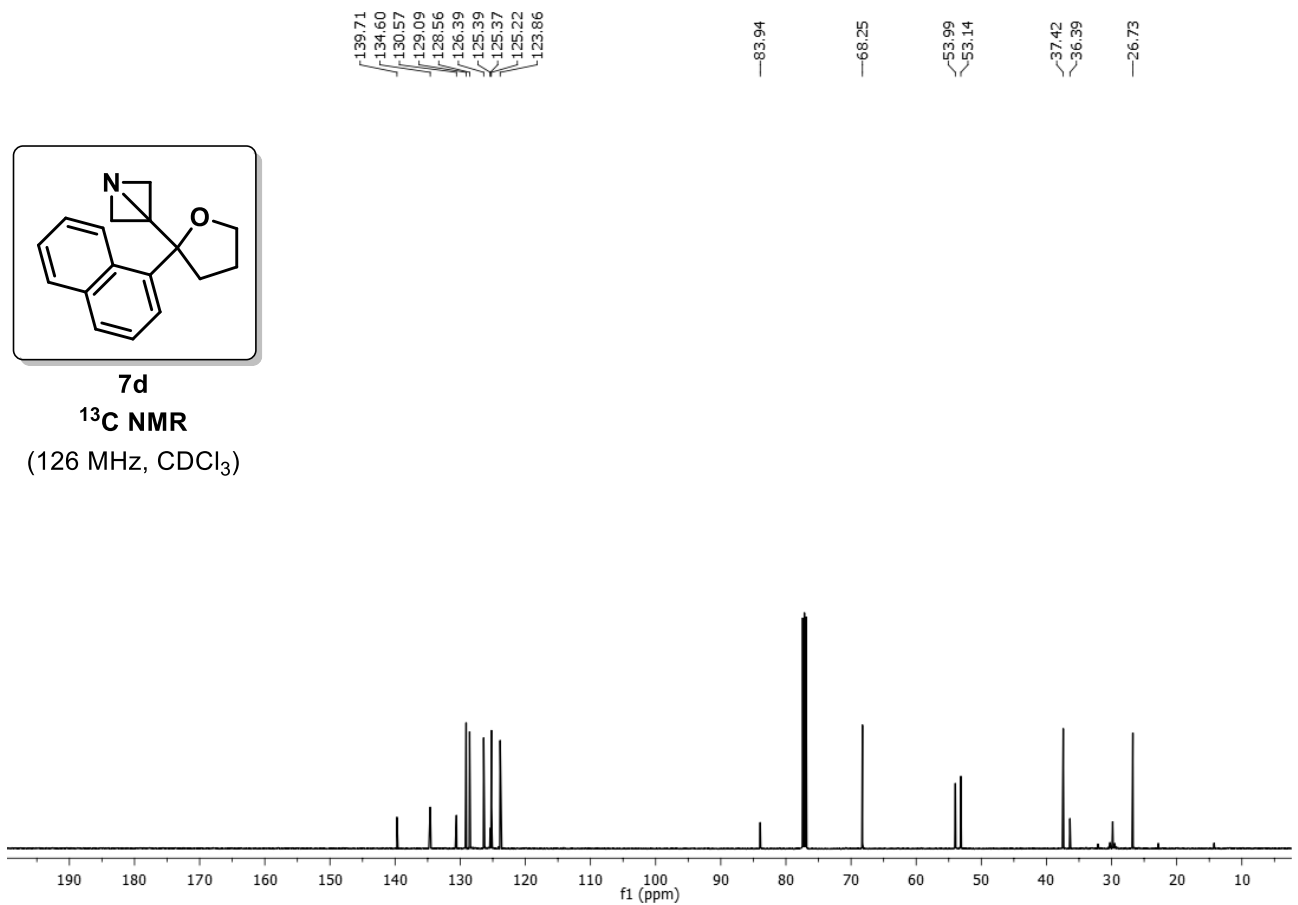

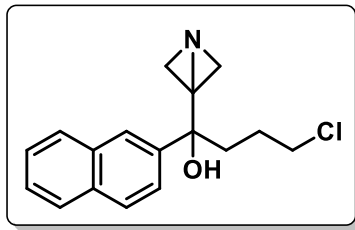

**13k**  
 $^1\text{H NMR}$   
 (500 MHz,  $\text{CDCl}_3$ )

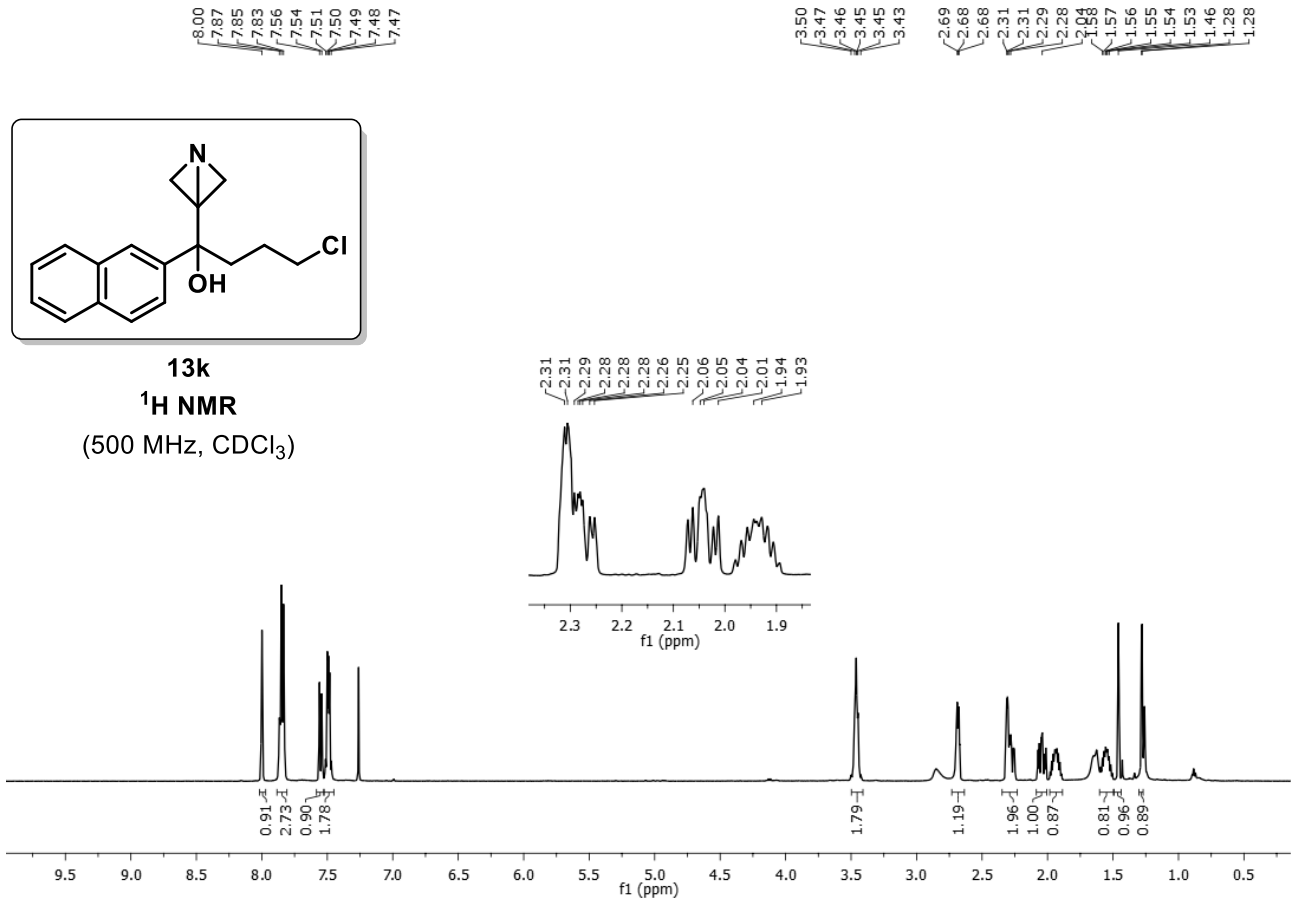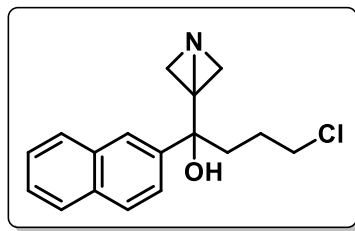

**13k**  
 $^{13}\text{C NMR}$   
 (126 MHz,  $\text{CDCl}_3$ )

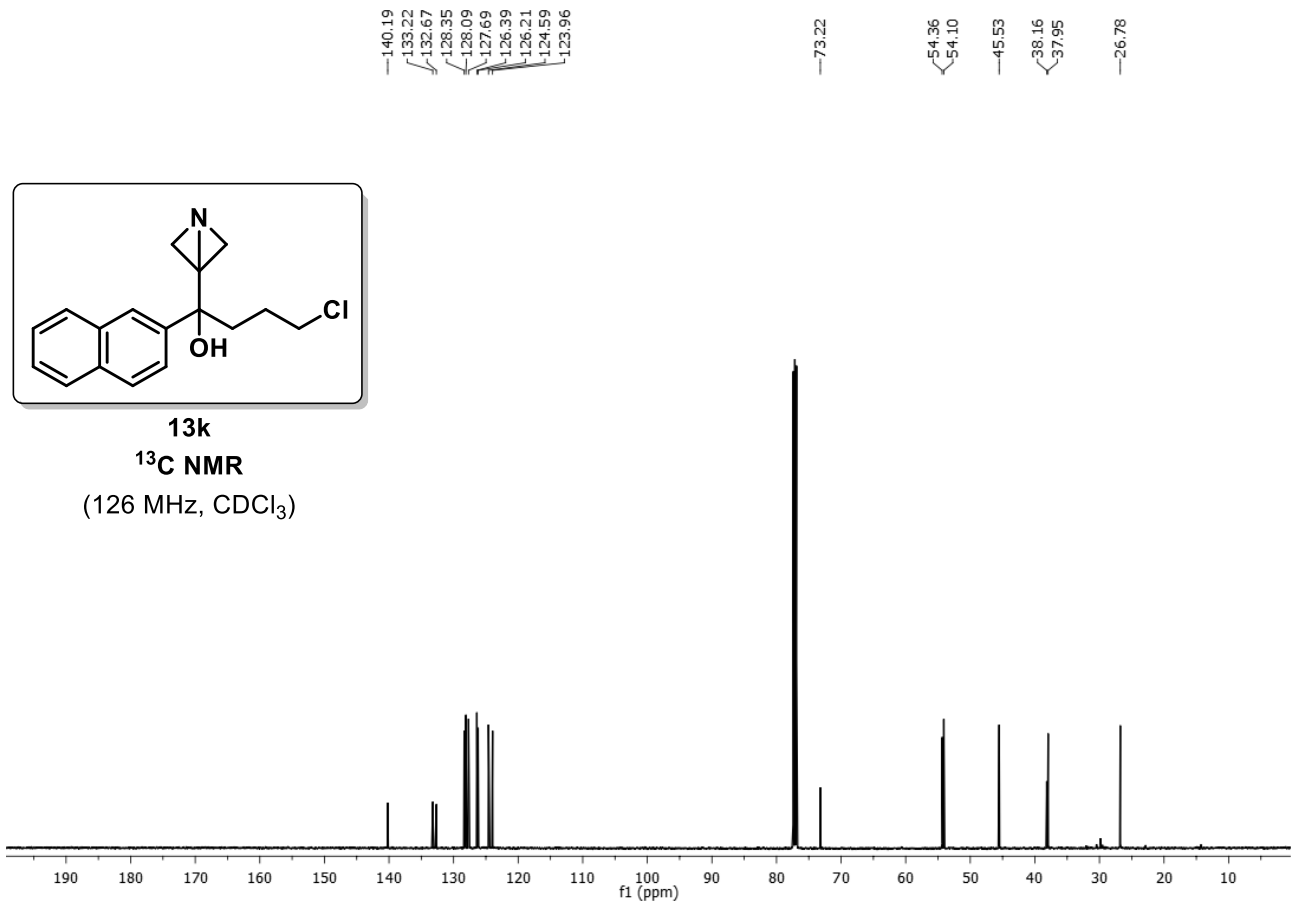

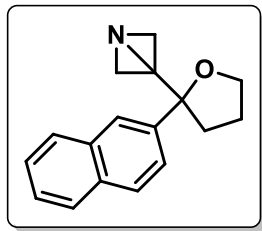

**7e**  
**<sup>1</sup>H NMR**  
(500 MHz, CDCl<sub>3</sub>)

● residual solvent

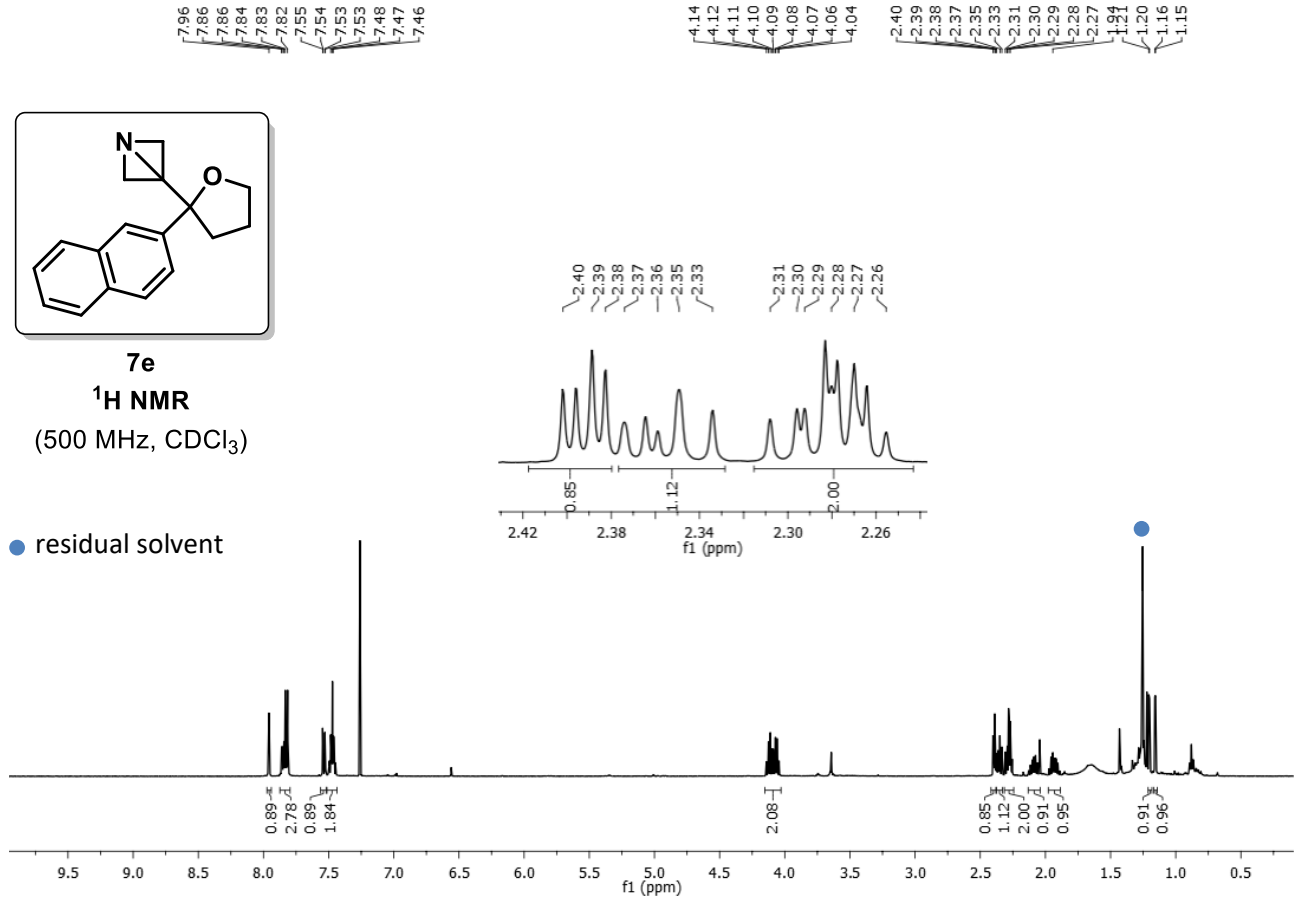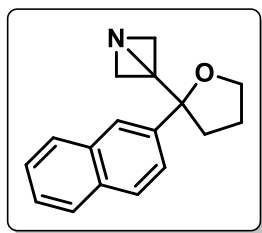

**7e**  
**<sup>13</sup>C NMR**  
(126 MHz, CDCl<sub>3</sub>)

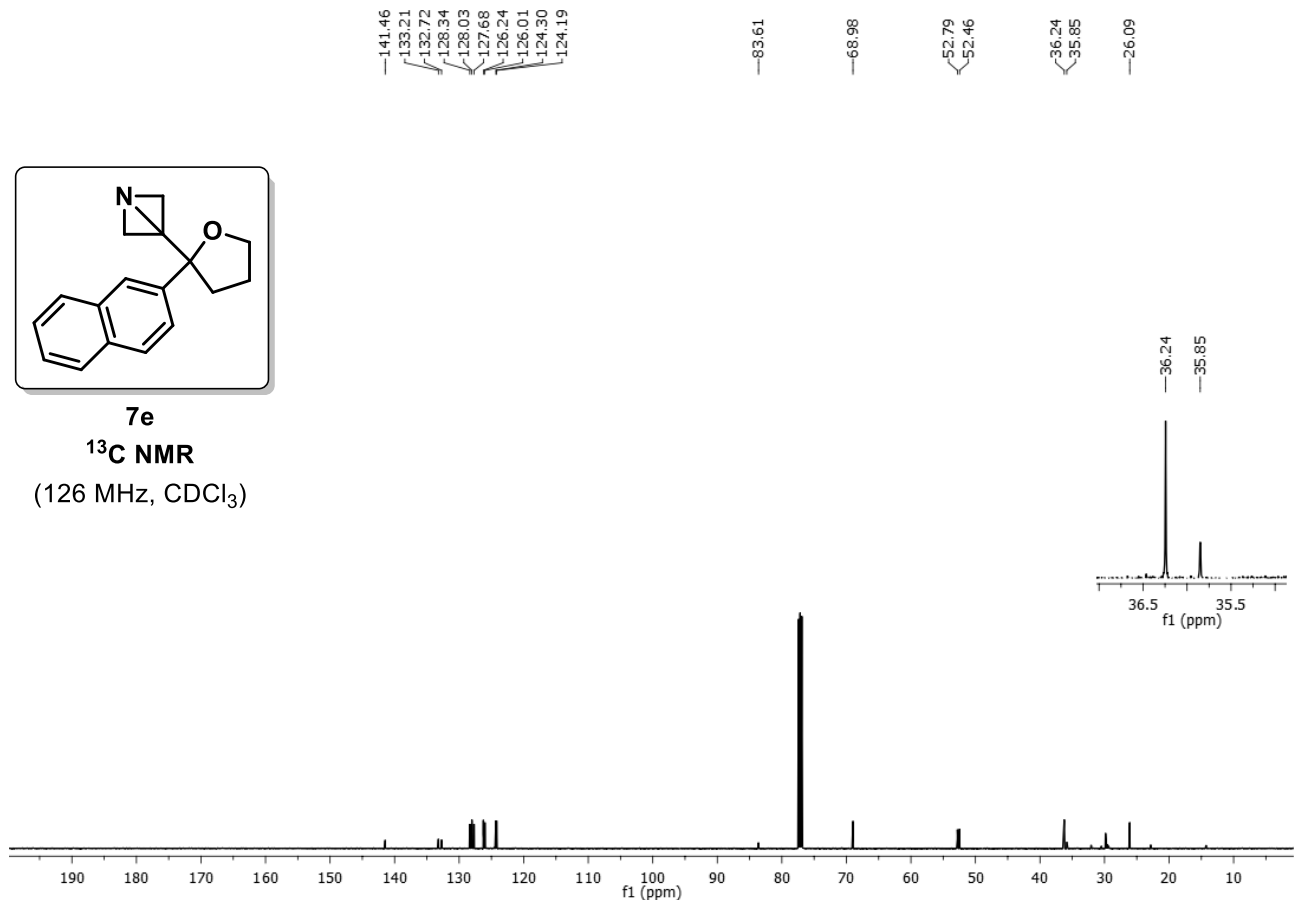

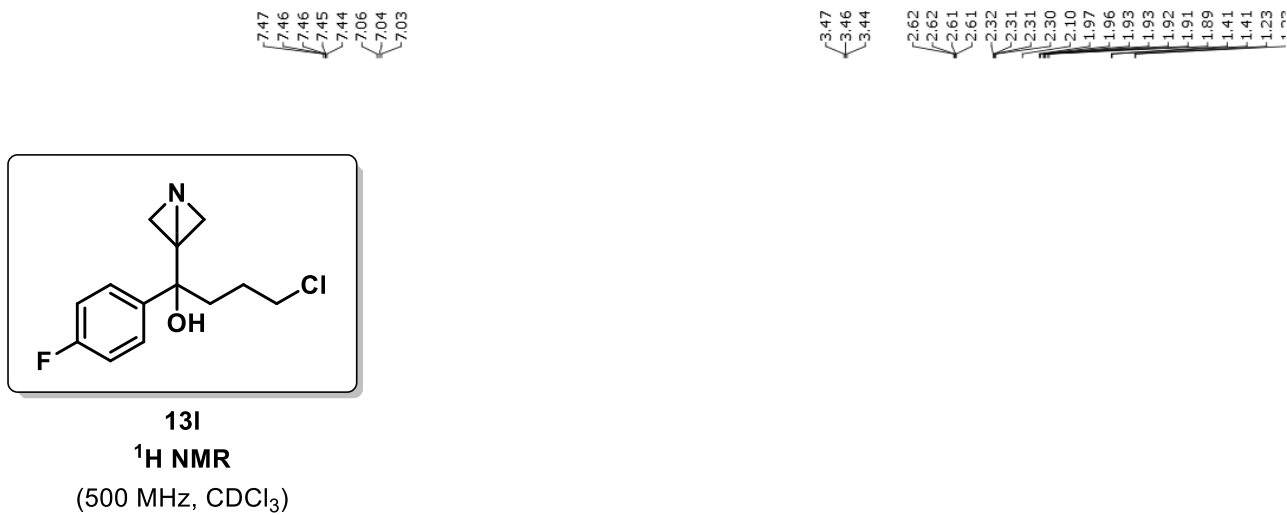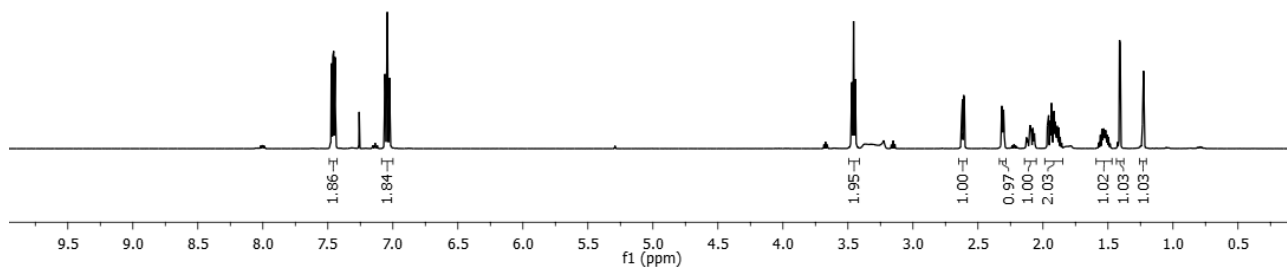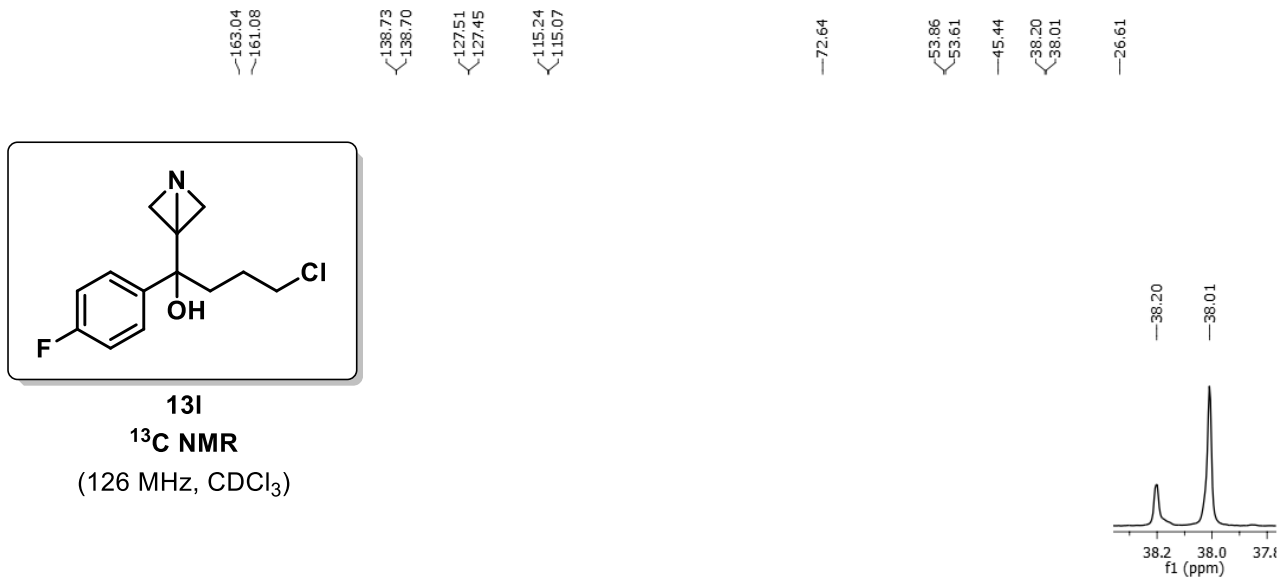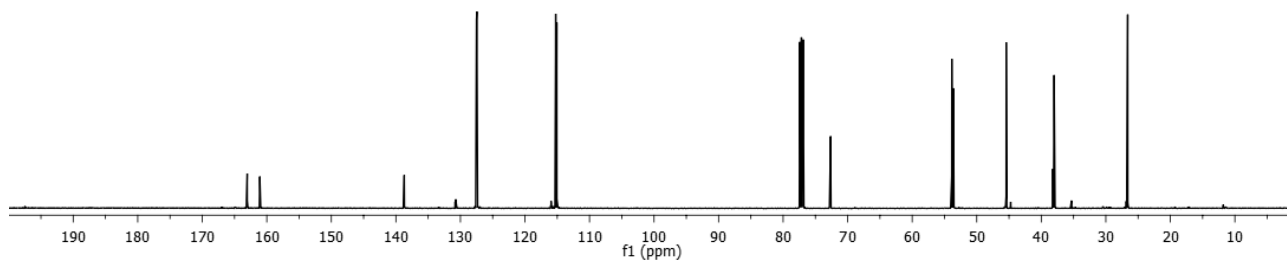

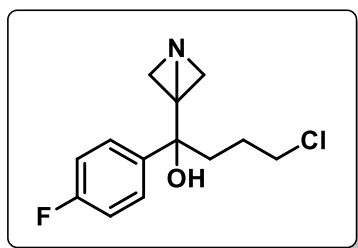

**13**  
<sup>19</sup>F NMR  
 (470 MHz, CDCl<sub>3</sub>)

115.68  
 115.69  
 115.70  
 115.71  
 115.72

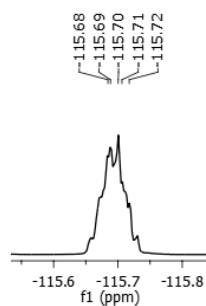

115.68  
 115.69  
 115.70  
 115.71  
 115.72

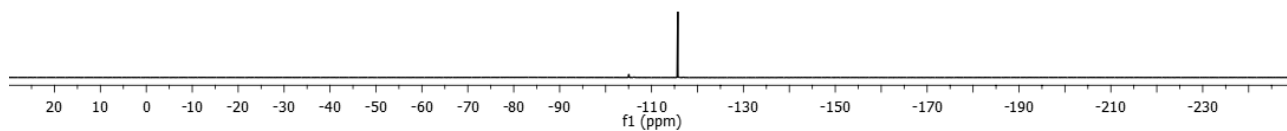

7.43  
 7.42  
 7.41  
 7.41  
 7.40  
 7.39  
 7.38  
 7.05  
 7.03  
 7.02  
 7.01  
 7.00  
 6.99  
 6.98  
 6.97

4.08  
 4.05  
 4.03  
 4.02  
 4.01  
 4.00  
 3.98  
 3.96  
 3.95  
 3.94  
 3.93  
 2.33  
 2.32  
 2.31  
 2.30  
 2.25  
 2.20  
 2.19  
 2.17  
 2.14  
 2.12  
 2.08  
 1.18  
 1.15  
 1.13  
 1.12

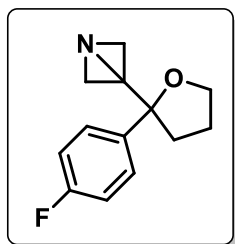

**7f**  
<sup>1</sup>H NMR  
 (300 MHz, CDCl<sub>3</sub>)

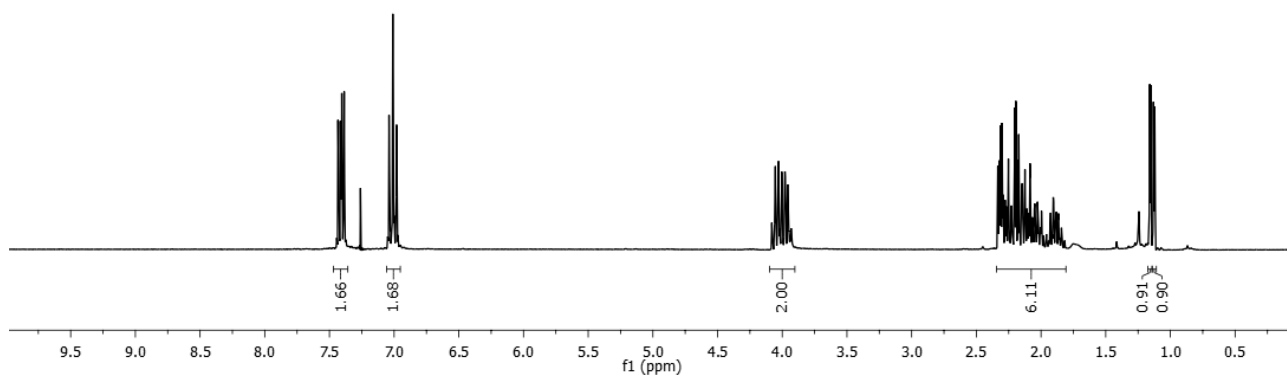

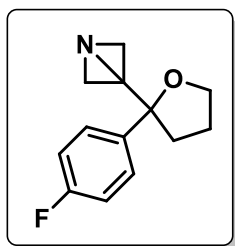

7f

<sup>13</sup>C NMR

(126 MHz, CDCl<sub>3</sub>)

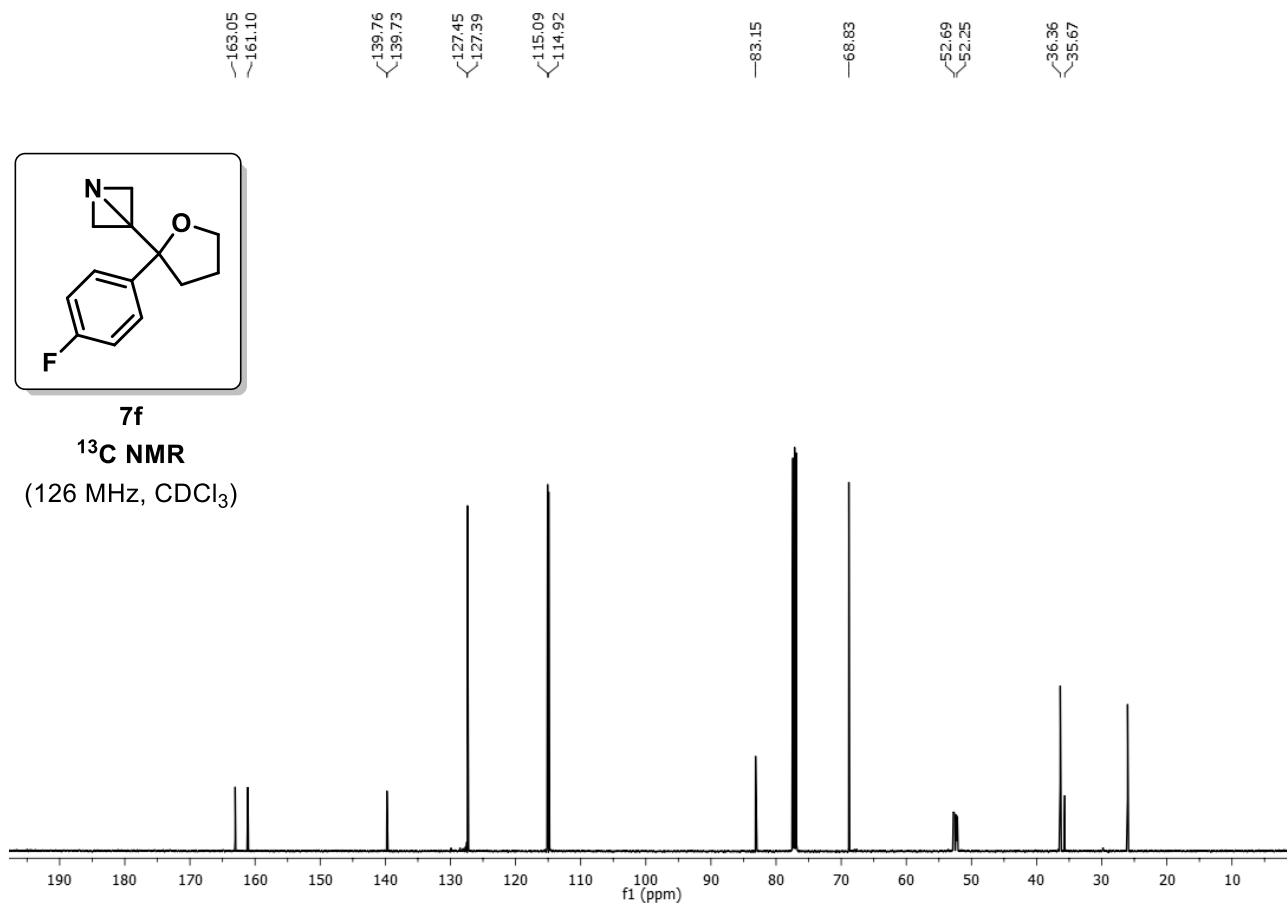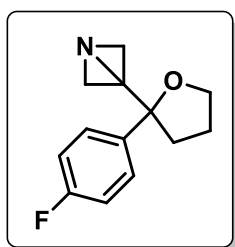

7f

<sup>19</sup>F NMR

(282 MHz, CDCl<sub>3</sub>)

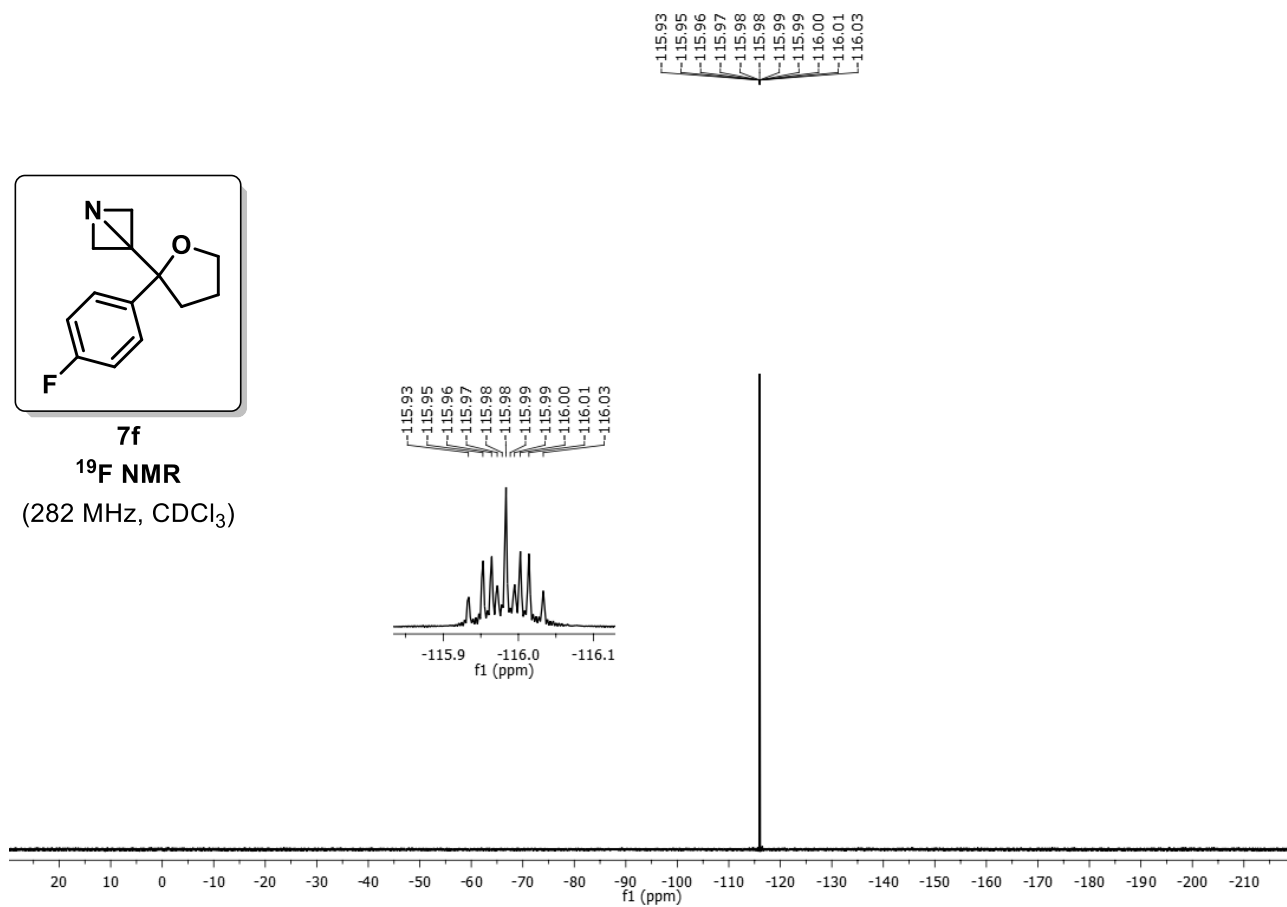



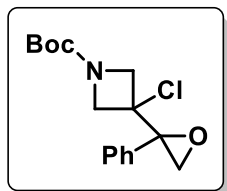

**8a**

**<sup>1</sup>H NMR**  
(500 MHz, CDCl<sub>3</sub>)

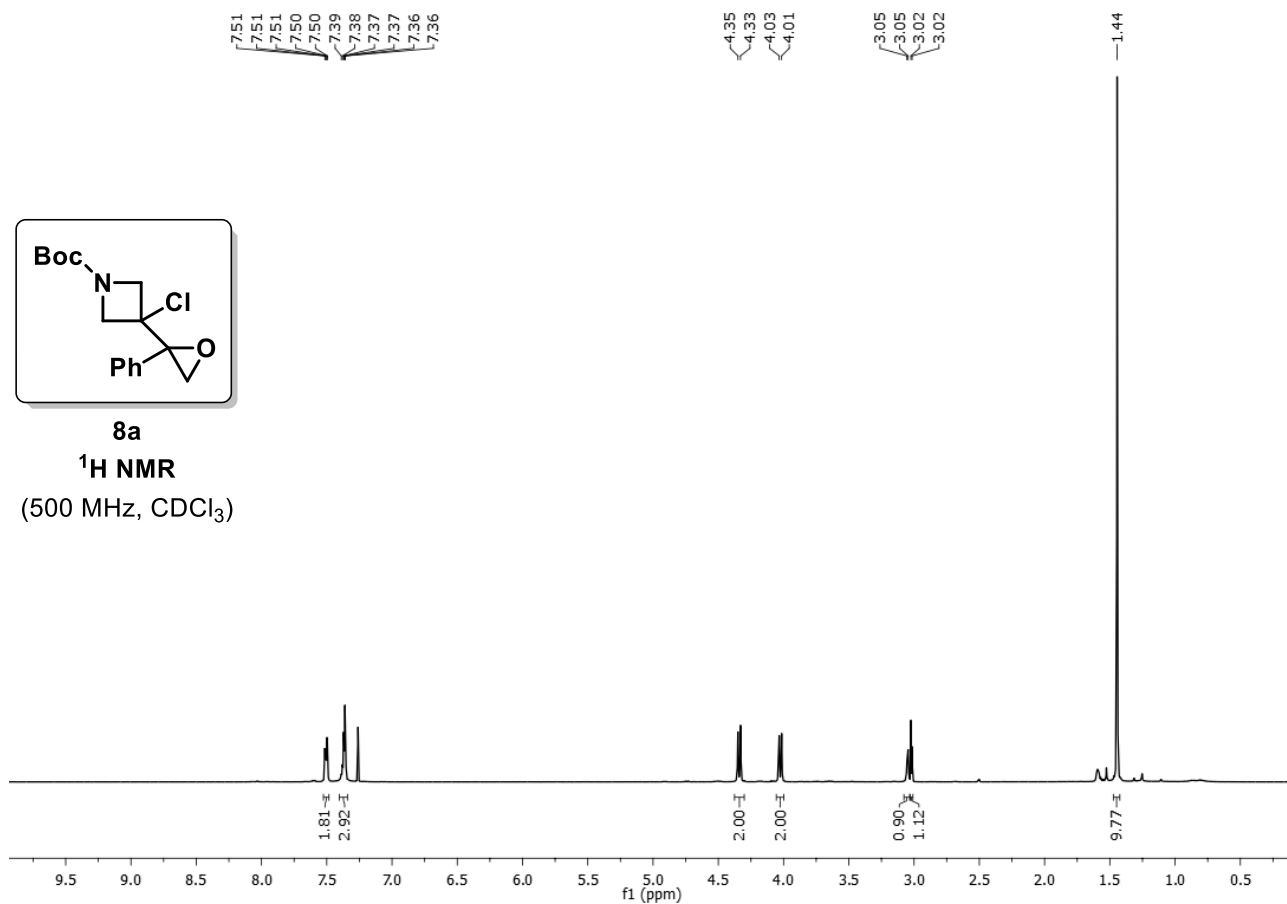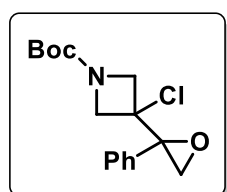

**8a**

**<sup>13</sup>C NMR**  
(126 MHz, CDCl<sub>3</sub>)

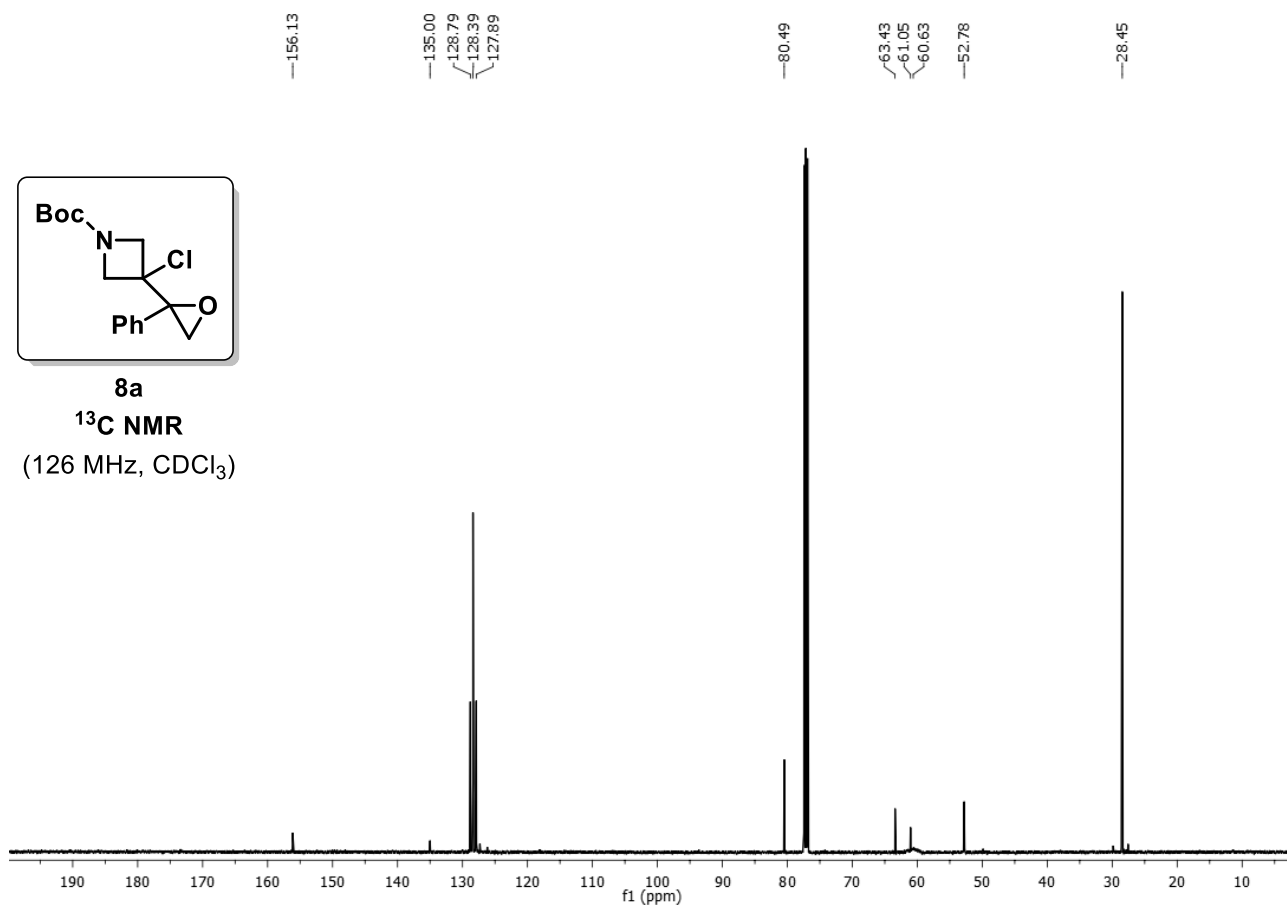

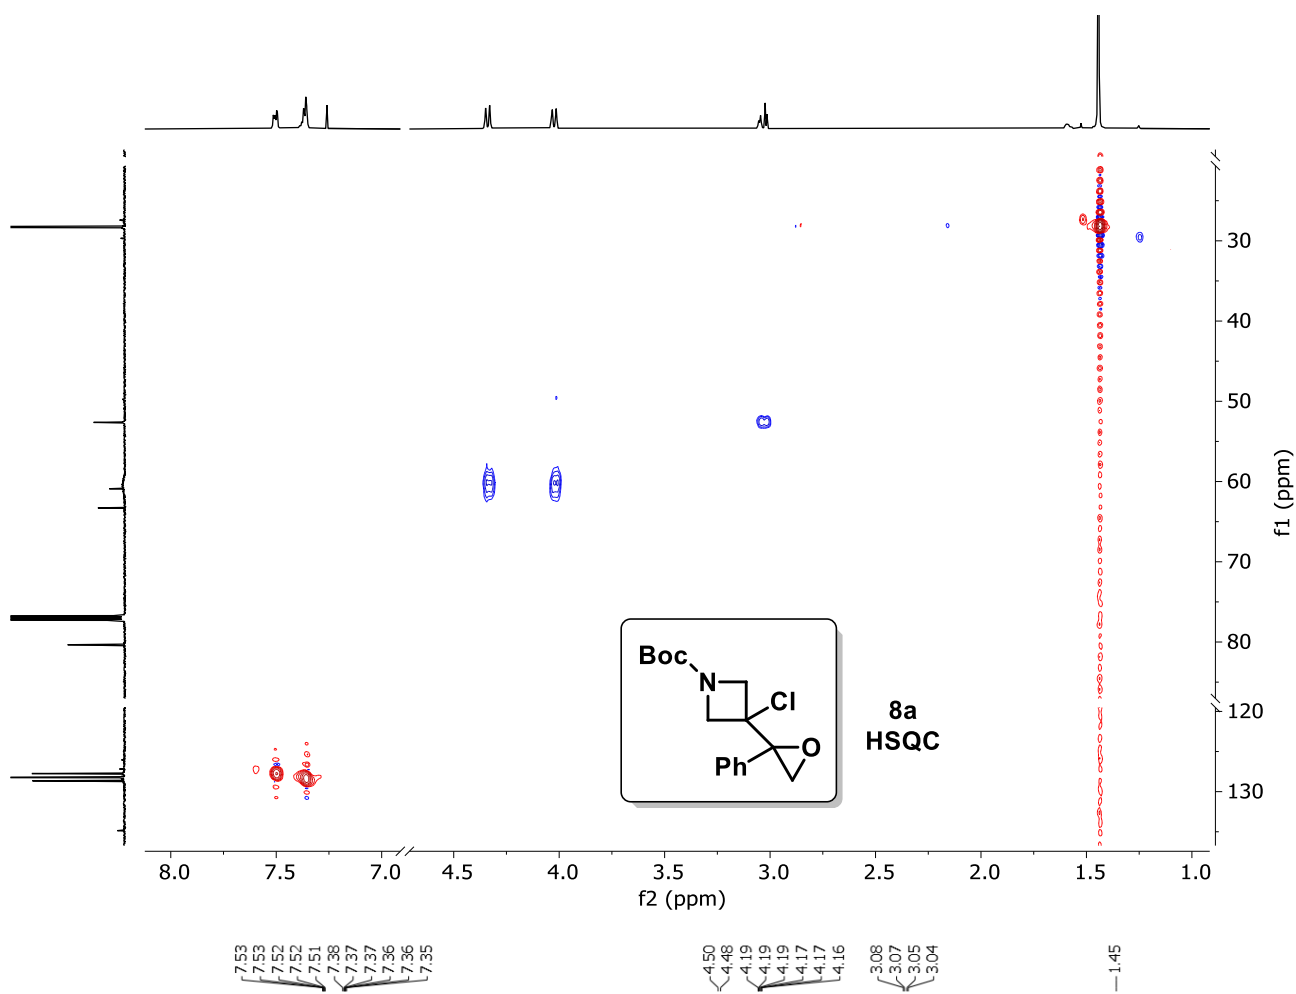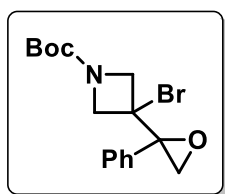

**<sup>1</sup>H NMR**  
(500 MHz, CDCl<sub>3</sub>)

● Boc<sub>2</sub>O impurity

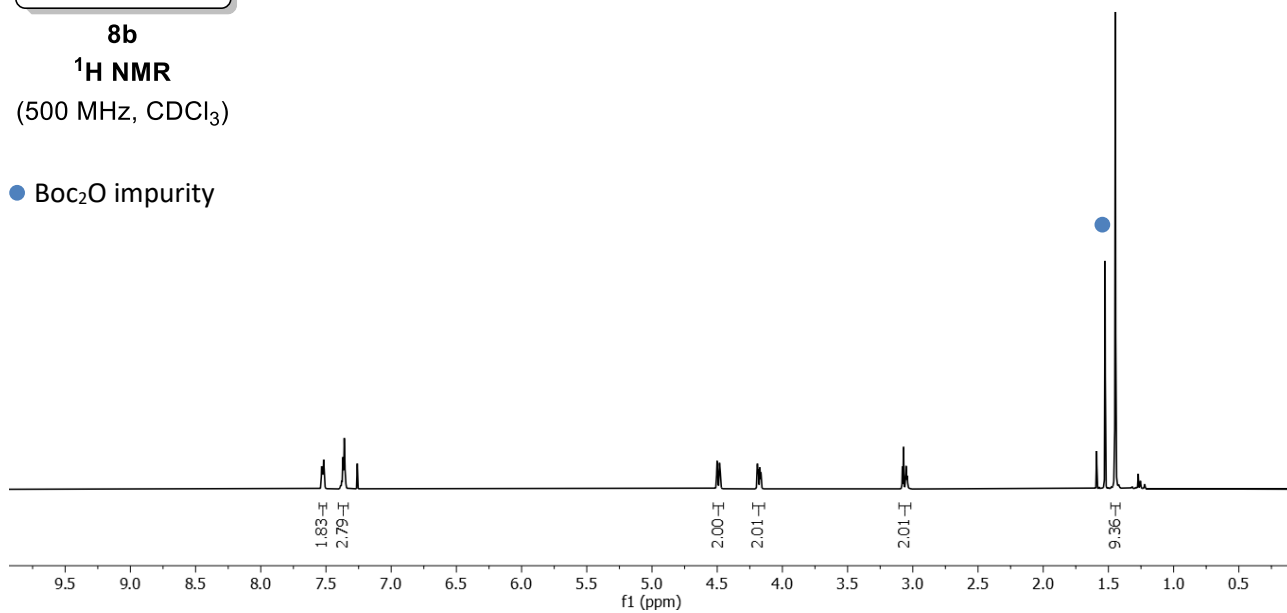

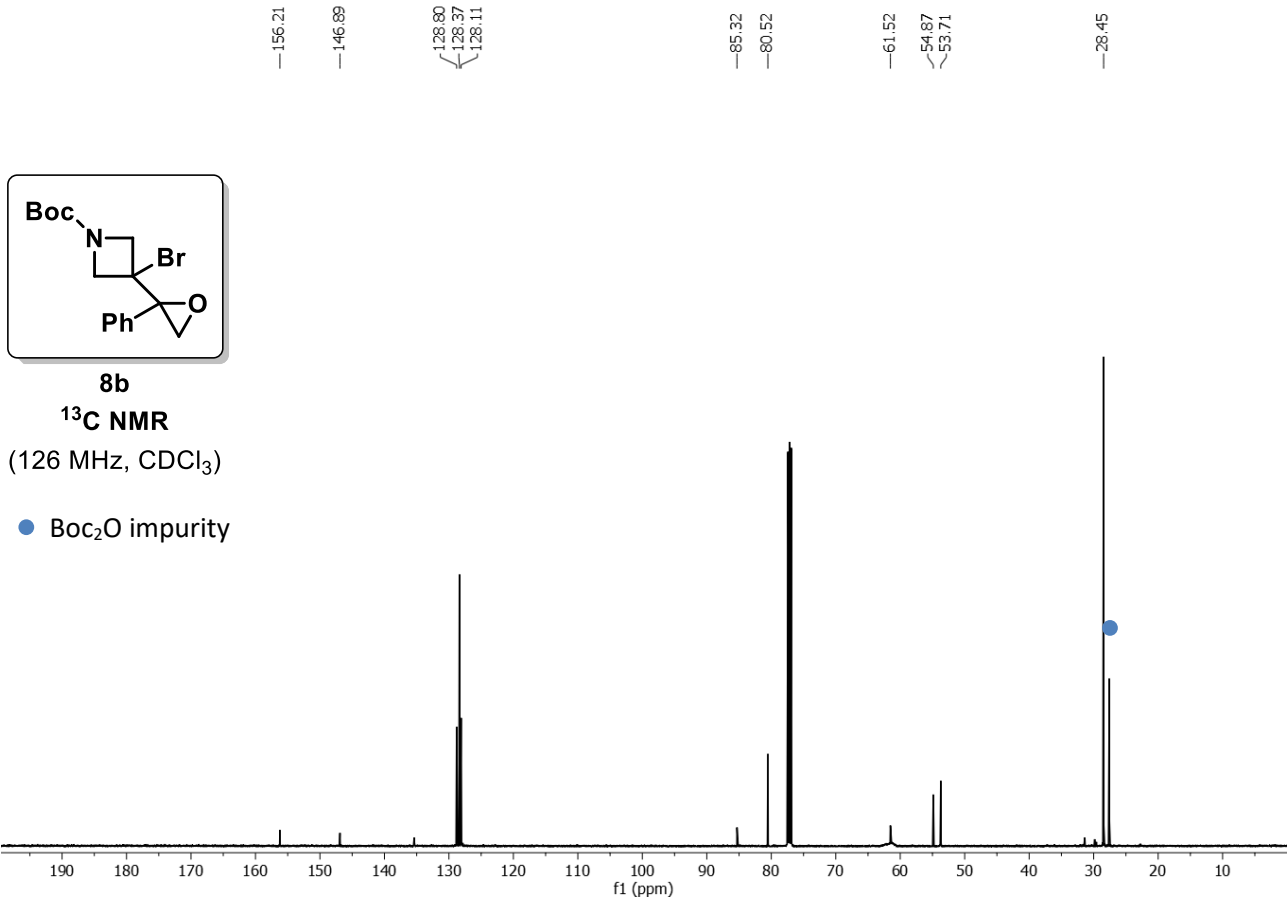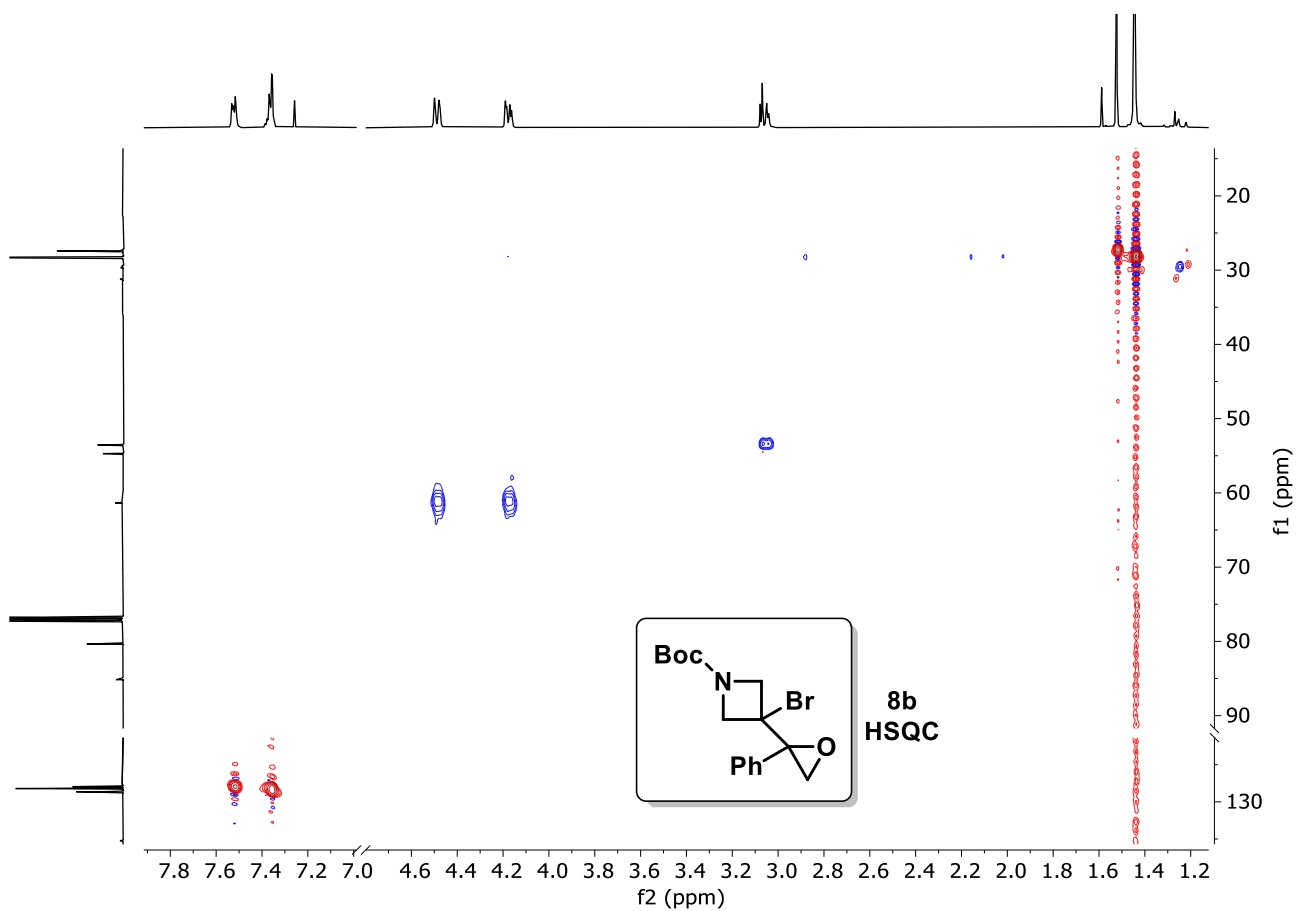

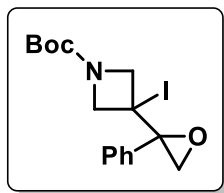

**8c**

**<sup>1</sup>H NMR**  
(500 MHz, CDCl<sub>3</sub>)

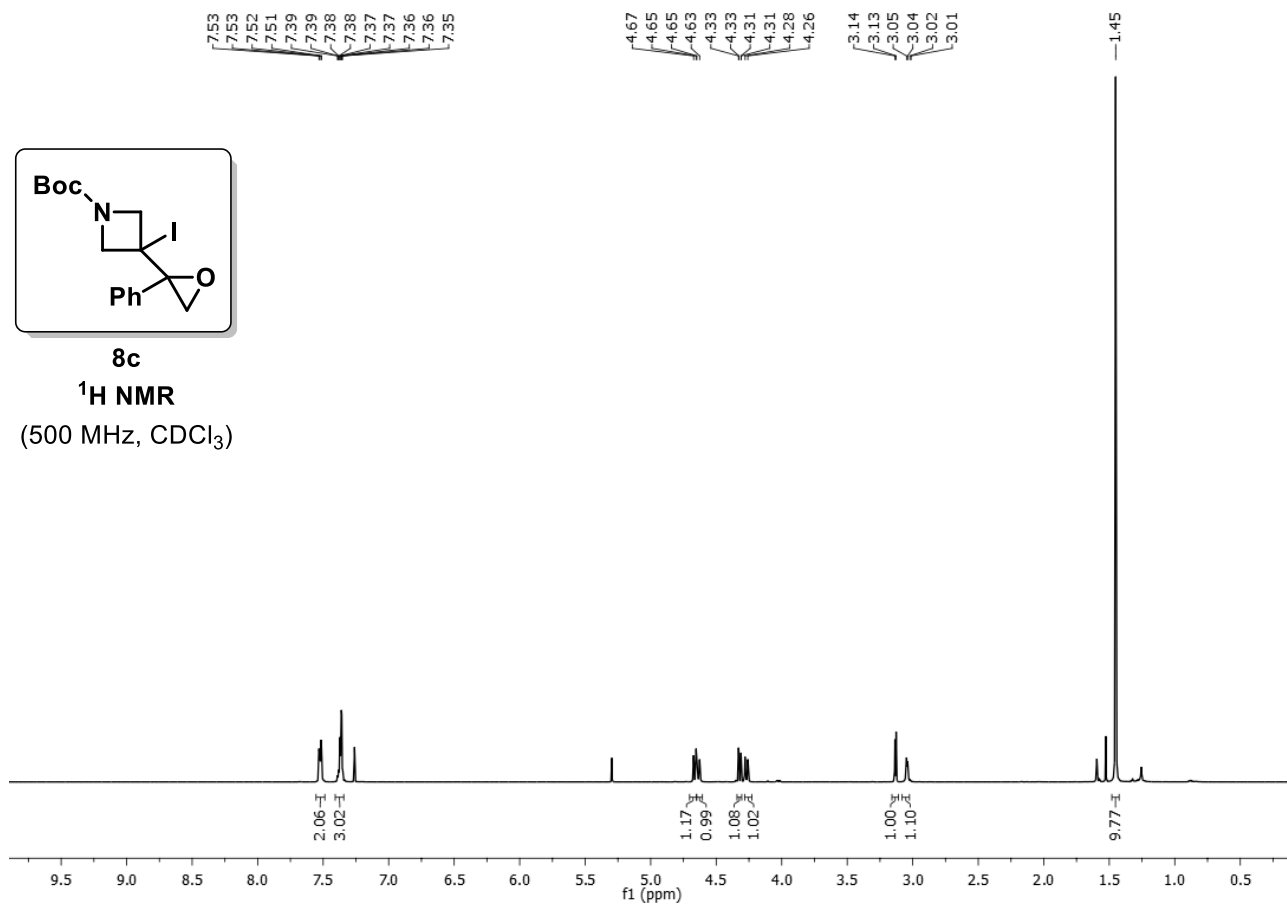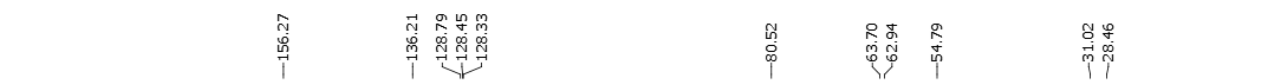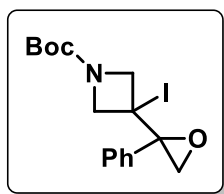

**8c**

**<sup>13</sup>C NMR**  
(126 MHz, CDCl<sub>3</sub>)

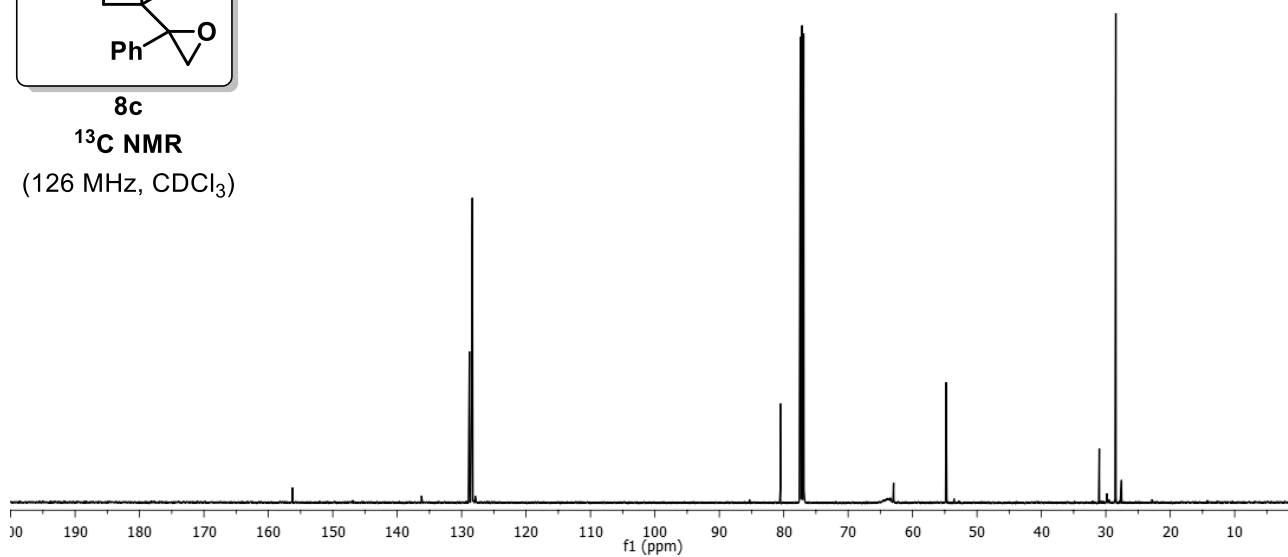

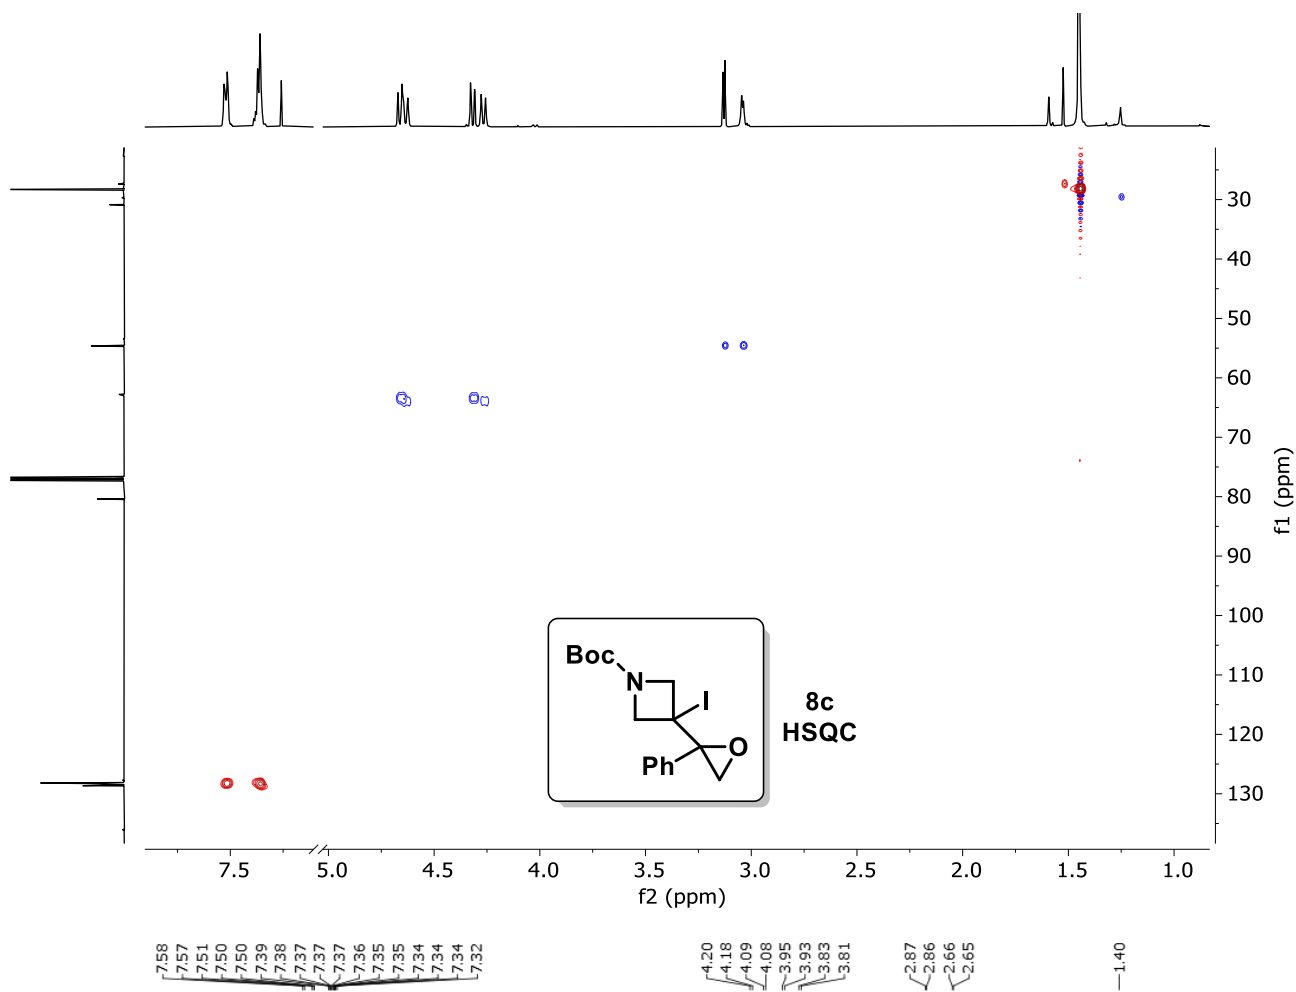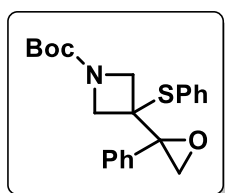

**8d**  
**<sup>1</sup>H NMR**  
 (500 MHz, CDCl<sub>3</sub>)

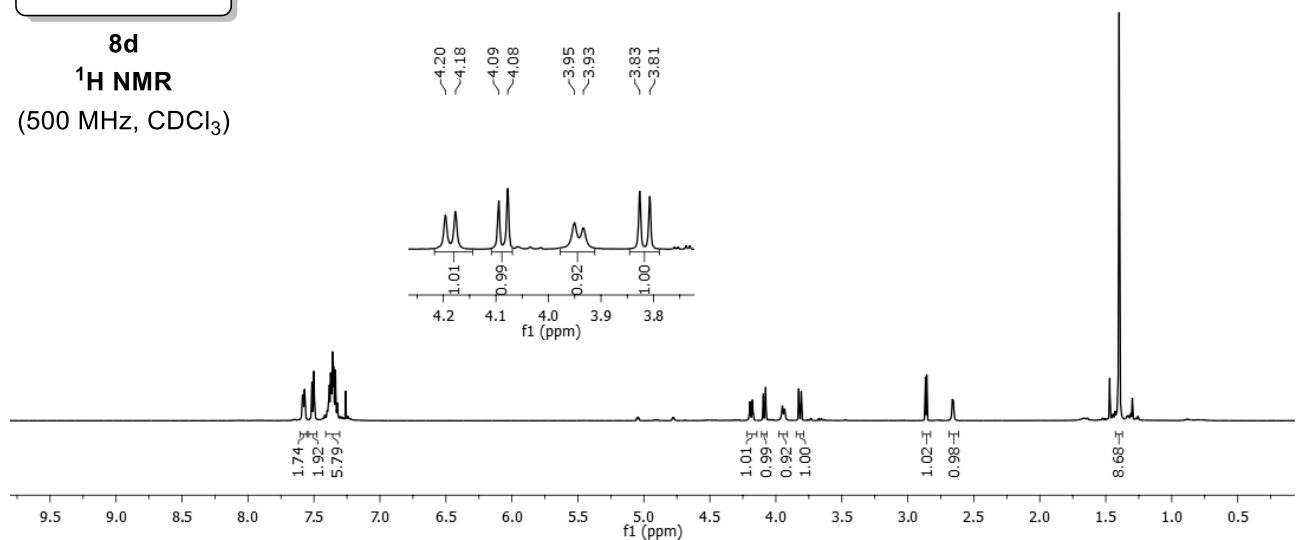

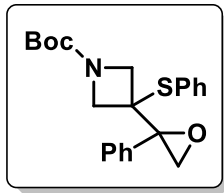

**8d**

**<sup>13</sup>C NMR**

(126 MHz, CDCl<sub>3</sub>)

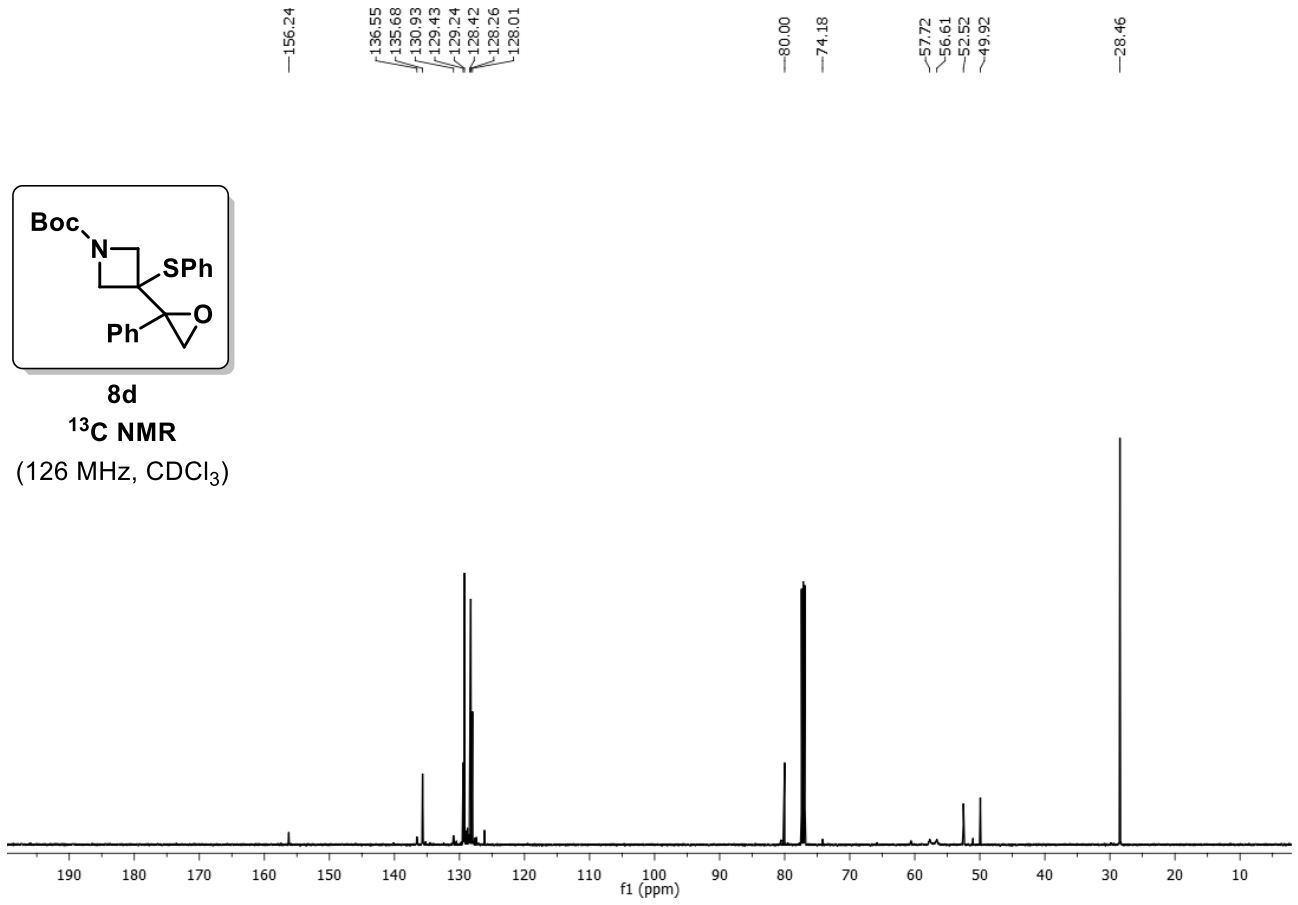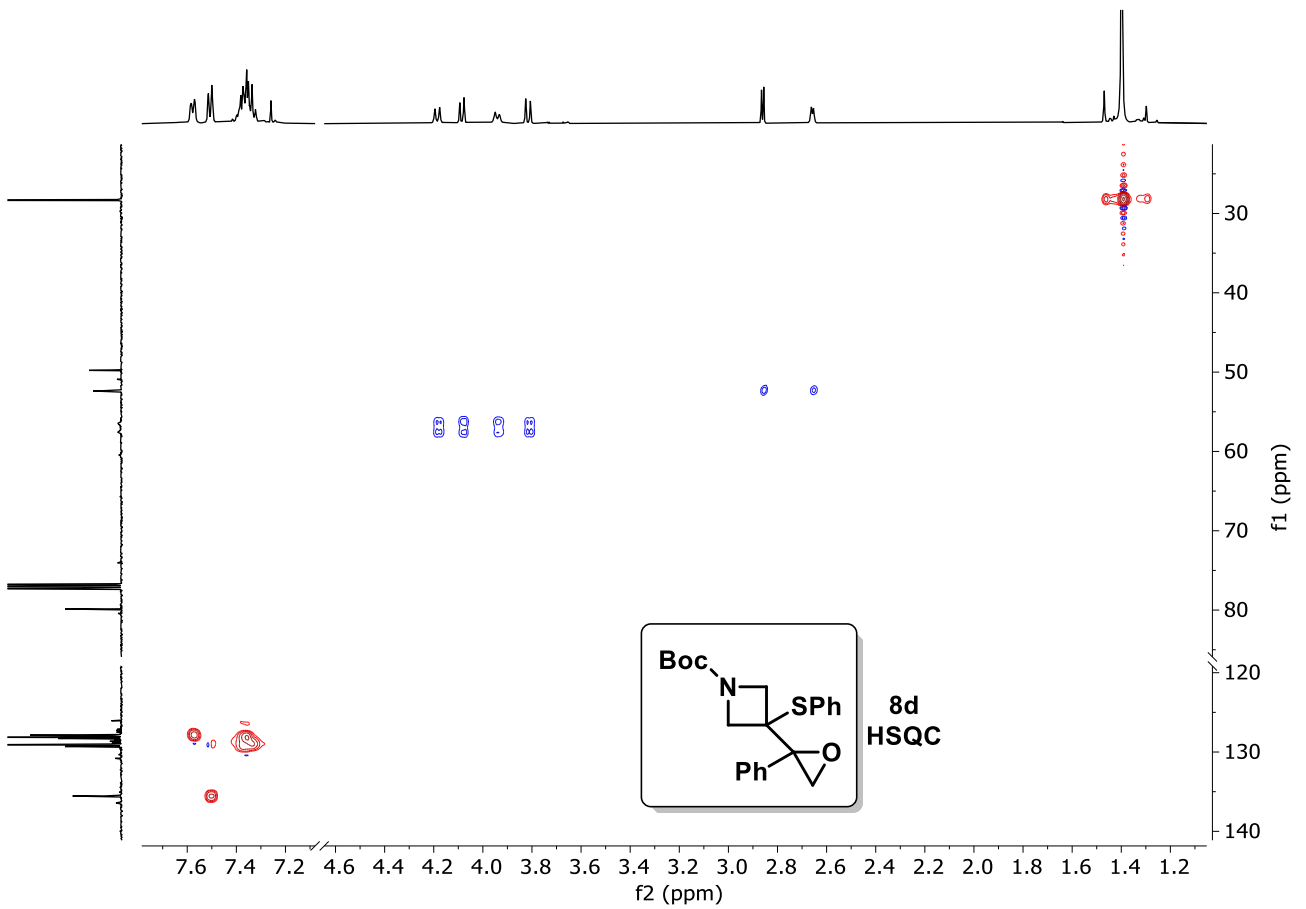

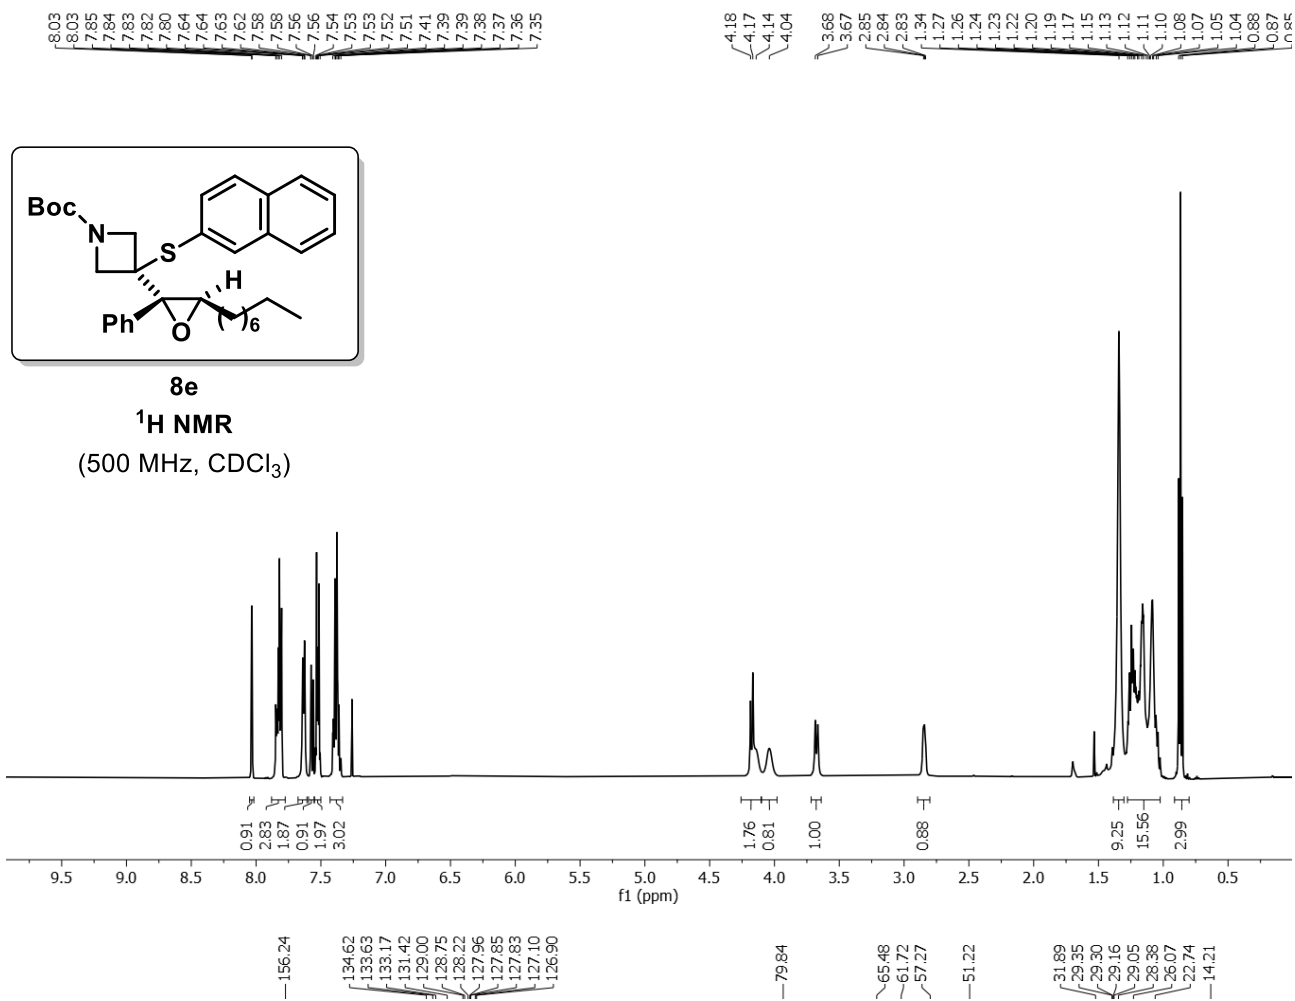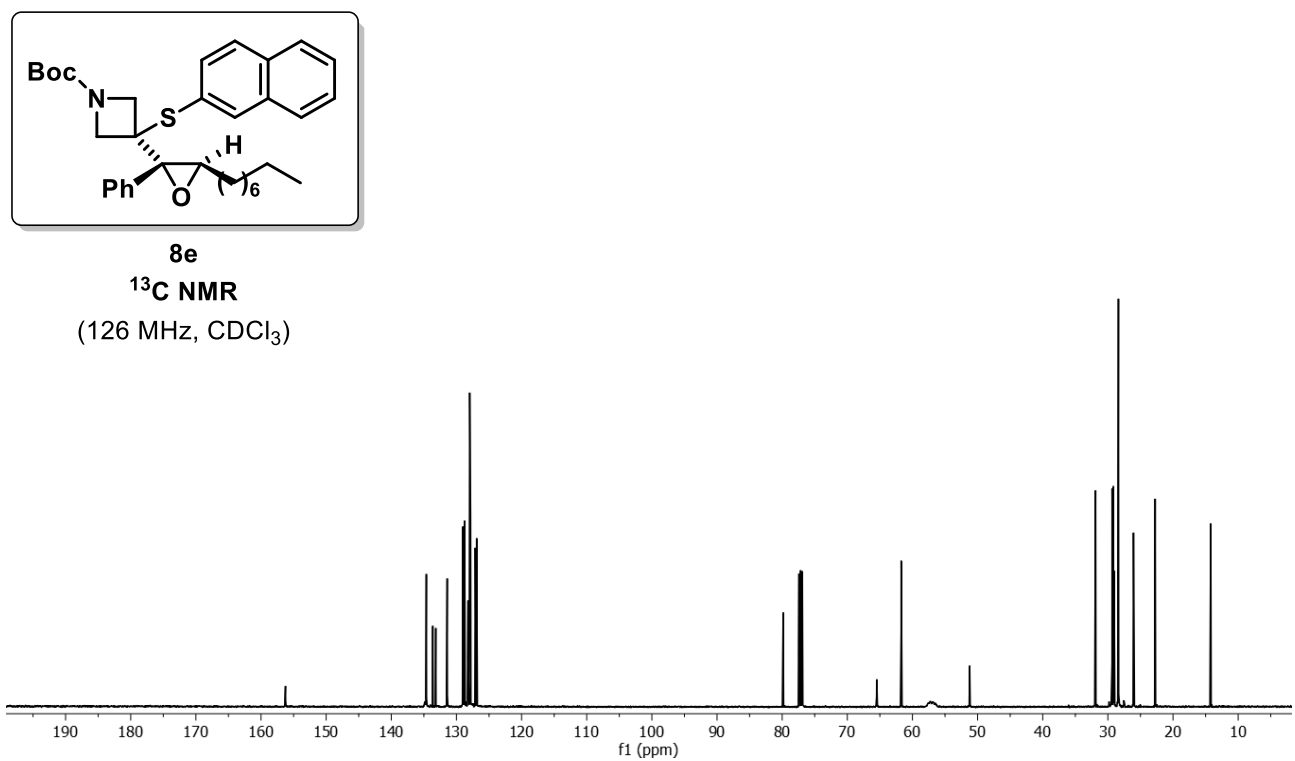

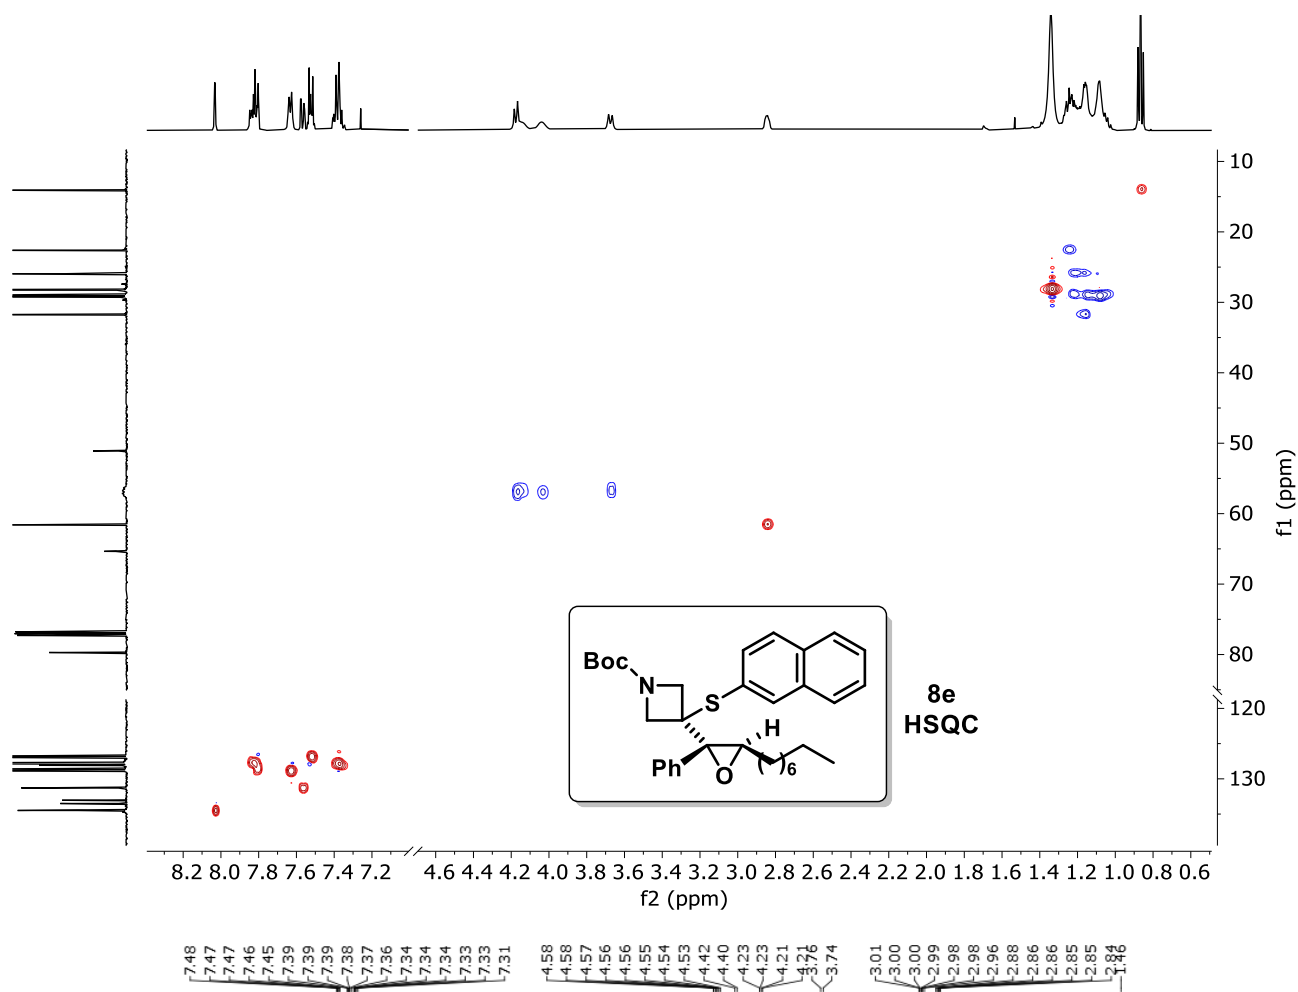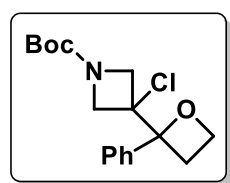

**<sup>1</sup>H NMR**  
(500 MHz, CDCl<sub>3</sub>)

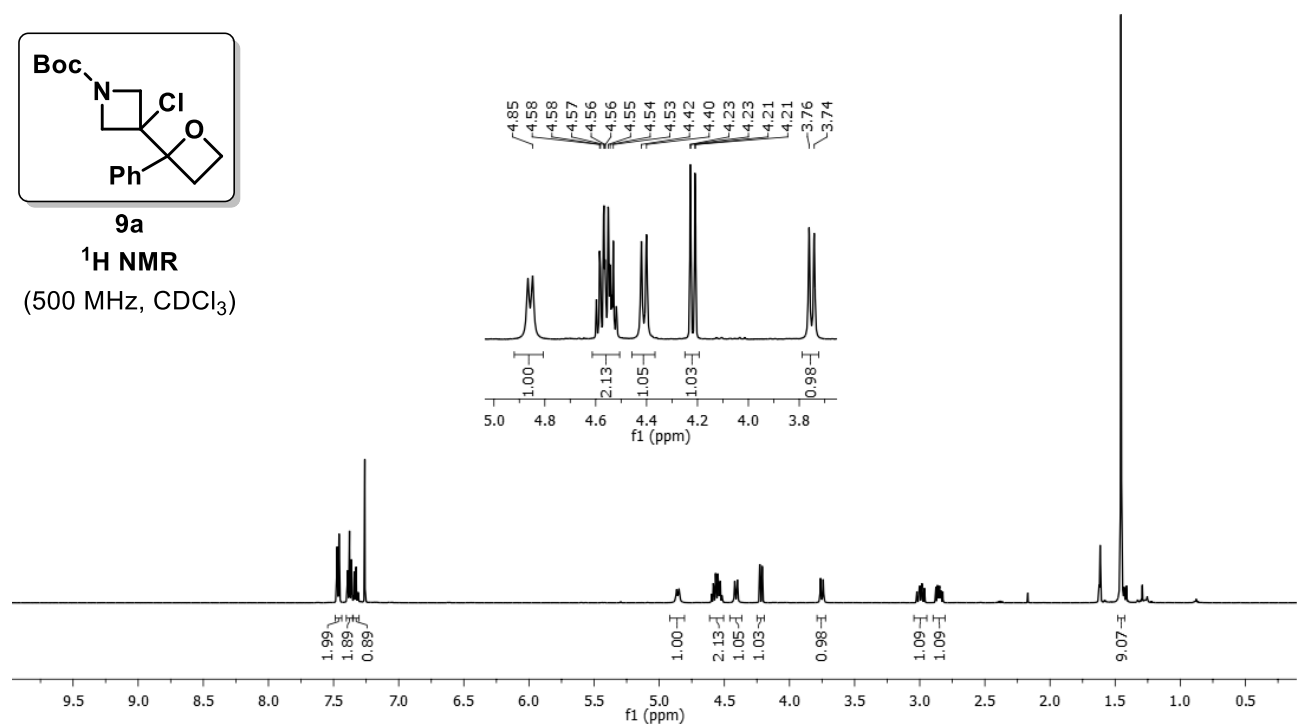



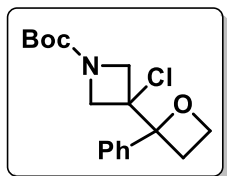

**9a**

**<sup>13</sup>C NMR**

(126 MHz, CDCl<sub>3</sub>)

—156.31      —140.97      {127.96  
127.76  
126.55      —87.06      —80.31      {66.24  
65.25  
60.51  
59.19      {30.58  
28.49

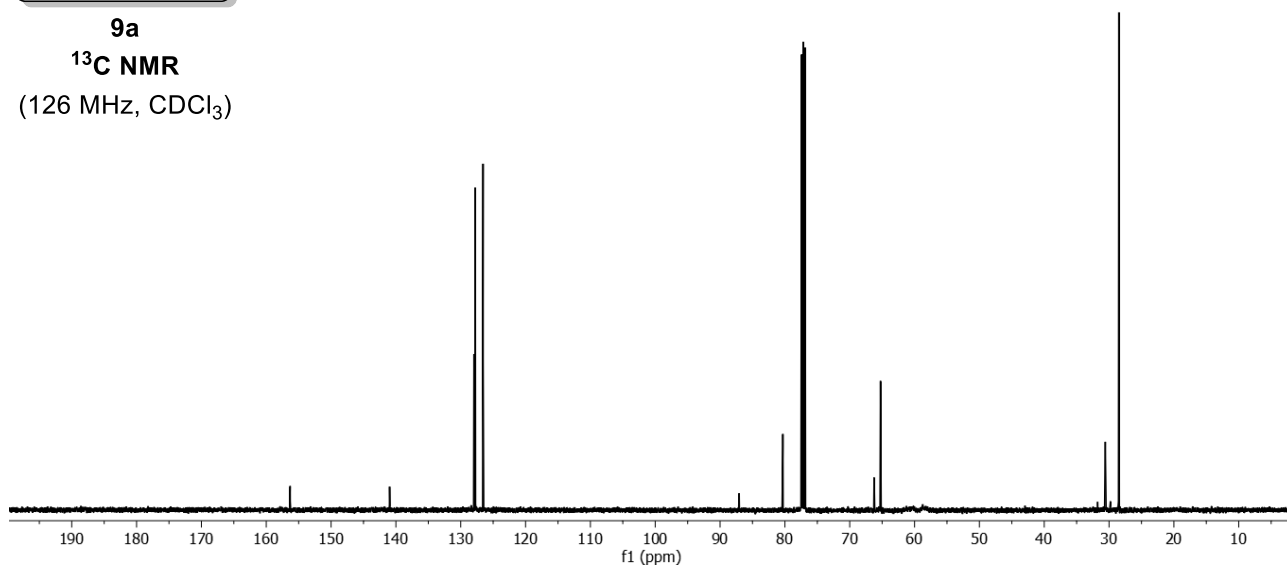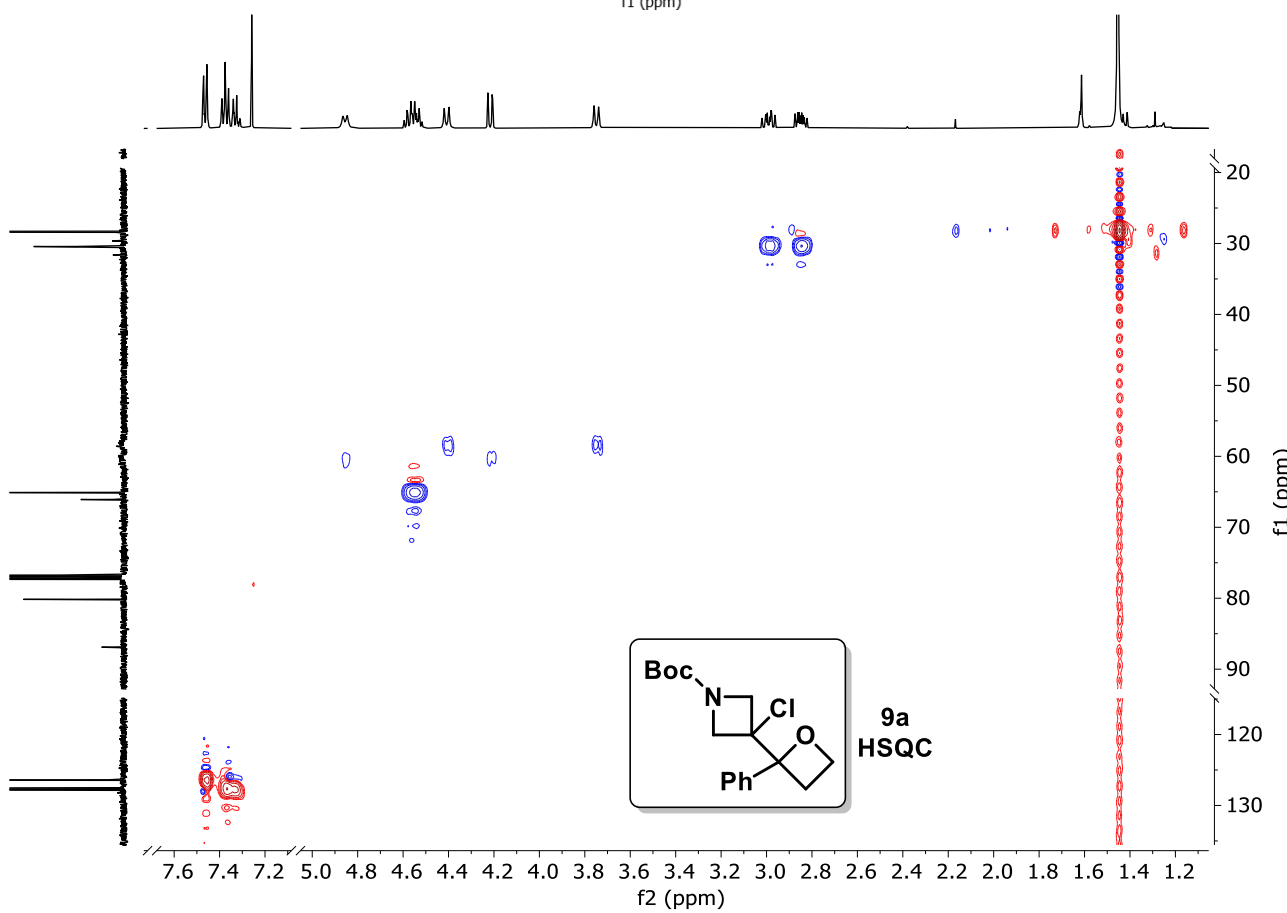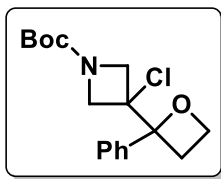

**9a**  
**HSQC**

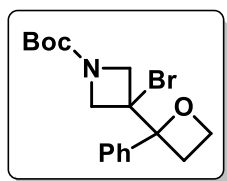

**9b**

**<sup>1</sup>H NMR**  
(500 MHz, CDCl<sub>3</sub>)

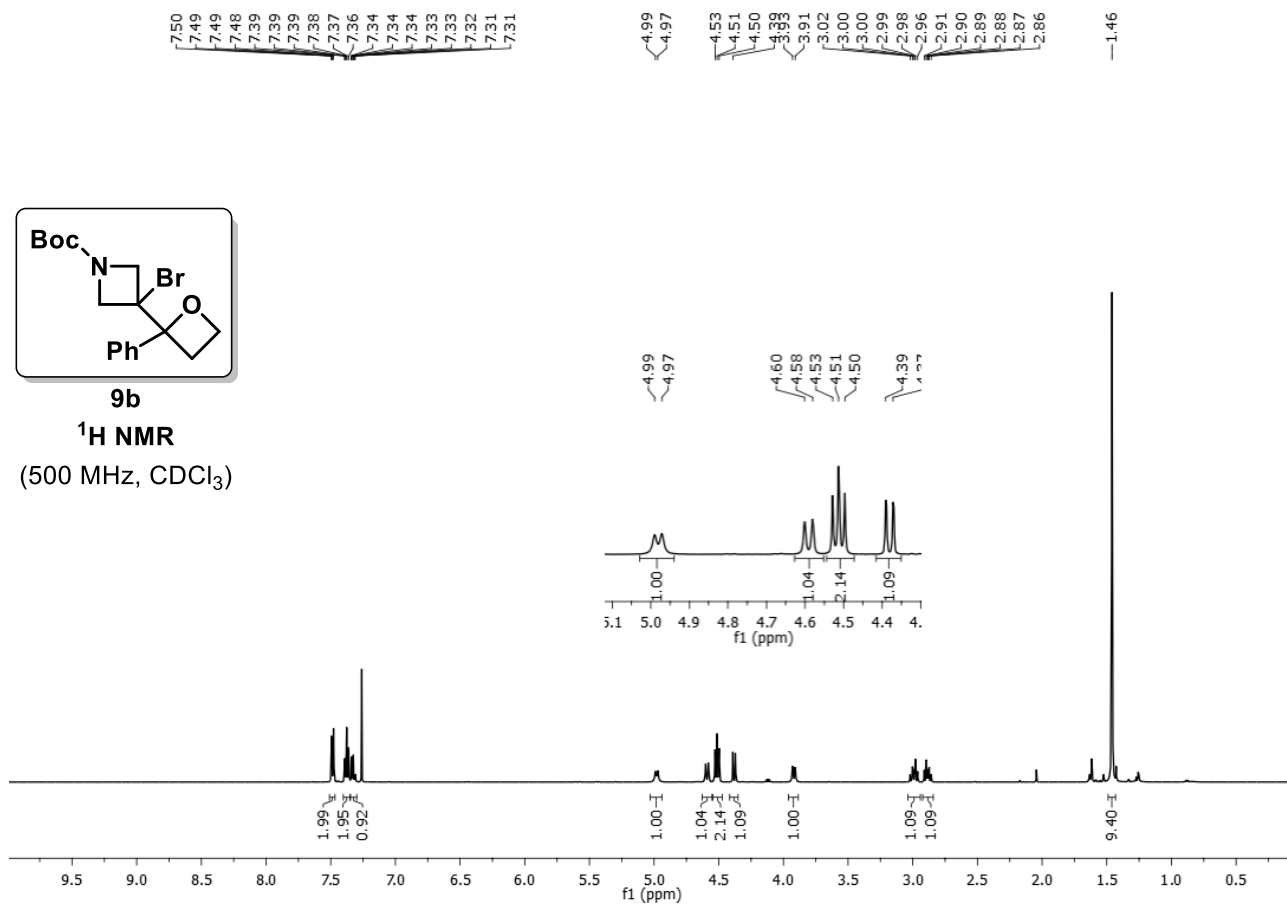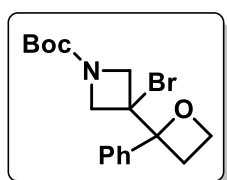

**9b**

**<sup>13</sup>C NMR**  
(126 MHz, CDCl<sub>3</sub>)

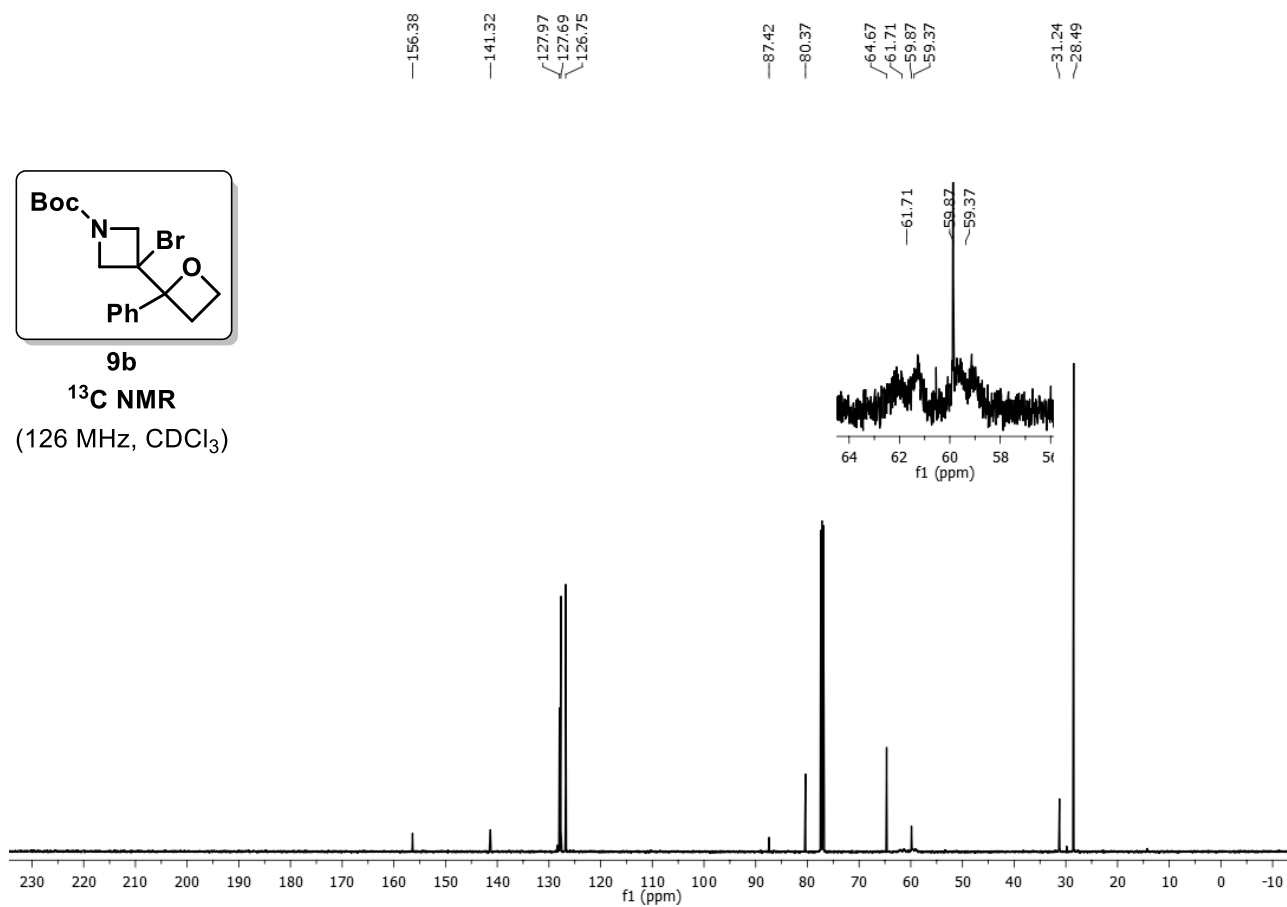

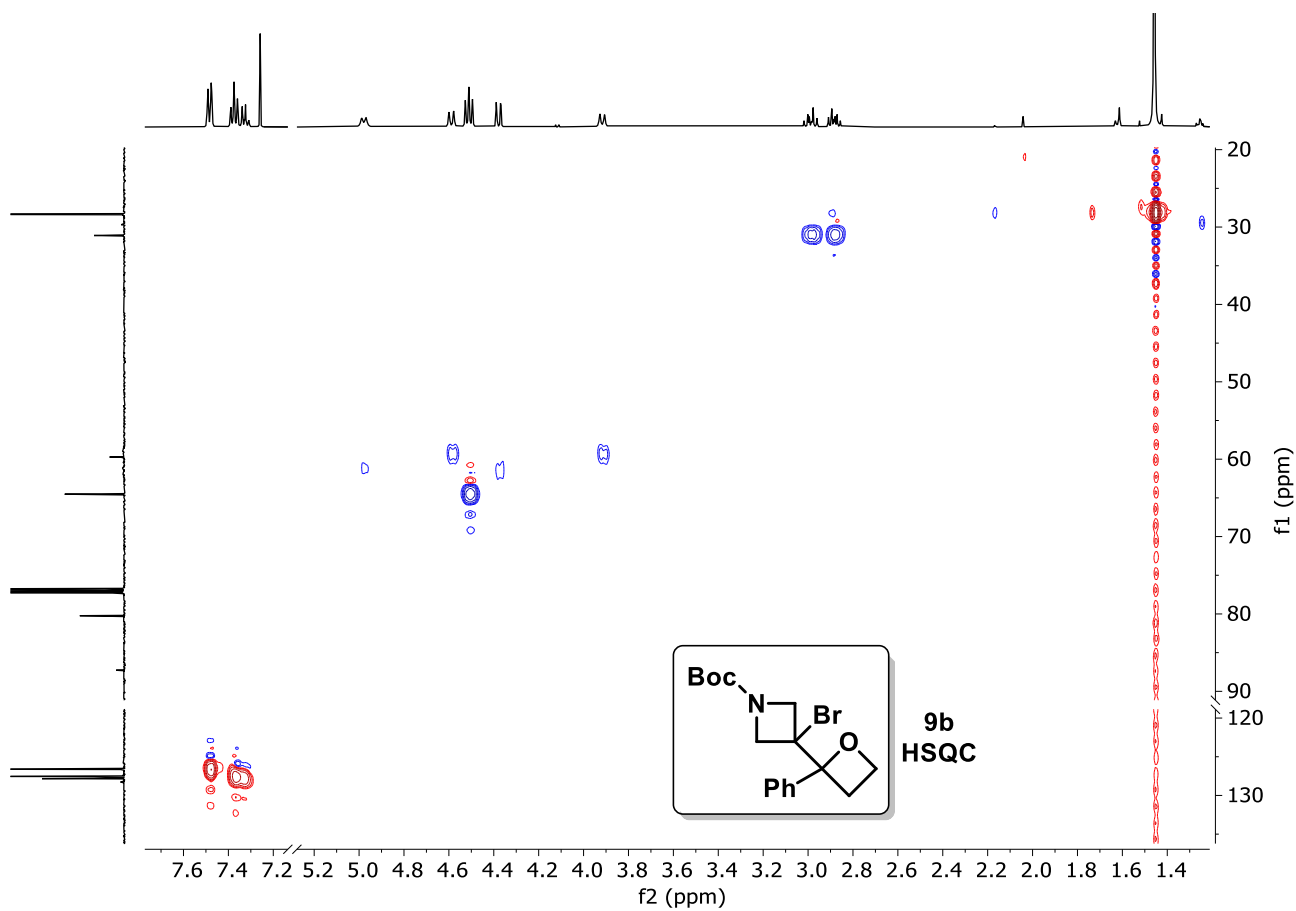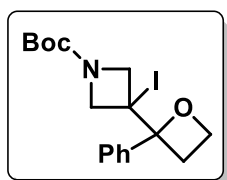

**<sup>1</sup>H NMR**  
(500 MHz, CDCl<sub>3</sub>)

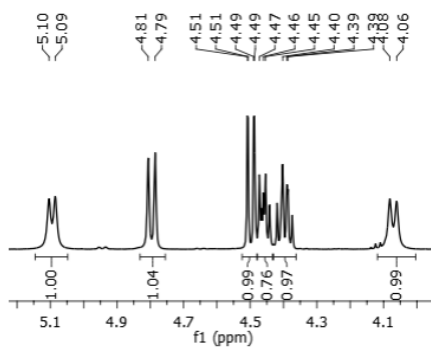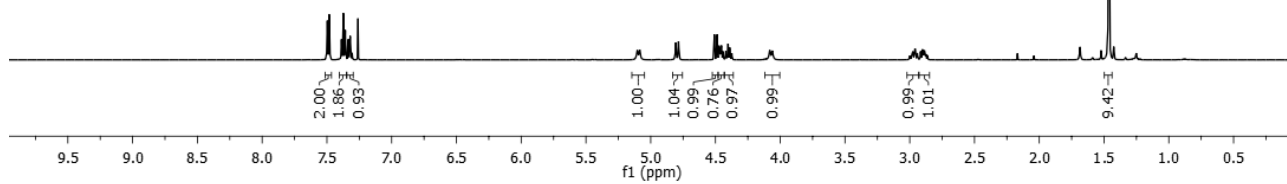

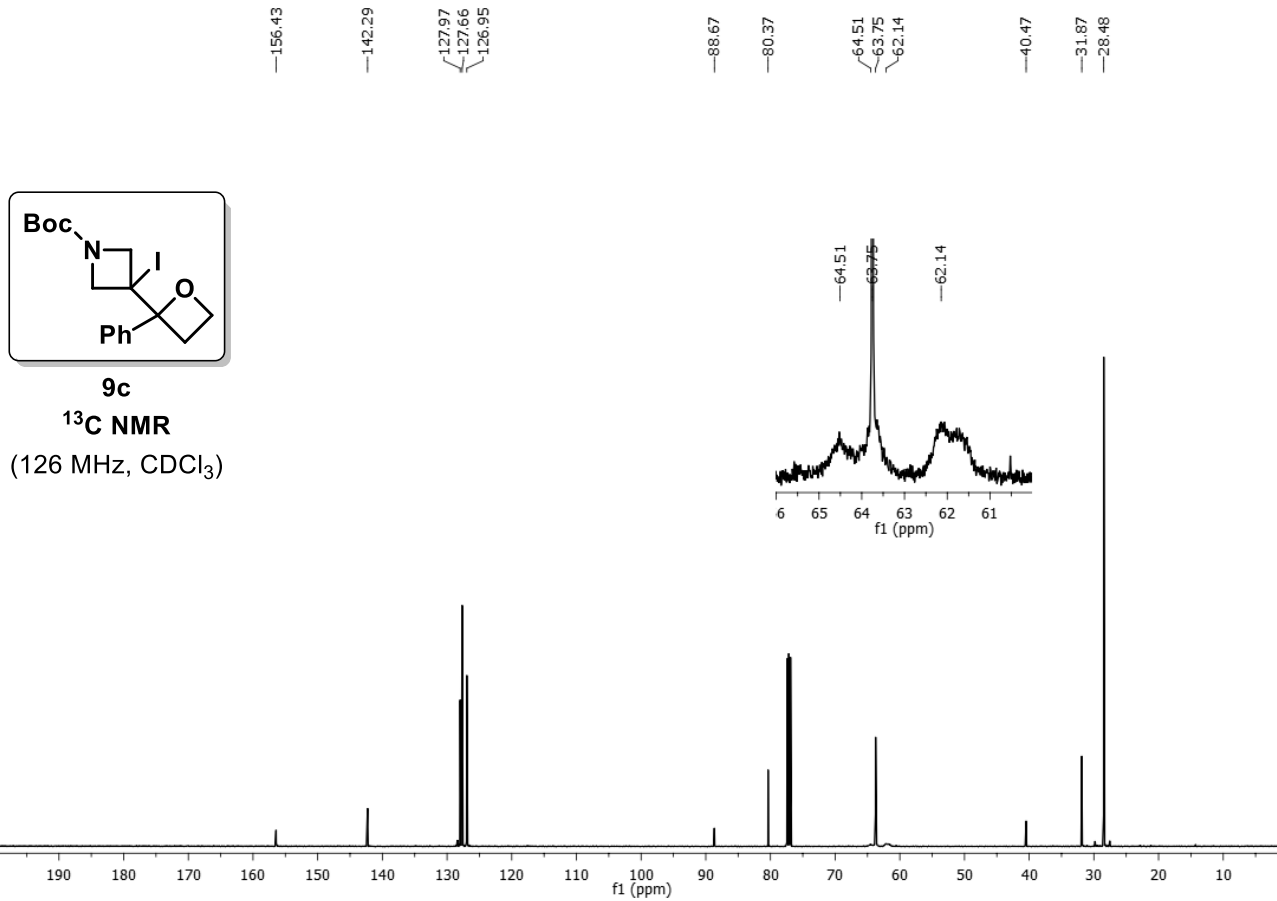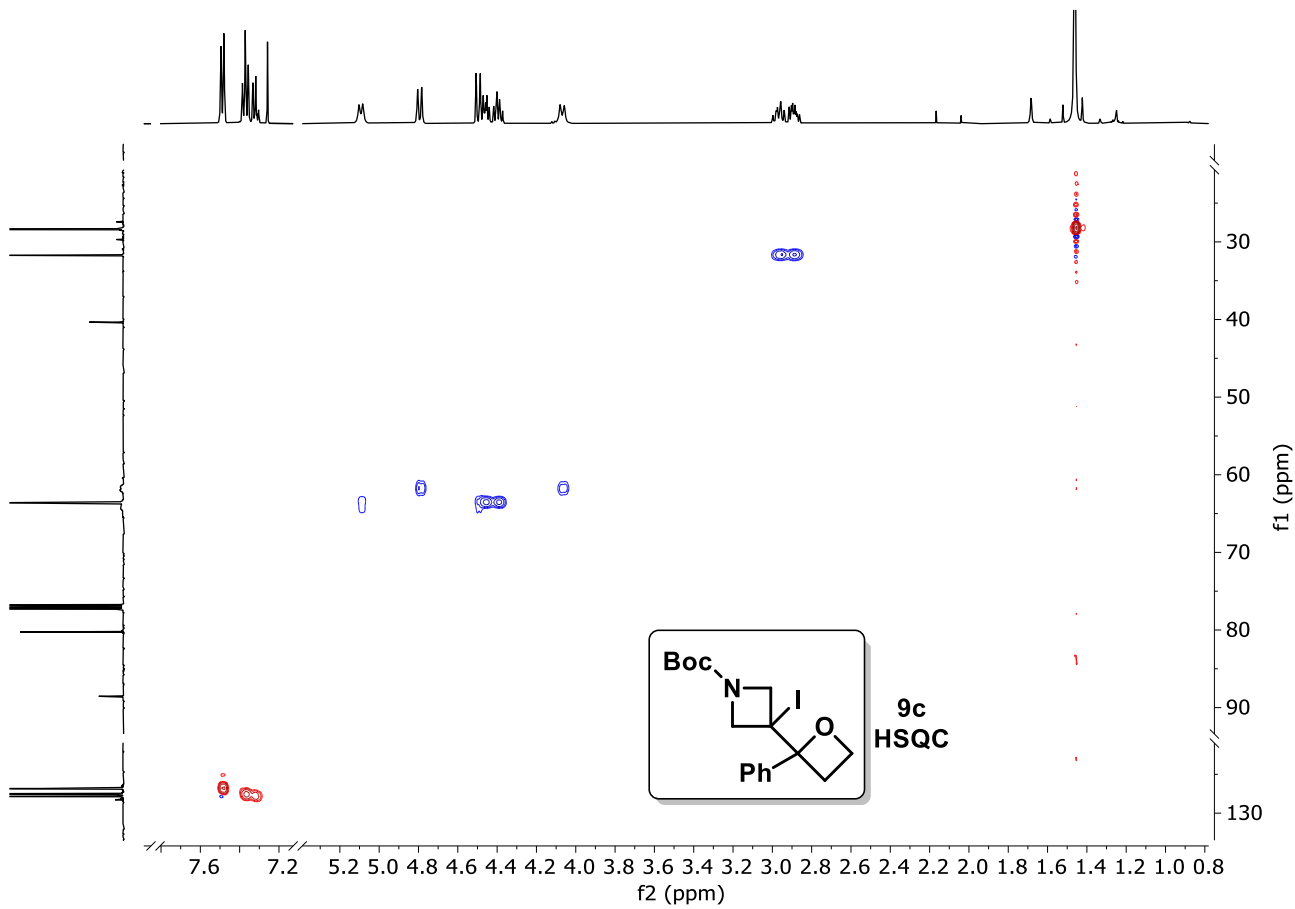

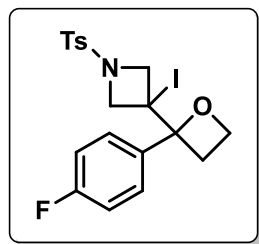

**9d**

**<sup>1</sup>H NMR**

(500 MHz, CDCl<sub>3</sub>)

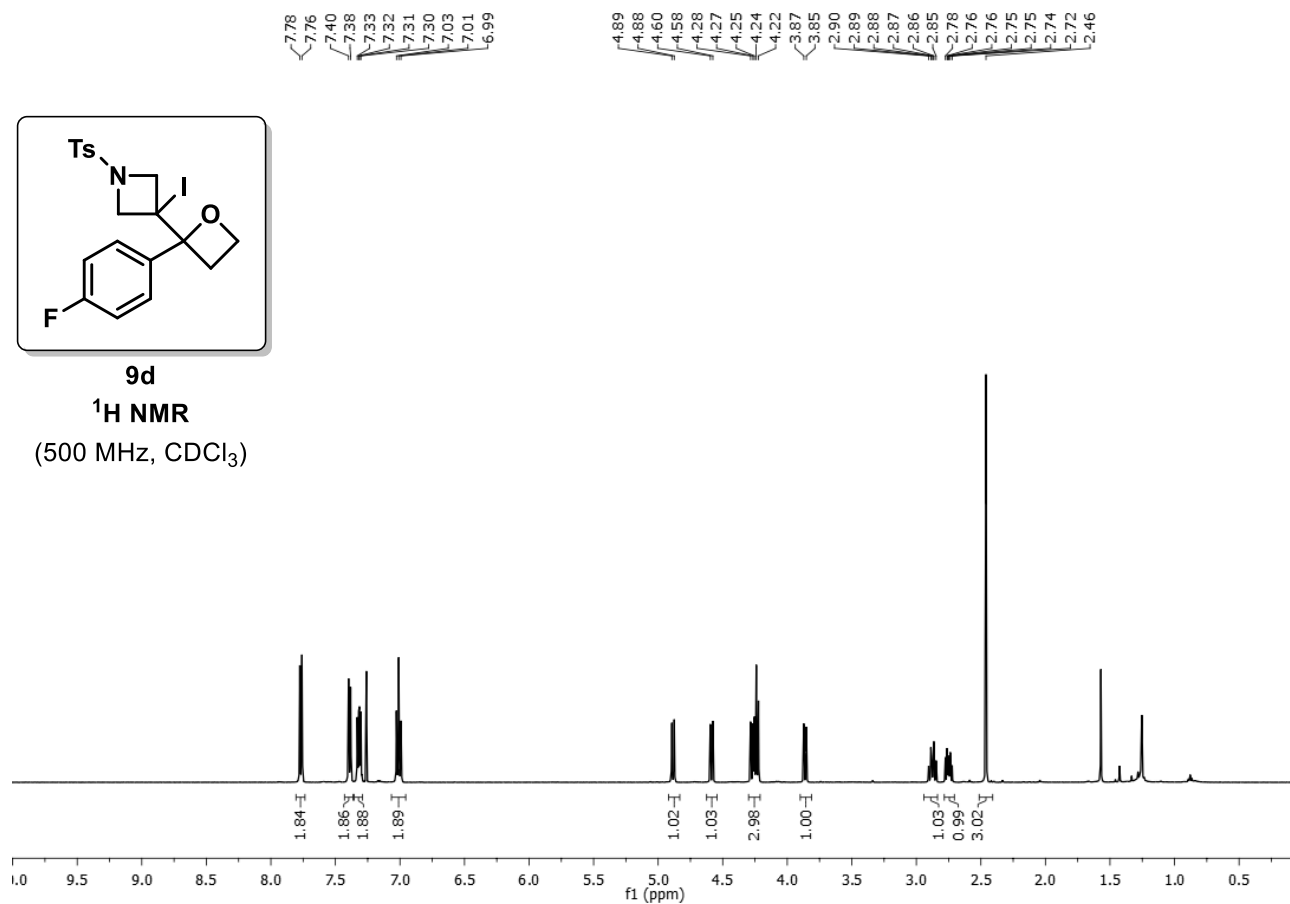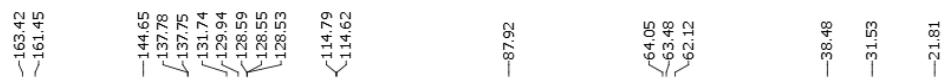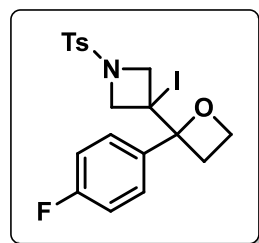

**9d**

**<sup>13</sup>C NMR**

(126 MHz, CDCl<sub>3</sub>)

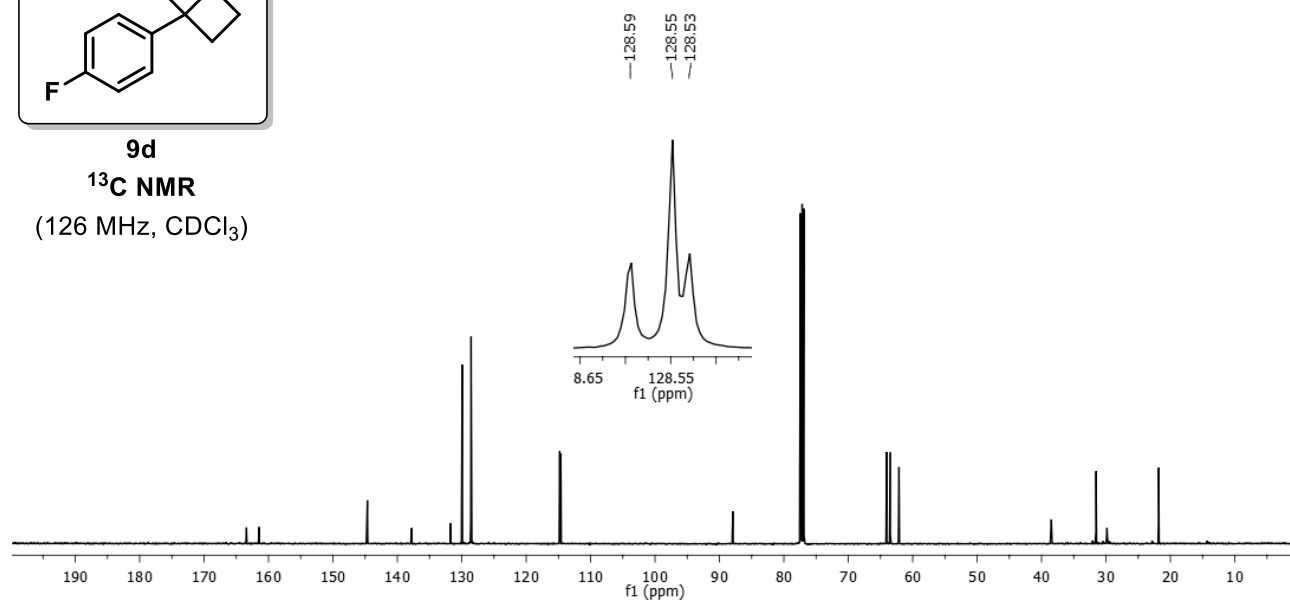

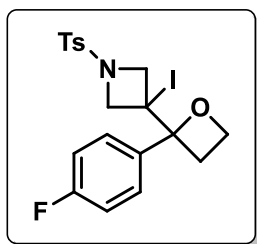

9d

<sup>19</sup>F NMR  
(282 MHz, CDCl<sub>3</sub>)

-113.93  
-113.95  
-113.96  
-113.97  
-113.98  
-113.99  
-114.00  
-114.01  
-114.03

-113.93  
-113.95  
-113.96  
-113.97  
-113.98  
-113.99  
-114.00  
-114.01  
-114.03

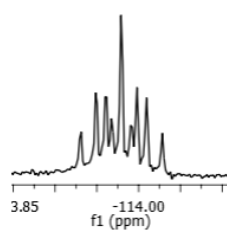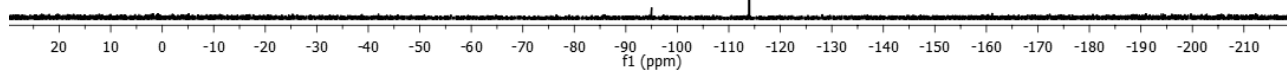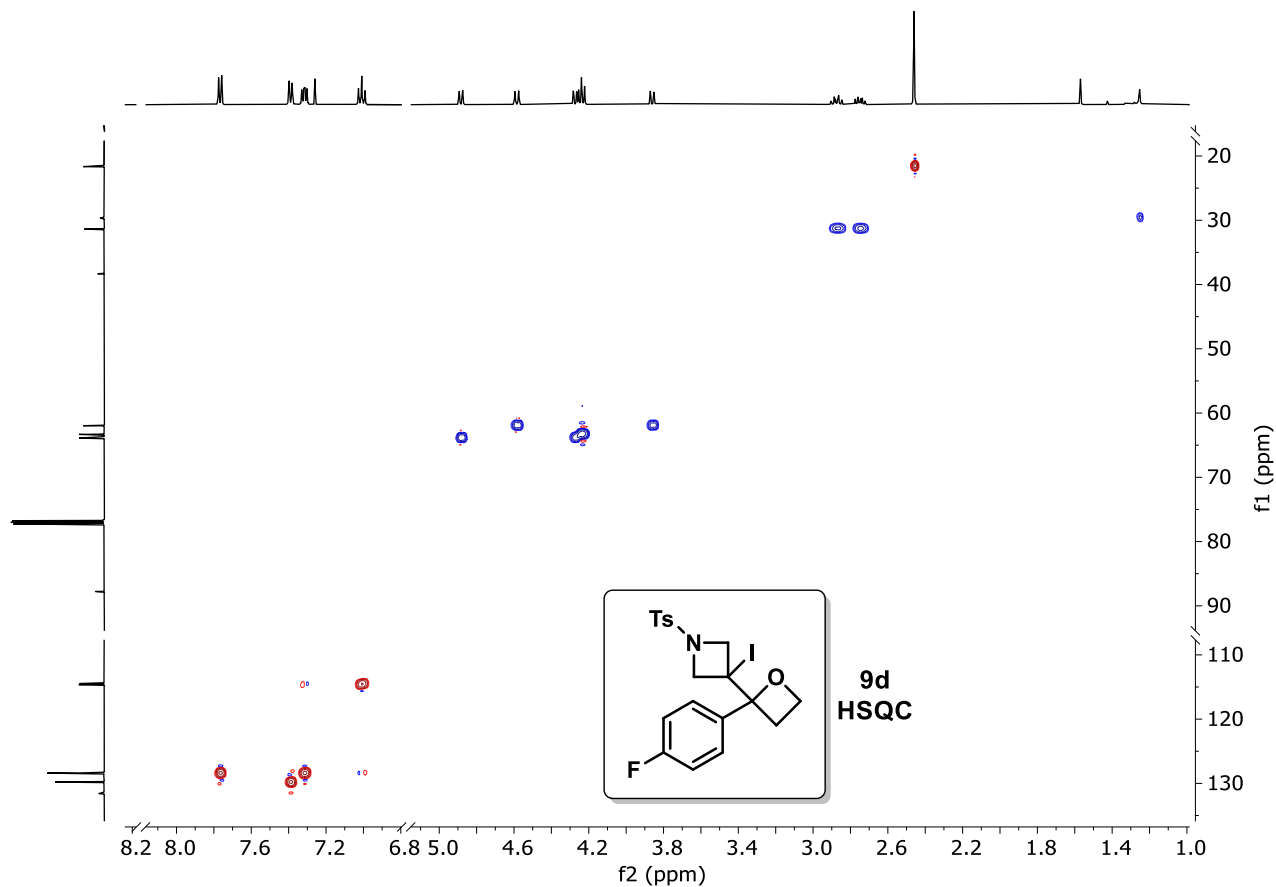

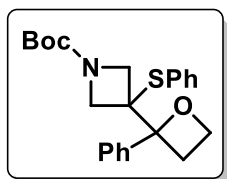

**9e**

**<sup>1</sup>H NMR**  
(500 MHz, CDCl<sub>3</sub>)

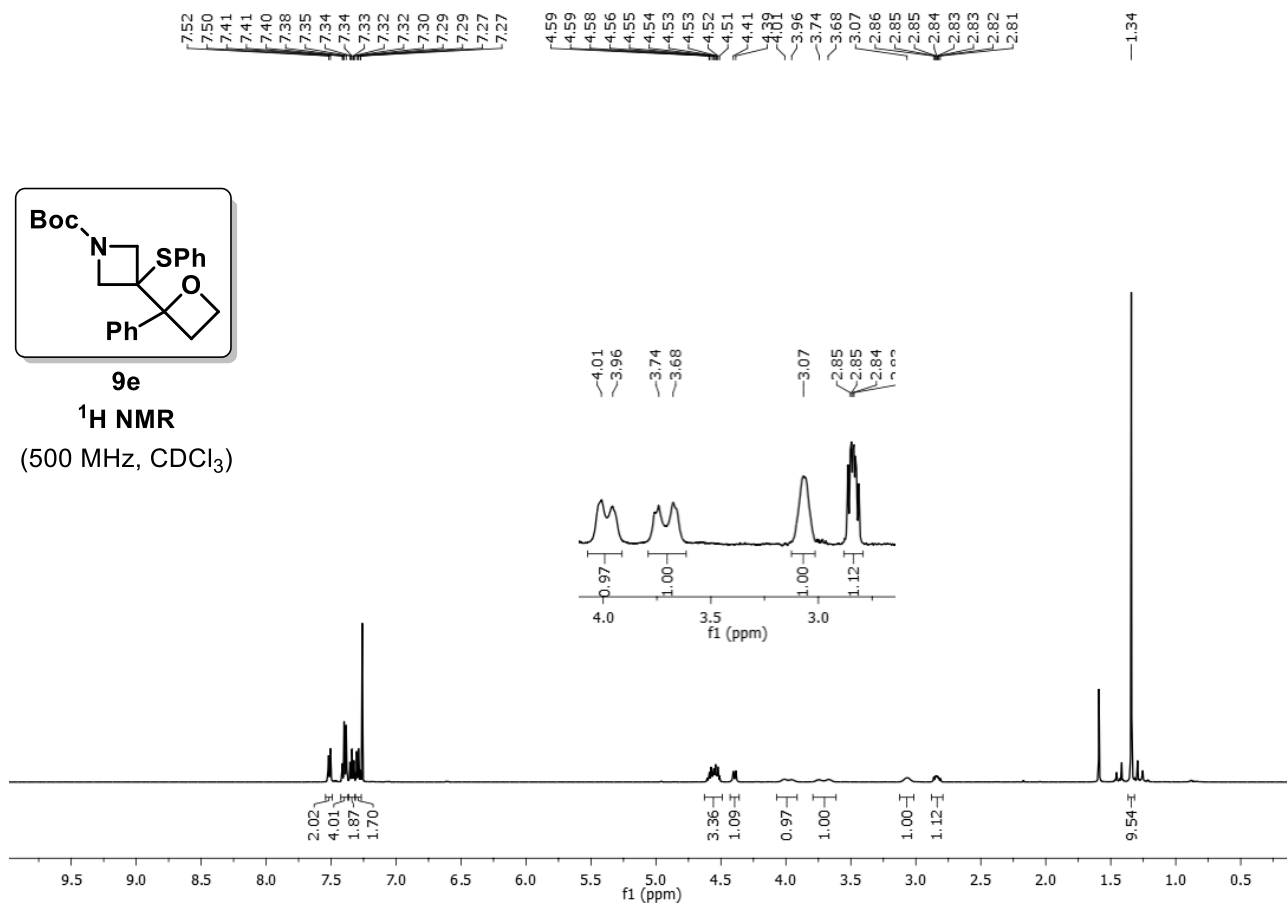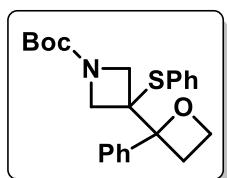

**9e**

**<sup>13</sup>C NMR**  
(126 MHz, CDCl<sub>3</sub>)

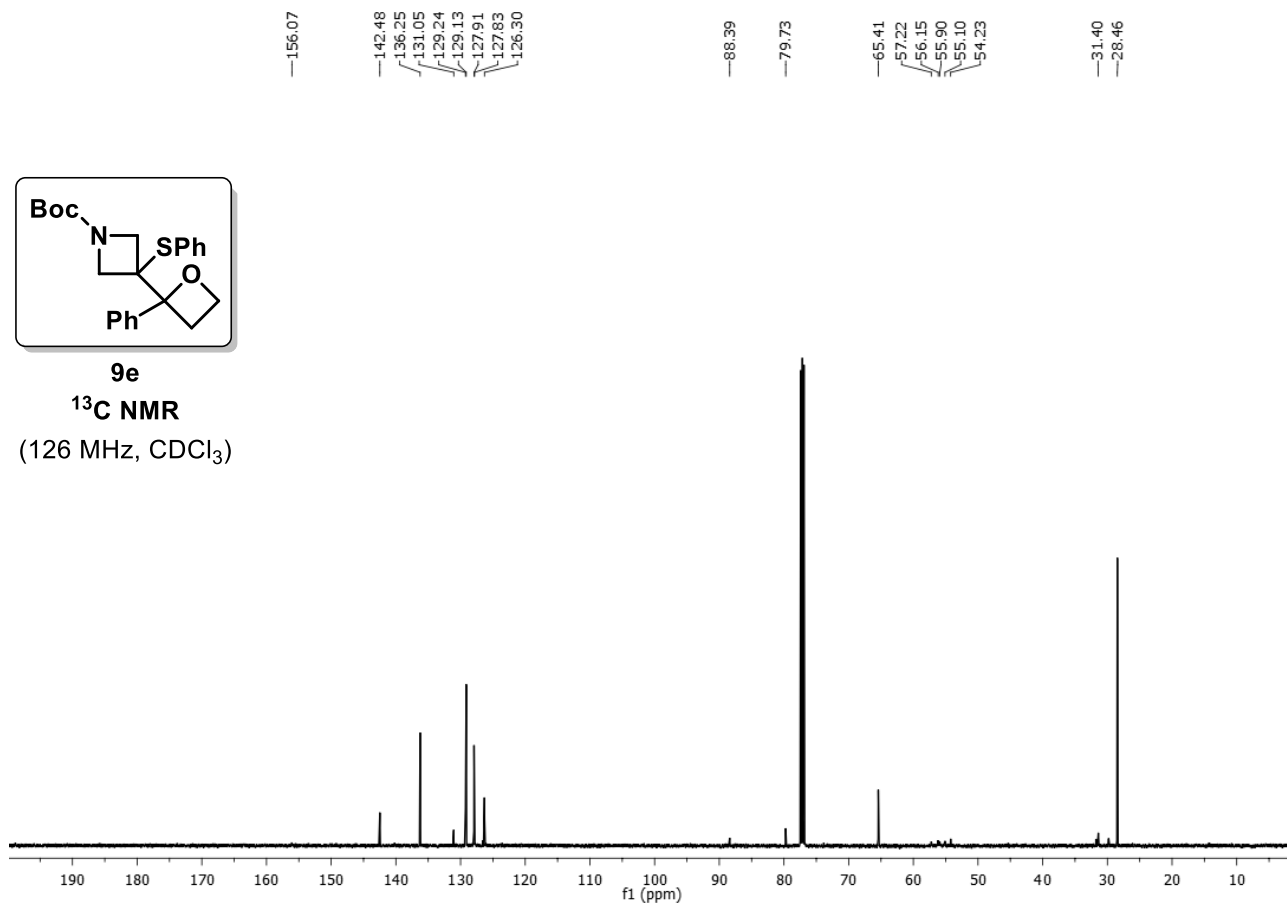

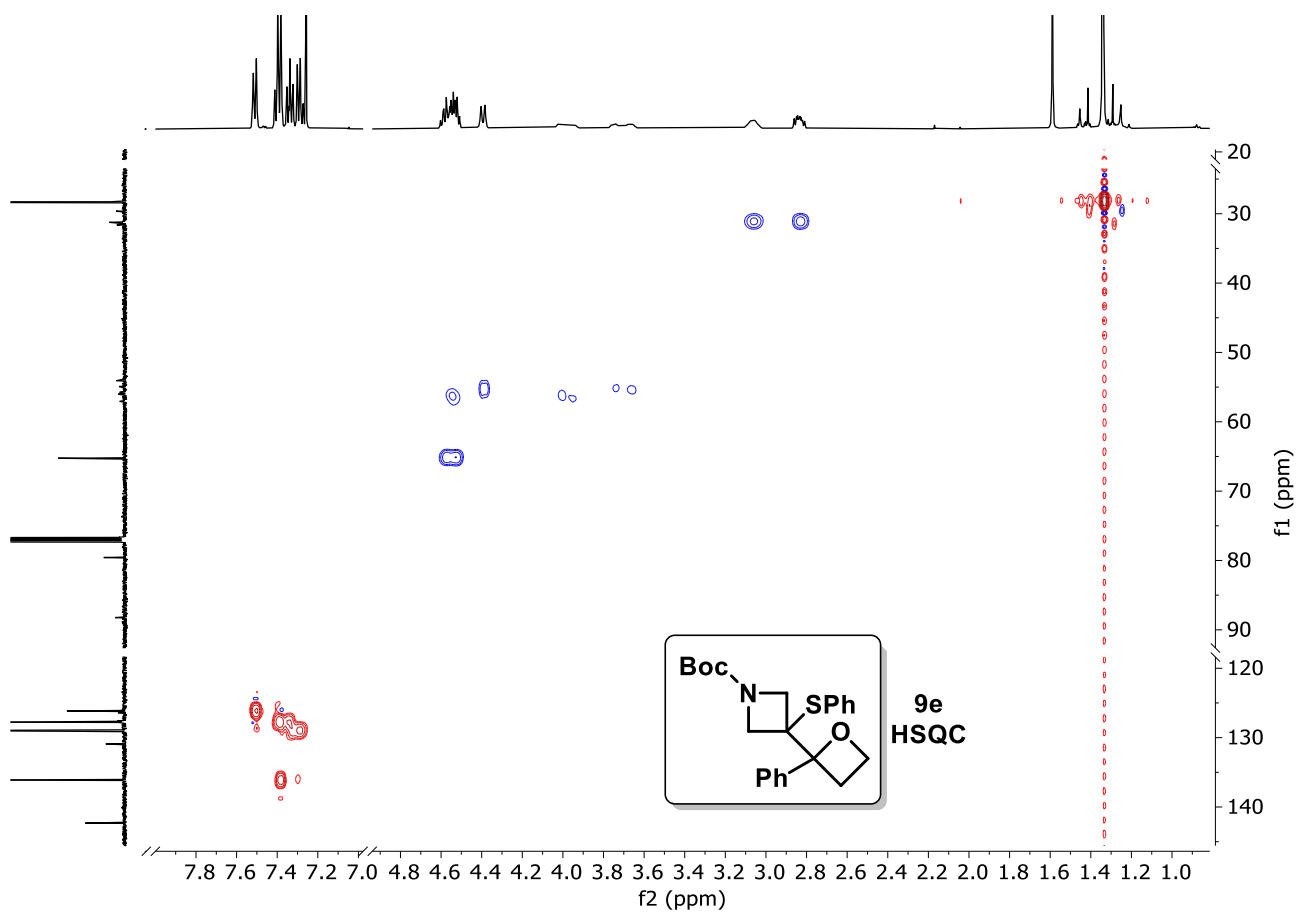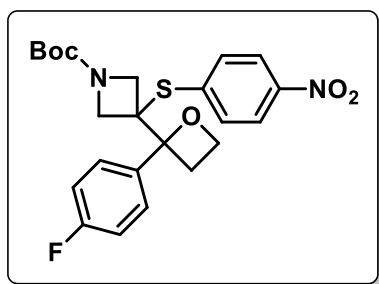

**9f**  
**<sup>1</sup>H NMR**  
 (500 MHz, CDCl<sub>3</sub>)

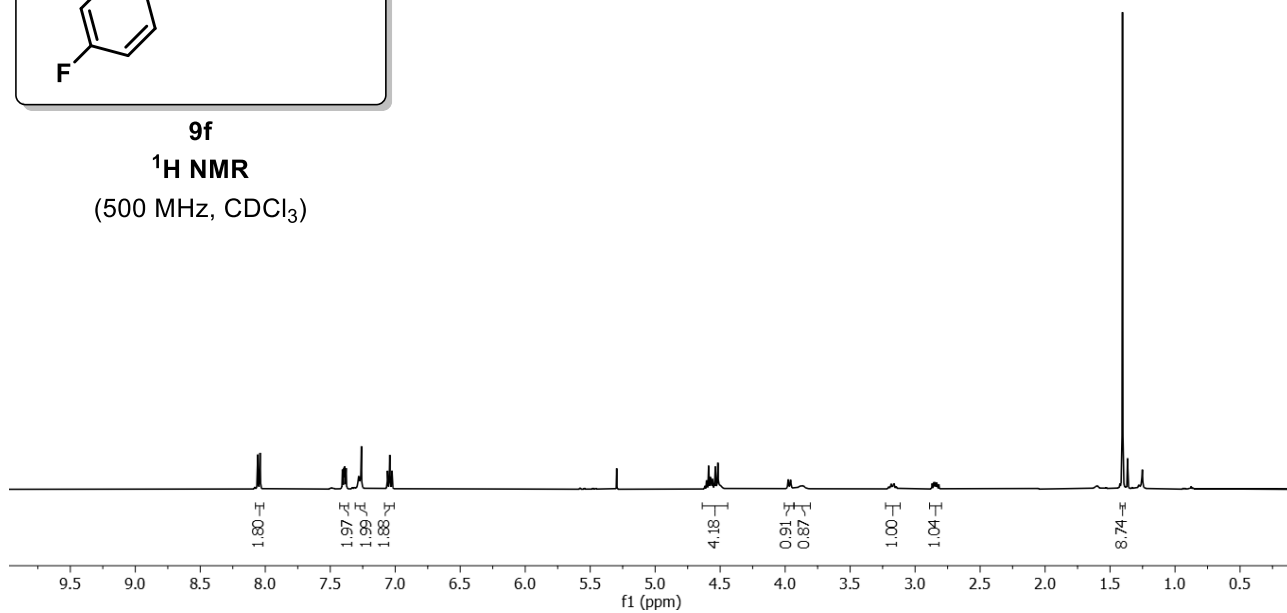



163.53  
 161.56  
 155.92  
 146.81  
 142.25  
 138.26  
 138.24  
 131.72  
 127.85  
 127.78  
 123.84  
 115.28  
 115.11  
 88.52  
 80.55  
 65.32  
 57.04  
 55.60  
 54.07  
 31.47  
 28.45

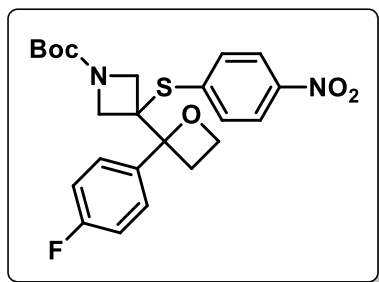

**9f**

**<sup>13</sup>C NMR**  
(126 MHz, CDCl<sub>3</sub>)

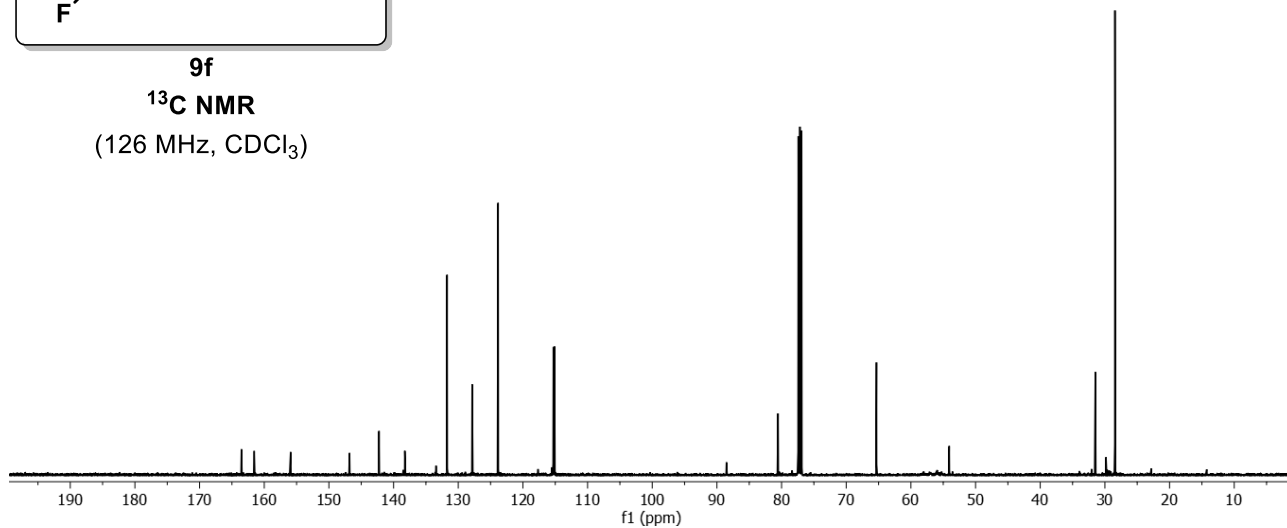

113.86  
 113.88  
 113.90  
 113.91  
 113.93  
 113.94  
 113.96

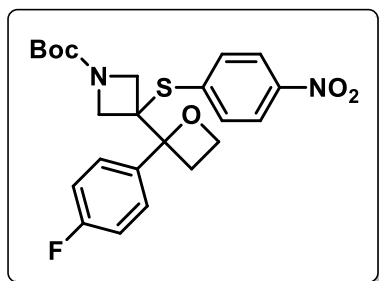

**9f**

**<sup>19</sup>F NMR**  
(282 MHz, CDCl<sub>3</sub>)

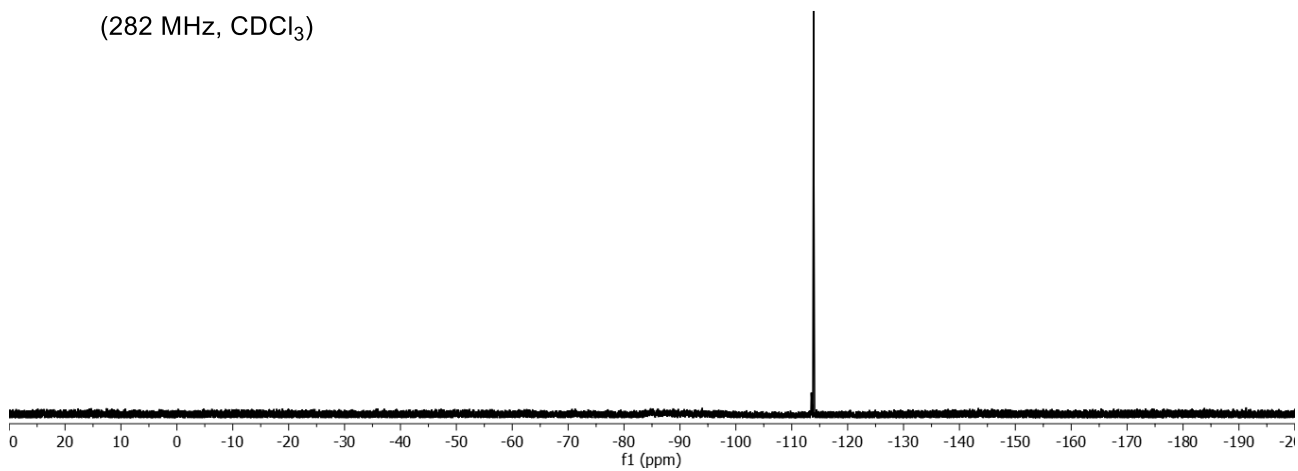

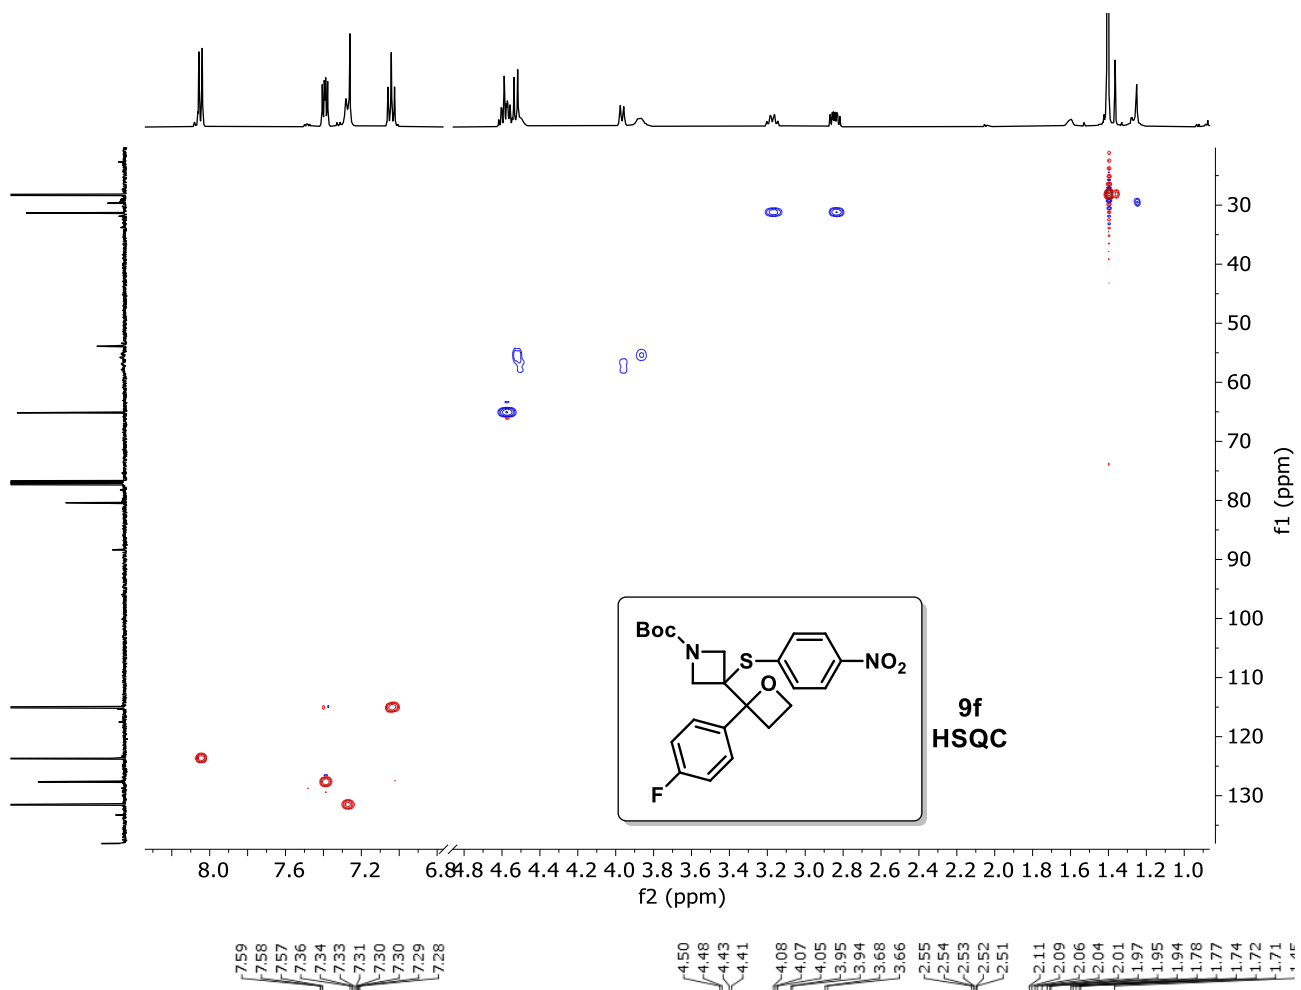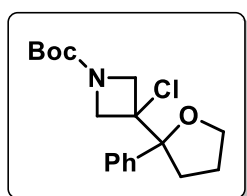

**10a**  
<sup>1</sup>H NMR  
 (500 MHz, CDCl<sub>3</sub>)

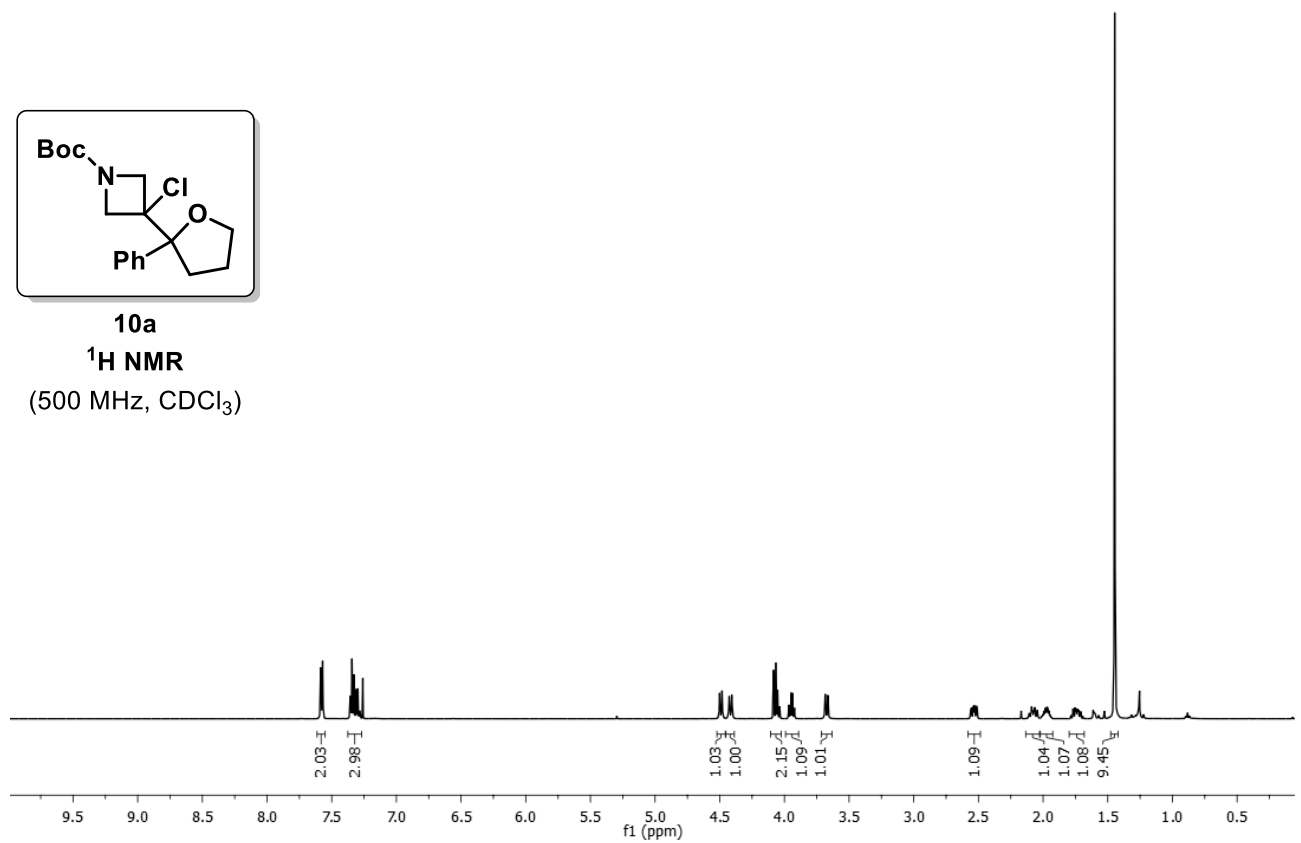

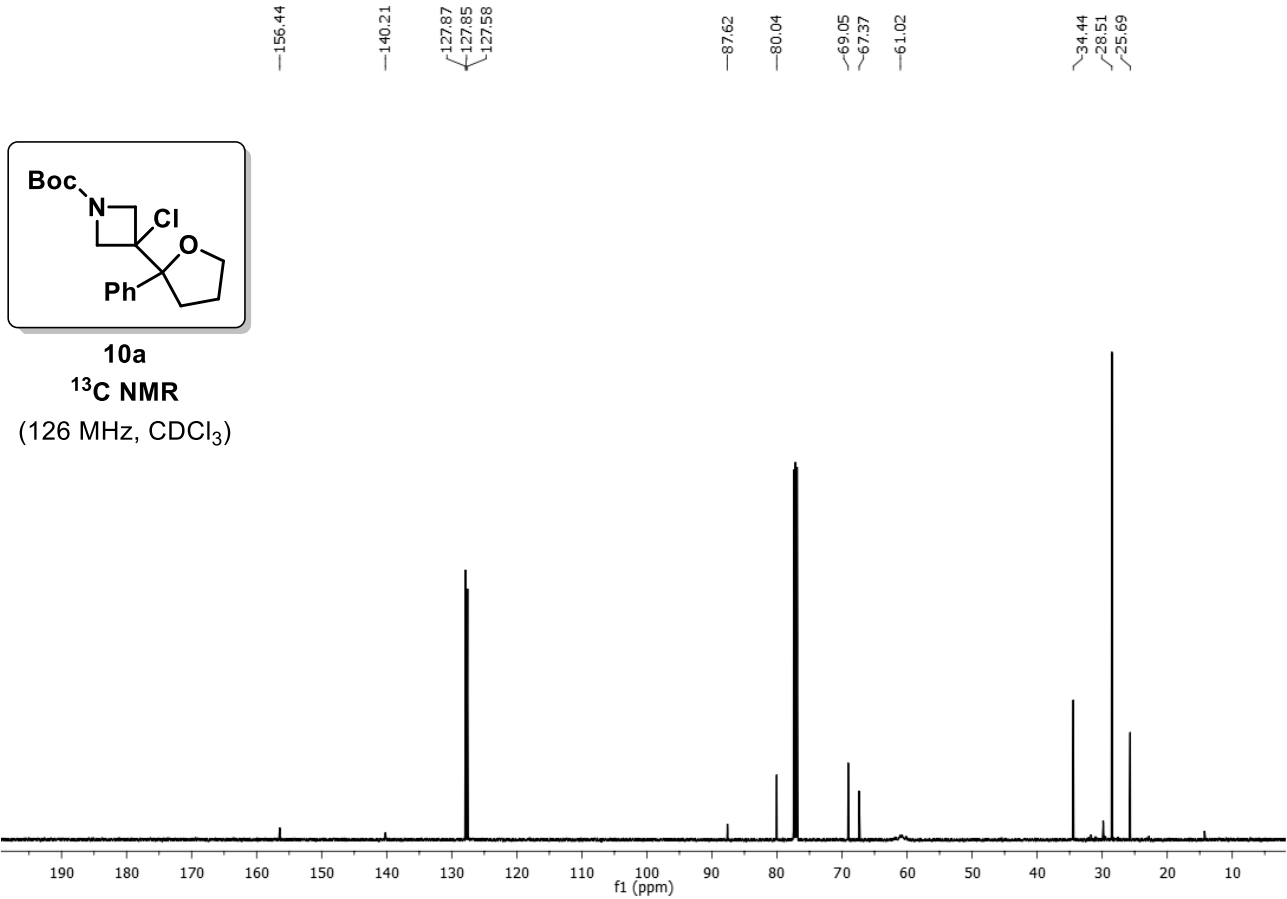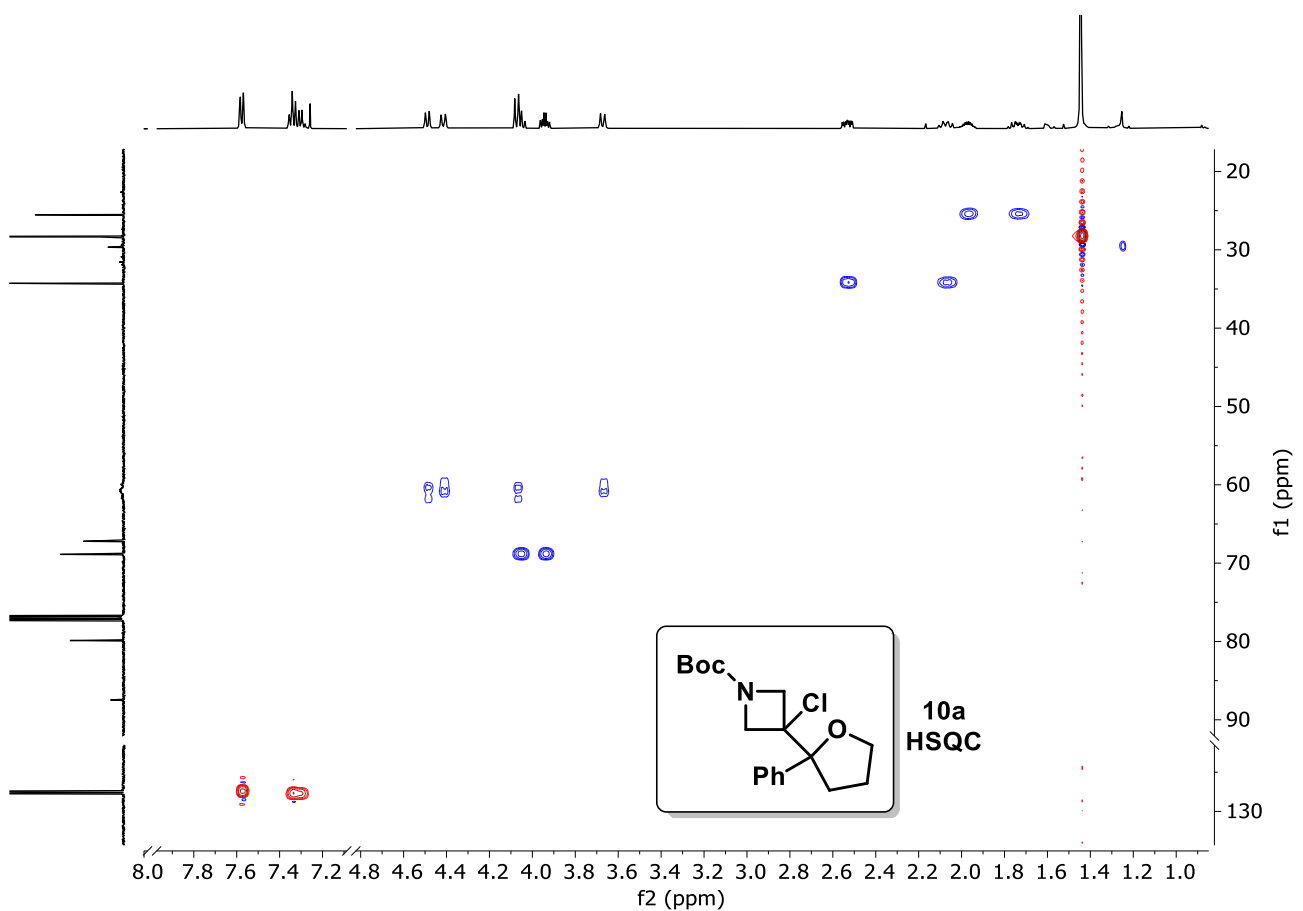

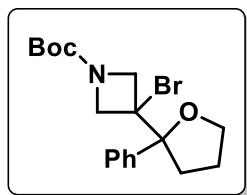

**10b**

**<sup>1</sup>H NMR**

(500 MHz, CDCl<sub>3</sub>)

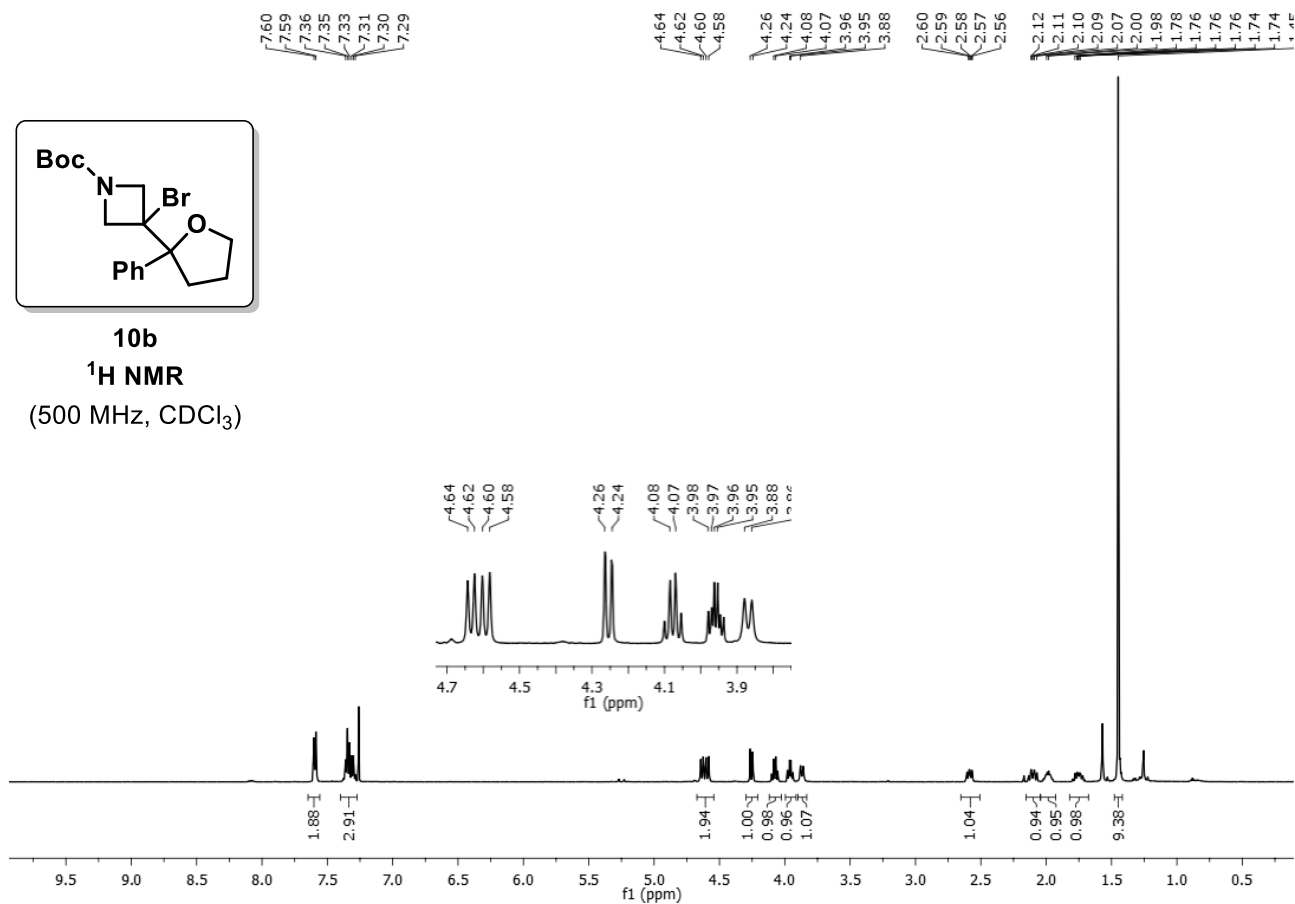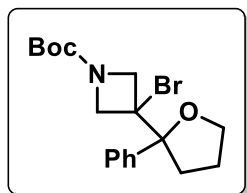

**10b**

**<sup>13</sup>C NMR**

(126 MHz, CDCl<sub>3</sub>)

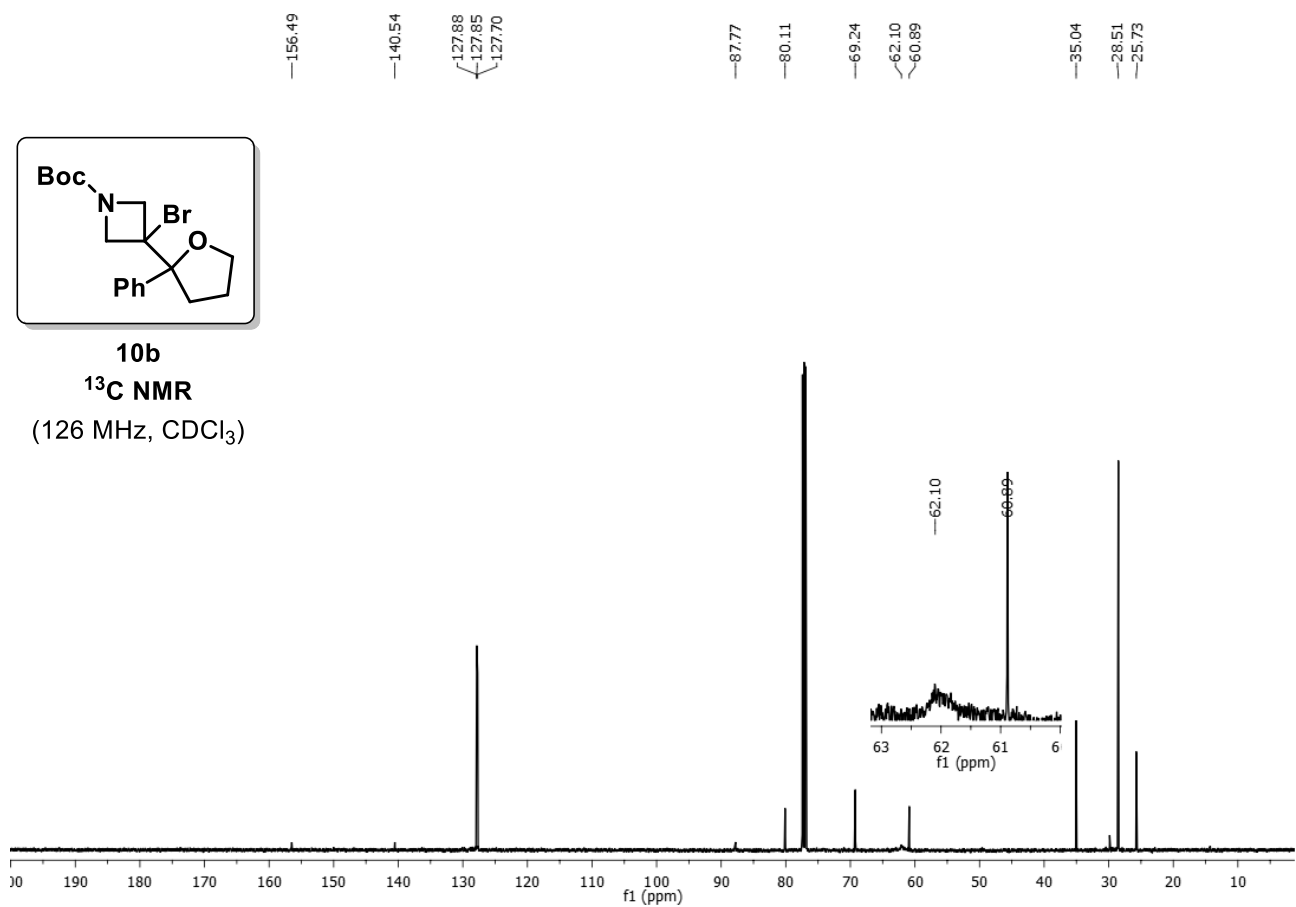

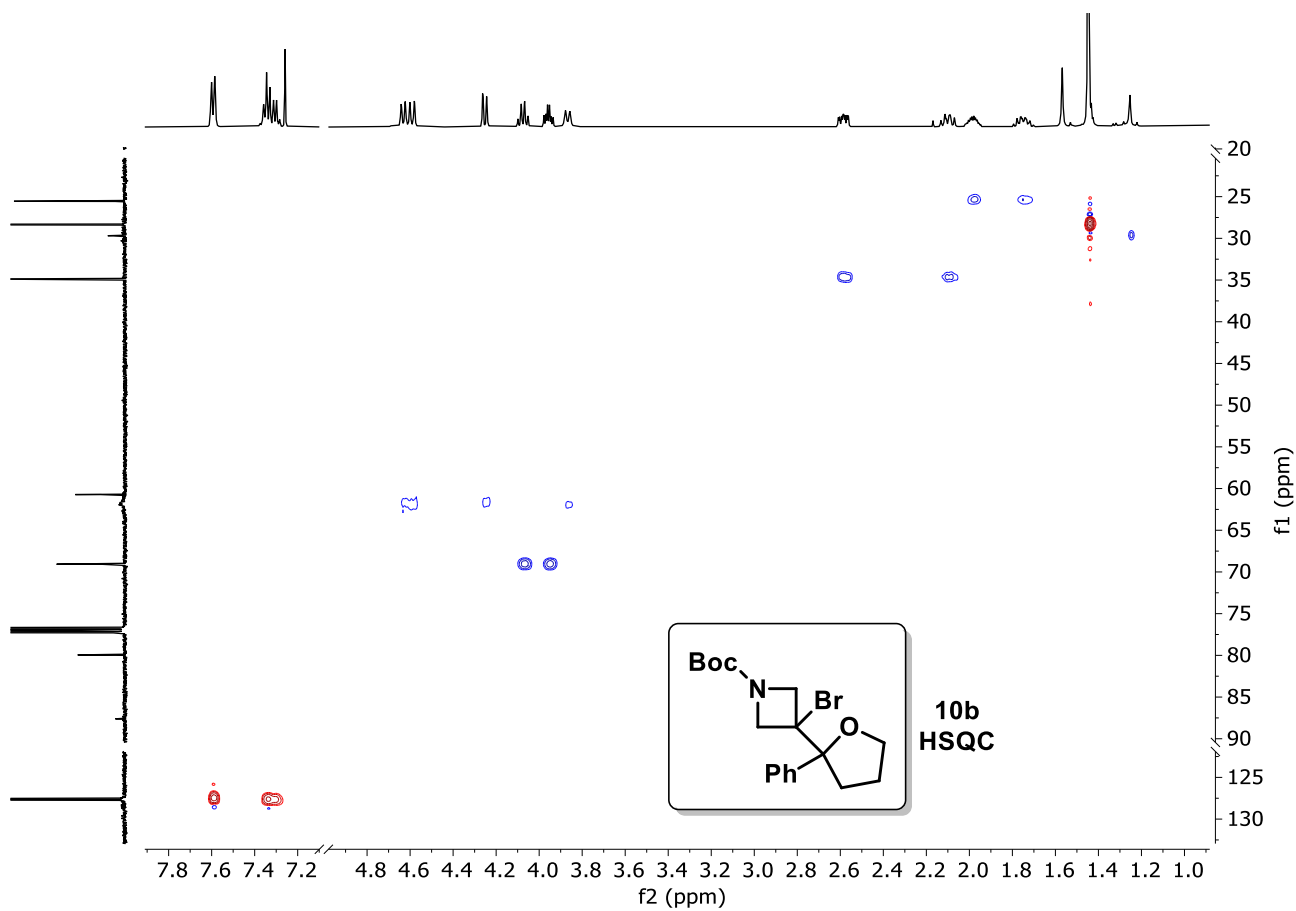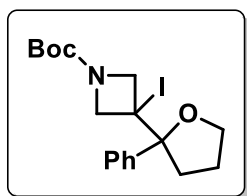

**10c**  
**<sup>1</sup>H NMR**  
(500 MHz, CDCl<sub>3</sub>)

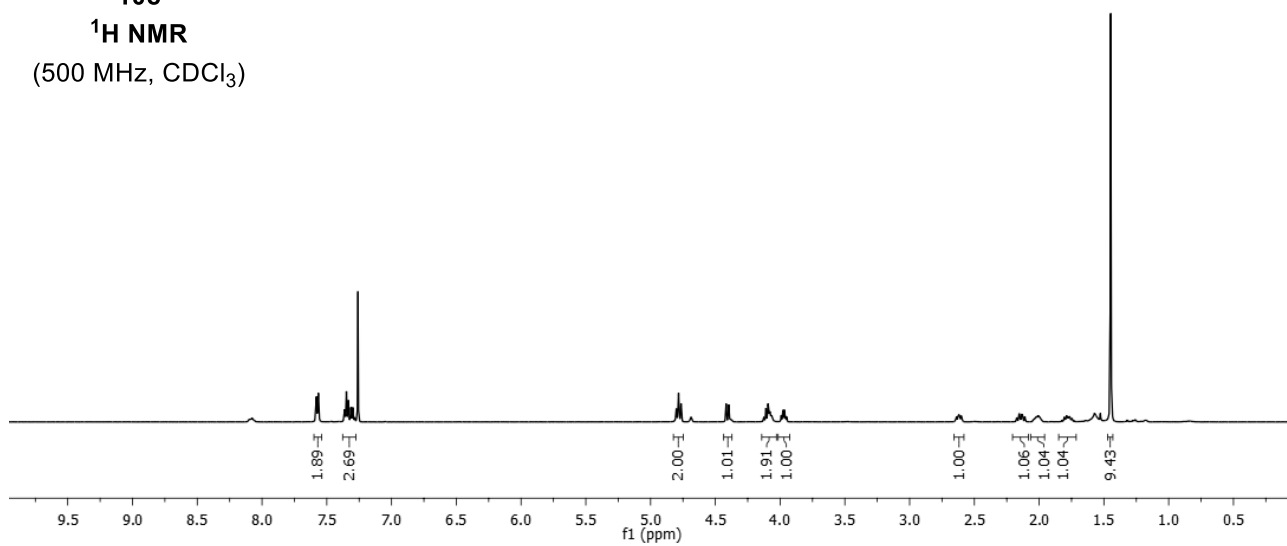

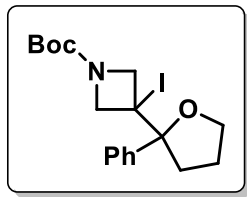

**10c**  
<sup>13</sup>C NMR  
 (126 MHz, CDCl<sub>3</sub>)

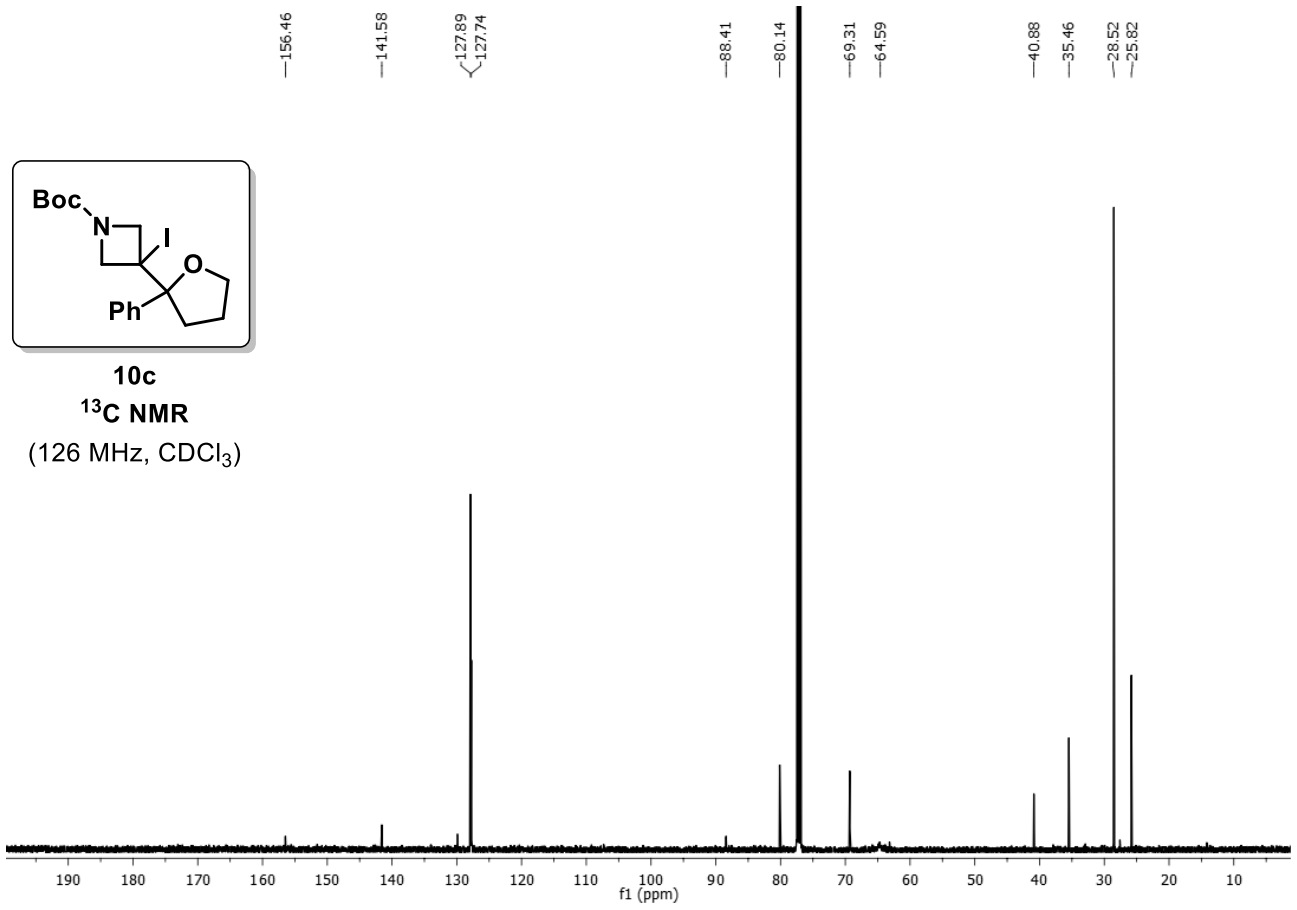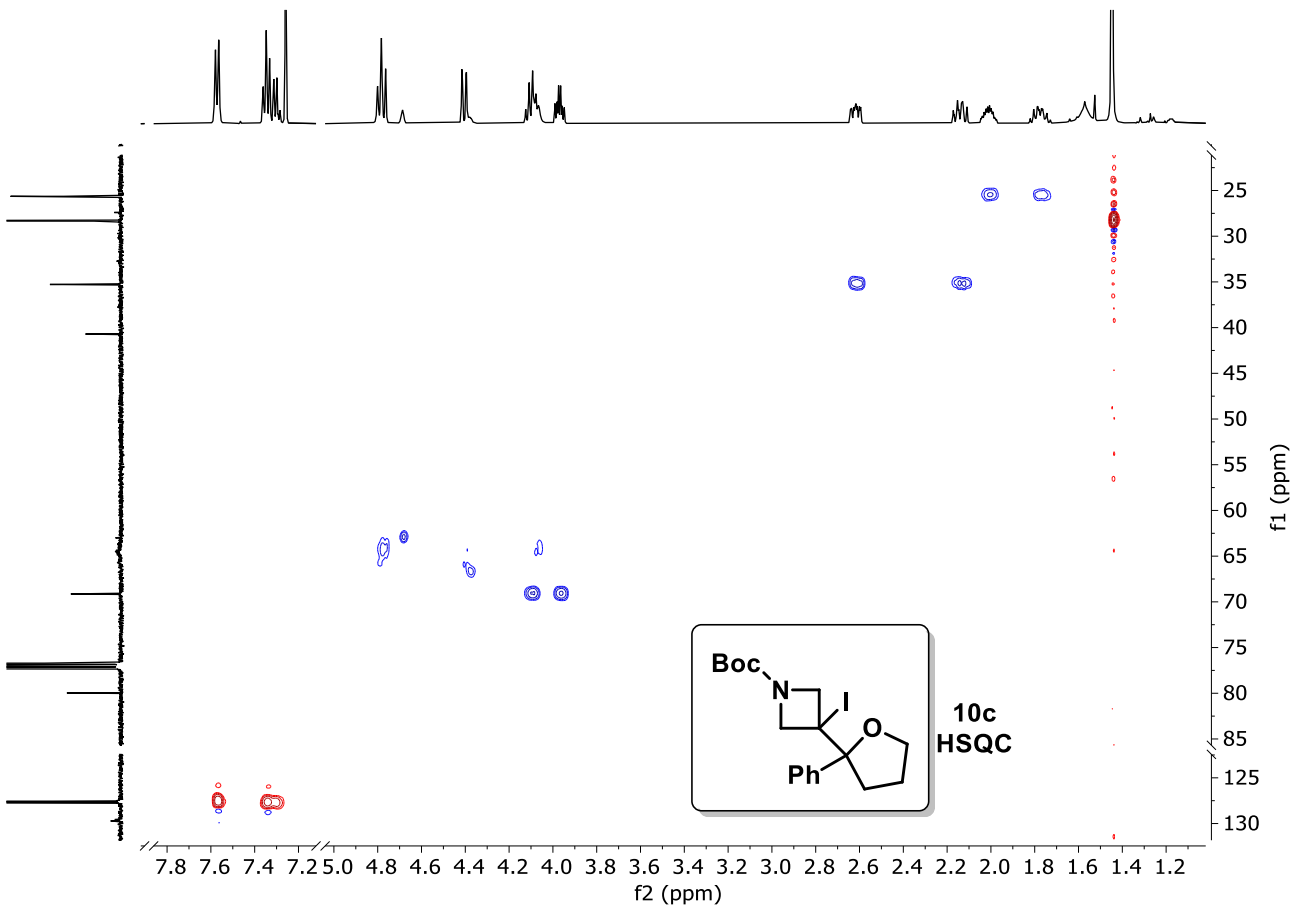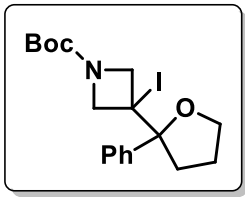

**10c**  
 HSQC

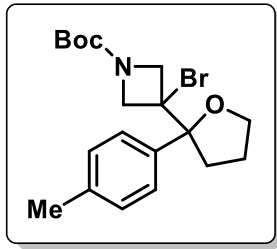

**10d**

**<sup>1</sup>H NMR**

(500 MHz, CDCl<sub>3</sub>)

- residual solvent

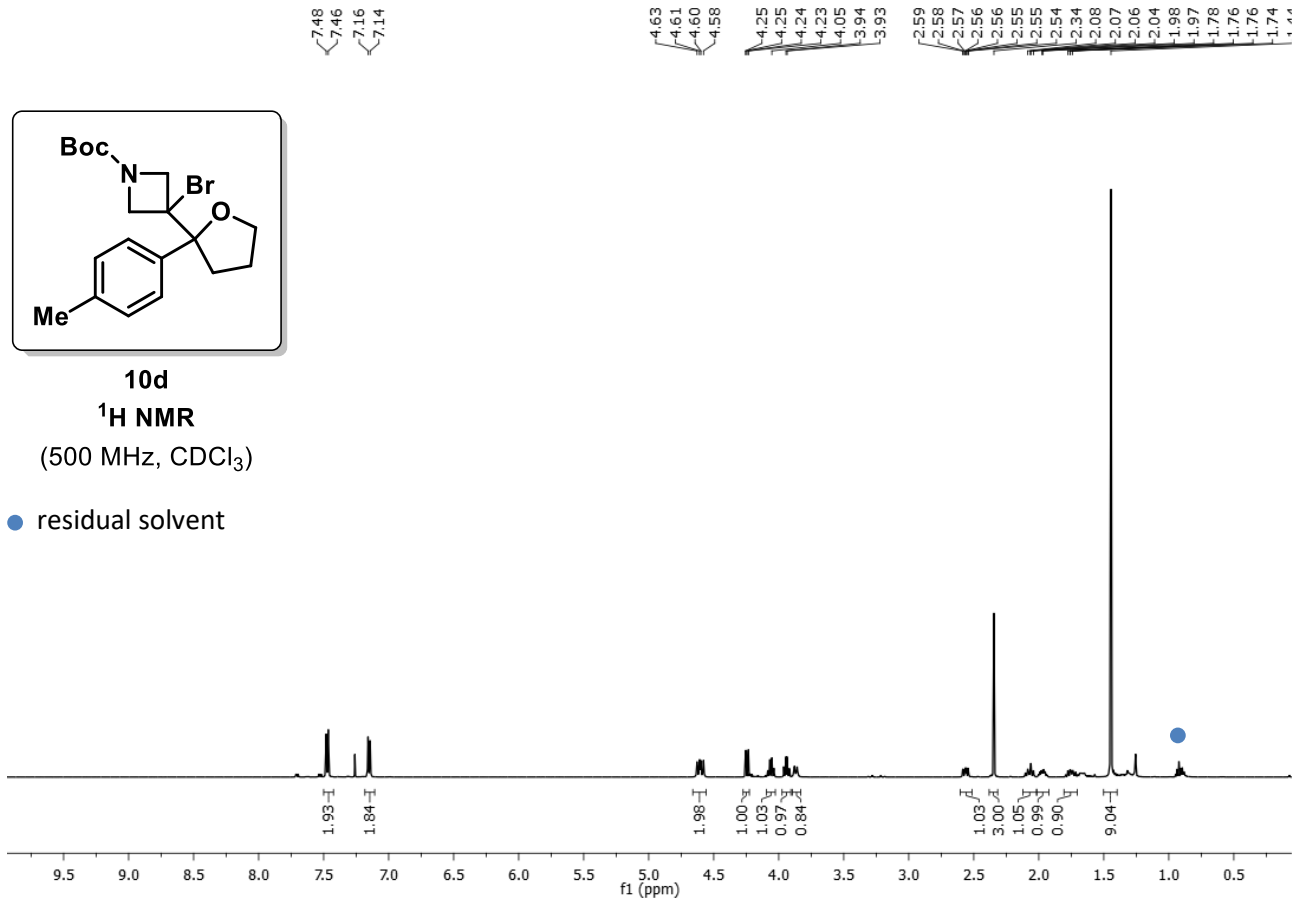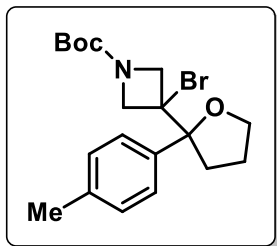

**10d**

**<sup>13</sup>C NMR**

(126 MHz, CDCl<sub>3</sub>)

- residual solvent

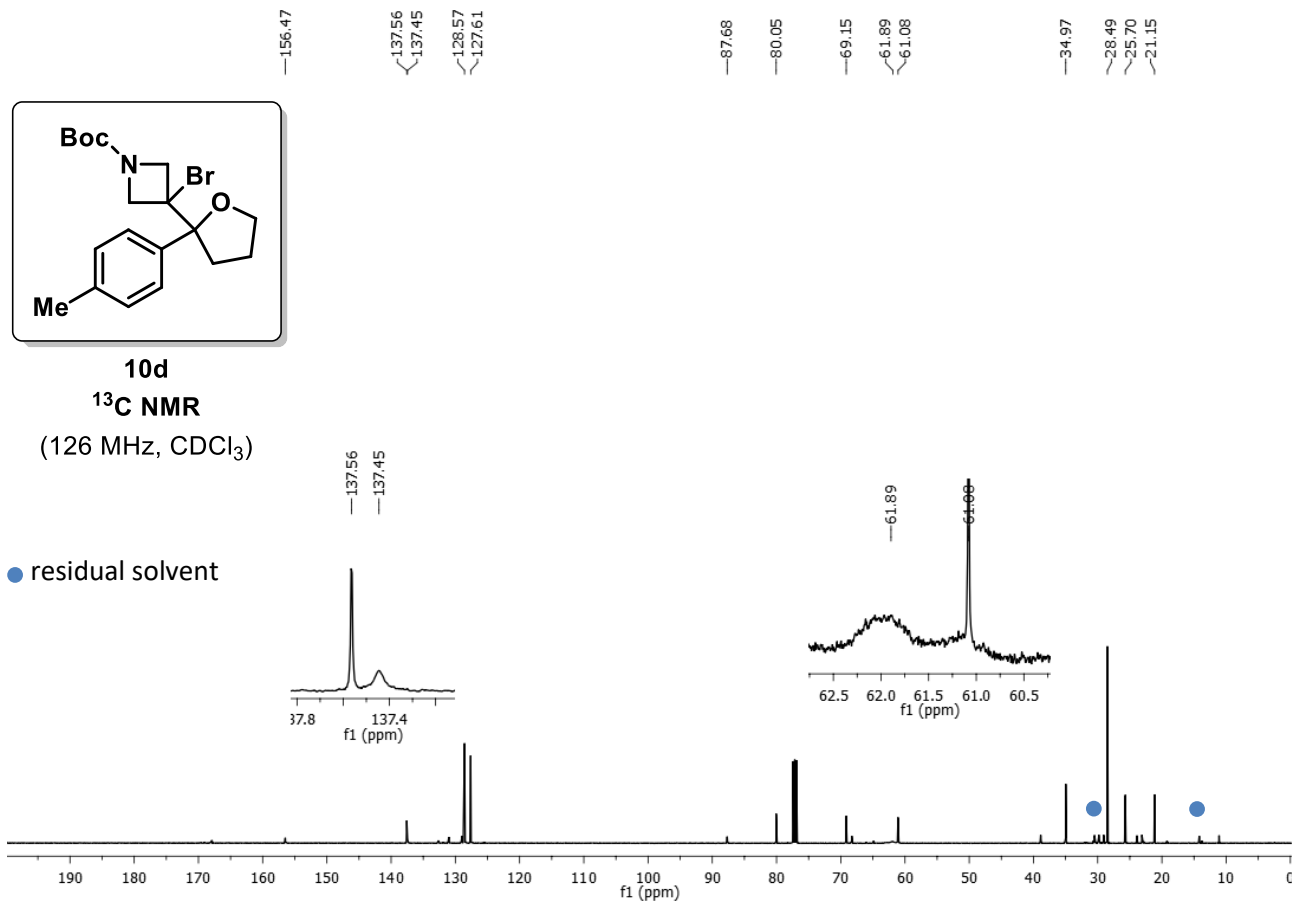

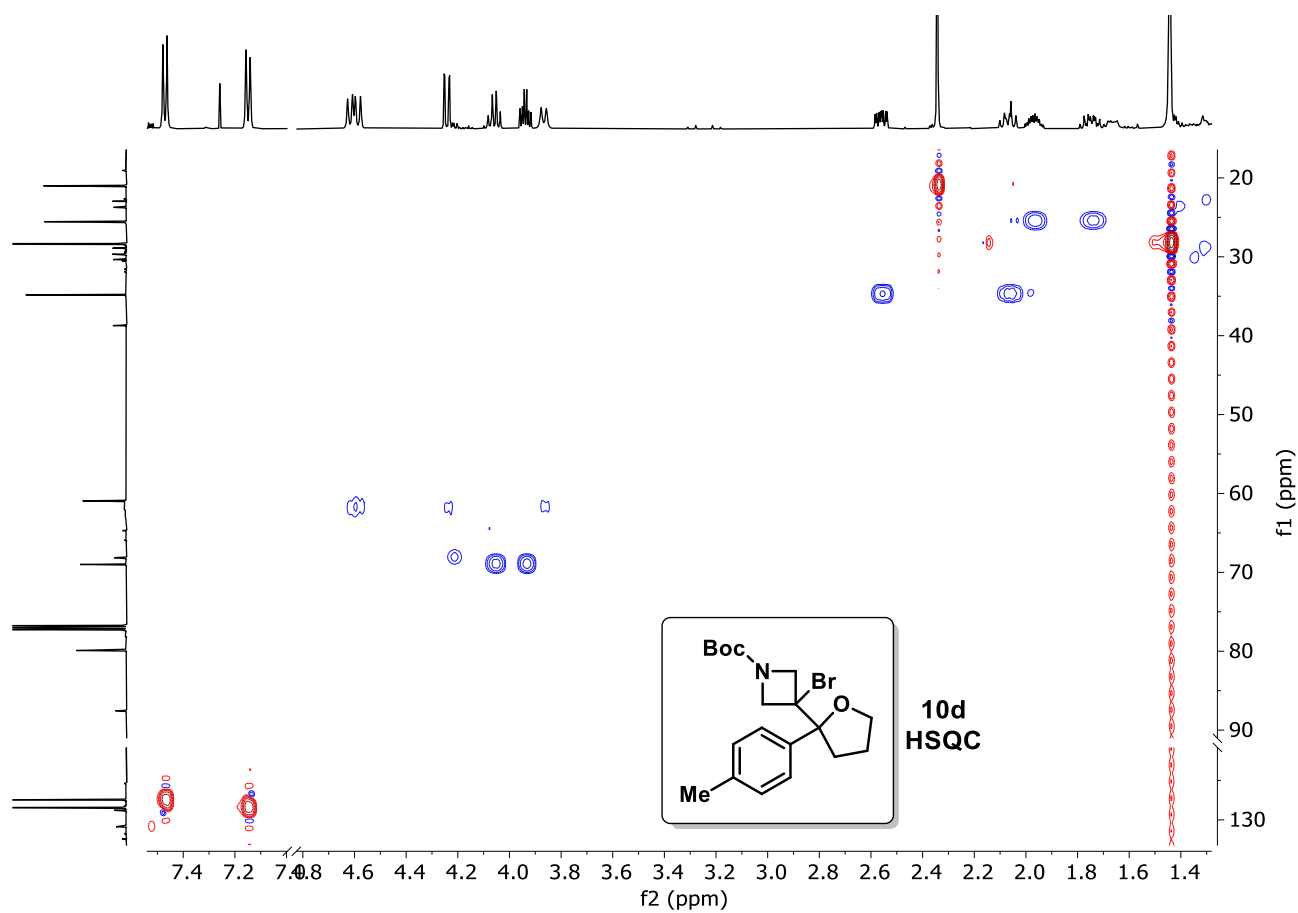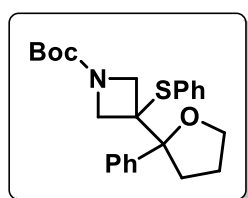

**10e**  
**<sup>1</sup>H NMR**  
(500 MHz, CDCl<sub>3</sub>)

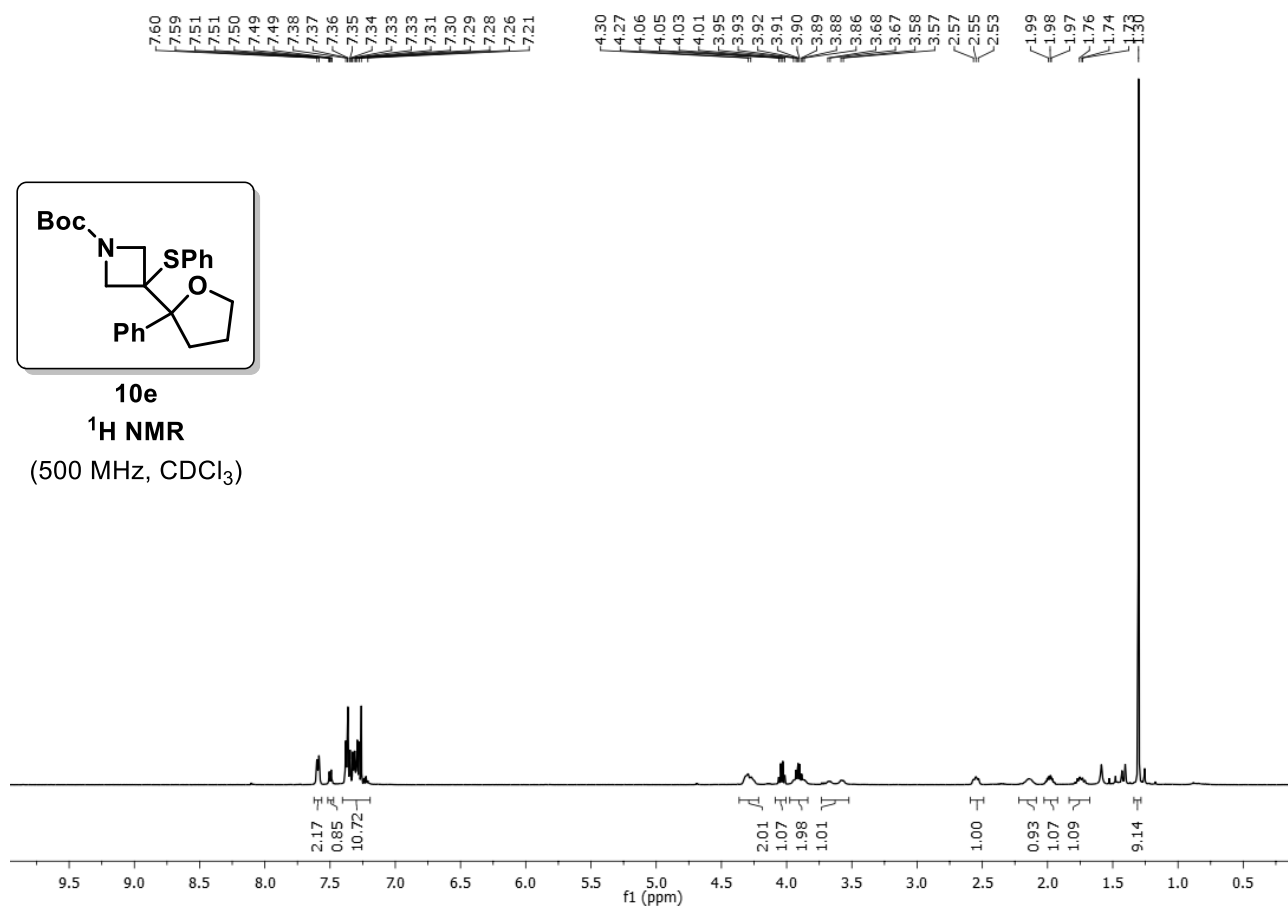



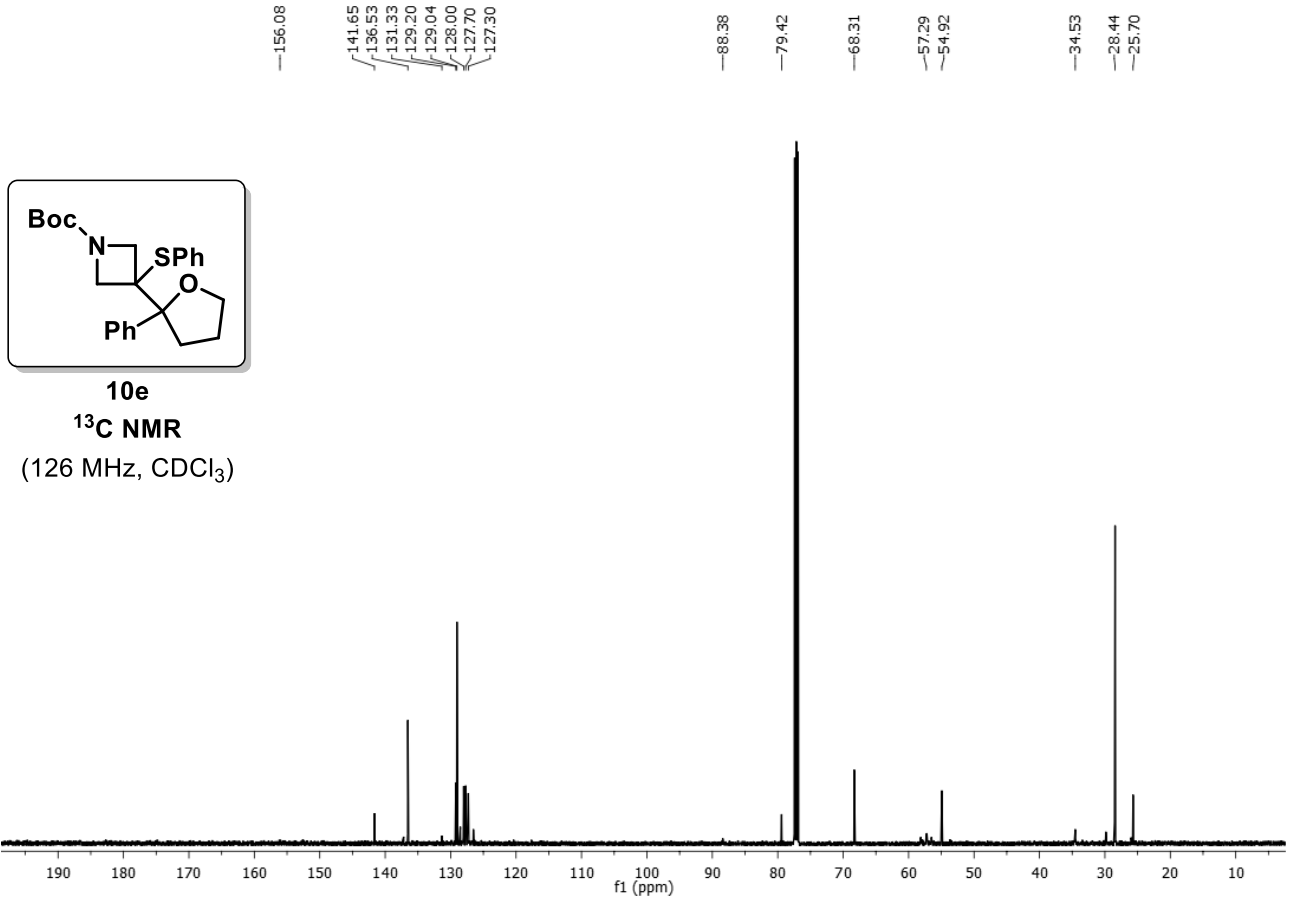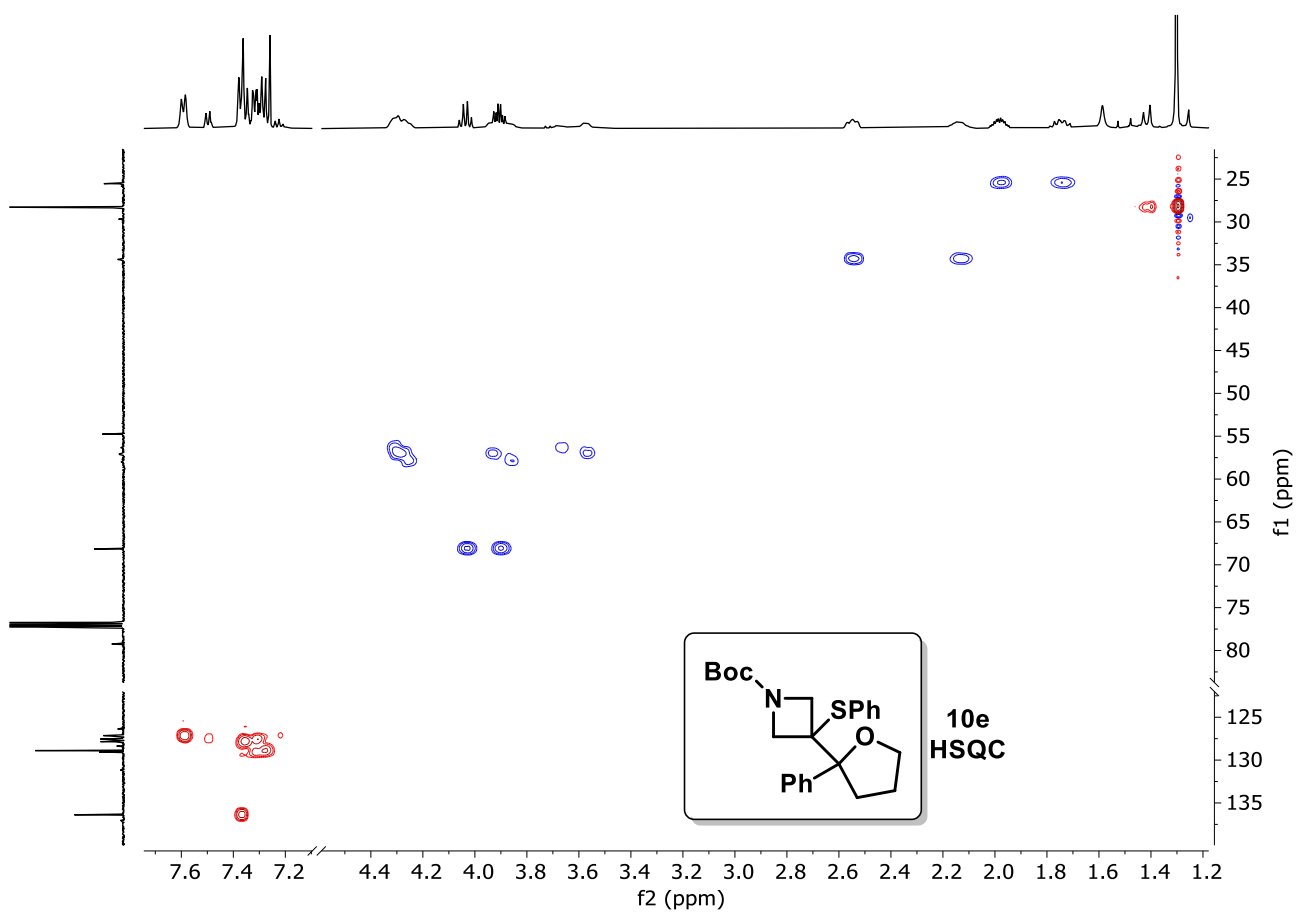

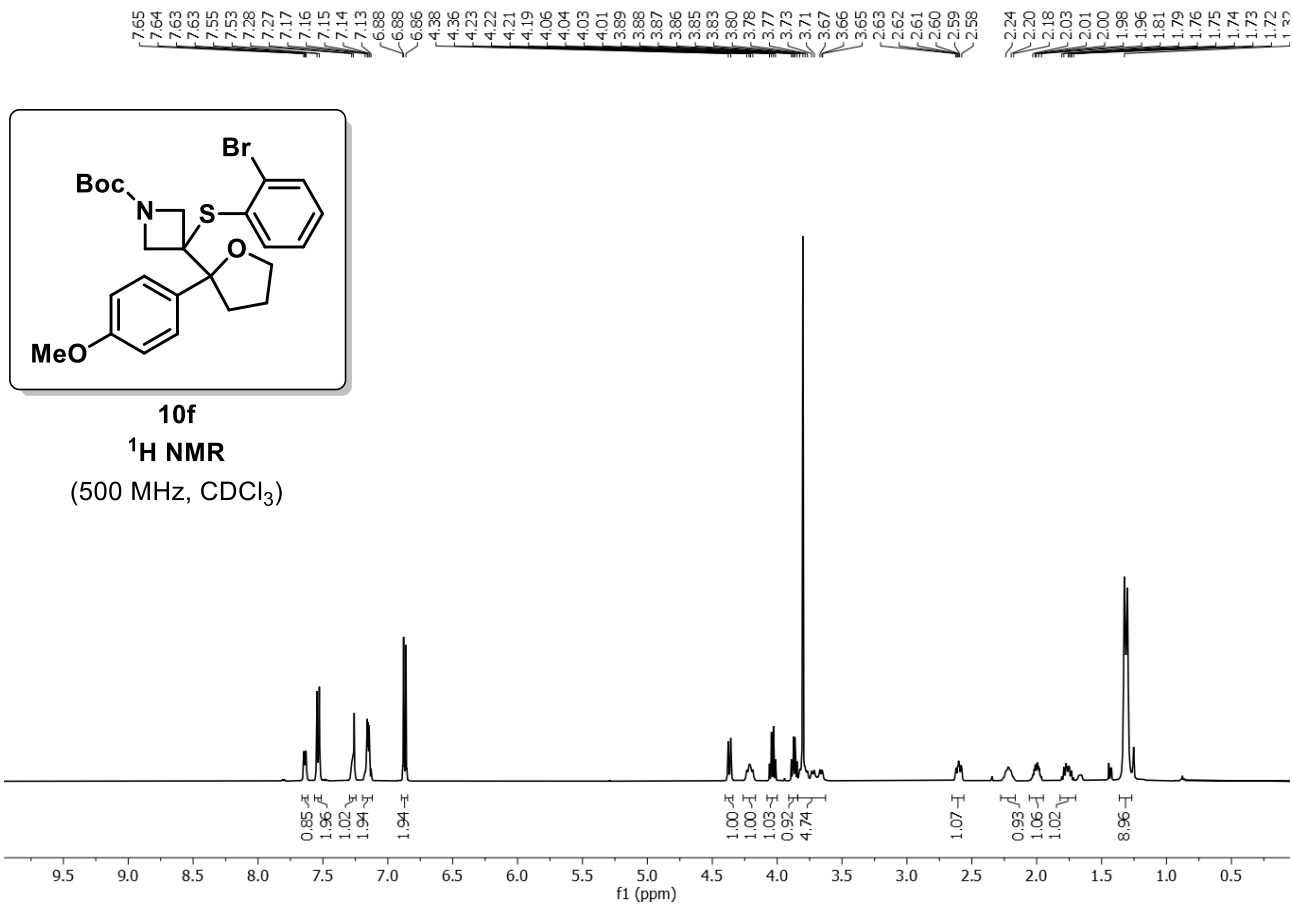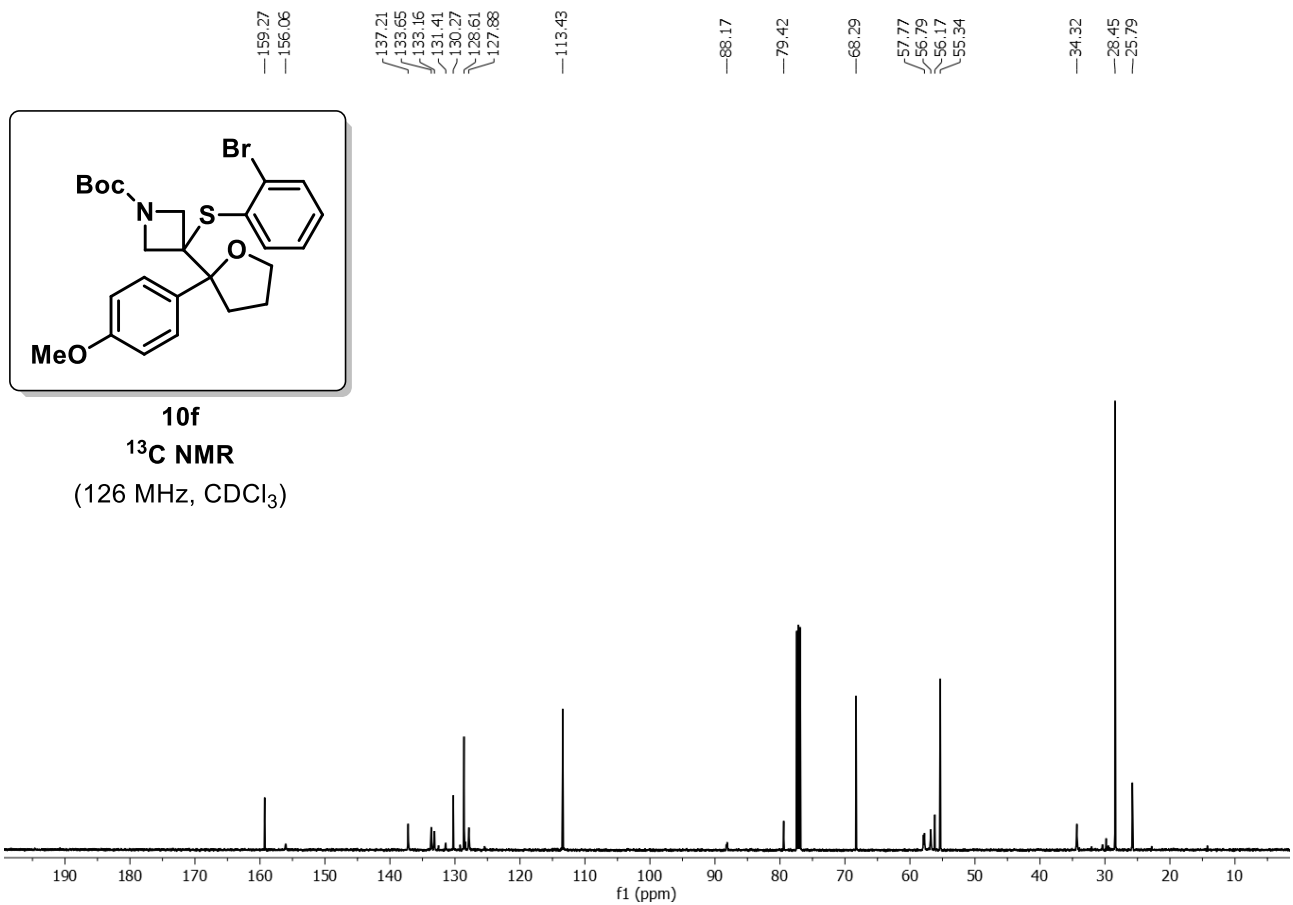

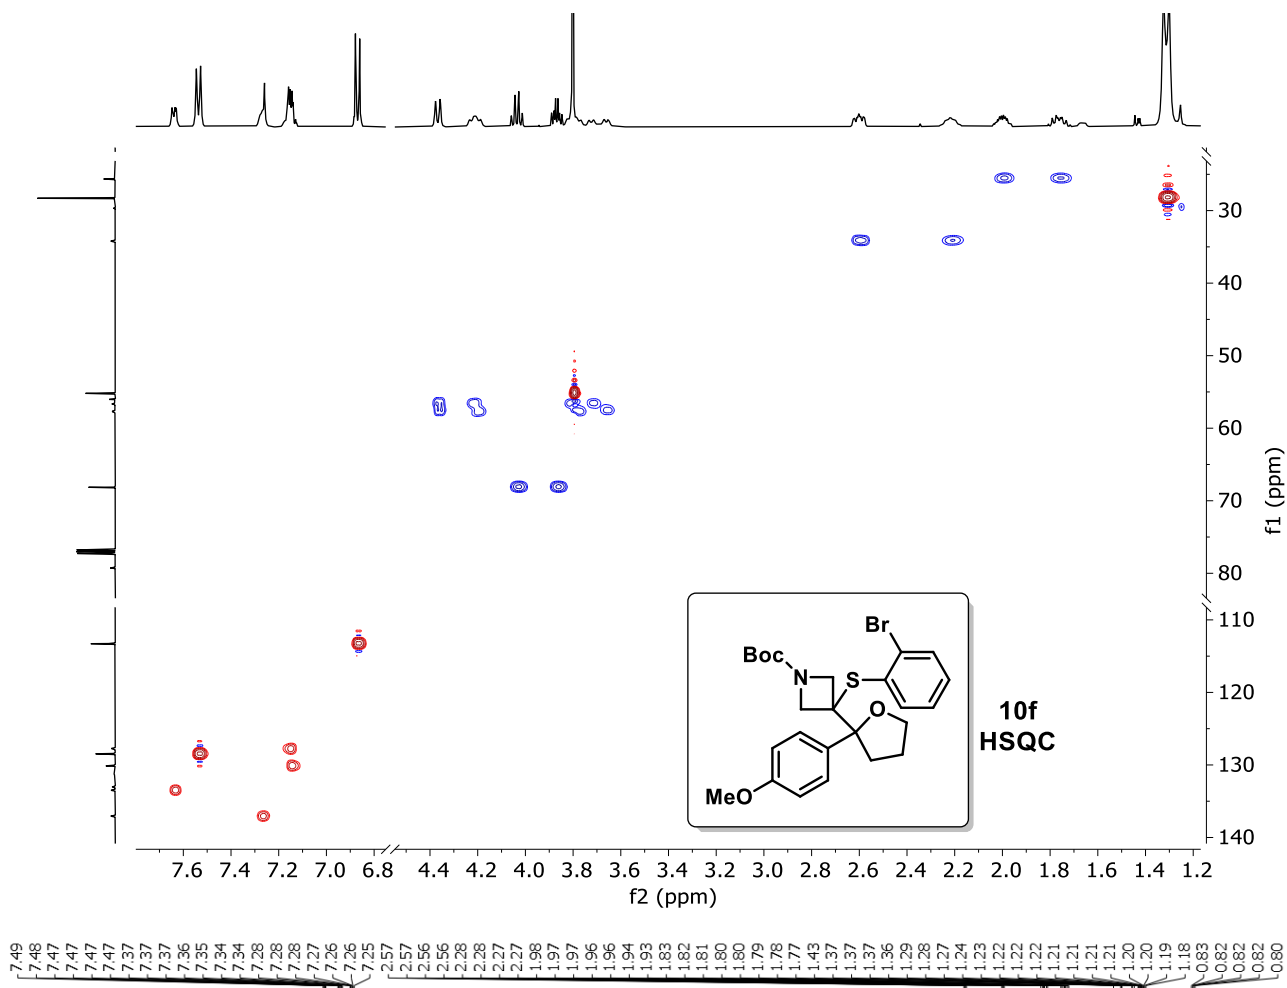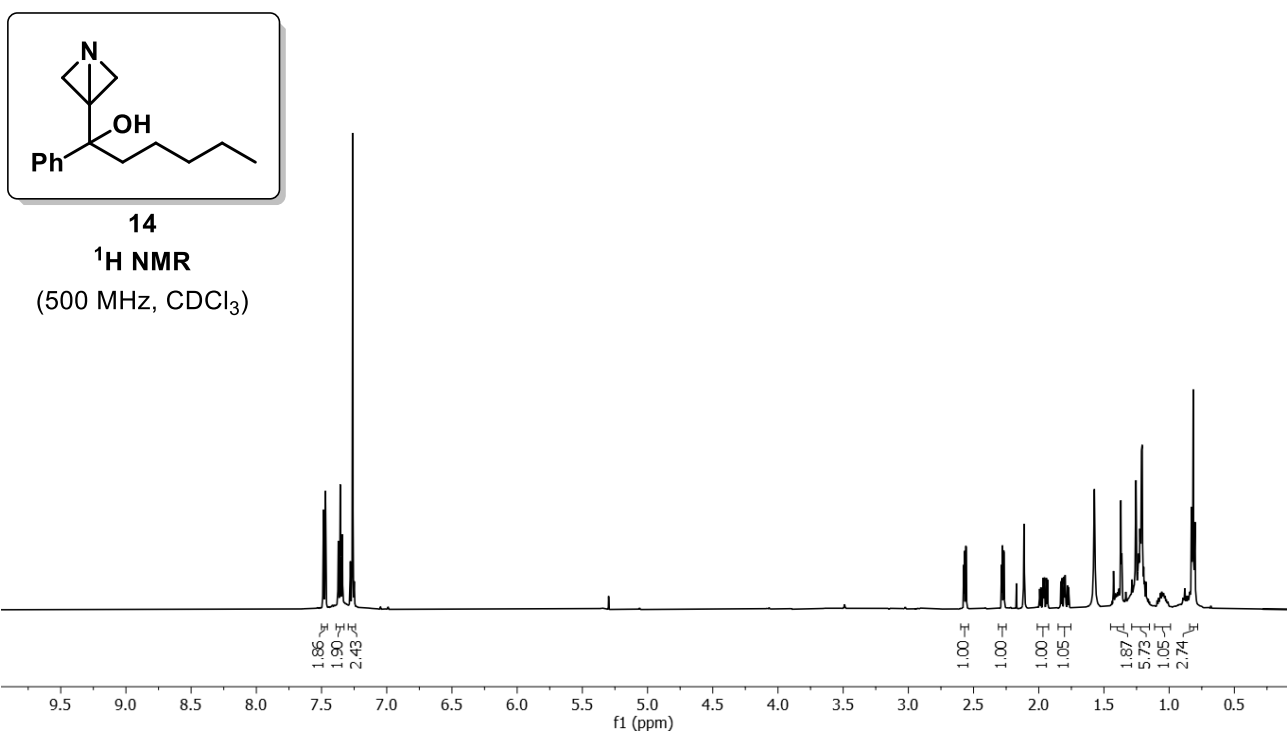

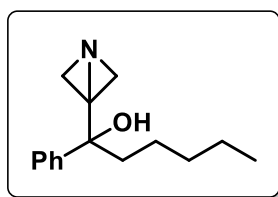

**14**  
<sup>13</sup>C NMR  
 (126 MHz, CDCl<sub>3</sub>)

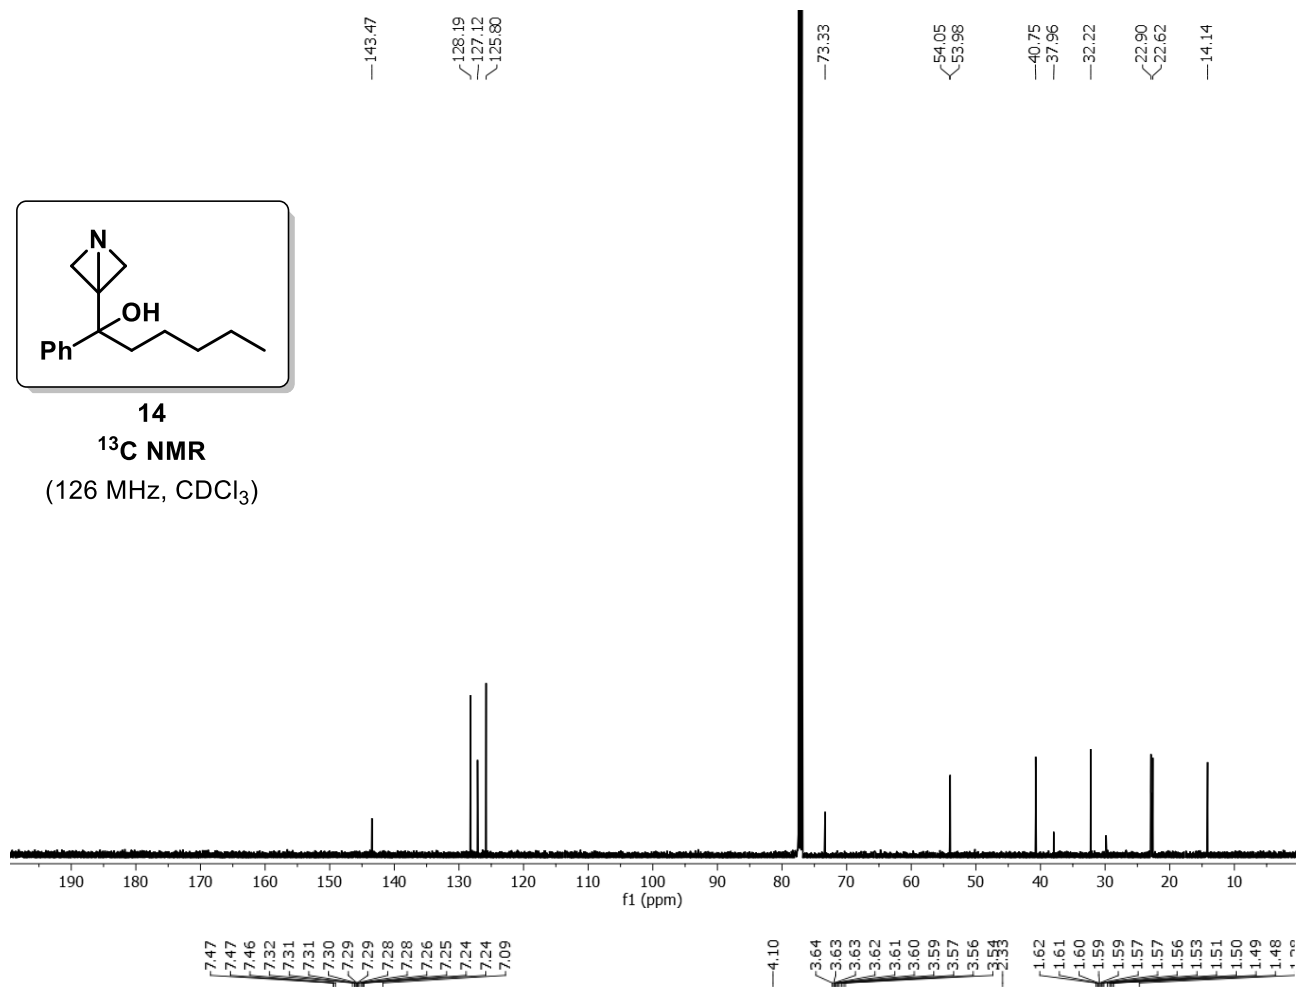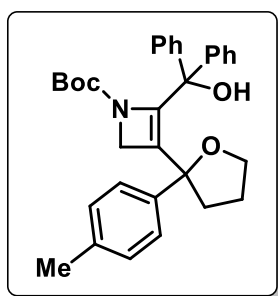

**15**  
<sup>1</sup>H NMR  
 (500 MHz, CDCl<sub>3</sub>)

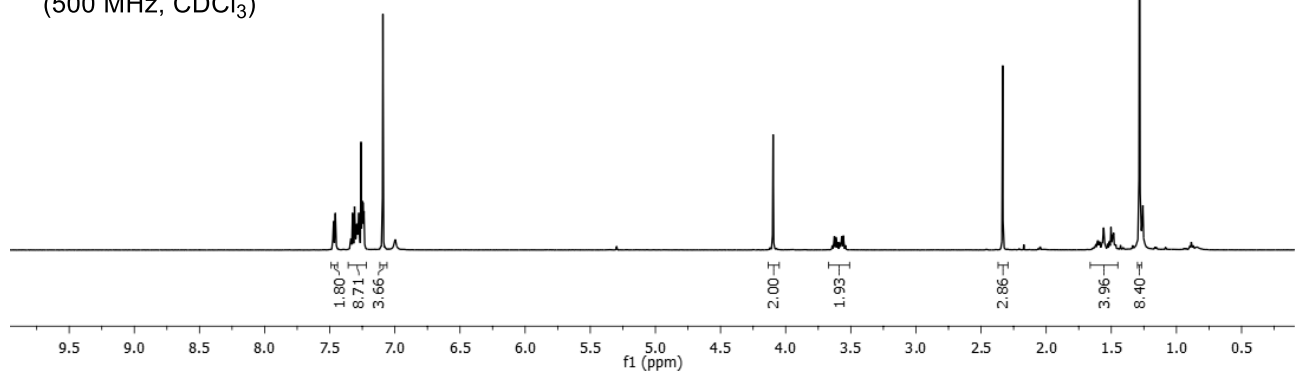

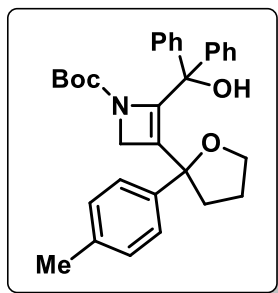

15

<sup>13</sup>C NMR

(126 MHz, CDCl<sub>3</sub>)

152.13  
145.82  
144.24  
143.61  
141.25  
136.77  
128.95  
128.47  
128.23  
128.04  
127.87  
127.82  
127.78  
127.69  
125.48

83.77  
81.30  
77.60  
66.64  
55.04  
36.18  
28.29  
25.72  
21.16

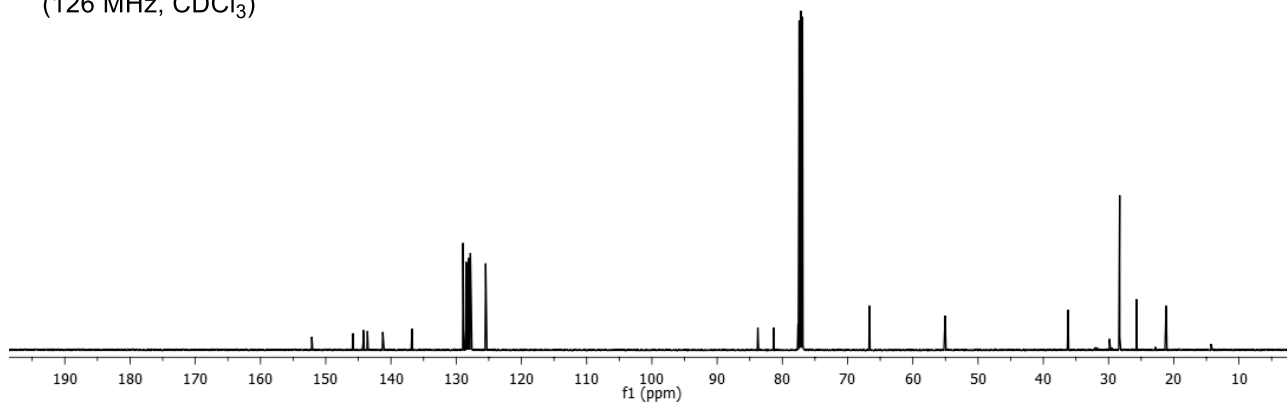

7.21  
7.19  
7.18  
6.94  
6.93  
6.92  
6.91  
6.86  
6.86  
6.85  
6.84  
2.54  
2.53  
2.52  
2.52  
2.46  
2.45  
2.45  
2.44  
2.33  
1.88  
1.86  
1.85  
1.84  
1.83  
1.81  
1.80  
1.65  
1.63  
1.62  
1.61  
1.60  
1.59  
1.58  
1.51  
1.50  
1.49  
1.48  
1.46  
1.45  
1.43  
1.42  
1.40  
1.39  
1.35  
1.35  
1.32  
1.32  
1.30  
1.29  
1.28  
1.26  
1.25  
1.25  
1.24  
1.23  
1.23  
1.22  
1.21  
1.20  
1.19  
1.18  
0.99  
0.97  
0.96  
0.86  
0.84  
0.83  
0.53  
0.52  
0.51

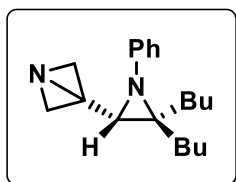

18

<sup>1</sup>H NMR

(500 MHz, CDCl<sub>3</sub>)

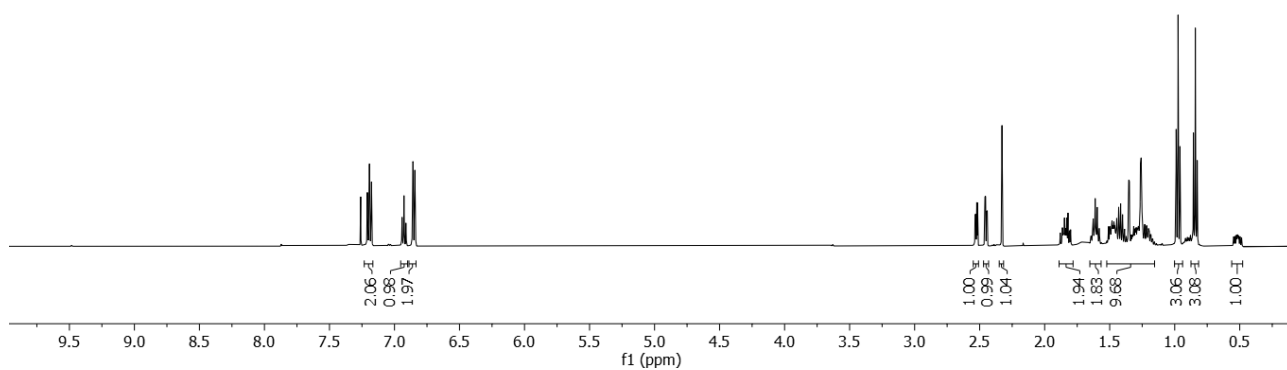

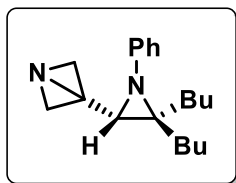

18

<sup>13</sup>C NMR

(126 MHz, CDCl<sub>3</sub>)

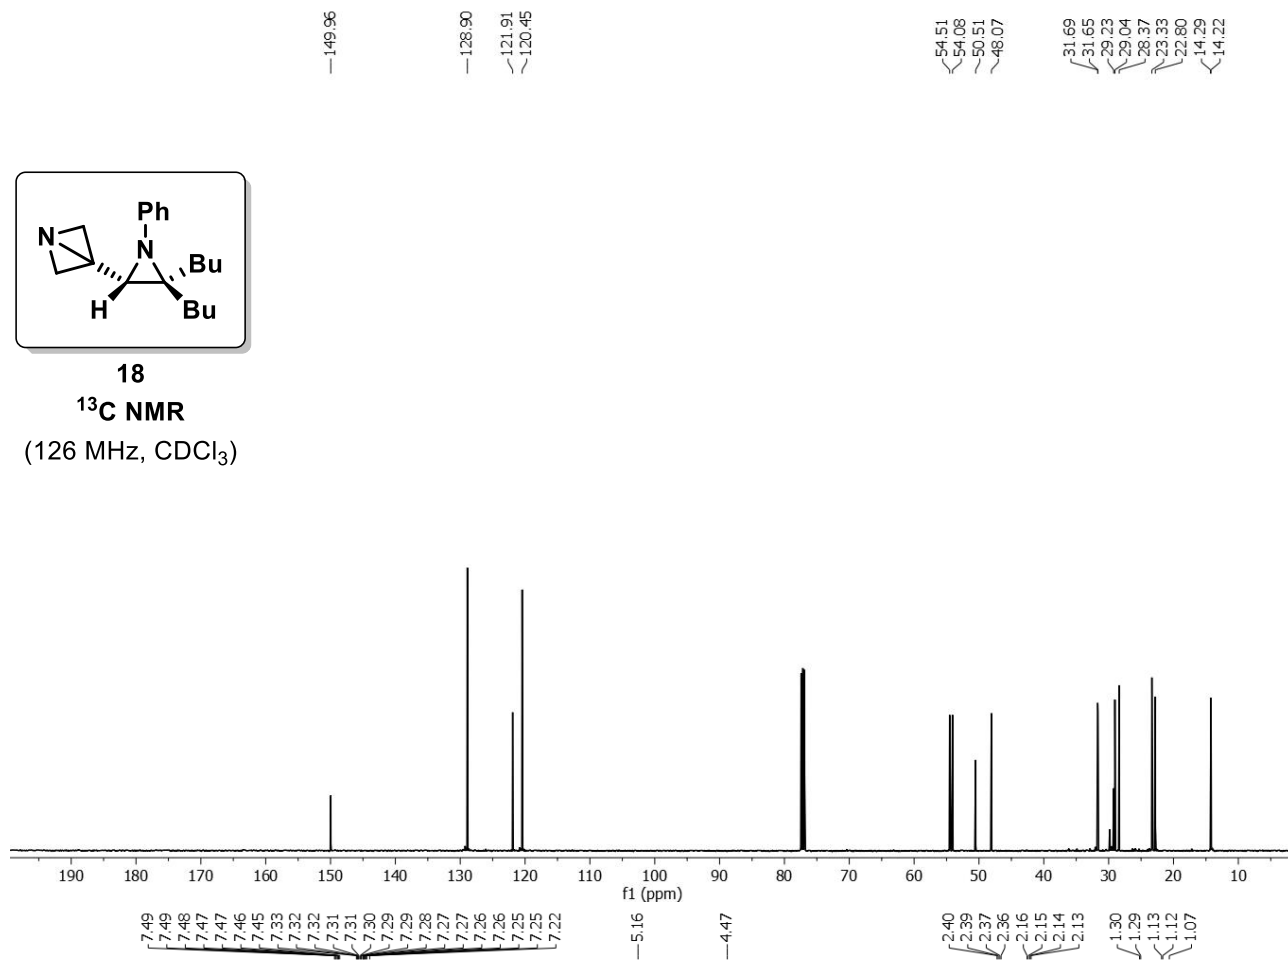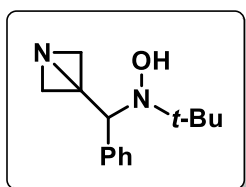

19

<sup>1</sup>H NMR

(300 MHz, CDCl<sub>3</sub>)

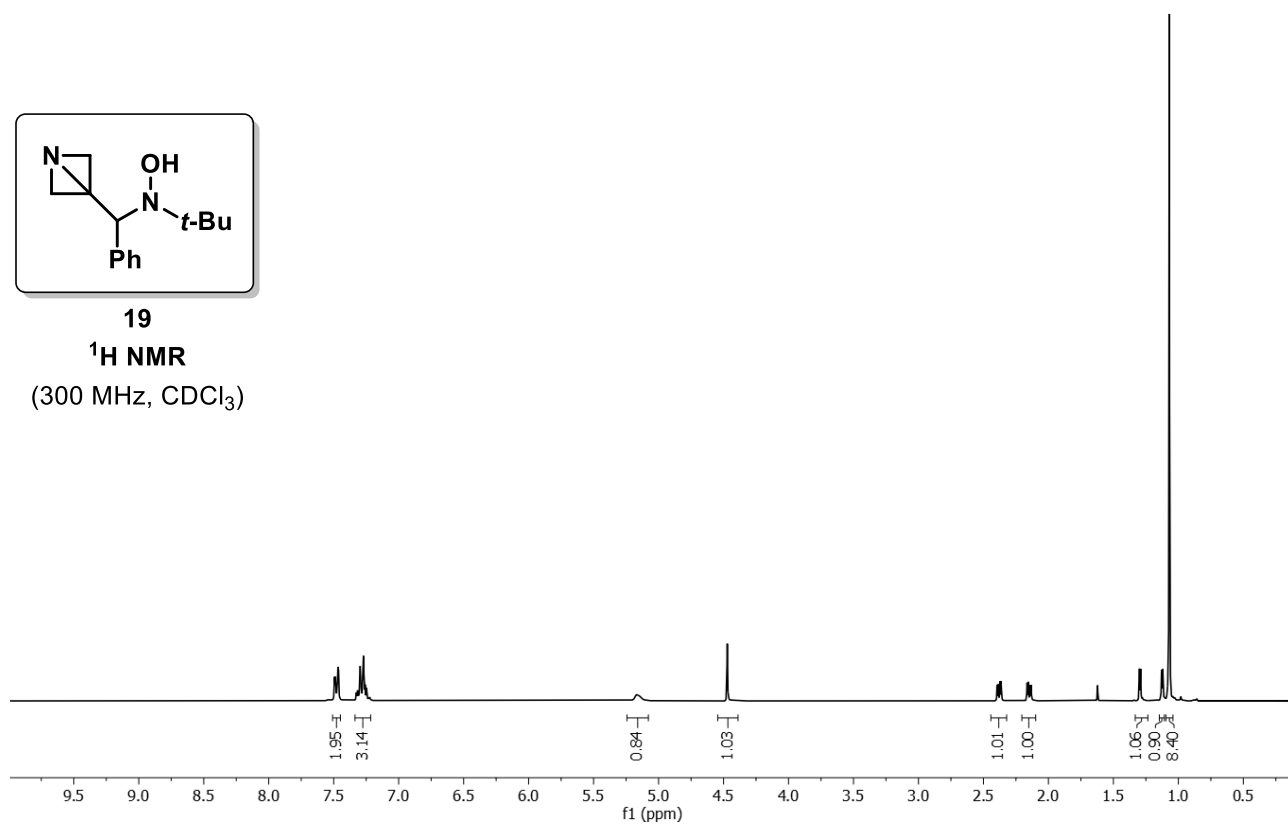

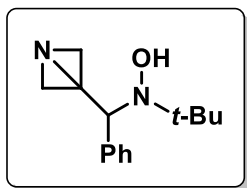

**19**  
<sup>13</sup>C NMR  
 (126 MHz, CDCl<sub>3</sub>)

— 138.57  
 / 128.88  
 \ 127.27  
 / 126.63  
 \ 63.19  
 / 58.97  
 \ 54.60  
 / 51.87  
 — 32.23  
 — 26.07

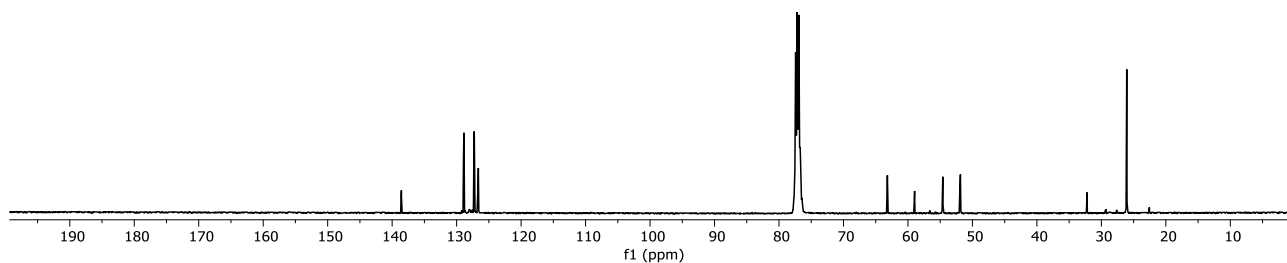

7.48  
7.47  
7.42  
7.41  
7.39  
7.36  
7.35  
7.35  
7.34  
7.34  
7.33  
7.32  
4.91  
4.22  
4.22  
4.20  
4.20  
4.08  
4.07  
4.05  
4.05  
3.91  
3.89  
3.89  
3.66  
3.64  
1.36  
1.07

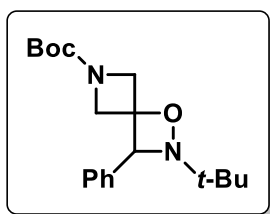

**20**  
<sup>1</sup>H NMR  
 (300 MHz, CDCl<sub>3</sub>)

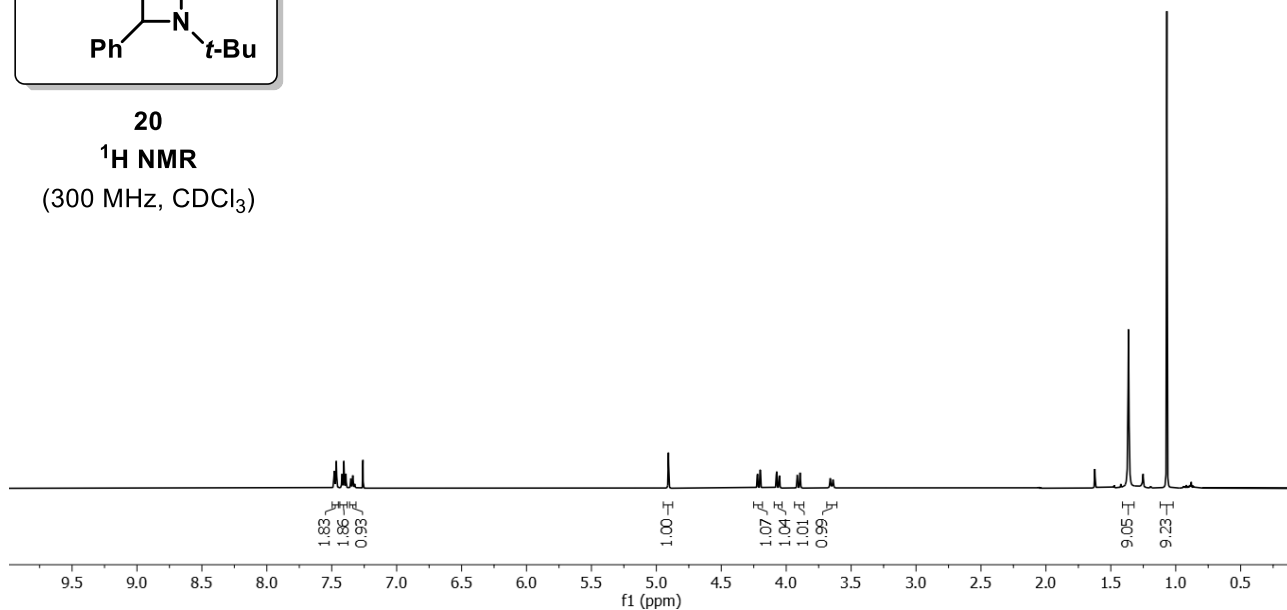

1.83  
1.86  
0.93  
1.00  
1.07  
1.04  
1.01  
0.99  
9.05  
9.23

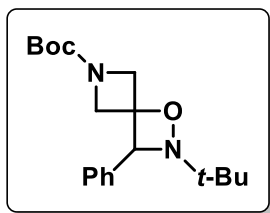

**20**  
<sup>13</sup>C NMR  
 (126 MHz, CDCl<sub>3</sub>)

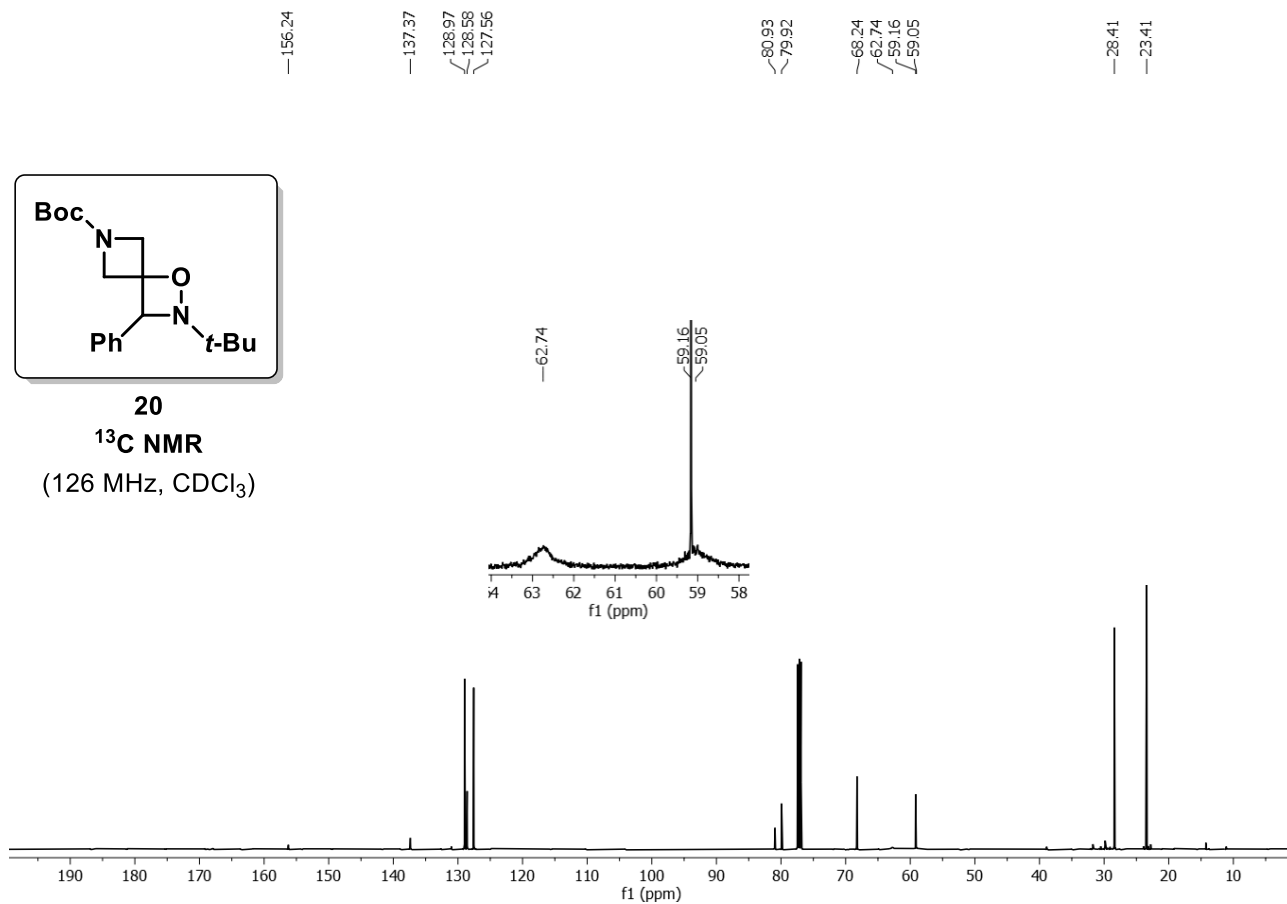



## 7. References

---

- <sup>1</sup> A. F. Burchat, J. M. Chong and N. Nielsen, *J. Organomet. Chem.*, 1997, **542**, 281.
- <sup>2</sup> R. M. Rodebaugh and N. H. Cromwell, *J. Heterocycl. Chem.* 1969, **6**, 439.
- <sup>3</sup> T. Aoyama, M. Hayakawa, S. Kubota, S. Ogawa, E. Nakajima, E. Mitsuyama, T. Iwabuchi, H. Kaneko, R. Obara, T. Takido, M. Kodomari and A. Ouchi, *Synthesis*, 2015, **47**, 2945.
- <sup>4</sup> L. Degennaro, F. Fanelli, A. Giovine and R. Luisi, *Adv. Synth. Catal.*, 2014, **357**, 21.
- <sup>5</sup> F. Yu, J.-N. Zhou, X.-C. Zhang, Y.-Z. Sui, F.-F. Wu, L.-J. Xie, A. S. C. Chan and J. Wu, *Chem. Eur. J.*, 2011, **17**, 14234.
- <sup>6</sup> M. M.-C. Lo and G. C. Fu, *Tetrahedron*, 2001, **57**, 2621.
- <sup>7</sup> X. Chen, Z.-Q. Liu, C.-P. Lin and Y.-G. Zheng, *Bioorganic Chemistry*, 2016, **65**, 82.
- <sup>8</sup> B. D. W. Allen, M. D. Hareram, A. C. Seastram, T. McBride, T. Wirth, D. L. Browne and L. C. Morrill, *Org. Lett.*, 2019, **21**, 9241.
- <sup>9</sup> F.-Q. Huang, J. Xie, J.-G. Sun, Y.-W. Wang, X. Dong, L.-W. Qi and B. Zhang, *Org. Lett.*, 2016, **18**, 684.
- <sup>10</sup> P. Musci, M. Colella, A. Sivo, G. Romanazzi, R. Luisi and L. Degennaro, *Org. Lett.*, 2020, **22**, 3623.
- <sup>11</sup> P. Musci, T. Keutz, F. Belaj, L. Degennaro, D. Cantillo, C. O. Kappe and R. Luisi, *Angew. Chem. Int. Ed.*, 2021, **60**, 6395.
